# Supplementary material for: High expression of MCM10 is predictive of poor outcomes in lung adenocarcinoma
Source: PeerJ. 2021 Feb 3;9:e10560. doi: 10.7717/peerj.10560 (PMC7866887; doi:10.7717/peerj.10560)
Supplement: Supplemental Information 1 [file peerj-09-10560-s001.xlsx]

## Sheet: Sheet1
shControl	shMCM10
1	0.516287
1	0.590909
1	0.647674
