# Supplementary material for: High expression of MCM10 is predictive of poor outcomes in lung adenocarcinoma
Source: PeerJ. 2021 Feb 3;9:e10560. doi: 10.7717/peerj.10560 (PMC7866887; doi:10.7717/peerj.10560)
Supplement: Supplemental Information 3 [file peerj-09-10560-s003.xlsx]

## Sheet: BP
Category	Term	Count	%	PValue	Genes	List Total	Pop Hits	Pop Total	Fold Enrichment	Bonferroni	Benjamini	FDR
GOTERM_BP_DIRECT	DNA replication initiation	3	0.0620091	0.00051607	CDC45, MCM10, MCM4	21	21	12321	83.8163	0.0483477	0.0483477	0.566932
GOTERM_BP_DIRECT	cytokinesis	3	0.0620091	0.000676286	PRC1, BIRC5, KIF20A	21	24	12321	73.3393	0.0628814	0.0319511	0.742342
GOTERM_BP_DIRECT	chromosome segregation	3	0.0620091	0.00227334	CENPN, OIP5, BIRC5	21	44	12321	40.0032	0.196268	0.0702408	2.47554
GOTERM_BP_DIRECT	double-strand break repair via break-induced replication	2	0.0413394	0.00647797	GINS2, CDC45	21	4	12321	293.357	0.464154	0.144421	6.90785
GOTERM_BP_DIRECT	positive regulation of exit from mitosis	2	0.0413394	0.00809123	BIRC5, UBE2C	21	5	12321	234.686	0.541556	0.144427	8.55925
GOTERM_BP_DIRECT	microtubule bundle formation	2	0.0413394	0.0319934	PRC1, KIF20A	21	20	12321	58.6714	0.955912	0.405635	30.1021
GOTERM_BP_DIRECT	mitotic spindle assembly	2	0.0413394	0.0398385	TPX2, BIRC5	21	25	12321	46.9371	0.979814	0.427382	36.0941
GOTERM_BP_DIRECT	G2/M transition of mitotic cell cycle	2	0.0413394	0.0414002	FOXM1, BIRC5	21	26	12321	45.1319	0.982734	0.397929	37.2297
GOTERM_BP_DIRECT	negative regulation of apoptotic process	3	0.0620091	0.0430051	CDK1, MAD2L1, BIRC5	21	205	12321	8.58606	0.9853	0.374296	38.3775

## Sheet: CC
Category	Term	Count	%	PValue	Genes	List Total	Pop Hits	Pop Total	Fold Enrichment	Bonferroni	Benjamini	FDR
GOTERM_CC_DIRECT	chromosome, centromeric region	4	0.0826788	2.38035e-06	CENPN, CDCA8, OIP5, BIRC5	22	18	13919	140.596	0.00011663	0.00011663	0.00228225
GOTERM_CC_DIRECT	midbody	5	0.103348	5.62113e-06	CDK1, CDCA8, PRC1, BIRC5, KIF20A	22	80	13919	39.5426	0.000275398	0.000137709	0.0053894
GOTERM_CC_DIRECT	replication fork protection complex	3	0.0620091	3.24022e-05	GINS2, CDC45, MCM10	22	6	13919	316.341	0.00158647	0.000529104	0.0310628
GOTERM_CC_DIRECT	spindle	3	0.0620091	0.00132426	PRC1, TPX2, KIF20A	22	36	13919	52.7235	0.0628685	0.0161019	1.2625
GOTERM_CC_DIRECT	chromosome passenger complex	2	0.0413394	0.00752199	CDCA8, BIRC5	22	5	13919	253.073	0.309246	0.0713229	6.9835
GOTERM_CC_DIRECT	cytoplasm	10	0.206697	0.00819462	CDK1, PRC1, NCAPG, OIP5, FOXM1, BIRC5, UBE2C, MCM10, CDKN3, MELK	22	2557	13919	2.47431	0.331815	0.0649904	7.58617
GOTERM_CC_DIRECT	chromocenter	2	0.0413394	0.0164773	CDCA8, OIP5	22	11	13919	115.033	0.556967	0.109793	14.7259
GOTERM_CC_DIRECT	mitotic spindle	2	0.0413394	0.0457757	CDK1, MAD2L1	22	31	13919	40.8182	0.899336	0.249485	36.1899
GOTERM_CC_DIRECT	spindle microtubule	2	0.0413394	0.0472185	CDK1, BIRC5	22	32	13919	39.5426	0.90653	0.231524	37.109
GOTERM_CC_DIRECT	centrosome	3	0.0620091	0.0760469	CDK1, CDC45, NCAPG	22	304	13919	6.24357	0.979258	0.321289	53.1562

## Sheet: MF
Category	Term	Count	%	PValue	Genes	List Total	Pop Hits	Pop Total	Fold Enrichment	Bonferroni	Benjamini	FDR
GOTERM_MF_DIRECT	single-stranded DNA binding	3	0.0620091	0.0016006	CDC45, MCM10, MCM4	14	54	11618	46.1032	0.0530074	0.0530074	1.39883
GOTERM_MF_DIRECT	ATP binding	6	0.124018	0.0060592	CDK1, UBE2C, MCM4, MELK, KIF20A, TK1	14	1146	11618	4.3448	0.186687	0.0981614	5.20439
GOTERM_MF_DIRECT	DNA replication origin binding	2	0.0413394	0.0100291	CDC45, MCM10	14	9	11618	184.413	0.290156	0.107953	8.48264

## Sheet: KEGG
Category	Term	Count	%	PValue	Genes	List Total	Pop Hits	Pop Total	Fold Enrichment	Bonferroni	Benjamini	FDR
KEGG_PATHWAY	Cell cycle	6	0.124018	2.20178e-07	CDK1, CDC45, CCNB2, MAD2L1, MCM4, CCNA2	10	123	6750	32.9268	4.62372e-06	4.62372e-06	0.000170007
KEGG_PATHWAY	Progesterone-mediated oocyte maturation	4	0.0826788	0.000158721	CDK1, CCNB2, MAD2L1, CCNA2	10	86	6750	31.3953	0.00332786	0.00166532	0.122489
KEGG_PATHWAY	Oocyte meiosis	3	0.0620091	0.00848556	CDK1, CCNB2, MAD2L1	10	108	6750	18.75	0.163858	0.057908	6.36815
KEGG_PATHWAY	p53 signaling pathway	2	0.0413394	0.0834499	CDK1, CCNB2	10	65	6750	20.7692	0.839572	0.367122	48.9737
