# Supplementary material for: High expression of MCM10 is predictive of poor outcomes in lung adenocarcinoma
Source: PeerJ. 2021 Feb 3;9:e10560. doi: 10.7717/peerj.10560 (PMC7866887; doi:10.7717/peerj.10560)
Supplement: Supplemental Information 4 [file peerj-09-10560-s004.xlsx]

## Sheet: Sheet1
Normal	Cancer
1	1.357
1	2.808
1	1.535
1	2.38
1	3.31
1	4.98
1	4.86
1	2.97
1	1.63
1	2.95
1	2.86
1	2.24
1	1.33
1	2.687
1	0.55
1	1.27
1	2.83
1	0.67
1	1.656
1	1.954
1	1.575
1	1.845
1	1.631
1	2.973
1	2.119
1	1.12
1	2.765
1	1.432
1	2.431
1	0.979
1	0.821
1	0.621
1	2.545
1	1.883
1	1.613
1	1.311
1	2.982
1	0.732
1	0.869
1	1.722
1	1.231
1	1.529
1	1.434
1	1.742
1	2.998
1	1.987
1	3.678
1	0.521
1	0.798
1	0.887
1	2.5345
1	1.982
1	2.534
1	2.432
1	2.9844
1	2.332
1	2.96
1	2.543
1	1.631
1	1.611
1	3.4743
1	0.6872
1	3.498
1	2.463
1	1.3566
1	2.9321
1	0.973
1	0.4345
1	1.511
1	2.8873
1	1.876
1	2.2911

## Sheet: Sheet2
＜3cm⮀	≥3cm⮀
3.678	1.357
0.521	2.808
0.798	1.535
0.887	2.38
2.5345	3.31
1.982	4.98
2.534	4.86
2.432	2.97
0.55	1.63
2.332	2.95
1.575	2.86
2.543	2.24
1.631	1.33
1.611	2.687
0.821	2.9844
0.6872	1.27
0.621	2.83
2.463	2.9321
1.3566	1.656
0.67	1.954
0.973	2.96
0.4345	1.845
1.511	1.631
0.732	2.973
1.876	2.119
1.12	2.2911
1.434	2.765
1.742	1.432
2.998	2.431
1.987	0.979
	3.4743
	3.498
	2.545
	1.883
	1.613
	1.311
	2.982
	2.8873
	0.869
	1.722
	1.231
	1.529

## Sheet: Sheet3
Lymphatic metastasis positive	Lymphatic metastasis negative
3.498	1.357
2.545	2.808
1.883	1.535
4.98	2.38
4.86	3.31
2.982	1.613
2.8873	1.311
0.869	2.97
1.722	1.63
1.231	2.95
1.529	2.86
2.687	2.24
2.9844	1.33
2.998	1.434
1.987	1.742
3.678	1.27
0.521	2.83
0.798	2.9321
0.887	1.656
2.5345	1.954
1.982	2.96
2.534	1.845
2.432	1.631
0.55	2.973
2.332	2.119
1.575	2.2911
2.543	2.765
1.631	1.432
1.611	2.431
0.821	0.979
0.6872	3.4743
0.621	1.12
2.463	1.876
1.3566	0.732
0.67
0.973
0.4345
1.511

## Sheet: Sheet4
Metastasis positive	Metastasis negative
1.845	1.357
1.631	2.808
2.973	1.535
2.119	2.38
1.12	3.31
1.876	4.98
	4.86
	2.97
	1.63
	2.95
	2.86
	2.24
	1.33
	2.687
	2.9844
	1.27
	2.83
	2.9321
	1.656
	1.954
	2.96
	2.2911
	2.765
	1.432
	2.431
	0.979
	3.4743
	3.498
	2.545
	1.883
	1.613
	1.311
	2.982
	2.8873
	0.869
	1.722
	1.231
	1.529
	1.434
	1.742
	2.998
	1.987
	3.678
	0.521
	0.798
	0.887
	2.5345
	1.982
	2.534
	2.432
	0.55
	2.332
	1.575
	2.543
	1.631
	1.611
	0.821
	0.6872
	0.621
	2.463
	1.3566
	0.67
	0.973
	0.4345
	1.511
	0.732

## Sheet: Sheet5
shControl	shMCM10
1	0.516287
1	0.590909
1	0.647674
