# Supplementary material for: High expression of MCM10 is predictive of poor outcomes in lung adenocarcinoma
Source: PeerJ. 2021 Feb 3;9:e10560. doi: 10.7717/peerj.10560 (PMC7866887; doi:10.7717/peerj.10560)
Supplement: Supplemental Information 6 [file peerj-09-10560-s006.xlsx]

## Sheet: GSE32863
ID	adj.P.Val	P.Value	t	B	logFC	Gene.symbol	Gene.title
ILMN_1786396	0.416	0.00659	-2.81973	-2.41176	-0.289	ZZEF1	zinc finger ZZ-type and EF-hand domain containing 1
ILMN_2362549	0.3161	0.00127	3.3895	-1.00113	0.469	ZWINT	ZW10 interacting kinetochore protein
ILMN_2362545	0.418	0.00689	2.80352	-2.4492	0.169	ZWINT	ZW10 interacting kinetochore protein
ILMN_1773868	0.3454	0.00245	-3.16953	-1.56669	-0.634	ZRSR2	zinc finger CCCH-type, RNA binding motif and serine/arginine rich 2
ILMN_2398587	0.4442	0.00945	2.68587	-2.71604	0.3	ZNRD1	zinc ribbon domain containing 1
ILMN_1727938	0.44	0.0089	2.70849	-2.6654	0.112	ZNF764	zinc finger protein 764
ILMN_1656192	0.3525	0.00262	3.14641	-1.62468	0.0989	ZNF704	zinc finger protein 704
ILMN_1713454	0.3541	0.00277	-3.12769	-1.67141	-0.379	ZNF671	zinc finger protein 671
ILMN_1785926	0.3585	0.00324	-3.07348	-1.80565	-0.362	ZNF621	zinc finger protein 621
ILMN_2075820	0.2932	0.000655	3.60496	-0.42396	0.206	ZNF598	zinc finger protein 598
ILMN_1653310	0.3937	0.00456	-2.95251	-2.09926	-0.0826	ZNF580	zinc finger protein 580
ILMN_1677785	0.4455	0.00957	-2.68114	-2.72659	-0.281	ZNF559	zinc finger protein 559
ILMN_1681846	0.4185	0.0069	-2.80262	-2.45128	-0.201	ZNF540	zinc finger protein 540
ILMN_1774757	0.4401	0.00901	2.7037	-2.67616	0.0569	ZNF496	zinc finger protein 496
ILMN_1656504	0.2698	0.000586	-3.64036	-0.32707	-0.144	ZNF304	zinc finger protein 304
ILMN_1663858	0.437	0.00827	2.73579	-2.60385	0.128	ZNF286A	zinc finger protein 286A
ILMN_1802094	0.3959	0.00478	2.9356	-2.13962	0.0946	ZNF280A	zinc finger protein 280A
ILMN_1787539	0.3692	0.0037	-3.02623	-1.92131	-0.245	ZNF177	zinc finger protein 177
ILMN_1695079	0.4401	0.00903	-2.70295	-2.67784	-0.167	ZNF101	zinc finger protein 101
ILMN_1720829	0.4246	0.00759	-2.76761	-2.53154	-0.636	ZFP36	ZFP36 ring finger protein
ILMN_1720053	0.4311	0.00795	2.75037	-2.57081	0.323	ZFAND3	zinc finger AN1-type containing 3
ILMN_1730907	0.3937	0.00458	2.95112	-2.10257	0.399	ZFAND1	zinc finger AN1-type containing 1
ILMN_1668270	0.4101	0.00623	2.84024	-2.36418	0.309	ZDHHC18	zinc finger DHHC-type containing 18
ILMN_1703370	0.3161	0.00117	3.41792	-0.92629	0.486	ZDHHC12	zinc finger DHHC-type containing 12
ILMN_1667068	0.4329	0.00804	-2.74617	-2.58034	-0.27	ZC3HAV1	zinc finger CCCH-type containing, antiviral 1
ILMN_1796737	0.437	0.0083	-2.73452	-2.60675	-0.398	ZBTB7C	zinc finger and BTB domain containing 7C
ILMN_2093500	0.3937	0.00457	-2.95181	-2.10093	-0.431	ZBED5	zinc finger BED-type containing 5
ILMN_1812580	0.3091	0.001	3.46825	-0.79273	0.437	YDJC	YdjC homolog (bacterial)
ILMN_1696266	0.3525	0.00257	3.15275	-1.60881	0.306	XRCC3	X-ray repair cross complementing 3
ILMN_1743711	0.3432	0.00231	3.18913	-1.51733	0.599	XPOT	exportin for tRNA
ILMN_2188374	0.4453	0.00955	2.68162	-2.72551	0.193	XPOT	exportin for tRNA
ILMN_1787591	0.4436	0.00936	-2.68932	-2.70834	-0.105	XPA	XPA, DNA damage recognition and repair factor
ILMN_1711166	0.3525	0.00259	3.15104	-1.61308	0.29	WRAP73	WD repeat containing, antisense to TP73
ILMN_1766729	0.3959	0.00484	2.93114	-2.15026	0.0697	WNT9A	Wnt family member 9A
ILMN_2279873	0.2698	0.000555	-3.65769	-0.27945	-0.196	WHAMM	WAS protein homolog associated with actin, golgi membranes and microtubules
ILMN_1752755	0.3366	0.0015	-3.33549	-1.14228	-0.642	VWF	von Willebrand factor
ILMN_1666632	0.4408	0.00906	2.7016	-2.68085	0.269	VPS52	VPS52, GARP complex subunit
ILMN_1692754	0.3432	0.00209	-3.22447	-1.42781	-0.421	VMP1	vacuole membrane protein 1
ILMN_1735910	0.4081	0.00605	-2.85062	-2.33999	-0.4	VMO1	vitelline membrane outer layer 1 homolog
ILMN_1693060	0.4246	0.00744	2.77478	-2.51516	0.0563	VEGFA	vascular endothelial growth factor A
ILMN_1700690	0.408	0.00603	-2.852	-2.33679	-0.396	VAT1	vesicle amine transport 1
ILMN_1755507	0.3432	0.00229	-3.1926	-1.50858	-0.0619	VARS	valyl-tRNA synthetase
ILMN_1729319	0.4449	0.00951	-2.68332	-2.72173	-0.285	USP7	ubiquitin specific peptidase 7
ILMN_1671494	0.2537	0.000195	3.98232	0.63641	0.484	USP5	ubiquitin specific peptidase 5
ILMN_2115696	0.3982	0.00531	2.89793	-2.22898	0.281	USP42	ubiquitin specific peptidase 42
ILMN_1721116	0.4166	0.00676	2.81058	-2.43293	0.318	USP10	ubiquitin specific peptidase 10
ILMN_1790461	0.4145	0.00647	2.82627	-2.39663	0.449	UQCC2	ubiquinol-cytochrome c reductase complex assembly factor 2
ILMN_1669747	0.3161	0.00129	-3.38532	-1.0121	-0.572	UNC13B	unc-13 homolog B
ILMN_1786065	0.3161	0.00128	3.38796	-1.00518	0.729	UHRF1	ubiquitin like with PHD and ring finger domains 1
ILMN_1736939	0.383	0.00426	-2.97667	-2.04127	-0.641	UGCG	UDP-glucose ceramide glucosyltransferase
ILMN_2292334	0.4389	0.00848	2.72634	-2.62521	0.0519	UBTF	upstream binding transcription factor, RNA polymerase I
ILMN_1741253	0.3161	0.00118	3.41378	-0.9372	0.353	UBR5	ubiquitin protein ligase E3 component n-recognin 5
ILMN_1711470	0.3366	0.00154	3.32566	-1.16782	0.64	UBE2T	ubiquitin conjugating enzyme E2 T
ILMN_1808591	0.3432	0.00241	3.17479	-1.55347	0.768	UBE2S	ubiquitin conjugating enzyme E2 S
ILMN_1782954	0.3566	0.00291	3.11031	-1.71462	0.418	UBE2K	ubiquitin conjugating enzyme E2 K
ILMN_2301083	0.3575	0.00321	3.07671	-1.79768	1.14	UBE2C	ubiquitin conjugating enzyme E2 C
ILMN_2265654	0.4295	0.00786	2.75481	-2.56071	0.226	UBE2C	ubiquitin conjugating enzyme E2 C
ILMN_1794612	0.3413	0.00162	-3.31033	-1.20754	-0.699	UBA7	ubiquitin like modifier activating enzyme 7
ILMN_1697448	0.437	0.0083	-2.73432	-2.6072	-0.586	TXNIP	thioredoxin interacting protein
ILMN_1738369	0.3161	0.00112	3.43024	-0.89371	0.359	TUFM	Tu translation elongation factor, mitochondrial
ILMN_2215640	0.383	0.00429	2.97431	-2.04695	0.413	TUBA3D	tubulin alpha 3d
ILMN_1758497	0.3973	0.00499	2.92046	-2.17563	0.161	TTYH1	tweety family member 1
ILMN_1788166	0.3692	0.00367	3.02989	-1.91238	0.415	TTK	TTK protein kinase
ILMN_1718621	0.3959	0.00479	-2.93508	-2.14087	-0.393	TSPAN32	tetraspanin 32
ILMN_1657194	0.3161	0.00115	-3.42255	-0.91403	-0.14	TSNAXIP1	translin associated factor X interacting protein 1
ILMN_1868751	0.4218	0.00701	2.79722	-2.46371	0.0925	TSL	testis-expressed, seven-twelve, leukemia
ILMN_1711091	0.2698	0.000552	3.6591	-0.27555	0.182	TSC22D1	TSC22 domain family member 1
ILMN_2116075	0.3823	0.00412	2.98913	-2.01124	0.242	TRUB2	TruB pseudouridine synthase family member 2
ILMN_1700337	0.3703	0.00377	3.02023	-1.93591	0.448	TROAP	trophinin associated protein
ILMN_2172547	0.3366	0.00155	-3.32452	-1.17077	-0.114	TRIM74	tripartite motif containing 74
ILMN_2404665	0.3366	0.00149	-3.33701	-1.13835	-0.229	TRIM5	tripartite motif containing 5
ILMN_1736575	0.3828	0.00419	2.98288	-2.02632	0.391	TRIM28	tripartite motif containing 28
ILMN_1699737	0.3161	0.00115	3.42388	-0.91052	0.321	TRAP1	TNF receptor associated protein 1
ILMN_2405991	0.3566	0.003	3.10034	-1.73933	0.365	TRAF7	TNF receptor associated factor 7
ILMN_1796949	0.2998	0.000748	3.56237	-0.53977	0.659	TPX2	TPX2, microtubule nucleation factor
ILMN_2181191	0.3432	0.00222	3.20362	-1.4807	0.424	TPI1	triosephosphate isomerase 1
ILMN_1707627	0.408	0.00602	2.85289	-2.33469	0.507	TPI1	triosephosphate isomerase 1
ILMN_1746426	0.408	0.00602	2.85276	-2.335	0.313	TOMM70	translocase of outer mitochondrial membrane 70
ILMN_2082314	0.4056	0.00568	-2.87396	-2.2854	-0.446	TOM1	target of myb1 membrane trafficking protein
ILMN_1764788	0.3432	0.00206	-3.22922	-1.41573	-0.428	TNFRSF1B	TNF receptor superfamily member 1B
ILMN_1699265	0.3631	0.00334	-3.06271	-1.83211	-0.559	TNFRSF10B	TNF receptor superfamily member 10b
ILMN_1791123	0.3432	0.00238	-3.17924	-1.54226	-0.846	TMPRSS2	transmembrane protease, serine 2
ILMN_1688848	0.4392	0.00853	-2.72428	-2.62987	-0.381	TMEM44	transmembrane protein 44
ILMN_1678004	0.383	0.00438	-2.96667	-2.06531	-0.384	TMEM41B	transmembrane protein 41B
ILMN_2212714	0.3541	0.00274	3.13093	-1.66334	0.251	TMEM39B	transmembrane protein 39B
ILMN_1700419	0.3648	0.0034	3.05619	-1.84811	0.432	TMEM208	transmembrane protein 208
ILMN_2145518	0.4401	0.009	-2.70399	-2.67549	-0.469	TMEM126B	transmembrane protein 126B
ILMN_2108493	0.3421	0.00169	3.29529	-1.24641	0.109	TMEM120B	transmembrane protein 120B
ILMN_2414762	0.3566	0.00316	-3.08148	-1.78594	-0.202	TLR10	toll like receptor 10
ILMN_1696704	0.3421	0.00163	-3.30634	-1.21786	-0.152	TLE4	transducin like enhancer of split 4
ILMN_1678619	0.4101	0.00619	2.84232	-2.35933	0.251	TKFC	triokinase and FMN cyclase
ILMN_1806037	0.3161	0.00122	3.40397	-0.96306	0.808	TK1	thymidine kinase 1
ILMN_1674662	0.2698	0.00042	3.74512	-0.03709	0.206	TICRR	TOPBP1 interacting checkpoint and replication regulator
ILMN_1796855	0.3161	0.00114	3.42439	-0.90916	0.412	TIAL1	TIA1 cytotoxic granule-associated RNA binding protein-like 1
ILMN_1717745	0.3161	0.00126	3.39367	-0.99019	0.34	TIAL1	TIA1 cytotoxic granule-associated RNA binding protein-like 1
ILMN_1771600	0.4295	0.00781	2.75718	-2.55532	0.0897	THAP7	THAP domain containing 7
ILMN_1707124	0.4246	0.00731	-2.78165	-2.49945	-0.942	TFPI	tissue factor pathway inhibitor
ILMN_1662619	0.4498	0.00989	-2.66855	-2.75459	-0.922	TFPI	tissue factor pathway inhibitor
ILMN_1653529	0.3939	0.0046	2.94932	-2.10688	0.303	TEX10	testis expressed 10
ILMN_1694847	0.3566	0.00298	3.10219	-1.73476	0.495	TERF1	telomeric repeat binding factor 1
ILMN_1654570	0.3982	0.00525	-2.90231	-2.21863	-0.406	TEKT1	tektin 1
ILMN_1706511	0.3432	0.00232	-3.18881	-1.51813	-0.401	TEF	TEF, PAR bZIP transcription factor
ILMN_2413041	0.2698	0.00047	3.70977	-0.13549	0.152	TEAD4	TEA domain transcription factor 4
ILMN_2391789	0.437	0.00832	2.73364	-2.60873	0.106	TDP1	tyrosyl-DNA phosphodiesterase 1
ILMN_1707005	0.3982	0.00521	2.90513	-2.21196	0.0725	TCF7	transcription factor 7 (T-cell specific, HMG-box)
ILMN_2414848	0.2698	0.000264	3.88942	0.36993	0.476	TBRG4	transforming growth factor beta regulator 4
ILMN_1783728	0.2698	0.000295	3.85482	0.27156	0.519	TBRG4	transforming growth factor beta regulator 4
ILMN_2390227	0.4394	0.00856	-2.72278	-2.63325	-0.352	TBC1D9B	TBC1 domain family member 9B
ILMN_1710434	0.44	0.00889	-2.70852	-2.66533	-0.466	TBC1D10C	TBC1 domain family member 10C
ILMN_1724407	0.3816	0.00408	2.99205	-2.00419	0.415	TACC3	transforming acidic coiled-coil containing protein 3
ILMN_1803745	0.44	0.00862	-2.72044	-2.63852	-0.336	SUOX	sulfite oxidase
ILMN_1673793	0.437	0.00826	2.73636	-2.60258	0.136	SUN3	Sad1 and UNC84 domain containing 3
ILMN_1766657	0.2998	0.000762	-3.55633	-0.55612	-0.641	STOM	stomatin
ILMN_1657796	0.3566	0.00294	3.1069	-1.72307	0.645	STMN1	stathmin 1
ILMN_1711383	0.3432	0.00234	-3.18568	-1.52603	-0.354	STK4	serine/threonine kinase 4
ILMN_1778213	0.4519	0.01	-2.66416	-2.76433	-0.178	STK33	serine/threonine kinase 33
ILMN_2413650	0.3366	0.00151	3.33179	-1.15192	0.509	STIL	SCL/TAL1 interrupting locus
ILMN_1755234	0.4392	0.00852	-2.72451	-2.62934	-0.41	SSH3	slingshot protein phosphatase 3
ILMN_1697469	0.4166	0.00672	-2.8124	-2.42871	-0.34	SRSF6	serine and arginine rich splicing factor 6
ILMN_1761996	0.3703	0.00384	-3.01356	-1.95212	-0.511	SRSF5	serine and arginine rich splicing factor 5
ILMN_2378868	0.4119	0.00632	-2.83501	-2.37634	-0.48	SRSF5	serine and arginine rich splicing factor 5
ILMN_1811820	0.4426	0.00929	2.69232	-2.70163	0.145	SRRM4	serine/arginine repetitive matrix 4
ILMN_1661337	0.3432	0.00217	3.21111	-1.46173	0.4	SRM	spermidine synthase
ILMN_1699525	0.4392	0.0085	-2.72557	-2.62696	-0.398	SRI	sorcin
ILMN_2400219	0.4417	0.0092	-2.69591	-2.69361	-0.448	SRI	sorcin
ILMN_1772241	0.3959	0.00481	2.93398	-2.1435	0.431	SQLE	squalene epoxidase
ILMN_1695357	0.4498	0.00991	2.66785	-2.75614	0.248	SPDL1	spindle apparatus coiled-coil protein 1
ILMN_2149400	0.3973	0.00499	2.92069	-2.1751	0.0849	SPC25	SPC25, NDC80 kinetochore complex component
ILMN_1687247	0.44	0.00877	-2.71374	-2.6536	-0.42	SPATA20	spermatogenesis associated 20
ILMN_1834497	0.2998	0.000741	3.56554	-0.5312	0.0802	SPATA17	spermatogenesis associated 17
ILMN_1769721	0.3432	0.00219	3.20731	-1.47136	0.145	SP6	Sp6 transcription factor
ILMN_2246882	0.3939	0.00462	-2.94813	-2.10974	-0.329	SP140	SP140 nuclear body protein
ILMN_1798615	0.4246	0.00737	2.77829	-2.50714	0.333	SOHLH2	spermatogenesis and oogenesis specific basic helix-loop-helix 2
ILMN_1697614	0.409	0.00609	2.84858	-2.34477	0.375	SNU13	SNU13 homolog, small nuclear ribonucleoprotein (U4/U6.U5)
ILMN_1715179	0.2698	0.000255	3.90007	0.40031	0.352	SNRPA1	small nuclear ribonucleoprotein polypeptide A'
ILMN_2107184	0.3432	0.0023	-3.19097	-1.51269	-0.376	SNRK	SNF related kinase
ILMN_2082762	0.3432	0.0021	3.22204	-1.43398	0.442	SNORD68	small nucleolar RNA, C/D box 68
ILMN_2209515	0.44	0.00875	2.71474	-2.65136	0.209	SNORD56	small nucleolar RNA, C/D box 56
ILMN_1680393	0.4246	0.00752	2.77092	-2.524	0.301	SNORD55	small nucleolar RNA, C/D box 55
ILMN_2157020	0.4475	0.00975	2.67393	-2.74264	0.186	SNORD48	small nucleolar RNA, C/D box 48
ILMN_1682402	0.383	0.00439	2.96648	-2.06578	0.382	SNORD46	small nucleolar RNA, C/D box 46
ILMN_1739086	0.3421	0.00173	3.2882	-1.26468	0.17	SNORD43	small nucleolar RNA, C/D box 43
ILMN_1684278	0.3566	0.003	3.09996	-1.74026	0.178	SNORD38A	small nucleolar RNA, C/D box 38A
ILMN_1666599	0.4246	0.00753	2.77044	-2.52509	0.122	SNORD30	small nucleolar RNA, C/D box 30
ILMN_1784328	0.4339	0.0081	2.74353	-2.58632	0.14	SNORD25	small nucleolar RNA, C/D box 25
ILMN_1787326	0.3432	0.00232	3.18791	-1.52042	0.178	SNORA65	small nucleolar RNA, H/ACA box 65
ILMN_1757370	0.3007	0.000886	-3.5077	-0.68723	-0.278	SMPD1	sphingomyelin phosphodiesterase 1
ILMN_1694759	0.4166	0.00666	-2.81597	-2.42046	-0.277	SMIM7	small integral membrane protein 7
ILMN_2296422	0.366	0.00349	3.04721	-1.8701	0.0611	SMC2	structural maintenance of chromosomes 2
ILMN_1748923	0.4401	0.00902	2.70332	-2.67701	0.141	SMC2	structural maintenance of chromosomes 2
ILMN_2309180	0.4246	0.00722	-2.78586	-2.48979	-0.523	SMARCD3	SWI/SNF related, matrix associated, actin dependent regulator of chromatin, subfamily d, member 3
ILMN_2403458	0.44	0.00866	2.7186	-2.64267	0.384	SMARCB1	SWI/SNF related, matrix associated, actin dependent regulator of chromatin, subfamily b, member 1
ILMN_1777637	0.3413	0.00159	-3.31479	-1.196	-0.286	SLFNL1	schlafen like 1
ILMN_2401457	0.3566	0.00303	3.0962	-1.74958	0.0662	SLC7A3	solute carrier family 7 member 3
ILMN_2184109	0.3432	0.00225	-3.19903	-1.49232	-1.18	SLC34A2	solute carrier family 34 member 2
ILMN_1719627	0.3421	0.00163	-3.30678	-1.21673	-0.685	SLC27A3	solute carrier family 27 member 3
ILMN_1854570	0.3007	0.000883	3.50886	-0.6841	0.105	SLC24A2	solute carrier family 24 member 2
ILMN_2115777	0.4062	0.00579	-2.86673	-2.30234	-0.0666	SLC16A11	solute carrier family 16 member 11
ILMN_1736816	0.3566	0.00287	3.11557	-1.70155	0.169	SKA3	spindle and kinetochore associated complex subunit 3
ILMN_1652693	0.4475	0.00974	2.67417	-2.74211	0.0681	SHH	sonic hedgehog
ILMN_1814790	0.3692	0.00361	-3.03561	-1.89844	-0.371	SHANK2	SH3 and multiple ankyrin repeat domains 2
ILMN_2404906	0.3161	0.00118	3.41421	-0.93606	0.158	SGO1	shugoshin 1
ILMN_1730825	0.416	0.00656	2.82142	-2.40785	0.143	SGO1	shugoshin 1
ILMN_2363361	0.3366	0.00154	3.3256	-1.16799	0.47	SFXN4	sideroflexin 4
ILMN_2206949	0.3053	0.000913	-3.49792	-0.71346	-2	SFTPC	surfactant protein C
ILMN_1689389	0.396	0.00488	2.92849	-2.15655	0.38	SF3B5	splicing factor 3b subunit 5
ILMN_1731644	0.3939	0.00461	-2.94889	-2.10792	-0.338	SETDB2	SET domain bifurcated 2
ILMN_1712400	0.4475	0.00976	-2.67338	-2.74385	-0.373	SERPINB6	serpin family B member 6
ILMN_1760049	0.3703	0.00378	-3.01882	-1.93933	-0.358	SERGEF	secretion regulating guanine nucleotide exchange factor
ILMN_1833458	0.325	0.00135	-3.36952	-1.05353	-0.0757	SEPT7-AS1	SEPT7 antisense RNA 1 (head to head)
ILMN_1715417	0.4246	0.00741	-2.77652	-2.51118	-0.144	SELP	selectin P
ILMN_1797822	0.4246	0.00754	-2.76987	-2.5264	-0.54	SEL1L3	SEL1L family member 3
ILMN_1763989	0.44	0.00875	-2.71463	-2.6516	-0.209	SEC63	SEC63 homolog, protein translocation regulator
ILMN_1752435	0.3432	0.00229	3.19232	-1.50928	0.204	SEC22C	SEC22 homolog C, vesicle trafficking protein
ILMN_1715991	0.3525	0.00267	-3.14068	-1.63899	-0.714	SDPR	serum deprivation response
ILMN_1772537	0.3432	0.00226	-3.19658	-1.49852	-1.25	SCTR	secretin receptor
ILMN_2324029	0.4067	0.00593	2.85799	-2.32279	0.147	SCRIB	scribbled planar cell polarity protein
ILMN_1655347	0.4319	0.008	-2.7481	-2.57596	-1.77	SCGB1A1	secretoglobin family 1A member 1
ILMN_1794230	0.4417	0.00919	2.69609	-2.69321	0.327	SCAND1	SCAN domain containing 1
ILMN_1702197	0.4119	0.00634	2.83393	-2.37886	0.579	SAPCD2	suppressor APC domain containing 2
ILMN_1658821	0.3366	0.00156	3.32231	-1.17653	0.378	SAMD1	sterile alpha motif domain containing 1
ILMN_1713636	0.3939	0.00466	-2.94523	-2.11666	-0.49	S100A6	S100 calcium binding protein A6
ILMN_1656540	0.3366	0.00151	3.33298	-1.14881	0.435	RUVBL1	RuvB like AAA ATPase 1
ILMN_1693108	0.4131	0.00638	2.83159	-2.38427	0.458	RUVBL1	RuvB like AAA ATPase 1
ILMN_1710522	0.437	0.00824	2.7373	-2.60045	0.0872	RUNX1T1	RUNX1 translocation partner 1
ILMN_1689212	0.3161	0.00123	-3.40003	-0.97343	-0.399	RSPH4A	radial spoke head 4 homolog A
ILMN_2068698	0.3828	0.00418	-2.98325	-2.02542	-0.183	RSPH4A	radial spoke head 4 homolog A
ILMN_1767253	0.3161	0.00128	3.38659	-1.00877	0.444	RRP12	ribosomal RNA processing 12 homolog
ILMN_1910120	0.437	0.00829	-2.73477	-2.60618	-0.257	RRN3P1	RRN3 homolog, RNA polymerase I transcription factor pseudogene 1
ILMN_2186137	0.4246	0.00745	-2.77451	-2.51578	-0.754	RRAD	RRAD, Ras related glycolysis inhibitor and calcium channel regulator
ILMN_1652736	0.4295	0.00786	-2.75478	-2.56078	-0.157	RPS6KA3	ribosomal protein S6 kinase A3
ILMN_1656625	0.4246	0.00742	-2.77615	-2.51205	-0.352	RPS24	ribosomal protein S24
ILMN_2108357	0.4119	0.00633	2.83431	-2.37797	0.712	RPL39L	ribosomal protein L39 like
ILMN_1749234	0.3631	0.00333	-3.06375	-1.82956	-0.166	RPL13AP17	ribosomal protein L13a pseudogene 17
ILMN_1716895	0.2998	0.000726	3.57218	-0.51318	0.582	RPA3	replication protein A3
ILMN_1811234	0.3703	0.00382	-3.01551	-1.94738	-0.7	ROS1	ROS proto-oncogene 1, receptor tyrosine kinase
ILMN_1797926	0.4052	0.00566	-2.87489	-2.28322	-0.111	ROBO2	roundabout guidance receptor 2
ILMN_1710723	0.44	0.00889	2.70851	-2.66536	0.0527	ROBO1	roundabout guidance receptor 1
ILMN_1691843	0.4513	0.00996	2.66588	-2.76051	0.266	RNPS1	RNA binding protein with serine rich domain 1
ILMN_2295346	0.4166	0.00671	2.81302	-2.42727	0.0589	RNLS	renalase, FAD dependent amine oxidase
ILMN_1677113	0.4015	0.00556	2.88146	-2.26778	0.219	RNF8	ring finger protein 8
ILMN_1762787	0.4417	0.00922	2.69489	-2.69589	0.331	RNF26	ring finger protein 26
ILMN_1798205	0.4376	0.00844	-2.72824	-2.62093	-0.0561	RNF222	ring finger protein 222
ILMN_1671565	0.3982	0.00516	-2.90834	-2.20438	-0.539	RNASET2	ribonuclease T2
ILMN_1790537	0.3432	0.00202	3.23528	-1.40028	0.596	RMI2	RecQ mediated genome instability 2
ILMN_1783469	0.3566	0.00308	3.091	-1.76242	0.421	RMDN1	regulator of microtubule dynamics 1
ILMN_1763763	0.409	0.00608	-2.84894	-2.34392	-0.287	RIPK3	receptor interacting serine/threonine kinase 3
ILMN_1757425	0.44	0.0088	-2.71272	-2.65589	-0.0698	RIMBP3	RIMS binding protein 3
ILMN_1807633	0.2451	0.000163	4.03679	0.79419	0.548	RIDA	reactive intermediate imine deaminase A homolog
ILMN_1727770	0.4246	0.00724	-2.78505	-2.49165	-0.0554	RGN	regucalcin
ILMN_2372698	0.4449	0.00953	-2.6827	-2.7231	-0.342	RGN	regucalcin
ILMN_1800787	0.3541	0.00277	-3.12787	-1.67095	-0.529	RFTN1	raftlin, lipid raft linker 1
ILMN_1784860	0.437	0.00835	2.73239	-2.61156	0.26	RFC3	replication factor C subunit 3
ILMN_1729611	0.3526	0.00269	3.13778	-1.64624	0.246	REEP4	receptor accessory protein 4
ILMN_2120210	0.3432	0.00234	-3.18459	-1.52879	-0.7	RCAN2	regulator of calcineurin 2
ILMN_1708537	0.3982	0.00541	2.89139	-2.2444	0.471	RBPJ	recombination signal binding protein for immunoglobulin kappa J region
ILMN_1806403	0.3703	0.00377	-3.02044	-1.93539	-0.471	RASL12	RAS like family 12
ILMN_1727045	0.3454	0.00246	-3.16875	-1.56867	-0.332	RASGRP3	RAS guanyl releasing protein 3
ILMN_1721457	0.3959	0.00485	2.93083	-2.15099	0.523	RANBP1	RAN binding protein 1
ILMN_1761782	0.383	0.00432	-2.97234	-2.0517	-0.326	RAMP3	receptor (G protein-coupled) activity modifying protein 3
ILMN_1699856	0.4414	0.00913	-2.69886	-2.687	-0.47	RALGDS	ral guanine nucleotide dissociation stimulator
ILMN_1722127	0.3566	0.00291	3.1101	-1.71513	0.174	RAD54B	RAD54 homolog B (S. cerevisiae)
ILMN_1760635	0.3006	0.000809	3.53724	-0.60772	0.317	RAD51C	RAD51 paralog C
ILMN_1670353	0.4062	0.00588	2.86143	-2.31474	0.437	RAD51AP1	RAD51 associated protein 1
ILMN_2257432	0.3566	0.00313	3.08524	-1.77665	0.0824	RAD51	RAD51 recombinase
ILMN_1748578	0.3566	0.00282	3.12112	-1.68775	0.619	RAD21	RAD21 cohesin complex component
ILMN_2077550	0.3432	0.00241	3.17536	-1.55204	0.48	RACGAP1	Rac GTPase activating protein 1
ILMN_1709795	0.44	0.00884	-2.71092	-2.65993	-0.608	RAC2	ras-related C3 botulinum toxin substrate 2 (rho family, small GTP binding protein Rac2)
ILMN_2255579	0.3982	0.00509	-2.91306	-2.19319	-0.498	RAB37	RAB37, member RAS oncogene family
ILMN_2052373	0.2997	0.000676	-3.59501	-0.45109	-0.906	RAB17	RAB17, member RAS oncogene family
ILMN_1788180	0.416	0.00659	-2.81975	-2.41172	-0.396	RAB13	RAB13, member RAS oncogene family
ILMN_1681467	0.3432	0.00232	-3.18882	-1.51812	-0.404	RAB11FIP4	RAB11 family interacting protein 4
ILMN_2411282	0.4417	0.00921	-2.6956	-2.6943	-0.613	QSOX1	quiescin sulfhydryl oxidase 1
ILMN_1686387	0.3432	0.00232	3.18776	-1.52078	0.208	PYCRL	pyrroline-5-carboxylate reductase-like
ILMN_2395092	0.2698	0.000563	3.65281	-0.29287	0.15	PYCR1	pyrroline-5-carboxylate reductase 1
ILMN_1681634	0.3432	0.00234	3.18583	-1.52567	0.391	PXMP2	peroxisomal membrane protein 2
ILMN_1799015	0.437	0.0084	2.72995	-2.61707	0.472	PXMP2	peroxisomal membrane protein 2
ILMN_2383300	0.3526	0.00268	-3.1384	-1.64469	-0.524	PTPRU	protein tyrosine phosphatase, receptor type U
ILMN_1657128	0.3566	0.0029	-3.11108	-1.7127	-0.297	PTPRU	protein tyrosine phosphatase, receptor type U
ILMN_1676305	0.309	0.000988	3.47256	-0.78123	0.134	PTK2	protein tyrosine kinase 2
ILMN_1795166	0.3585	0.00324	-3.07311	-1.80654	-0.431	PTH1R	parathyroid hormone 1 receptor
ILMN_2345016	0.3982	0.00528	2.90022	-2.22358	0.368	PTGES2	prostaglandin E synthase 2
ILMN_1795930	0.44	0.0089	-2.70831	-2.6658	-0.41	PTGER4	prostaglandin E receptor 4
ILMN_1688753	0.0724	1.04e-05	4.83473	3.21749	0.555	PTDSS1	phosphatidylserine synthase 1
ILMN_1671843	0.3432	0.00236	3.18211	-1.53505	0.351	PSRC1	proline and serine rich coiled-coil 1
ILMN_1789887	0.44	0.00874	-2.71512	-2.6505	-0.0608	PSPN	persephin
ILMN_1776105	0.44	0.00892	2.70761	-2.66737	0.417	PSPH	phosphoserine phosphatase
ILMN_1682098	0.4246	0.00757	2.7685	-2.52951	0.389	PSMA4	proteasome subunit alpha 4
ILMN_1806242	0.3566	0.00286	3.11578	-1.70103	0.101	PSD	pleckstrin and Sec7 domain containing
ILMN_1692938	0.2698	0.000508	3.68535	-0.20314	0.724	PSAT1	phosphoserine aminotransferase 1
ILMN_2400360	0.3982	0.00522	2.90429	-2.21395	0.0569	PRSS54	protease, serine 54
ILMN_2408179	0.2698	0.000575	3.64654	-0.3101	0.488	PRRC2A	proline rich coiled-coil 2A
ILMN_1760563	0.4475	0.00972	2.6752	-2.73981	0.342	PRRC2A	proline rich coiled-coil 2A
ILMN_1677509	0.3566	0.00299	3.10155	-1.73634	0.336	PRR7	proline rich 7 (synaptic)
ILMN_1782403	0.2698	0.000413	3.75036	-0.02247	0.453	PRR11	proline rich 11
ILMN_1769545	0.408	0.00604	2.85173	-2.33742	0.301	PRPF19	pre-mRNA processing factor 19
ILMN_1671928	0.3432	0.00238	-3.17936	-1.54197	-0.692	PROS1	protein S (alpha)
ILMN_1674390	0.3432	0.00211	3.22116	-1.43621	0.335	PRKAR1B	protein kinase cAMP-dependent type I regulatory subunit beta
ILMN_1780349	0.3762	0.00395	-3.0032	-1.97723	-0.676	PRG4	proteoglycan 4
ILMN_1728934	0.2698	0.000294	3.85568	0.27401	0.743	PRC1	protein regulator of cytokinesis 1
ILMN_1711493	0.4401	0.00898	-2.70482	-2.67363	-0.241	PRAM1	PML-RARA regulated adaptor molecule 1
ILMN_2359887	0.3421	0.0017	3.29314	-1.25194	0.212	PPP2R5D	protein phosphatase 2 regulatory subunit B'delta
ILMN_1780940	0.3692	0.00362	3.03429	-1.90167	0.333	PPP2R5D	protein phosphatase 2 regulatory subunit B'delta
ILMN_1732141	0.3432	0.00207	3.2272	-1.42086	0.0588	PPP1R8	protein phosphatase 1 regulatory subunit 8
ILMN_1659936	0.3673	0.00353	-3.04293	-1.88056	-0.468	PPP1R15A	protein phosphatase 1 regulatory subunit 15A
ILMN_2054392	0.2698	0.000276	3.87568	0.33081	0.501	PPIL1	peptidylprolyl isomerase like 1
ILMN_1864422	0.3827	0.00416	2.98552	-2.01995	0.2	POU2F1	POU class 2 homeobox 1
ILMN_1760667	0.4246	0.00752	-2.77089	-2.52406	-0.325	POLR3GL	RNA polymerase III subunit G like
ILMN_2197247	0.2698	0.000441	3.73033	-0.07832	0.459	POLR3A	RNA polymerase III subunit A
ILMN_1681837	0.3432	0.00206	3.22899	-1.4163	0.422	POLR3A	RNA polymerase III subunit A
ILMN_1746686	0.3432	0.00243	3.17295	-1.5581	0.293	POLR1C	RNA polymerase I subunit C
ILMN_1658221	0.3982	0.00532	2.89773	-2.22945	0.094	POLH	DNA polymerase eta
ILMN_1746252	0.2698	0.000374	3.78137	0.06434	0.486	POLD2	DAN polymerase delta 2, accessory subunit
ILMN_1725145	0.3421	0.00171	3.2918	-1.25541	0.118	POLA1	DNA polymerase alpha 1, catalytic subunit
ILMN_1751897	0.4242	0.00716	2.78909	-2.48238	0.0467	PM20D1	peptidase M20 domain containing 1
ILMN_1757338	0.3982	0.00505	-2.91638	-2.18533	-0.408	PLSCR4	phospholipid scramblase 4
ILMN_1736176	0.3703	0.00378	3.01932	-1.93812	0.219	PLK1	polo like kinase 1
ILMN_1795762	0.4177	0.00686	-2.8051	-2.44557	-0.66	PLEK	pleckstrin
ILMN_1709256	0.4208	0.00696	-2.79988	-2.45758	-0.0502	PLEC	plectin
ILMN_1815719	0.4145	0.00645	-2.82767	-2.39337	-0.491	PLCG2	phospholipase C gamma 2
ILMN_1724066	0.4166	0.00673	-2.81211	-2.42939	-0.437	PLCB2	phospholipase C beta 2
ILMN_1786601	0.44	0.00871	2.71622	-2.64802	0.351	PLAGL2	PLAG1 like zinc finger 2
ILMN_1810191	0.4166	0.00673	-2.81203	-2.42956	-0.528	PLA2G4C	phospholipase A2 group IVC
ILMN_1797184	0.4246	0.00728	2.78296	-2.49644	0.314	PKN3	protein kinase N3
ILMN_1766658	0.1885	7.34e-05	4.27382	1.49333	0.581	PKMYT1	protein kinase, membrane associated tyrosine/threonine 1
ILMN_2401436	0.3566	0.00287	3.11479	-1.70349	0.207	PKMYT1	protein kinase, membrane associated tyrosine/threonine 1
ILMN_2383383	0.383	0.00432	2.9723	-2.0518	0.472	PIR	pirin
ILMN_1748283	0.4401	0.00897	-2.70532	-2.67252	-0.592	PIM2	Pim-2 proto-oncogene, serine/threonine kinase
ILMN_1783645	0.4246	0.00742	-2.77595	-2.51249	-0.0738	PIK3R6	phosphoinositide-3-kinase regulatory subunit 6
ILMN_1685387	0.2698	0.00035	-3.80208	0.12253	-1.75	PIGR	polymeric immunoglobulin receptor
ILMN_1673529	0.3692	0.00366	-3.03089	-1.90996	-0.332	PHYKPL	5-phosphohydroxy-L-lysine phospho-lyase
ILMN_1776723	0.366	0.00351	-3.0452	-1.87501	-0.368	PHF11	PHD finger protein 11
ILMN_1696087	0.3692	0.00366	3.03093	-1.90985	0.367	PHB2	prohibitin 2
ILMN_1706841	0.3982	0.00525	2.90257	-2.21803	0.473	PGAM4	phosphoglycerate mutase family member 4
ILMN_2080611	0.44	0.00872	2.71609	-2.64832	0.237	PDSS1	prenyl (decaprenyl) diphosphate synthase, subunit 1
ILMN_1698912	0.3161	0.00119	3.41037	-0.9462	0.117	PDF	peptide deformylase (mitochondrial)
ILMN_1797684	0.3982	0.00534	2.89601	-2.23351	0.312	PDCD2	programmed cell death 2
ILMN_1802699	0.3566	0.00315	3.08298	-1.78224	0.0943	PCK2	phosphoenolpyruvate carboxykinase 2, mitochondrial
ILMN_1656574	0.3959	0.0048	2.93446	-2.14234	0.311	PCGF6	polycomb group ring finger 6
ILMN_1670383	0.3698	0.00373	3.02401	-1.92671	0.438	PCDH7	protocadherin 7
ILMN_1805132	0.3421	0.00166	3.30152	-1.23032	0.308	PCDH19	protocadherin 19
ILMN_1680782	0.3541	0.00277	3.12697	-1.67321	0.309	PATL1	PAT1 homolog 1, processing body mRNA decay factor
ILMN_2397954	0.366	0.0035	-3.04588	-1.87335	-0.509	PARP3	poly(ADP-ribose) polymerase family member 3
ILMN_2395692	0.3833	0.0044	2.96552	-2.06807	0.0527	PARK2	parkin RBR E3 ubiquitin protein ligase
ILMN_2410428	0.4246	0.00731	2.78154	-2.49971	0.0976	PARG	poly(ADP-ribose) glycohydrolase
ILMN_2316918	0.3816	0.00407	2.99345	-2.00081	0.394	PANK1	pantothenate kinase 1
ILMN_1722276	0.3939	0.00461	-2.94894	-2.10779	-0.4	PAFAH1B1	platelet activating factor acetylhydrolase 1b regulatory subunit 1
ILMN_1716488	0.416	0.00653	2.82311	-2.40395	0.476	PACS1	phosphofurin acidic cluster sorting protein 1
ILMN_1768284	0.4237	0.00714	-2.79027	-2.47967	-0.37	P2RY8	purinergic receptor P2Y8
ILMN_1664094	0.405	0.00565	-2.87559	-2.28157	-0.383	P2RY13	purinergic receptor P2Y13
ILMN_1772703	0.3432	0.00236	3.18203	-1.53525	0.221	OTUD6B	OTU domain containing 6B
ILMN_1731070	0.3541	0.00278	3.12628	-1.67492	0.215	ORC6	origin recognition complex subunit 6
ILMN_1727459	0.2698	0.000483	3.70145	-0.15855	0.227	ORC1	origin recognition complex subunit 1
ILMN_1735042	0.3703	0.00383	3.01457	-1.94967	0.0686	OR4N4	olfactory receptor family 4 subfamily N member 4
ILMN_1655713	0.3432	0.0024	3.17709	-1.54768	0.06	OR2M7	olfactory receptor family 2 subfamily M member 7
ILMN_1863920	0.3007	0.000887	-3.5073	-0.68829	-0.0662	OR10C1	olfactory receptor family 10 subfamily C member 1 (gene/pseudogene)
ILMN_2196984	0.032	1.31e-06	5.40408	5.04388	0.663	OIP5	Opa interacting protein 5
ILMN_1759277	0.0999	2.31e-05	4.60918	2.51361	0.243	OIP5	Opa interacting protein 5
ILMN_1671288	0.44	0.00859	2.72176	-2.63556	0.15	ODF2	outer dense fiber of sperm tails 2
ILMN_1654441	0.4295	0.00784	2.75574	-2.5586	0.551	OAT	ornithine aminotransferase
ILMN_1804834	0.4137	0.00642	2.82937	-2.38943	0.326	OARD1	O-acyl-ADP-ribose deacylase 1
ILMN_1726720	0.4301	0.00789	2.75313	-2.56453	0.556	NUSAP1	nucleolar and spindle associated protein 1
ILMN_1810560	0.4401	0.00893	-2.70703	-2.66868	-0.648	NUPR1	nuclear protein 1, transcriptional regulator
ILMN_2404688	0.4417	0.00917	-2.69692	-2.69135	-0.644	NUPR1	nuclear protein 1, transcriptional regulator
ILMN_1658695	0.3673	0.00354	3.04245	-1.88174	0.207	NUF2	NUF2, NDC80 kinetochore complex component
ILMN_1765499	0.4433	0.00933	2.69063	-2.70541	0.0568	NTAN1	N-terminal asparagine amidase
ILMN_1756623	0.437	0.00821	2.73842	-2.59792	0.0577	NT5C1B	5'-nucleotidase, cytosolic IB
ILMN_1665319	0.3989	0.00548	2.88644	-2.25606	0.243	NRTN	neurturin
ILMN_1775759	0.383	0.00427	2.97621	-2.04238	0.269	NRAS	neuroblastoma RAS viral oncogene homolog
ILMN_2312587	0.4177	0.00685	-2.80534	-2.445	-0.0482	NRAP	nebulin related anchoring protein
ILMN_1779897	0.4463	0.00963	-2.67862	-2.73221	-0.0877	NPR1	natriuretic peptide receptor 1
ILMN_2110252	0.2698	0.000276	3.87587	0.33135	0.679	NPM3	nucleophosmin/nucleoplasmin 3
ILMN_1724194	0.3703	0.00385	-3.01296	-1.95358	-0.489	NPEPL1	aminopeptidase-like 1
ILMN_2184640	0.3006	0.000813	3.53555	-0.61229	0.447	NOLC1	nucleolar and coiled-body phosphoprotein 1
ILMN_2162253	0.4062	0.00579	2.8667	-2.30242	0.924	NMU	neuromedin U
ILMN_2062620	0.3982	0.00545	2.88905	-2.24992	0.111	NMT2	N-myristoyltransferase 2
ILMN_1784783	0.44	0.00892	-2.70759	-2.66744	-0.258	NME5	NME/NM23 family member 5
ILMN_1693430	0.4101	0.00624	2.83989	-2.36501	0.228	NME1-NME2	NME1-NME2 readthrough
ILMN_2310896	0.383	0.00439	-2.96653	-2.06564	-0.306	NLRP3	NLR family pyrin domain containing 3
ILMN_1715864	0.3939	0.00464	-2.94681	-2.11287	-0.679	NHS	NHS actin remodeling regulator
ILMN_2399328	0.3959	0.00483	2.93181	-2.14866	0.479	NELFB	negative elongation factor complex member B
ILMN_2051373	0.3692	0.00368	3.02854	-1.9157	0.706	NEK2	NIMA related kinase 2
ILMN_1653822	0.4119	0.00628	2.83731	-2.371	0.19	NEK2	NIMA related kinase 2
ILMN_1760741	0.4417	0.00917	2.69718	-2.69076	0.397	NDUFA9	NADH:ubiquinone oxidoreductase subunit A9
ILMN_1670535	0.3525	0.00261	-3.14743	-1.62214	-0.231	NDRG2	NDRG family member 2
ILMN_2361603	0.3937	0.00458	-2.95099	-2.10288	-0.372	NDRG2	NDRG family member 2
ILMN_1664511	0.4246	0.00738	2.77785	-2.50816	0.247	NDC80	NDC80, kinetochore complex component
ILMN_1749930	0.3923	0.00452	2.95604	-2.0908	0.266	NDC1	NDC1 transmembrane nucleoporin
ILMN_1785005	0.2998	0.00075	-3.56162	-0.54181	-0.394	NCF4	neutrophil cytosolic factor 4
ILMN_1796642	0.397	0.00494	-2.92426	-2.16662	-0.251	NCF2	neutrophil cytosolic factor 2
ILMN_1751444	0.3161	0.00122	3.40324	-0.96498	0.508	NCAPG	non-SMC condensin I complex subunit G
ILMN_1775008	0.3566	0.00286	3.11642	-1.69944	0.486	NCAPD2	non-SMC condensin I complex subunit D2
ILMN_2109416	0.3816	0.00409	-2.99138	-2.00581	-0.696	NAPSB	napsin B aspartic peptidase, pseudogene
ILMN_1784040	0.4009	0.00554	-2.88283	-2.26457	-1.15	NAPSA	napsin A aspartic peptidase
ILMN_2315569	0.4062	0.00584	-2.86354	-2.30981	-0.286	N6AMT1	N-6 adenine-specific DNA methyltransferase 1 (putative)
ILMN_2344650	0.3982	0.00543	-2.89015	-2.24731	-0.321	N4BP2L1	NEDD4 binding protein 2 like 1
ILMN_1799487	0.3982	0.00544	-2.88952	-2.24882	-0.332	N4BP2L1	NEDD4 binding protein 2 like 1
ILMN_1764764	0.4066	0.00592	-2.85875	-2.32101	-0.427	MUM1	melanoma associated antigen (mutated) 1
ILMN_1742569	0.3432	0.00231	3.18978	-1.5157	0.403	MTPAP	mitochondrial poly(A) polymerase
ILMN_1674706	0.3827	0.00414	2.98666	-2.0172	0.607	MTHFD2	methylenetetrahydrofolate dehydrogenase (NADP+ dependent) 2, methenyltetrahydrofolate cyclohydrolase
ILMN_1785324	0.3937	0.00457	2.9522	-2.1	0.24	MTHFD1	methylenetetrahydrofolate dehydrogenase, cyclohydrolase and formyltetrahydrofolate synthetase 1
ILMN_1774028	0.3703	0.0038	3.01719	-1.94331	0.527	MTFR1	mitochondrial fission regulator 1
ILMN_1657898	0.4392	0.00853	2.72425	-2.62994	0.293	MTFP1	mitochondrial fission process 1
ILMN_2388517	0.3566	0.00308	3.09113	-1.76212	0.0506	MTERF2	mitochondrial transcription termination factor 2
ILMN_1703006	0.4246	0.00725	2.7845	-2.49293	0.261	MTCH1	mitochondrial carrier 1
ILMN_2228180	0.4119	0.0063	-2.83596	-2.37413	-0.353	MSRA	methionine sulfoxide reductase A
ILMN_2373285	0.4311	0.00794	-2.75079	-2.56987	-0.205	MSR1	macrophage scavenger receptor 1
ILMN_1675708	0.4475	0.00975	2.67412	-2.74222	0.109	MSH5	mutS homolog 5
ILMN_1737413	0.4525	0.01	2.6625	-2.76802	0.131	MSH2	mutS homolog 2
ILMN_1797731	0.4246	0.00748	-2.77293	-2.5194	-0.597	MS4A6A	membrane spanning 4-domains A6A
ILMN_1721035	0.4329	0.00804	-2.74633	-2.57998	-0.627	MS4A6A	membrane spanning 4-domains A6A
ILMN_1741264	0.383	0.00435	2.96944	-2.05865	0.441	MRPS33	mitochondrial ribosomal protein S33
ILMN_1802553	0.3566	0.003	3.10001	-1.74015	0.428	MRPS24	mitochondrial ribosomal protein S24
ILMN_1815043	0.3745	0.00391	3.00692	-1.96822	0.368	MRPS2	mitochondrial ribosomal protein S2
ILMN_1721337	0.3631	0.00332	3.06463	-1.82739	0.314	MRPS18B	mitochondrial ribosomal protein S18B
ILMN_2097421	0.3575	0.0032	3.07738	-1.79604	0.368	MRPL51	mitochondrial ribosomal protein L51
ILMN_1699603	0.3982	0.00517	2.90749	-2.20638	0.437	MRPL12	mitochondrial ribosomal protein L12
ILMN_2316540	0.4246	0.00742	2.77587	-2.51268	0.374	MRPL11	mitochondrial ribosomal protein L11
ILMN_1672428	0.1342	4.13e-05	4.44197	2.00067	0.0762	MROH6	maestro heat like repeat family member 6
ILMN_1693702	0.3692	0.00371	3.02596	-1.92197	0.205	MRFAP1L1	Morf4 family associated protein 1 like 1
ILMN_1687501	0.437	0.00825	-2.73662	-2.60199	-0.514	MOXD1	monooxygenase DBH like 1
ILMN_1798288	0.4417	0.00923	-2.69457	-2.69661	-0.439	MOB3C	MOB kinase activator 3C
ILMN_2174394	0.4119	0.0063	2.8364	-2.37311	0.277	MMS19	MMS19 homolog, cytosolic iron-sulfur assembly component
ILMN_1715788	0.2451	0.000144	-4.07384	0.90217	-0.114	MMRN2	multimerin 2
ILMN_1660114	0.4062	0.00575	-2.86943	-2.29603	-0.204	MMRN1	multimerin 1
ILMN_1795342	0.3959	0.00473	-2.93975	-2.12974	-0.934	MLPH	melanophilin
ILMN_1671885	0.0999	1.95e-05	4.65674	2.66093	0.622	MLF2	myeloid leukemia factor 2
ILMN_1657495	0.437	0.00818	-2.73982	-2.59475	-0.362	MLEC	malectin
ILMN_1734827	0.2451	0.000127	4.11001	1.00805	0.338	MKI67	marker of proliferation Ki-67
ILMN_1653453	0.4062	0.00578	2.86742	-2.30072	0.0707	MID1	midline 1
ILMN_1687387	0.366	0.00345	3.05169	-1.85915	0.0591	MGST1	microsomal glutathione S-transferase 1
ILMN_1764577	0.2481	0.000173	-4.0184	0.74081	-0.466	MFNG	MFNG O-fucosylpeptide 3-beta-N-acetylglucosaminyltransferase
ILMN_1766914	0.4066	0.00592	-2.85856	-2.32145	-0.699	MFAP4	microfibrillar associated protein 4
ILMN_2280731	0.3982	0.00538	2.89339	-2.23968	0.198	METTL23	methyltransferase like 23
ILMN_2276811	0.2642	0.000211	-3.95762	0.56523	-0.28	METTL17	methyltransferase like 17
ILMN_2340877	0.2778	0.000609	3.62808	-0.36075	0.275	MEN1	menin 1
ILMN_2212909	0.3091	0.000995	3.47029	-0.78729	0.693	MELK	maternal embryonic leucine zipper kinase
ILMN_1731184	0.4263	0.00768	2.76337	-2.54123	0.42	MELK	maternal embryonic leucine zipper kinase
ILMN_1660462	0.416	0.00653	-2.82292	-2.4044	-0.409	MCOLN2	mucolipin 2
ILMN_1704702	0.437	0.00836	2.73176	-2.61298	0.116	MCM7	minichromosome maintenance complex component 7
ILMN_1815169	0.4295	0.00782	2.75678	-2.55623	0.47	MCM5	minichromosome maintenance complex component 5
ILMN_2412860	0.2698	0.000358	3.795	0.10262	0.592	MCM4	minichromosome maintenance complex component 4
ILMN_1737205	0.4246	0.00746	2.77418	-2.51654	0.586	MCM4	minichromosome maintenance complex component 4
ILMN_1806818	0.3366	0.00155	3.32371	-1.17289	0.414	MCM3	minichromosome maintenance complex component 3
ILMN_1681503	0.3432	0.0023	3.19169	-1.51088	0.652	MCM2	minichromosome maintenance complex component 2
ILMN_2413898	0.2698	0.000518	3.67965	-0.21887	0.544	MCM10	minichromosome maintenance 10 replication initiation factor
ILMN_1745513	0.3703	0.00382	3.01506	-1.94848	0.319	MCAT	malonyl-CoA-acyl carrier protein transacylase
ILMN_2409793	0.3432	0.002	3.23882	-1.39125	0.401	MAZ	MYC associated zinc finger protein
ILMN_1815107	0.433	0.00806	-2.74556	-2.58173	-0.285	MATR3	matrin 3
ILMN_1665943	0.3982	0.0052	-2.90585	-2.21025	-0.486	MAP4K1	mitogen-activated protein kinase kinase kinase kinase 1
ILMN_1727360	0.383	0.00421	-2.9814	-2.02989	-0.348	MAOB	monoamine oxidase B
ILMN_1713807	0.3215	0.00133	-3.37479	-1.03972	-0.385	MAN1C1	mannosidase alpha class 1C member 1
ILMN_1739798	0.3167	0.0013	3.38305	-1.01806	0.445	MALSU1	mitochondrial assembly of ribosomal large subunit 1
ILMN_1713985	0.3982	0.00519	2.90608	-2.20971	0.368	MAF1	MAF1 homolog, negative regulator of RNA polymerase III
ILMN_1743583	0.3692	0.00361	-3.03544	-1.89886	-0.29	MADD	MAP kinase activating death domain
ILMN_1777564	0.3432	0.00188	3.2595	-1.33839	0.538	MAD2L1	MAD2 mitotic arrest deficient-like 1 (yeast)
ILMN_2112460	0.3982	0.00513	2.91075	-2.19865	0.0808	MAD2L1	MAD2 mitotic arrest deficient-like 1 (yeast)
ILMN_2358074	0.3973	0.00496	2.9228	-2.17008	0.123	MAD1L1	MAD1 mitotic arrest deficient like 1
ILMN_1815205	0.3959	0.0048	-2.93407	-2.14328	-1.18	LYZ	lysozyme
ILMN_2210753	0.3982	0.00544	-2.88949	-2.24888	-0.105	LYVE1	lymphatic vessel endothelial hyaluronan receptor 1
ILMN_1807825	0.3703	0.00377	-3.02025	-1.93587	-0.679	LY86	lymphocyte antigen 86
ILMN_2376205	0.2451	0.000156	-4.04956	0.83135	-1.06	LTB	lymphotoxin beta
ILMN_2376204	0.2451	0.000166	-4.03105	0.77753	-0.846	LTB	lymphotoxin beta
ILMN_1759772	0.4414	0.00911	-2.69947	-2.68563	-0.432	LRRC56	leucine rich repeat containing 56
ILMN_1774389	0.3959	0.00476	-2.93758	-2.1349	-0.317	LRRC36	leucine rich repeat containing 36
ILMN_1734552	0.3413	0.00161	3.31191	-1.20346	0.0706	LRRC20	leucine rich repeat containing 20
ILMN_1715616	0.383	0.00428	2.97499	-2.04533	0.343	LRR1	leucine rich repeat protein 1
ILMN_1742789	0.4177	0.00685	-2.80539	-2.44489	-0.405	LPXN	leupaxin
ILMN_1839019	0.3161	0.00116	-3.4189	-0.92368	-0.481	LPP	LIM domain containing preferred translocation partner in lipoma
ILMN_1651254	0.366	0.0035	-3.04664	-1.87149	-0.41	LPP	LIM domain containing preferred translocation partner in lipoma
ILMN_1702171	0.4366	0.00816	-2.74082	-2.59248	-0.825	LPCAT1	lysophosphatidylcholine acyltransferase 1
ILMN_2179083	0.4442	0.00943	-2.68646	-2.71472	-0.812	LOXL4	lysyl oxidase like 4
ILMN_1708363	0.437	0.00841	2.72955	-2.61797	0.077	LOXL1	lysyl oxidase like 1
ILMN_1856993	0.4236	0.00708	2.79341	-2.47246	0.0511	LOC728084	uncharacterized LOC728084
ILMN_2198893	0.3566	0.00303	3.09611	-1.74979	0.459	LOC407835	mitogen-activated protein kinase kinase 2 pseudogene
ILMN_1764029	0.2698	0.000494	-3.69462	-0.17749	-0.211	LOC339059	uncharacterized LOC339059
ILMN_1853834	0.3432	0.00222	3.20298	-1.48233	0.0485	LOC338694	uncharacterized LOC338694
ILMN_1878506	0.366	0.0035	3.04645	-1.87196	0.0512	LOC286087	uncharacterized LOC286087
ILMN_1843259	0.4246	0.00747	2.77341	-2.5183	0.0716	LOC105370068	uncharacterized LOC105370068
ILMN_1916599	0.3827	0.00417	2.9843	-2.02291	0.0828	LOC100133985	uncharacterized LOC100133985
ILMN_1668249	0.4295	0.00781	-2.75692	-2.55591	-0.208	LMF1	lipase maturation factor 1
ILMN_1754969	0.3982	0.00541	-2.89117	-2.24492	-0.448	LMCD1	LIM and cysteine rich domains 1
ILMN_1903528	0.383	0.00424	2.97863	-2.03656	0.0632	LINC00445	long intergenic non-protein coding RNA 445
ILMN_1760493	0.4246	0.00737	-2.77866	-2.5063	-0.238	LIMS2	LIM zinc finger domain containing 2
ILMN_2064860	0.383	0.00421	2.98116	-2.03047	0.552	LGALS7B	galectin 7B
ILMN_2241825	0.3295	0.0014	3.35695	-1.08637	0.0639	LDB3	LIM domain binding 3
ILMN_1800697	0.3823	0.00412	-2.98874	-2.01218	-0.493	LDB2	LIM domain binding 2
ILMN_2336186	0.4101	0.0062	2.84211	-2.35982	0.327	LCMT1	leucine carboxyl methyltransferase 1
ILMN_1688452	0.4475	0.00967	2.6769	-2.73602	0.302	LCMT1	leucine carboxyl methyltransferase 1
ILMN_1653282	0.4237	0.00714	2.78999	-2.48033	0.0521	LCE2A	late cornified envelope 2A
ILMN_1768969	0.437	0.00837	2.73131	-2.61399	0.268	LBR	lamin B receptor
ILMN_1696921	0.4236	0.00706	2.79422	-2.47061	0.0529	LATS1	large tumor suppressor kinase 1
ILMN_1752968	0.3959	0.00474	-2.9387	-2.13223	-0.507	LAMB2	laminin subunit beta 2
ILMN_1716822	0.4246	0.00737	-2.77855	-2.50655	-0.0492	KRTAP9-2	keratin associated protein 9-2
ILMN_2112942	0.3432	0.00195	-3.24735	-1.36948	-0.0589	KRTAP6-1	keratin associated protein 6-1
ILMN_1730848	0.4246	0.0076	2.76739	-2.53206	0.133	KRT18	keratin 18
ILMN_1652008	0.3432	0.00227	3.19618	-1.49953	0.245	KNSTRN	kinetochore localized astrin/SPAG5 binding protein
ILMN_2079655	0.4101	0.00623	-2.84031	-2.36402	-0.507	KLRB1	killer cell lectin like receptor B1
ILMN_1735930	0.4062	0.00576	-2.86859	-2.29799	-0.608	KLF2	Kruppel like factor 2
ILMN_2222008	0.3432	0.00225	3.1989	-1.49264	0.604	KIFC1	kinesin family member C1
ILMN_1799667	0.3432	0.00202	3.23507	-1.40081	0.384	KIF4A	kinesin family member 4A
ILMN_1685916	0.4246	0.00758	2.76797	-2.53072	0.471	KIF2C	kinesin family member 2C
ILMN_1811472	0.2698	0.00026	3.89403	0.38308	0.363	KIF23	kinesin family member 23
ILMN_1695658	0.3421	0.00175	3.28435	-1.2746	0.564	KIF20A	kinesin family member 20A
ILMN_2143155	0.2698	0.000388	3.76969	0.03161	0.482	KIF11	kinesin family member 11
ILMN_1794539	0.2698	0.000418	3.74713	-0.03149	0.471	KIF11	kinesin family member 11
ILMN_2158003	0.4449	0.00952	-2.68282	-2.72283	-0.575	KIAA1683	KIAA1683
ILMN_1813635	0.3295	0.00139	3.35973	-1.07912	0.424	KIAA1429	KIAA1429
ILMN_2285996	0.3366	0.00156	3.32279	-1.17527	0.699	KIAA0101	KIAA0101
ILMN_1781537	0.4062	0.00587	2.86218	-2.31301	0.0671	KDM1B	lysine demethylase 1B
ILMN_1724293	0.4236	0.00711	2.79193	-2.47587	0.513	KDELR2	KDEL endoplasmic reticulum protein retention receptor 2
ILMN_1858612	0.36	0.00328	3.06931	-1.8159	0.0561	KCNK9	potassium two pore domain channel subfamily K member 9
ILMN_1717702	0.3989	0.00548	-2.8865	-2.25592	-0.309	KCNK17	potassium two pore domain channel subfamily K member 17
ILMN_1787948	0.3525	0.00258	3.1524	-1.6097	0.0655	KCNIP4	potassium voltage-gated channel interacting protein 4
ILMN_2047618	0.3428	0.00179	-3.27582	-1.29654	-0.0856	KCNE1	potassium voltage-gated channel subfamily E regulatory subunit 1
ILMN_1792125	0.3566	0.00314	3.08431	-1.77895	0.0562	KCNA2	potassium voltage-gated channel subfamily A member 2
ILMN_1692896	0.3525	0.00265	3.14253	-1.63438	0.26	JMJD4	jumonji domain containing 4
ILMN_1778723	0.3939	0.00462	-2.94767	-2.11084	-0.534	JAML	junction adhesion molecule like
ILMN_1781099	0.3432	0.00191	3.25487	-1.35025	0.339	ISY1	ISY1 splicing factor homolog
ILMN_2405264	0.4417	0.00919	2.69613	-2.69312	0.0718	ISM2	isthmin 2
ILMN_1751171	0.3144	0.00104	3.45656	-0.82387	0.37	IRF2BP1	interferon regulatory factor 2 binding protein 1
ILMN_1689220	0.3161	0.00117	3.41624	-0.9307	0.215	IQCE	IQ motif containing E
ILMN_1795388	0.3007	0.000871	3.51317	-0.67254	0.149	INSM2	INSM transcriptional repressor 2
ILMN_1744212	0.383	0.00433	-2.97133	-2.05413	-0.463	INPP5D	inositol polyphosphate-5-phosphatase D
ILMN_1781149	0.2698	0.00038	-3.77646	0.05057	-1.02	INMT	indolethylamine N-methyltransferase
ILMN_2355738	0.3432	0.00194	3.24918	-1.3648	0.33	INCENP	inner centromere protein
ILMN_1797631	0.3161	0.00113	3.42927	-0.89627	0.055	IL4I1	interleukin 4 induced 1
ILMN_1804901	0.383	0.00427	2.97613	-2.04257	0.417	IL36RN	interleukin 36 receptor antagonist
ILMN_1684349	0.4094	0.00612	-2.84696	-2.34854	-0.447	IL2RB	interleukin 2 receptor subunit beta
ILMN_1652825	0.4056	0.00569	-2.87299	-2.28768	-0.43	IL10RA	interleukin 10 receptor subunit alpha
ILMN_1807423	0.308	0.000964	3.48046	-0.76017	1.04	IGF2BP3	insulin like growth factor 2 mRNA binding protein 3
ILMN_1655504	0.3566	0.00293	-3.10803	-1.72027	-0.114	IFT81	intraflagellar transport 81
ILMN_1811636	0.3982	0.00545	-2.88874	-2.25065	-0.651	IFT57	intraflagellar transport 57
ILMN_1752923	0.3566	0.00314	-3.08403	-1.77965	-0.363	IFNAR1	interferon alpha and beta receptor subunit 1
ILMN_1673352	0.416	0.00655	-2.82201	-2.40648	-0.513	IFITM2	interferon induced transmembrane protein 2
ILMN_1700584	0.3798	0.00403	-2.99631	-1.99391	-0.241	IER2	immediate early response 2
ILMN_1763297	0.2698	0.000221	3.94311	0.52352	0.0795	ICE1	interactor of little elongation complex ELL subunit 1
ILMN_1673649	0.44	0.00861	2.72049	-2.6384	0.446	HYOU1	hypoxia up-regulated 1
ILMN_1747078	0.3982	0.00513	2.91028	-2.19978	0.241	HYLS1	HYLS1, centriolar and ciliogenesis associated
ILMN_1747204	0.3541	0.00273	3.13295	-1.65829	0.311	HTRA2	HtrA serine peptidase 2
ILMN_1779855	0.44	0.00884	-2.7109	-2.65999	-0.921	HSD17B6	hydroxysteroid 17-beta dehydrogenase 6
ILMN_1764850	0.44	0.00889	-2.70892	-2.66444	-0.447	HPCAL1	hippocalcin like 1
ILMN_1781942	0.2698	0.000349	3.80312	0.12547	0.492	HMMR	hyaluronan mediated motility receptor
ILMN_2409220	0.2698	0.000512	3.68319	-0.2091	0.521	HMMR	hyaluronan mediated motility receptor
ILMN_2311537	0.2698	0.000257	3.8977	0.39354	0.917	HMGA1	high mobility group AT-hook 1
ILMN_2066066	0.3566	0.00311	-3.08735	-1.77145	-0.776	HLA-DRB6	major histocompatibility complex, class II, DR beta 6 (pseudogene)
ILMN_1661266	0.3432	0.00199	-3.24071	-1.38645	-1.18	HLA-DQB1	major histocompatibility complex, class II, DQ beta 1
ILMN_1703906	0.3692	0.0036	3.0367	-1.89579	0.493	HJURP	Holliday junction recognition protein
ILMN_2353697	0.3692	0.00368	3.02882	-1.915	0.263	HINFP	histone H4 transcription factor
ILMN_1760985	0.4155	0.0065	2.82495	-2.39969	0.0671	HFE2	hemochromatosis type 2 (juvenile)
ILMN_1741180	0.44	0.00874	-2.715	-2.65077	-0.507	HEXDC	hexosaminidase D
ILMN_1702265	0.2451	0.000149	-4.06375	0.87271	-0.502	HDHD2	haloacid dehalogenase like hydrolase domain containing 2
ILMN_1765621	0.4392	0.00853	2.72416	-2.63014	0.344	HDGF	hepatoma-derived growth factor
ILMN_1792323	0.2698	0.000567	-3.6508	-0.29839	-0.539	HDC	histidine decarboxylase
ILMN_1791771	0.4283	0.00773	-2.76088	-2.54691	-0.446	HCK	HCK proto-oncogene, Src family tyrosine kinase
ILMN_1772731	0.4311	0.00793	-2.75157	-2.56807	-0.455	HAGH	hydroxyacylglutathione hydrolase
ILMN_1737041	0.383	0.00425	-2.97751	-2.03925	-0.903	HABP2	hyaluronan binding protein 2
ILMN_1721136	0.4301	0.00789	-2.75338	-2.56396	-0.32	H6PD	hexose-6-phosphate dehydrogenase/glucose 1-dehydrogenase
ILMN_1785756	0.0452	3.7e-06	5.12091	4.12765	0.744	H2AFX	H2A histone family member X
ILMN_2200331	0.1032	2.75e-05	4.55895	2.35869	0.416	H2AFX	H2A histone family member X
ILMN_1773964	0.4481	0.0098	2.67215	-2.74659	0.337	H1FX	H1 histone family member X
ILMN_1742577	0.4062	0.00589	2.86092	-2.31595	0.443	GTPBP4	GTP binding protein 4
ILMN_1811378	0.4062	0.00587	2.86177	-2.31396	0.0876	GTPBP1	GTP binding protein 1
ILMN_1655921	0.408	0.00598	2.85486	-2.33009	0.301	GTF2E1	general transcription factor IIE subunit 1
ILMN_1668134	0.3982	0.00509	2.91366	-2.19176	0.621	GSTM1	glutathione S-transferase mu 1
ILMN_1762255	0.3982	0.00526	2.90183	-2.21978	0.506	GSTM1	glutathione S-transferase mu 1
ILMN_1730101	0.4319	0.00799	-2.74851	-2.57503	-0.523	GSPT2	G1 to S phase transition 2
ILMN_1670817	0.4295	0.00785	2.75492	-2.56047	0.345	GRPEL1	GrpE like 1, mitochondrial
ILMN_2353030	0.4417	0.00916	-2.69756	-2.68991	-0.0507	GRAP	GRB2-related adaptor protein
ILMN_2102201	0.4009	0.00554	2.88254	-2.26524	0.0523	GPR19	G protein-coupled receptor 19
ILMN_1684227	0.4475	0.00969	-2.67634	-2.73727	-0.0839	GPR146	G protein-coupled receptor 146
ILMN_1742782	0.3348	0.00143	3.35006	-1.10437	0.125	GPANK1	G-patch domain and ankyrin repeats 1
ILMN_1728107	0.308	0.000972	-3.47781	-0.76724	-0.357	GNG7	G protein subunit gamma 7
ILMN_1720114	0.3432	0.00187	3.26169	-1.33279	0.465	GMNN	geminin, DNA replication inhibitor
ILMN_1711617	0.3432	0.00223	-3.20194	-1.48495	-0.51	GMFG	glia maturation factor gamma
ILMN_1670532	0.3161	0.00106	3.44847	-0.84536	0.383	GMCL1	germ cell-less, spermatogenesis associated 1
ILMN_2194627	0.4166	0.00664	2.81695	-2.4182	0.343	GMCL1	germ cell-less, spermatogenesis associated 1
ILMN_2188722	0.3432	0.00201	-3.2369	-1.39616	-1	GLS	glutaminase
ILMN_1771962	0.3982	0.00509	2.9136	-2.19192	0.282	GLI3	GLI family zinc finger 3
ILMN_1915711	0.3982	0.00511	2.91185	-2.19605	0.0486	GIT2	GIT ArfGAP 2
ILMN_1754272	0.4261	0.00765	2.76483	-2.53789	0.315	GINS3	GINS complex subunit 3
ILMN_1809590	0.3982	0.00537	2.89438	-2.23736	0.623	GINS2	GINS complex subunit 2
ILMN_1747305	0.3525	0.00267	-3.13975	-1.64133	-0.321	GIMAP8	GTPase, IMAP family member 8
ILMN_1776678	0.396	0.00489	-2.92749	-2.15893	-0.486	GIMAP7	GTPase, IMAP family member 7
ILMN_1769383	0.4442	0.00943	-2.68671	-2.71417	-0.44	GIMAP5	GTPase, IMAP family member 5
ILMN_1696380	0.4062	0.00575	-2.86914	-2.29669	-0.179	GHRL	ghrelin/obestatin prepropeptide
ILMN_1681754	0.3541	0.00274	3.13156	-1.66175	0.694	GGH	gamma-glutamyl hydrolase
ILMN_1701724	0.3973	0.00497	2.92182	-2.1724	0.477	GET4	golgi to ER traffic protein 4
ILMN_2364088	0.3783	0.00401	-2.99857	-1.98845	-0.239	GEMIN8	gem nuclear organelle associated protein 8
ILMN_2344002	0.4101	0.00621	2.84113	-2.3621	0.296	GEMIN2	gem nuclear organelle associated protein 2
ILMN_2188862	0.3982	0.00538	-2.8932	-2.24015	-1.11	GDF15	growth differentiation factor 15
ILMN_1730575	0.4311	0.00797	2.7496	-2.57255	0.583	GCLC	glutamate-cysteine ligase catalytic subunit
ILMN_1694472	0.3432	0.0023	3.19175	-1.51073	0.0703	GCK	glucokinase
ILMN_2098418	0.4062	0.00586	2.86261	-2.312	0.373	GATSL3	GATS protein like 3
ILMN_2038778	0.3421	0.00176	3.28089	-1.2835	0.527	GAPDH	glyceraldehyde-3-phosphate dehydrogenase
ILMN_1802252	0.3432	0.00242	3.17368	-1.55627	0.531	GAPDH	glyceraldehyde-3-phosphate dehydrogenase
ILMN_1343295	0.3692	0.00359	3.03759	-1.89362	0.534	GAPDH	glyceraldehyde-3-phosphate dehydrogenase
ILMN_1794552	0.4101	0.00616	2.84438	-2.35454	0.164	GAP43	growth associated protein 43
ILMN_1804351	0.4492	0.00985	2.66996	-2.75145	0.374	FZD7	frizzled class receptor 7
ILMN_2163906	0.4263	0.00767	2.76353	-2.54086	0.0661	FUT10	fucosyltransferase 10
ILMN_1752728	0.2698	0.000471	-3.70951	-0.13619	-0.685	FUCA1	fucosidase, alpha-L- 1, tissue
ILMN_1730670	0.4246	0.0073	-2.78226	-2.49805	-0.481	FSTL3	follistatin like 3
ILMN_1700081	0.416	0.00656	2.82119	-2.40839	0.422	FST	follistatin
ILMN_1716246	0.3421	0.00171	-3.29063	-1.25843	-0.542	FRZB	frizzled-related protein
ILMN_1768049	0.3692	0.00368	-3.02871	-1.91527	-0.0592	FOXP3	forkhead box P3
ILMN_2250923	0.437	0.00833	-2.73322	-2.60967	-0.0853	FOXP1	forkhead box P1
ILMN_1682495	0.4414	0.00909	-2.70042	-2.6835	-0.21	FOXP1	forkhead box P1
ILMN_1665304	0.4137	0.00641	2.82964	-2.38881	0.056	FOXN3	forkhead box N3
ILMN_2344971	0.0999	2.46e-05	4.59097	2.45737	0.787	FOXM1	forkhead box M1
ILMN_1716400	0.2015	8.67e-05	4.22461	1.34657	0.548	FOXM1	forkhead box M1
ILMN_1781867	0.3982	0.00507	-2.91483	-2.18899	-0.17	FOXD4L1	forkhead box D4-like 1
ILMN_2085441	0.4489	0.00983	-2.6707	-2.74982	-0.164	FOXD4L1	forkhead box D4-like 1
ILMN_1751607	0.3423	0.00178	-3.27763	-1.29188	-1.39	FOSB	FosB proto-oncogene, AP-1 transcription factor subunit
ILMN_1661733	0.2698	0.000544	-3.66417	-0.26159	-1.47	FOLR1	folate receptor 1
ILMN_2346339	0.3421	0.00176	-3.28178	-1.28121	-1.33	FOLR1	folate receptor 1
ILMN_2078124	0.366	0.00348	-3.04846	-1.86705	-0.0661	FMO6P	flavin containing monooxygenase 6 pseudogene
ILMN_1732158	0.4246	0.00755	-2.76952	-2.5272	-0.437	FMO2	flavin containing monooxygenase 2
ILMN_1805665	0.3982	0.00544	-2.8891	-2.24979	-0.826	FLRT3	fibronectin leucine rich transmembrane protein 3
ILMN_1665738	0.409	0.00609	-2.84829	-2.34543	-0.116	FLI1	Fli-1 proto-oncogene, ETS transcription factor
ILMN_1800889	0.397	0.00494	-2.92438	-2.16634	-0.265	FIG4	FIG4 phosphoinositide 5-phosphatase
ILMN_1805842	0.3541	0.00274	-3.13067	-1.66399	-0.464	FHL1	four and a half LIM domains 1
ILMN_1812517	0.3366	0.00147	3.34272	-1.12349	0.0814	FGF8	fibroblast growth factor 8
ILMN_1751460	0.3478	0.00251	3.16147	-1.58695	0.0957	FEV	FEV, ETS transcription factor
ILMN_1755834	0.2698	0.000337	3.81363	0.15509	0.468	FEN1	flap structure-specific endonuclease 1
ILMN_1780060	0.44	0.00883	-2.71109	-2.65957	-0.969	FCN3	ficolin 3
ILMN_1815734	0.3827	0.00414	-2.98686	-2.01673	-0.382	FCHSD2	FCH and double SH3 domains 2
ILMN_1705302	0.437	0.0084	-2.73004	-2.61687	-0.458	FCGRT	Fc fragment of IgG receptor and transporter
ILMN_1804174	0.2698	0.000552	-3.65943	-0.27466	-0.264	FCGR2B	Fc fragment of IgG receptor IIb
ILMN_2382403	0.3566	0.00315	-3.08236	-1.78377	-0.155	FCGR2B	Fc fragment of IgG receptor IIb
ILMN_1718984	0.366	0.00348	-3.04794	-1.86832	-0.698	FCGBP	Fc fragment of IgG binding protein
ILMN_2302757	0.4246	0.0075	-2.77228	-2.52088	-1.2	FCGBP	Fc fragment of IgG binding protein
ILMN_1688423	0.1921	7.87e-05	-4.25316	1.43162	-0.964	FCER1A	Fc fragment of IgE receptor Ia
ILMN_2350266	0.4236	0.00709	2.79281	-2.47386	0.299	FBXO46	F-box protein 46
ILMN_1663379	0.3982	0.00541	2.89173	-2.2436	0.275	FBXL15	F-box and leucine rich repeat protein 15
ILMN_2223941	0.3007	0.000832	-3.52815	-0.63222	-0.59	FBLN5	fibulin 5
ILMN_1726756	0.3007	0.000859	3.51777	-0.66015	0.152	FANCB	Fanconi anemia complementation group B
ILMN_1777322	0.357	0.00318	3.07937	-1.79113	0.278	FAM91A1	family with sequence similarity 91 member A1
ILMN_1658301	0.2998	0.000716	-3.57627	-0.50208	-0.673	FAM83E	family with sequence similarity 83 member E
ILMN_1781943	0.2698	0.000559	3.65526	-0.28613	0.505	FAM83D	family with sequence similarity 83 member D
ILMN_1701882	0.3432	0.00186	3.26273	-1.33013	0.188	FAM72D	family with sequence similarity 72 member D
ILMN_1794038	0.4208	0.00696	-2.79968	-2.45805	-0.154	FAM49A	family with sequence similarity 49 member A
ILMN_1713266	0.4481	0.00979	-2.67233	-2.7462	-0.737	FAM46C	family with sequence similarity 46 member C
ILMN_1717219	0.3703	0.0038	3.0169	-1.94399	0.423	FAM220A	family with sequence similarity 220 member A
ILMN_1797475	0.4062	0.00573	-2.87091	-2.29256	-0.334	FAM216B	family with sequence similarity 216 member B
ILMN_1754538	0.3973	0.00499	2.92064	-2.17522	0.508	FAM213A	family with sequence similarity 213 member A
ILMN_2415474	0.366	0.00345	3.05129	-1.86012	0.107	FAM19A4	family with sequence similarity 19 member A4, C-C motif chemokine like
ILMN_1691876	0.4166	0.00678	2.8095	-2.4354	0.046	FAM19A2	family with sequence similarity 19 member A2, C-C motif chemokine like
ILMN_1777170	0.3973	0.00497	-2.92213	-2.17168	-0.751	FAM183A	family with sequence similarity 183 member A
ILMN_1690329	0.4475	0.00975	-2.67381	-2.74291	-0.213	FAM118B	family with sequence similarity 118 member B
ILMN_1773006	0.3161	0.00106	-3.44878	-0.84453	-0.203	FABP4	fatty acid binding protein 4
ILMN_1679158	0.3421	0.00168	-3.2969	-1.24224	-0.403	FAAH2	fatty acid amide hydrolase 2
ILMN_2370622	0.4212	0.00698	-2.79873	-2.46022	-0.0693	F8	coagulation factor VIII
ILMN_1675083	0.44	0.00885	-2.71052	-2.66085	-0.178	F8	coagulation factor VIII
ILMN_1659725	0.3432	0.00209	3.22299	-1.43155	0.459	EXOSC5	exosome component 5
ILMN_1815012	0.4246	0.00743	-2.77534	-2.5139	-0.35	EXOC7	exocyst complex component 7
ILMN_1673721	0.3432	0.00208	3.22452	-1.42767	0.445	EXO1	exonuclease 1
ILMN_1763452	0.3432	0.00206	-3.22811	-1.41855	-0.571	EVI2B	ecotropic viral integration site 2B
ILMN_1742145	0.3982	0.00526	2.90132	-2.22096	0.196	ESPL1	extra spindle pole bodies like 1, separase
ILMN_1668092	0.3566	0.00301	-3.09835	-1.74425	-0.709	ESAM	endothelial cell adhesion molecule
ILMN_2334204	0.2998	0.000783	3.54752	-0.57997	0.162	ERCC6L	ERCC excision repair 6 like, spindle assembly checkpoint helicase
ILMN_1775931	0.4218	0.00701	-2.797	-2.46421	-0.376	EPHA3	EPH receptor A3
ILMN_1722309	0.3982	0.00508	2.9142	-2.1905	0.444	ENDOG	endonuclease G
ILMN_1709593	0.4046	0.00563	2.87703	-2.27818	0.0678	EN1	engrailed homeobox 1
ILMN_1797074	0.3432	0.00242	3.17349	-1.55675	0.453	EMG1	EMG1, N1-specific pseudouridine methyltransferase
ILMN_1750102	0.44	0.00881	2.71193	-2.65767	0.118	EME1	essential meiotic structure-specific endonuclease 1
ILMN_1764873	0.4062	0.00585	-2.86319	-2.31062	-0.238	ELAVL1	ELAV like RNA binding protein 1
ILMN_1706635	0.4425	0.00928	-2.69273	-2.70072	-0.249	ELANE	elastase, neutrophil expressed
ILMN_1794967	0.382	0.0041	2.99036	-2.00828	0.3	EIF4ENIF1	eukaryotic translation initiation factor 4E nuclear import factor 1
ILMN_2197225	0.4246	0.00759	-2.76779	-2.53114	-0.276	EIF4EBP3	eukaryotic translation initiation factor 4E binding protein 3
ILMN_1728083	0.4032	0.00559	2.87935	-2.27274	0.342	EIF4EBP2	eukaryotic translation initiation factor 4E binding protein 2
ILMN_1713380	0.3432	0.00221	3.20515	-1.47684	0.379	EIF2B2	eukaryotic translation initiation factor 2B subunit beta
ILMN_1726138	0.3421	0.00169	3.29493	-1.24733	0.483	EI24	EI24, autophagy associated transmembrane protein
ILMN_1774063	0.3585	0.00322	3.07476	-1.8025	0.0701	EDEM3	ER degradation enhancing alpha-mannosidase like protein 3
ILMN_2275248	0.3575	0.00321	3.07653	-1.79813	0.318	ECE2	endothelin converting enzyme 2
ILMN_1777233	0.383	0.00437	2.96805	-2.062	0.639	E2F2	E2F transcription factor 2
ILMN_1797522	0.4162	0.00661	-2.81862	-2.41433	-0.439	DUSP3	dual specificity phosphatase 3
ILMN_1675941	0.4295	0.00782	2.75649	-2.55689	0.0678	DUSP15	dual specificity phosphatase 15
ILMN_1716445	0.3161	0.00109	3.43987	-0.8682	0.605	DTYMK	deoxythymidylate kinase
ILMN_1779711	0.4401	0.009	2.70393	-2.67564	0.251	DTL	denticleless E3 ubiquitin protein ligase homolog
ILMN_1658259	0.3295	0.0014	3.35835	-1.08272	0.471	DRG1	developmentally regulated GTP binding protein 1
ILMN_1708107	0.4475	0.00969	-2.67621	-2.73757	-0.469	DPT	dermatopontin
ILMN_1770048	0.4442	0.0094	2.6878	-2.71173	0.23	DPH5	diphthamide biosynthesis 5
ILMN_2049184	0.1222	3.51e-05	-4.4889	2.14382	-0.325	DNASE1L3	deoxyribonuclease 1 like 3
ILMN_1745501	0.383	0.00427	-2.97645	-2.04182	-0.755	DNALI1	dynein axonemal light intermediate chain 1
ILMN_1799516	0.366	0.00347	3.04908	-1.86552	0.439	DNAJC9	DnaJ heat shock protein family (Hsp40) member C9
ILMN_1810436	0.4442	0.00944	-2.68615	-2.71542	-0.207	DNAJC27	DnaJ heat shock protein family (Hsp40) member C27
ILMN_1685052	0.2998	0.000772	-3.55233	-0.56696	-0.358	DNAH1	dynein axonemal heavy chain 1
ILMN_1732537	0.2698	0.000395	3.76461	0.01738	0.421	DNAAF5	dynein axonemal assembly factor 5
ILMN_2282959	0.3161	0.00128	3.38882	-1.00293	0.171	DNA2	DNA replication helicase/nuclease 2
ILMN_1749829	0.3432	0.0022	3.20704	-1.47204	0.419	DLGAP5	DLG associated protein 5
ILMN_2043918	0.4156	0.00651	2.82433	-2.40112	0.332	DLEU1	deleted in lymphocytic leukemia 1
ILMN_2401987	0.4339	0.00809	-2.74413	-2.58496	-0.179	DLEC1	deleted in lung and esophageal cancer 1
ILMN_1813517	0.3566	0.00297	3.10359	-1.73128	0.206	DISP2	dispatched RND transporter family member 2
ILMN_1706100	0.4178	0.00687	2.80416	-2.44772	0.0478	DICER1	dicer 1, ribonuclease III
ILMN_1695226	0.4166	0.00669	2.81404	-2.42494	0.118	DIAPH3	diaphanous related formin 3
ILMN_1744308	0.3215	0.00133	3.37586	-1.03691	0.464	DHX33	DEAH-box helicase 33
ILMN_1807206	0.4442	0.00946	-2.68546	-2.71694	-0.391	DHRS1	dehydrogenase/reductase 1
ILMN_1667213	0.3768	0.00398	3.00131	-1.9818	0.296	DFFA	DNA fragmentation factor subunit alpha
ILMN_1679405	0.366	0.00342	3.054	-1.85348	0.354	DDX56	DEAD-box helicase 56
ILMN_1747303	0.4339	0.00809	2.74381	-2.5857	0.392	DDX39A	DEAD-box helicase 39A
ILMN_1790100	0.3692	0.00363	3.03367	-1.90317	0.285	DDIAS	DNA damage induced apoptosis suppressor
ILMN_2124352	0.44	0.00867	2.71797	-2.64408	0.392	DCUN1D5	defective in cullin neddylation 1 domain containing 5
ILMN_1757631	0.3421	0.00177	3.27911	-1.28808	0.473	DBNDD1	dysbindin domain containing 1
ILMN_1764228	0.3366	0.00146	-3.34453	-1.11877	-0.614	DAB2	DAB2, clathrin adaptor protein
ILMN_2097259	0.383	0.00427	-2.97643	-2.04186	-0.13	CYP2U1	cytochrome P450 family 2 subfamily U member 1
ILMN_1704985	0.3941	0.00467	-2.94427	-2.11895	-0.702	CYP27A1	cytochrome P450 family 27 subfamily A member 1
ILMN_1806010	0.3421	0.00167	-3.29895	-1.23696	-0.282	CUL9	cullin 9
ILMN_1773018	0.3366	0.00155	3.32483	-1.16998	0.37	CUEDC2	CUE domain containing 2
ILMN_1743032	0.44	0.00883	-2.71117	-2.65937	-0.384	CTSS	cathepsin S
ILMN_1752451	0.4101	0.0062	-2.84179	-2.36057	-0.937	CTSH	cathepsin H
ILMN_1653129	0.2537	0.000198	3.97788	0.62362	0.45	CSTF2	cleavage stimulation factor subunit 2
ILMN_1665797	0.3053	0.000938	3.48916	-0.73691	0.433	CSE1L	chromosome segregation 1 like
ILMN_1720484	0.3432	0.00192	-3.25174	-1.35826	-0.347	CRTAP	cartilage associated protein
ILMN_2225735	0.3421	0.00175	-3.28396	-1.27561	-0.372	CRBN	cereblon
ILMN_1681325	0.4062	0.00574	2.87009	-2.29447	0.254	CPTP	ceramide-1-phosphate transfer protein
ILMN_1677038	0.4237	0.00713	-2.79052	-2.47911	-0.4	CPED1	cadherin like and PC-esterase domain containing 1
ILMN_1666364	0.383	0.00437	-2.96791	-2.06233	-0.366	COQ10A	coenzyme Q10A
ILMN_1757415	0.2698	0.000478	3.705	-0.1487	0.285	COA7	cytochrome c oxidase assembly factor 7 (putative)
ILMN_1669674	0.4101	0.00623	2.84047	-2.36364	0.35	CNPY3	canopy FGF signaling regulator 3
ILMN_2207393	0.2698	0.000584	3.64163	-0.32359	0.504	CNOT3	CCR4-NOT transcription complex subunit 3
ILMN_2086612	0.3432	0.00197	-3.24292	-1.38078	-0.497	CMAHP	cytidine monophospho-N-acetylneuraminic acid hydroxylase, pseudogene
ILMN_1704084	0.4519	0.01	-2.66396	-2.76477	-0.435	CMAHP	cytidine monophospho-N-acetylneuraminic acid hydroxylase, pseudogene
ILMN_1778203	0.3478	0.00249	-3.16444	-1.57949	-0.401	CLN5	ceroid-lipofuscinosis, neuronal 5
ILMN_1699665	0.4246	0.00742	-2.77581	-2.51282	-1.09	CLIC6	chloride intracellular channel 6
ILMN_1782729	0.4414	0.0091	-2.69976	-2.68499	-0.199	CLECL1	C-type lectin like 1
ILMN_1780465	0.44	0.00885	-2.71053	-2.66083	-0.354	CLEC5A	C-type lectin domain family 5 member A
ILMN_1723115	0.3366	0.00153	-3.32949	-1.15787	-0.168	CLEC4F	C-type lectin domain family 4 member F
ILMN_2399363	0.4498	0.0099	-2.66809	-2.75562	-0.376	CLEC4A	C-type lectin domain family 4 member A
ILMN_1682176	0.4177	0.00686	-2.80473	-2.44641	-0.494	CLEC3B	C-type lectin domain family 3 member B
ILMN_2142185	0.3541	0.00277	-3.12758	-1.67167	-0.582	CLEC14A	C-type lectin domain family 14 member A
ILMN_2072568	0.3635	0.00335	3.06131	-1.83556	0.685	CLDN8	claudin 8
ILMN_1696284	0.3703	0.00381	-3.01674	-1.94439	-1.71	CLDN18	claudin 18
ILMN_2072296	0.3432	0.00186	3.26394	-1.32703	0.717	CKS2	CDC28 protein kinase regulatory subunit 2
ILMN_1756326	0.4119	0.00631	2.83561	-2.37495	0.642	CKS2	CDC28 protein kinase regulatory subunit 2
ILMN_1719256	0.3366	0.00153	3.32798	-1.1618	0.717	CKS1B	CDC28 protein kinase regulatory subunit 1B
ILMN_2041046	0.3432	0.00223	3.20201	-1.48478	0.605	CKS1B	CDC28 protein kinase regulatory subunit 1B
ILMN_1751776	0.3053	0.000928	3.49272	-0.72738	0.484	CKAP2L	cytoskeleton associated protein 2 like
ILMN_1674411	0.3959	0.00485	2.9306	-2.15155	0.302	CKAP2	cytoskeleton associated protein 2
ILMN_1674661	0.3525	0.00264	-3.14406	-1.63054	-0.442	CIRBP	cold inducible RNA binding protein
ILMN_1773363	0.4166	0.00673	-2.81187	-2.42993	-0.223	CIITA	class II major histocompatibility complex transactivator
ILMN_1794011	0.4062	0.00588	-2.8614	-2.31482	-0.13	CHST2	carbohydrate sulfotransferase 2
ILMN_2395240	0.2698	0.000418	3.74684	-0.03229	0.41	CHEK2	checkpoint kinase 2
ILMN_2395236	0.4287	0.00775	2.76006	-2.54877	0.332	CHEK2	checkpoint kinase 2
ILMN_1664630	0.2698	0.00035	3.8022	0.12287	0.428	CHEK1	checkpoint kinase 1
ILMN_1677376	0.4166	0.00678	2.80905	-2.43646	0.386	CHD7	chromodomain helicase DNA binding protein 7
ILMN_1730229	0.2698	0.000432	-3.73622	-0.06191	-0.737	CGNL1	cingulin like 1
ILMN_1705813	0.4246	0.00725	-2.78484	-2.49215	-0.461	CFTR	cystic fibrosis transmembrane conductance regulator
ILMN_1727815	0.2998	0.000711	-3.57857	-0.49582	-0.685	CFI	complement factor I
ILMN_1657803	0.3765	0.00397	-3.00225	-1.97953	-0.707	CFH	complement factor H
ILMN_1777190	0.308	0.000966	-3.47962	-0.7624	-0.899	CFD	complement factor D
ILMN_1747016	0.3161	0.00106	3.44815	-0.84621	0.541	CEP55	centrosomal protein 55
ILMN_2223805	0.396	0.00488	2.92847	-2.15661	0.343	CEP41	centrosomal protein 41
ILMN_1763907	0.3432	0.00185	3.26467	-1.32515	0.406	CENPW	centromere protein W
ILMN_1787477	0.2324	0.000105	4.16857	1.18047	0.258	CENPO	centromere protein O
ILMN_1720526	0.3432	0.00238	3.17913	-1.54255	0.509	CENPN	centromere protein N
ILMN_1668814	0.2451	0.00016	4.04082	0.80592	0.554	CENPM	centromere protein M
ILMN_2368721	0.2698	0.00053	3.67192	-0.24021	0.374	CENPM	centromere protein M
ILMN_2368718	0.3432	0.00203	3.23282	-1.40655	0.606	CENPM	centromere protein M
ILMN_1742779	0.3421	0.00177	3.28021	-1.28525	0.368	CENPL	centromere protein L
ILMN_1664516	0.3984	0.00546	2.88796	-2.25249	0.58	CENPF	centromere protein F
ILMN_1716279	0.383	0.00439	2.96647	-2.06581	0.304	CENPE	centromere protein E
ILMN_2392472	0.2698	0.000437	3.73319	-0.07035	0.331	CENPA	centromere protein A
ILMN_1801257	0.2698	0.00058	3.64367	-0.31798	0.55	CENPA	centromere protein A
ILMN_2400947	0.4254	0.00763	-2.76584	-2.5356	-0.351	CELF2	CUGBP, Elav-like family member 2
ILMN_1686516	0.3959	0.00485	2.9306	-2.15154	0.147	CELF1	CUGBP, Elav-like family member 1
ILMN_1712522	0.4246	0.00758	-2.76815	-2.53032	-0.978	CEACAM6	carcinoembryonic antigen related cell adhesion molecule 6
ILMN_1651237	0.2698	0.000528	3.67331	-0.23639	0.625	CDT1	chromatin licensing and DNA replication factor 1
ILMN_2234187	0.3161	0.00111	-3.4342	-0.8832	-0.15	CDO1	cysteine dioxygenase type 1
ILMN_1666305	0.2698	0.000343	3.80842	0.1404	0.58	CDKN3	cyclin dependent kinase inhibitor 3
ILMN_1784602	0.2998	0.0007	-3.58357	-0.48223	-0.753	CDKN1A	cyclin dependent kinase inhibitor 1A
ILMN_1747911	0.0999	2.36e-05	4.60208	2.49168	0.746	CDK1	cyclin dependent kinase 1
ILMN_1710428	0.2422	0.000118	4.13339	1.07675	0.234	CDK1	cyclin dependent kinase 1
ILMN_1709294	0.2867	0.000634	3.61511	-0.39625	0.563	CDCA8	cell division cycle associated 8
ILMN_1683450	0.2698	0.000418	3.7469	-0.03214	0.877	CDCA5	cell division cycle associated 5
ILMN_1684045	0.3007	0.00086	3.51756	-0.66072	0.531	CDCA4	cell division cycle associated 4
ILMN_2383964	0.3692	0.00363	3.03349	-1.90361	0.182	CDCA4	cell division cycle associated 4
ILMN_1753183	0.4295	0.00777	2.7589	-2.5514	0.36	CDCA4	cell division cycle associated 4
ILMN_1737728	0.0452	3.31e-06	5.15207	4.22778	0.683	CDCA3	cell division cycle associated 3
ILMN_1670238	0.2698	0.000553	3.65877	-0.27646	0.733	CDC45	cell division cycle 45
ILMN_2407619	0.3161	0.00115	3.42267	-0.91373	0.221	CDC25C	cell division cycle 25C
ILMN_1725260	0.3432	0.00242	3.17351	-1.55669	0.281	CDC25C	cell division cycle 25C
ILMN_1711005	0.2998	0.00079	3.54489	-0.58706	0.35	CDC25A	cell division cycle 25A
ILMN_1663390	0.366	0.0035	3.04623	-1.87251	0.882	CDC20	cell division cycle 20
ILMN_1678605	0.3432	0.00219	3.20743	-1.47106	0.499	CDC123	cell division cycle 123
ILMN_1700681	0.4166	0.00668	-2.8148	-2.42318	-0.483	CD99L2	CD99 molecule like 2
ILMN_2328666	0.2698	0.000277	-3.87398	0.32597	-0.644	CD83	CD83 molecule
ILMN_1780582	0.3161	0.00126	-3.39215	-0.99418	-0.57	CD83	CD83 molecule
ILMN_2379644	0.4062	0.00589	-2.86045	-2.31703	-0.659	CD74	CD74 molecule
ILMN_2188333	0.3432	0.00184	-3.26707	-1.319	-0.558	CD69	CD69 molecule
ILMN_1753468	0.0715	7.33e-06	-4.93205	3.52501	-0.677	CD63	CD63 molecule
ILMN_2208903	0.3161	0.00109	-3.43914	-0.87013	-0.865	CD52	CD52 molecule
ILMN_1803429	0.3648	0.0034	-3.05665	-1.84699	-0.745	CD44	CD44 molecule (Indian blood group)
ILMN_2112357	0.3517	0.00255	-3.1557	-1.60142	-0.533	CD300LF	CD300 molecule like family member f
ILMN_1718754	0.3566	0.00311	-3.08694	-1.77246	-0.462	CD207	CD207 molecule
ILMN_2335754	0.4459	0.00959	-2.68005	-2.72901	-0.425	CD1E	CD1e molecule
ILMN_1719433	0.3432	0.00202	-3.23535	-1.40011	-0.186	CD1D	CD1d molecule
ILMN_1654210	0.3295	0.0014	-3.35795	-1.08378	-0.452	CD1C	CD1c molecule
ILMN_1723520	0.4137	0.0064	-2.83036	-2.38715	-0.823	CD1A	CD1a molecule
ILMN_2246083	0.3937	0.00455	2.95351	-2.09686	0.966	CCZ1B	CCZ1 homolog B, vacuolar protein trafficking and biogenesis associated
ILMN_1679382	0.3432	0.00212	3.21902	-1.44164	0.511	CCT2	chaperonin containing TCP1 subunit 2
ILMN_1801939	0.2698	0.000509	3.68478	-0.2047	0.811	CCNB2	cyclin B2
ILMN_1712803	0.3566	0.00299	3.10068	-1.7385	0.443	CCNB1	cyclin B1
ILMN_1786125	0.1885	7.32e-05	4.2747	1.49595	0.574	CCNA2	cyclin A2
ILMN_1769129	0.3982	0.00535	-2.89515	-2.23553	-0.842	CCL19	C-C motif chemokine ligand 19
ILMN_1740609	0.4453	0.00955	-2.68188	-2.72494	-0.537	CCL14	C-C motif chemokine ligand 14
ILMN_1692948	0.4212	0.00698	2.79849	-2.46079	0.186	CCDC90B	coiled-coil domain containing 90B
ILMN_1792681	0.3566	0.00289	3.11263	-1.70887	0.352	CCDC86	coiled-coil domain containing 86
ILMN_1657680	0.3982	0.00536	-2.89452	-2.23703	-0.13	CCDC69	coiled-coil domain containing 69
ILMN_1815326	0.3566	0.00302	-3.09762	-1.74607	-0.218	CCDC68	coiled-coil domain containing 68
ILMN_1745904	0.4142	0.00643	2.82849	-2.39148	0.336	CCDC6	coiled-coil domain containing 6
ILMN_1772588	0.3959	0.00484	-2.93149	-2.14942	-0.134	CCDC170	coiled-coil domain containing 170
ILMN_1651987	0.2698	0.000406	3.75588	-0.00705	0.526	CCDC167	coiled-coil domain containing 167
ILMN_1657361	0.4246	0.00735	-2.77976	-2.50378	-0.444	CBX7	chromobox 7
ILMN_1790625	0.3432	0.00184	3.2661	-1.32148	0.618	CBX3	chromobox 3
ILMN_1774086	0.3432	0.00216	3.21329	-1.45619	0.249	CBX3	chromobox 3
ILMN_1677108	0.3566	0.0031	-3.08867	-1.76819	-0.994	CAPN13	calpain 13
ILMN_2401057	0.4425	0.00927	-2.69279	-2.70058	-0.353	CANX	calnexin
ILMN_1810992	0.4377	0.00845	2.72777	-2.62198	0.269	CAD	carbamoyl-phosphate synthetase 2, aspartate transcarbamylase, and dihydroorotase
ILMN_1768533	0.4145	0.00647	2.82631	-2.39654	0.049	CACNA2D1	calcium voltage-gated channel auxiliary subunit alpha2delta 1
ILMN_1687848	0.3161	0.00115	-3.42266	-0.91374	-0.785	C7	complement component 7
ILMN_1810752	0.3413	0.00161	-3.31211	-1.20294	-1.52	C4BPA	complement component 4 binding protein alpha
ILMN_2283388	0.4246	0.00748	2.77316	-2.51887	0.527	C20orf24	chromosome 20 open reading frame 24
ILMN_1656242	0.4311	0.00795	2.75048	-2.57057	0.0526	C1R	complement C1r subcomponent
ILMN_1695740	0.4414	0.00913	2.69889	-2.68694	0.0719	C1QTNF8	C1q and tumor necrosis factor related protein 8
ILMN_1754894	0.2698	0.00028	-3.87083	0.31702	-0.723	C1orf162	chromosome 1 open reading frame 162
ILMN_1907042	0.2491	0.000181	-4.00445	0.70039	-0.464	C1orf132	chromosome 1 open reading frame 132
ILMN_1750400	0.3161	0.00125	-3.39415	-0.98892	-0.563	C19orf66	chromosome 19 open reading frame 66
ILMN_1676222	0.3703	0.00383	-3.01425	-1.95044	-0.527	C16orf89	chromosome 16 open reading frame 89
ILMN_1677402	0.3566	0.00293	-3.10817	-1.71993	-0.83	C11orf96	chromosome 11 open reading frame 96
ILMN_1701243	0.3541	0.00275	3.13035	-1.66478	0.317	C10orf2	chromosome 10 open reading frame 2
ILMN_1676548	0.3566	0.00294	3.10653	-1.724	0.464	BZW2	basic leucine zipper and W2 domains 2
ILMN_1682792	0.0999	1.95e-05	4.65751	2.66331	0.533	BYSL	bystin like
ILMN_1778764	0.408	0.00602	2.85263	-2.3353	0.356	BUB3	BUB3, mitotic checkpoint protein
ILMN_2202948	0.4046	0.00564	2.87653	-2.27936	0.41	BUB1	BUB1 mitotic checkpoint serine/threonine kinase
ILMN_1662026	0.2491	0.000184	-3.99988	0.68716	-0.557	BTK	Bruton tyrosine kinase
ILMN_1803570	0.3525	0.00263	3.14545	-1.62708	0.124	BRI3BP	BRI3 binding protein
ILMN_1800619	0.4094	0.00611	2.84724	-2.34789	0.268	BRI3BP	BRI3 binding protein
ILMN_1652472	0.3703	0.00384	3.01392	-1.95124	0.288	BRAF	B-Raf proto-oncogene, serine/threonine kinase
ILMN_1810680	0.3161	0.00121	3.40649	-0.95644	0.433	BOLA2	bolA family member 2
ILMN_1682661	0.4046	0.00563	-2.8768	-2.27873	-0.15	BMP3	bone morphogenetic protein 3
ILMN_1803124	0.2698	0.000482	3.70221	-0.15645	0.273	BIRC5	baculoviral IAP repeat containing 5
ILMN_2349459	0.3413	0.00161	3.3111	-1.20556	0.773	BIRC5	baculoviral IAP repeat containing 5
ILMN_1768534	0.3982	0.00513	-2.91028	-2.19978	-0.52	BHLHE40	basic helix-loop-helix family member e40
ILMN_2371147	0.3692	0.00371	3.02583	-1.92229	0.372	BCL7C	BCL tumor suppressor 7C
ILMN_2179837	0.2698	0.000324	3.82581	0.18945	0.405	BANF1	barrier to autointegration factor 1
ILMN_1749243	0.3432	0.00182	3.27045	-1.31031	0.262	BANF1	barrier to autointegration factor 1
ILMN_1691410	0.1885	7.24e-05	-4.27784	1.50536	-1.61	BAMBI	BMP and activin membrane bound inhibitor
ILMN_1652865	0.3783	0.004	-2.99883	-1.98781	-0.0847	BAIAP2	BAI1 associated protein 2
ILMN_2206141	0.437	0.00838	2.73097	-2.61477	0.273	BAGE5	B melanoma antigen family member 5
ILMN_2268855	0.2698	0.000319	3.83055	0.20284	0.132	BAG5	BCL2 associated athanogene 5
ILMN_1780188	0.3541	0.00272	3.13393	-1.65586	0.192	B3GALNT2	beta-1,3-N-acetylgalactosaminyltransferase 2
ILMN_2148459	0.3086	0.00098	-3.47506	-0.77457	-0.526	B2M	beta-2-microglobulin
ILMN_1725427	0.4236	0.0071	-2.79249	-2.47458	-0.426	B2M	beta-2-microglobulin
ILMN_1684217	0.2698	0.000388	3.76975	0.03177	0.78	AURKB	aurora kinase B
ILMN_1787280	0.0724	9.86e-06	4.84936	3.26358	0.439	AUNIP	aurora kinase A and ninein interacting protein
ILMN_2271627	0.4263	0.00766	2.76401	-2.53977	0.365	ATXN2L	ataxin 2 like
ILMN_1783956	0.3816	0.00408	-2.99243	-2.00328	-0.332	ATP8B4	ATPase phospholipid transporting 8B4 (putative)
ILMN_1752579	0.3432	0.00201	-3.23706	-1.39574	-0.545	ATP6V0A1	ATPase H+ transporting V0 subunit a1
ILMN_1775285	0.4525	0.01	-2.66266	-2.76767	-0.112	ATP13A5	ATPase 13A5
ILMN_1737833	0.3982	0.00536	2.89453	-2.23701	0.612	ATN1	atrophin 1
ILMN_2048700	0.2698	0.000383	3.77428	0.04444	0.509	ATAD2	ATPase family, AAA domain containing 2
ILMN_1815184	0.4236	0.0071	2.79249	-2.47459	0.571	ASPM	abnormal spindle microtubule assembly
ILMN_2397776	0.3982	0.00531	2.89802	-2.22876	0.239	ASB6	ankyrin repeat and SOCS box containing 6
ILMN_1661492	0.4166	0.00666	2.81577	-2.42092	0.258	ARRDC1	arrestin domain containing 1
ILMN_1762582	0.4429	0.0093	-2.69164	-2.70315	-0.104	ARNT	aryl hydrocarbon receptor nuclear translocator
ILMN_1769810	0.4401	0.009	-2.70417	-2.6751	-0.457	ARL6IP5	ADP ribosylation factor like GTPase 6 interacting protein 5
ILMN_1777550	0.437	0.00824	2.73718	-2.60071	0.0479	ARL13A	ADP ribosylation factor like GTPase 13A
ILMN_1803423	0.4417	0.00921	-2.69529	-2.69498	-0.409	ARHGEF6	Rac/Cdc42 guanine nucleotide exchange factor 6
ILMN_1717403	0.2698	0.000378	3.77835	0.05587	0.195	ARHGEF39	Rho guanine nucleotide exchange factor 39
ILMN_1703477	0.1885	6.55e-05	-4.3075	1.59421	-0.691	ARHGEF2	Rho/Rac guanine nucleotide exchange factor 2
ILMN_1663916	0.4246	0.0074	-2.77685	-2.51043	-0.425	ARHGAP9	Rho GTPase activating protein 9
ILMN_1811392	0.2698	0.000338	-3.81305	0.15345	-0.472	ARHGAP45	Rho GTPase activating protein 45
ILMN_1777998	0.437	0.00839	-2.73035	-2.61617	-0.324	ARHGAP25	Rho GTPase activating protein 25
ILMN_2208413	0.3703	0.00385	-3.01229	-1.95521	-0.408	ARHGAP15	Rho GTPase activating protein 15
ILMN_2215881	0.2698	0.000502	3.68918	-0.19253	0.134	ARHGAP11B	Rho GTPase activating protein 11B
ILMN_1788468	0.4101	0.00624	-2.8398	-2.36521	-0.558	ARGLU1	arginine and glutamate rich 1
ILMN_1764297	0.44	0.0088	-2.71247	-2.65645	-0.0693	ARF6	ADP ribosylation factor 6
ILMN_1726410	0.3432	0.00219	3.2073	-1.47138	0.497	APRT	adenine phosphoribosyltransferase
ILMN_1722491	0.4456	0.00958	2.68069	-2.72759	0.431	APRT	adenine phosphoribosyltransferase
ILMN_1697925	0.4519	0.01	-2.66443	-2.76373	-0.179	APOBR	apolipoprotein B receptor
ILMN_1667086	0.3432	0.00242	3.17333	-1.55715	0.415	AP3M1	adaptor related protein complex 3 mu 1 subunit
ILMN_2362122	0.3541	0.00279	3.12542	-1.67706	0.393	AP3M1	adaptor related protein complex 3 mu 1 subunit
ILMN_1662426	0.3566	0.00304	3.0955	-1.7513	0.466	AP2S1	adaptor related protein complex 2 sigma 1 subunit
ILMN_1699598	0.3566	0.00303	3.09685	-1.74797	0.405	AP2M1	adaptor related protein complex 2 mu 1 subunit
ILMN_1782086	0.2698	0.000267	-3.88559	0.35901	-0.276	AOC3	amine oxidase, copper containing 3
ILMN_1739645	0.3144	0.00103	3.45931	-0.81655	0.487	ANLN	anillin actin binding protein
ILMN_2115218	0.4236	0.00712	-2.7914	-2.47709	-0.58	ANKRD10	ankyrin repeat domain 10
ILMN_1675483	0.437	0.00838	-2.73089	-2.61494	-0.447	ANKMY1	ankyrin repeat and MYND domain containing 1
ILMN_1794470	0.3566	0.00294	-3.10653	-1.72398	-0.439	ANKFY1	ankyrin repeat and FYVE domain containing 1
ILMN_1669773	0.3432	0.00188	-3.26002	-1.33708	-0.0616	ANGPTL1	angiopoietin like 1
ILMN_1804812	0.3432	0.00192	3.25202	-1.35755	0.312	ANAPC1	anaphase promoting complex subunit 1
ILMN_1662681	0.3692	0.00371	-3.02525	-1.9237	-0.0787	AMBRA1	autophagy and beclin 1 regulator 1
ILMN_1680996	0.3525	0.00267	-3.13971	-1.64142	-0.793	ALOX5	arachidonate 5-lipoxygenase
ILMN_1670870	0.4283	0.00773	-2.76081	-2.54706	-0.62	ALCAM	activated leukocyte cell adhesion molecule
ILMN_1778173	0.4246	0.00758	-2.7683	-2.52997	-0.422	AK3	adenylate kinase 3
ILMN_1779965	0.416	0.00658	-2.82038	-2.41028	-0.546	AK1	adenylate kinase 1
ILMN_2242299	0.4301	0.0079	-2.75294	-2.56496	-0.0655	AJAP1	adherens junctions associated protein 1
ILMN_1673252	0.3982	0.00542	2.89057	-2.24634	0.365	AIMP2	aminoacyl tRNA synthetase complex interacting multifunctional protein 2
ILMN_2290776	0.3366	0.00156	3.32246	-1.17613	0.282	AGBL5	ATP/GTP binding protein like 5
ILMN_1764309	0.4101	0.00624	-2.83938	-2.36617	-0.772	ADH1A	alcohol dehydrogenase 1A (class I), alpha polypeptide
ILMN_2148944	0.3432	0.00207	-3.22706	-1.42121	-0.409	ADCY4	adenylate cyclase 4
ILMN_1672403	0.2698	0.000447	-3.72585	-0.09079	-0.28	ADAMTS8	ADAM metallopeptidase with thrombospondin type 1 motif 8
ILMN_1770152	0.3161	0.00127	3.39145	-0.99602	0.0674	ADAMTS18	ADAM metallopeptidase with thrombospondin type 1 motif 18
ILMN_1776442	0.4009	0.00554	-2.88267	-2.26492	-0.0487	ACTRT2	actin related protein T2
ILMN_1652594	0.4246	0.00728	-2.78301	-2.49634	-0.284	ACTR5	ARP5 actin-related protein 5 homolog
ILMN_2344956	0.397	0.00492	2.92533	-2.16407	0.525	ACP1	acid phosphatase 1, soluble
ILMN_1723684	0.4166	0.00679	-2.80894	-2.4367	-0.645	ACKR1	atypical chemokine receptor 1 (Duffy blood group)
ILMN_1802096	0.3982	0.00537	-2.89403	-2.23817	-0.471	ABTB1	ankyrin repeat and BTB domain containing 1
ILMN_1673639	0.0319	6.54e-07	-5.59189	5.65853	-0.809	ABI3BP	ABI family member 3 binding protein
ILMN_2318685	0.3717	0.00388	3.01028	-1.96007	0.364	ABHD12	abhydrolase domain containing 12
ILMN_1721225	0.3432	0.00239	3.1785	-1.54413	0.336	AAR2	AAR2 splicing factor homolog
ILMN_1893679	0.2422	0.000119	-4.13036	1.06783	-0.503
ILMN_1678300	0.2451	0.000152	4.057	0.85302	0.57
ILMN_1702783	0.2451	0.000157	4.04803	0.82689	0.596
ILMN_1675204	0.2698	0.000281	3.87039	0.31578	0.0863
ILMN_1875138	0.2698	0.000373	3.78218	0.06661	0.0987
ILMN_1859432	0.2698	0.000526	3.67447	-0.23318	0.0779
ILMN_1670124	0.2698	0.000531	3.67146	-0.2415	0.221
ILMN_1842655	0.2998	0.000692	3.58732	-0.47204	0.0614
ILMN_1871977	0.2998	0.000713	-3.57792	-0.49759	-0.0667
ILMN_1663696	0.2998	0.000713	3.57782	-0.49785	0.065
ILMN_1834156	0.2998	0.000752	-3.56067	-0.54439	-0.0731
ILMN_1910778	0.2998	0.000756	-3.5591	-0.54864	-0.0701
ILMN_2245627	0.2998	0.000779	3.54948	-0.57468	0.0791
ILMN_1698007	0.2998	0.000791	3.54433	-0.58858	0.0765
ILMN_1729115	0.2998	0.000798	3.54166	-0.59579	0.823
ILMN_1845146	0.2998	0.000799	-3.54134	-0.59667	-0.0635
ILMN_1679867	0.3007	0.000824	3.53112	-0.62424	0.476
ILMN_1916161	0.3007	0.000859	3.51772	-0.66031	0.0537
ILMN_1724064	0.3007	0.000863	3.51648	-0.66362	0.258
ILMN_1756992	0.3007	0.000875	-3.51174	-0.67637	-0.616
ILMN_1868244	0.3007	0.000879	3.51052	-0.67964	0.0598
ILMN_1714730	0.3053	0.000911	3.49892	-0.71076	1.24
ILMN_1767219	0.3053	0.000921	3.49539	-0.72021	0.343
ILMN_1794015	0.3053	0.000933	-3.49089	-0.73227	-0.0903
ILMN_1842275	0.3078	0.000952	3.48436	-0.74972	0.0686
ILMN_1664912	0.3144	0.00103	-3.45857	-0.81851	-0.621
ILMN_1820043	0.3161	0.00108	3.44333	-0.859	0.0581
ILMN_1845113	0.3161	0.0011	3.43711	-0.8755	0.0601
ILMN_1763765	0.3161	0.0012	3.40776	-0.95309	0.0655
ILMN_1687913	0.3161	0.00126	-3.39228	-0.99383	-0.0569
ILMN_1866766	0.3161	0.00127	3.391	-0.99718	0.0694
ILMN_1830772	0.3161	0.00128	3.3884	-1.00403	0.0698
ILMN_1838340	0.3295	0.00139	3.36068	-1.07664	0.0573
ILMN_1659553	0.3366	0.00149	3.3374	-1.13733	0.165
ILMN_1668861	0.3421	0.00167	3.29904	-1.23672	0.579
ILMN_1774288	0.3421	0.00168	3.29699	-1.24202	0.0685
ILMN_1855797	0.3421	0.0017	3.29283	-1.25275	0.107
ILMN_1839814	0.3421	0.00173	-3.28733	-1.26693	-0.0714
ILMN_1912732	0.3421	0.00174	3.2862	-1.26984	0.0593
ILMN_1723935	0.3432	0.00181	-3.27284	-1.30418	-0.415
ILMN_2405521	0.3432	0.00188	3.25934	-1.3388	0.677
ILMN_1868274	0.3432	0.00191	3.25397	-1.35256	0.0578
ILMN_1825144	0.3432	0.00196	-3.24534	-1.3746	-0.054
ILMN_1660168	0.3432	0.00203	3.23318	-1.40564	0.0652
ILMN_2052549	0.3432	0.00212	-3.21808	-1.44403	-0.0657
ILMN_1657673	0.3432	0.00214	3.21636	-1.44841	0.2
ILMN_1860487	0.3432	0.00214	-3.21497	-1.45194	-0.0683
ILMN_1856533	0.3432	0.00221	-3.20416	-1.47935	-0.736
ILMN_1692684	0.3432	0.00233	3.18619	-1.52475	0.374
ILMN_1871124	0.3432	0.00234	-3.18538	-1.52679	-0.0567
ILMN_1683487	0.3432	0.00234	-3.18482	-1.52822	-0.126
ILMN_1872457	0.3432	0.00239	-3.17818	-1.54495	-0.362
ILMN_1827549	0.3462	0.00247	3.167	-1.57306	0.0651
ILMN_1799120	0.3478	0.0025	-3.16298	-1.58316	-0.366
ILMN_1804223	0.3478	0.0025	3.16234	-1.58476	0.0669
ILMN_1721802	0.348	0.00252	3.1603	-1.58989	0.0716
ILMN_1721868	0.3525	0.00258	3.15138	-1.61224	0.503
ILMN_1841957	0.3525	0.00262	3.14607	-1.62553	0.0977
ILMN_1882004	0.3525	0.00265	3.14206	-1.63556	0.064
ILMN_1681227	0.3525	0.00266	3.14189	-1.63598	0.0883
ILMN_1858289	0.3525	0.00267	3.14022	-1.64014	0.086
ILMN_1878109	0.3566	0.00288	-3.11416	-1.70506	-0.052
ILMN_1913729	0.3566	0.00299	3.10117	-1.73728	0.0578
ILMN_1788362	0.3566	0.00301	3.09915	-1.74229	0.06
ILMN_1825448	0.3566	0.00302	-3.09791	-1.74534	-0.0704
ILMN_1859524	0.3566	0.00306	3.09295	-1.75761	0.097
ILMN_1784653	0.3566	0.00306	-3.09269	-1.75827	-0.0618
ILMN_1706238	0.3566	0.00307	3.09191	-1.76018	0.37
ILMN_1899147	0.3566	0.00311	-3.08757	-1.77092	-0.0506
ILMN_1879228	0.3566	0.00312	3.08594	-1.77492	0.058
ILMN_1912083	0.3566	0.00312	-3.08571	-1.77551	-0.803
ILMN_1833735	0.3566	0.00316	3.08135	-1.78624	0.0813
ILMN_1859888	0.357	0.00317	-3.08016	-1.78917	-0.0684
ILMN_1740380	0.3589	0.00326	-3.07118	-1.81131	-0.0531
ILMN_1684357	0.3589	0.00326	-3.07115	-1.81136	-0.132
ILMN_1729269	0.3626	0.00331	3.066	-1.82405	0.156
ILMN_1741648	0.3631	0.00334	-3.06241	-1.83286	-1.3
ILMN_1670872	0.3635	0.00336	3.06051	-1.83751	0.0565
ILMN_1856545	0.3637	0.00337	3.05956	-1.83985	0.0486
ILMN_1885058	0.3648	0.0034	3.05639	-1.84762	0.047
ILMN_1912145	0.366	0.00343	-3.05347	-1.85478	-0.0714
ILMN_1795089	0.3692	0.00359	-3.03704	-1.89497	-0.67
ILMN_1777058	0.3692	0.00362	3.0347	-1.90066	0.318
ILMN_1842917	0.3692	0.00367	3.02918	-1.91412	0.0627
ILMN_1841664	0.3692	0.00371	3.0258	-1.92237	0.0658
ILMN_1686811	0.3762	0.00394	3.00441	-1.97429	0.676
ILMN_1662103	0.3762	0.00395	-3.0035	-1.97651	-0.0631
ILMN_1883410	0.3798	0.00404	2.99576	-1.99524	0.065
ILMN_1878922	0.3827	0.00415	2.98584	-2.01919	0.0484
ILMN_1713838	0.3827	0.00417	2.98482	-2.02164	0.0545
ILMN_1701289	0.383	0.00422	2.98013	-2.03294	0.217
ILMN_2090040	0.383	0.00435	-2.96983	-2.05772	-0.319
ILMN_1822484	0.383	0.00435	2.96978	-2.05785	0.059
ILMN_1704241	0.383	0.00436	2.96843	-2.0611	0.049
ILMN_1776842	0.3923	0.00451	2.95653	-2.08963	0.159
ILMN_1896550	0.3939	0.00464	2.94612	-2.11453	0.0624
ILMN_1672742	0.3939	0.00465	2.94566	-2.11562	0.0589
ILMN_1783204	0.3941	0.00468	-2.94373	-2.12023	-0.0756
ILMN_1916183	0.3957	0.0047	2.94174	-2.125	0.0594
ILMN_1857031	0.3959	0.00472	2.94043	-2.12811	0.0565
ILMN_2163315	0.3959	0.00475	2.9379	-2.13416	0.0756
ILMN_1886789	0.3959	0.00477	2.93685	-2.13666	0.0519
ILMN_1877366	0.3959	0.00478	2.93588	-2.13895	0.0511
ILMN_1775851	0.396	0.00489	2.92802	-2.15767	0.0633
ILMN_1735877	0.396	0.00489	-2.92756	-2.15876	-0.616
ILMN_1657286	0.3967	0.00491	-2.92634	-2.16168	-0.0549
ILMN_1659365	0.3982	0.00501	2.91886	-2.17943	0.439
ILMN_1728999	0.3982	0.00505	-2.91637	-2.18535	-0.172
ILMN_1708047	0.3982	0.00519	2.90618	-2.20947	0.377
ILMN_1841468	0.3982	0.0052	-2.90562	-2.2108	-0.0655
ILMN_1703229	0.3982	0.00521	2.90506	-2.21212	0.255
ILMN_1868623	0.3982	0.00522	2.90418	-2.21421	0.055
ILMN_1725702	0.3982	0.00525	-2.90249	-2.21821	-0.0588
ILMN_1905008	0.3982	0.00527	2.90068	-2.22248	0.0587
ILMN_1867696	0.3982	0.00529	2.89956	-2.22514	0.0519
ILMN_1651536	0.3982	0.00533	-2.89687	-2.23149	-0.0659
ILMN_1879577	0.3982	0.00541	-2.89159	-2.24393	-0.0589
ILMN_1665515	0.3982	0.00544	2.8897	-2.24839	0.0673
ILMN_1688126	0.3982	0.00545	-2.88898	-2.25009	-0.472
ILMN_1914691	0.3999	0.00551	2.88499	-2.25948	0.0507
ILMN_1895029	0.4056	0.00569	2.8734	-2.2867	0.0474
ILMN_1691787	0.4062	0.00572	2.87156	-2.29103	0.158
ILMN_1908640	0.4062	0.00574	-2.87019	-2.29423	-0.0496
ILMN_1716988	0.4062	0.00579	2.86713	-2.30141	0.522
ILMN_1651380	0.4062	0.00581	2.86587	-2.30436	0.0472
ILMN_1904809	0.4062	0.00582	-2.86513	-2.30609	-0.0535
ILMN_1897094	0.4062	0.00587	2.86162	-2.31431	0.0557
ILMN_1774674	0.4065	0.00591	-2.85969	-2.31882	-0.0569
ILMN_1806813	0.408	0.00597	2.85568	-2.3282	0.0569
ILMN_1855682	0.408	0.00598	2.85492	-2.32997	0.0789
ILMN_1778543	0.408	0.00601	2.85324	-2.3339	0.233
ILMN_1912695	0.408	0.00602	-2.85257	-2.33544	-0.0581
ILMN_1811858	0.4081	0.00605	2.8506	-2.34004	0.0677
ILMN_1873389	0.4101	0.00617	2.84398	-2.35549	0.0578
ILMN_1908842	0.4101	0.00618	2.84335	-2.35694	0.0587
ILMN_1889229	0.4101	0.00623	-2.84049	-2.36359	-0.522
ILMN_1704789	0.4119	0.00633	2.83463	-2.37722	0.0599
ILMN_1774480	0.4122	0.00635	2.83315	-2.38067	0.0836
ILMN_1685097	0.4131	0.00638	2.83142	-2.38467	0.388
ILMN_1829068	0.4145	0.00646	2.82709	-2.39473	0.0508
ILMN_1717733	0.416	0.00656	2.82113	-2.40854	0.0483
ILMN_1671442	0.4162	0.0066	2.81896	-2.41354	0.249
ILMN_1874815	0.4162	0.00662	-2.81814	-2.41544	-0.194
ILMN_1911207	0.4166	0.00664	2.81673	-2.4187	0.0628
ILMN_1671510	0.4166	0.00669	2.81426	-2.42441	0.0531
ILMN_1890000	0.4166	0.00675	2.8109	-2.43218	0.0885
ILMN_1876404	0.4166	0.00676	2.81018	-2.43384	0.0516
ILMN_1720024	0.4166	0.00678	-2.80919	-2.43612	-0.142
ILMN_1704029	0.4168	0.0068	2.80827	-2.43825	0.0455
ILMN_1706612	0.4177	0.00683	-2.80632	-2.44275	-0.393
ILMN_1904486	0.4177	0.00684	2.80597	-2.44356	0.0438
ILMN_1804798	0.4235	0.00705	-2.7951	-2.46859	-0.712
ILMN_1671856	0.4236	0.00711	2.79168	-2.47645	0.0488
ILMN_1699521	0.4246	0.00726	-2.78403	-2.49399	-0.682
ILMN_1916434	0.4246	0.00727	2.78354	-2.49512	0.0465
ILMN_1664307	0.4246	0.00727	-2.78352	-2.49517	-0.0535
ILMN_1656900	0.4246	0.0073	-2.78199	-2.49866	-0.448
ILMN_1773222	0.4246	0.00738	-2.77811	-2.50755	-0.089
ILMN_1861461	0.4246	0.00742	2.77583	-2.51278	0.0516
ILMN_1826057	0.4246	0.00748	2.77288	-2.51952	0.0688
ILMN_1871235	0.4246	0.00756	2.76909	-2.52817	0.0516
ILMN_1712784	0.4246	0.00758	2.76803	-2.53061	0.0638
ILMN_1844834	0.4248	0.00761	2.76678	-2.53344	0.0552
ILMN_1660964	0.4295	0.00785	2.75512	-2.56002	0.054
ILMN_1691217	0.4295	0.00786	-2.75475	-2.56086	-0.0641
ILMN_1664231	0.4311	0.00796	2.74977	-2.57217	0.407
ILMN_1820628	0.4329	0.00805	2.74601	-2.5807	0.0502
ILMN_2336133	0.437	0.00824	-2.7372	-2.60067	-0.345
ILMN_1890463	0.437	0.00825	2.73678	-2.60162	0.0423
ILMN_1824982	0.437	0.00826	-2.73621	-2.60292	-0.0426
ILMN_1909681	0.437	0.00832	2.73366	-2.60867	0.0572
ILMN_1897224	0.437	0.00835	-2.73225	-2.61186	-0.0489
ILMN_1867076	0.437	0.00838	-2.73099	-2.61471	-0.045
ILMN_1699340	0.4376	0.00843	2.72863	-2.62005	0.0562
ILMN_1846462	0.4393	0.00854	-2.72363	-2.63134	-0.0597
ILMN_1915608	0.4394	0.00855	2.72311	-2.63251	0.101
ILMN_1770896	0.44	0.0086	2.72136	-2.63646	0.0507
ILMN_1655365	0.44	0.00864	-2.71923	-2.64125	-0.0928
ILMN_1807393	0.44	0.00871	2.71646	-2.64748	0.0535
ILMN_1731123	0.44	0.00873	2.7157	-2.64921	0.0897
ILMN_1899407	0.44	0.00876	-2.71417	-2.65263	-0.406
ILMN_1916254	0.44	0.0088	-2.71243	-2.65654	-0.046
ILMN_1700076	0.44	0.00881	2.71211	-2.65727	0.0597
ILMN_1687724	0.44	0.00882	2.71147	-2.65871	0.154
ILMN_1834456	0.44	0.00888	2.70907	-2.6641	0.0521
ILMN_1819071	0.44	0.00891	2.70768	-2.66722	0.0547
ILMN_1707689	0.4401	0.00895	2.70607	-2.67084	0.194
ILMN_1797942	0.4401	0.00897	-2.70522	-2.67274	-0.0499
ILMN_1699253	0.4401	0.00899	2.70459	-2.67415	0.384
ILMN_1754757	0.4408	0.00906	-2.70167	-2.68071	-0.531
ILMN_1815313	0.4414	0.00912	2.69913	-2.68639	0.206
ILMN_1684704	0.4417	0.00922	-2.69496	-2.69574	-0.0768
ILMN_1679280	0.4425	0.00926	2.69337	-2.69929	0.477
ILMN_1878811	0.4433	0.00932	2.69085	-2.70491	0.0582
ILMN_1697665	0.4436	0.00936	2.68932	-2.70834	0.272
ILMN_1735176	0.4436	0.00936	-2.68922	-2.70856	-0.0484
ILMN_1852842	0.4442	0.00942	-2.68685	-2.71384	-0.0525
ILMN_1911667	0.4442	0.00943	2.68669	-2.71421	0.054
ILMN_1657442	0.4442	0.00943	2.68639	-2.71487	0.0741
ILMN_1843080	0.4445	0.00947	2.68482	-2.71839	0.0509
ILMN_1907241	0.4449	0.0095	2.68376	-2.72074	0.0509
ILMN_1690320	0.4449	0.00952	-2.68306	-2.72231	-0.328
ILMN_2353110	0.4459	0.0096	-2.67973	-2.72973	-0.047
ILMN_1904836	0.4463	0.00963	2.67867	-2.7321	0.0497
ILMN_1825996	0.4473	0.00966	-2.67747	-2.73476	-0.0518
ILMN_1916717	0.4475	0.00973	2.67472	-2.74089	0.0518
ILMN_1830913	0.4475	0.00977	-2.6733	-2.74404	-0.035
ILMN_1882394	0.4486	0.00982	2.67138	-2.74831	0.047
ILMN_1748607	0.4492	0.00986	2.66982	-2.75178	0.0762
ILMN_1769592	0.4498	0.00991	2.66796	-2.75591	0.0711
ILMN_1772292	0.4512	0.00995	2.66631	-2.75956	0.155
ILMN_2374633	0.4519	0.00998	2.66498	-2.76253	0.317
ILMN_2094776	0.4525	0.0101	-2.66246	-2.76811	-0.351	CCNL1	cyclin L1
ILMN_1769013	0.4527	0.0101	-2.6618	-2.76956	-0.32	ASGR1	asialoglycoprotein receptor 1
ILMN_1789732	0.4527	0.0101	2.66125	-2.77078	0.176	TMEM189	transmembrane protein 189
ILMN_1668743	0.4527	0.0101	-2.66077	-2.77185	-0.319	RILPL2	Rab interacting lysosomal protein like 2
ILMN_1655482	0.4527	0.0101	2.66075	-2.7719	0.246	TRIM27	tripartite motif containing 27
ILMN_1656182	0.4527	0.0101	-2.66042	-2.77262	-0.0685
ILMN_1658405	0.4527	0.0101	2.65951	-2.77463	0.0456
ILMN_2390853	0.4527	0.0101	-2.65929	-2.77512	-0.694	CTSH	cathepsin H
ILMN_1762678	0.4527	0.0101	-2.65928	-2.77516	-0.397	NMT1	N-myristoyltransferase 1
ILMN_1795703	0.4527	0.0101	2.65897	-2.77584	0.209	GET4	golgi to ER traffic protein 4
ILMN_1707464	0.4527	0.0101	-2.65874	-2.77635	-0.944	MST1	macrophage stimulating 1
ILMN_1788213	0.4527	0.0102	2.65812	-2.77772	0.404	FRAT2	frequently rearranged in advanced T-cell lymphomas 2
ILMN_1670844	0.4527	0.0102	2.65782	-2.77839	0.241	OPN3	opsin 3
ILMN_1729237	0.4527	0.0102	-2.65718	-2.77979	-0.472	CYB5R1	cytochrome b5 reductase 1
ILMN_1669722	0.4527	0.0102	2.65707	-2.78004	0.193	LRRC61	leucine rich repeat containing 61
ILMN_2396571	0.4527	0.0102	-2.65705	-2.78009	-0.269	GPR108	G protein-coupled receptor 108
ILMN_1782504	0.4539	0.0102	2.65569	-2.7831	0.329	MTERF3	mitochondrial transcription termination factor 3
ILMN_1746408	0.4541	0.0103	-2.65489	-2.78487	-0.294	MIDN	midnolin
ILMN_1849877	0.4541	0.0103	-2.65487	-2.78492	-0.0504
ILMN_1758523	0.4548	0.0103	-2.65395	-2.78694	-0.737	ABCA3	ATP binding cassette subfamily A member 3
ILMN_1823282	0.4553	0.0103	2.65313	-2.78876	0.0558
ILMN_1801313	0.456	0.0103	2.65201	-2.79124	0.252	SIAH2	siah E3 ubiquitin protein ligase 2
ILMN_1864939	0.456	0.0103	-2.65153	-2.79229	-0.0414	LOC100505625	uncharacterized LOC100505625
ILMN_1746676	0.456	0.0104	2.65118	-2.79306	0.372	CLDN8	claudin 8
ILMN_1915012	0.456	0.0104	-2.65092	-2.79365	-0.0551
ILMN_2053415	0.456	0.0104	-2.65052	-2.79452	-0.633	LDLR	low density lipoprotein receptor
ILMN_1891021	0.456	0.0104	-2.65026	-2.7951	-0.0519
ILMN_1706478	0.456	0.0104	2.65016	-2.79531	0.0713	HOXA7	homeobox A7
ILMN_1701464	0.4564	0.0104	-2.64947	-2.79684	-0.125	ZNF776	zinc finger protein 776
ILMN_1748792	0.4564	0.0104	2.64918	-2.79748	0.0498	SCN5A	sodium voltage-gated channel alpha subunit 5
ILMN_1744711	0.4567	0.0104	2.64856	-2.79885	0.0678
ILMN_1654385	0.4577	0.0105	2.64691	-2.80249	0.244	ASB13	ankyrin repeat and SOCS box containing 13
ILMN_1794505	0.4577	0.0105	2.64676	-2.80284	0.332	SHFM1	split hand/foot malformation (ectrodactyly) type 1
ILMN_1883364	0.4577	0.0105	-2.6467	-2.80296	-0.0561
ILMN_2389970	0.4578	0.0105	-2.6463	-2.80384	-0.152
ILMN_1698715	0.4579	0.0105	2.64589	-2.80474	0.228	NHLRC2	NHL repeat containing 2
ILMN_1796288	0.4582	0.0105	2.64531	-2.80603	0.137	COL5A3	collagen type V alpha 3 chain
ILMN_1713759	0.4582	0.0105	-2.6447	-2.80738	-0.305	UBE2J1	ubiquitin conjugating enzyme E2 J1
ILMN_2326282	0.4582	0.0105	-2.64455	-2.8077	-0.318	TMEM259	transmembrane protein 259
ILMN_2408938	0.4583	0.0106	2.64376	-2.80943	0.407	LRRC20	leucine rich repeat containing 20
ILMN_1681269	0.4583	0.0106	-2.6433	-2.81045	-0.366	DYRK4	dual specificity tyrosine phosphorylation regulated kinase 4
ILMN_1761733	0.4583	0.0106	-2.64294	-2.81125	-0.613	HLA-DMB	major histocompatibility complex, class II, DM beta
ILMN_1867964	0.4583	0.0106	-2.64222	-2.81283	-0.0643
ILMN_1796210	0.4583	0.0106	2.64201	-2.8133	0.241	PPRC1	peroxisome proliferator-activated receptor gamma, coactivator-related 1
ILMN_1757627	0.4583	0.0106	2.6418	-2.81376	0.278	ZMYND19	zinc finger MYND-type containing 19
ILMN_1768575	0.4583	0.0106	-2.64164	-2.81413	-1.26	SFTPD	surfactant protein D
ILMN_1758941	0.4583	0.0106	-2.64145	-2.81454	-0.413	REEP5	receptor accessory protein 5
ILMN_2159471	0.4583	0.0106	2.64125	-2.81498	0.0663	GEMIN8P4	gem nuclear organelle associated protein 8 pseudogene 4
ILMN_1666594	0.4583	0.0106	-2.6411	-2.81531	-0.54	IRF8	interferon regulatory factor 8
ILMN_2259292	0.4599	0.0107	2.63929	-2.81929	0.103	CCZ1	CCZ1 homolog, vacuolar protein trafficking and biogenesis associated
ILMN_1780306	0.4599	0.0107	2.63904	-2.81985	0.051	DDHD1	DDHD domain containing 1
ILMN_1748272	0.4599	0.0107	-2.63871	-2.82058	-0.0519
ILMN_2153916	0.4599	0.0107	2.6385	-2.82104	0.632	HSPA2	heat shock protein family A (Hsp70) member 2
ILMN_1856263	0.4599	0.0107	2.63814	-2.82182	0.0809
ILMN_1912805	0.4611	0.0108	-2.63661	-2.8252	-0.0511
ILMN_2225254	0.4611	0.0108	2.6363	-2.82586	0.094	ZNF740	zinc finger protein 740
ILMN_1665538	0.4611	0.0108	2.63591	-2.82673	0.513	SKP2	S-phase kinase-associated protein 2, E3 ubiquitin protein ligase
ILMN_2375386	0.4611	0.0108	2.63576	-2.82706	0.193	RNPS1	RNA binding protein with serine rich domain 1
ILMN_2176592	0.4612	0.0108	-2.63463	-2.82954	-0.295	BCHE	butyrylcholinesterase
ILMN_1802819	0.4612	0.0108	2.63453	-2.82976	0.159	DEPDC1	DEP domain containing 1
ILMN_1696243	0.4612	0.0108	-2.63445	-2.82995	-0.513	STMND1	stathmin domain containing 1
ILMN_1736567	0.4612	0.0108	-2.63402	-2.83089	-0.595	CD74	CD74 molecule
ILMN_1777444	0.4612	0.0108	2.6337	-2.8316	0.192	STX5	syntaxin 5
ILMN_1796180	0.4612	0.0108	-2.63367	-2.83166	-0.407	CRY2	cryptochrome circadian clock 2
ILMN_1768293	0.4626	0.0109	2.63218	-2.83493	0.445	NUP155	nucleoporin 155
ILMN_2112301	0.4629	0.0109	2.63139	-2.83667	0.36	DRAP1	DR1 associated protein 1
ILMN_1713688	0.4629	0.0109	-2.63081	-2.83795	-0.355	DHX32	DEAH-box helicase 32 (putative)
ILMN_1727055	0.4629	0.0109	2.63013	-2.83944	0.291	PARPBP	PARP1 binding protein
ILMN_1685709	0.4629	0.0109	-2.63004	-2.83963	-0.621	TMEM125	transmembrane protein 125
ILMN_2246510	0.4629	0.0109	-2.62993	-2.83987	-0.341	TSC1	tuberous sclerosis 1
ILMN_1791217	0.4629	0.011	-2.62957	-2.84067	-0.202	STRIP1	striatin interacting protein 1
ILMN_1691953	0.4629	0.011	2.62908	-2.84175	0.0528	SPANXN3	SPANX family member N3
ILMN_2407168	0.4629	0.011	-2.62842	-2.8432	-0.564	S100A13	S100 calcium binding protein A13
ILMN_1817671	0.4629	0.011	2.6283	-2.84345	0.0464	LOC101927549	uncharacterized LOC101927549
ILMN_1766435	0.4629	0.011	2.62819	-2.8437	0.337	WBP11	WW domain binding protein 11
ILMN_1680652	0.4629	0.011	-2.62791	-2.8443	-0.779	SELENBP1	selenium binding protein 1
ILMN_1776173	0.4629	0.011	2.6277	-2.84477	0.38	PSMD7	proteasome 26S subunit, non-ATPase 7
ILMN_2380418	0.4629	0.011	2.62749	-2.84522	0.307	BICD2	BICD cargo adaptor 2
ILMN_2413899	0.4629	0.011	2.6272	-2.84588	0.144	MCM10	minichromosome maintenance 10 replication initiation factor
ILMN_1753196	0.4629	0.0111	2.6263	-2.84785	0.523	PTTG1	pituitary tumor-transforming 1
ILMN_2339796	0.4629	0.0111	-2.62621	-2.84803	-0.283	CDC16	cell division cycle 16
ILMN_2323048	0.4629	0.0111	-2.62617	-2.84812	-0.275	ERP29	endoplasmic reticulum protein 29
ILMN_1708147	0.4629	0.0111	2.62606	-2.84836	0.263	TBPL1	TATA-box binding protein like 1
ILMN_2116605	0.463	0.0111	2.62504	-2.85061	0.0489	COL19A1	collagen type XIX alpha 1 chain
ILMN_1869439	0.463	0.0111	-2.62453	-2.85172	-0.0559
ILMN_1658158	0.463	0.0111	2.62446	-2.85188	0.0543	ZNF501	zinc finger protein 501
ILMN_1797744	0.463	0.0111	-2.62443	-2.85195	-0.725	TPPP3	tubulin polymerization promoting protein family member 3
ILMN_1862046	0.463	0.0111	2.62431	-2.85221	0.0466
ILMN_2247572	0.4635	0.0111	2.62358	-2.8538	0.443	SSX1	SSX family member 1
ILMN_1873464	0.4636	0.0111	2.62319	-2.85466	0.0444
ILMN_1737681	0.4643	0.0112	-2.62229	-2.85663	-0.0611	NEK10	NIMA related kinase 10
ILMN_1731749	0.4646	0.0112	2.62169	-2.85795	0.0584
ILMN_1692620	0.4647	0.0112	-2.62131	-2.85877	-0.279	ZNF263	zinc finger protein 263
ILMN_1764769	0.4647	0.0112	-2.62081	-2.85987	-0.284	VWA5A	von Willebrand factor A domain containing 5A
ILMN_1712026	0.4647	0.0112	-2.62066	-2.86021	-0.313	NLRP3	NLR family pyrin domain containing 3
ILMN_1686370	0.465	0.0112	-2.61955	-2.86264	-0.114	PHYKPL	5-phosphohydroxy-L-lysine phospho-lyase
ILMN_1822971	0.465	0.0112	-2.61951	-2.86273	-0.116
ILMN_1771903	0.465	0.0113	2.61942	-2.86293	0.385	NUP37	nucleoporin 37
ILMN_2365711	0.4662	0.0113	-2.61735	-2.86745	-0.334	2019-09-02	septin 2
ILMN_1821120	0.4662	0.0113	2.61718	-2.86782	0.0498
ILMN_1797557	0.4662	0.0113	-2.61716	-2.86786	-0.504	PLEKHA6	pleckstrin homology domain containing A6
ILMN_1683824	0.4662	0.0113	2.6171	-2.86799	0.202	ANO7	anoctamin 7
ILMN_1795811	0.4668	0.0114	-2.61559	-2.87131	-0.0679	ASB2	ankyrin repeat and SOCS box containing 2
ILMN_1851497	0.4668	0.0114	2.6154	-2.87172	0.038
ILMN_1692664	0.4668	0.0114	2.61531	-2.87191	0.333	PRR5	proline rich 5
ILMN_1820906	0.4668	0.0114	-2.61487	-2.87288	-0.0617
ILMN_2363489	0.4668	0.0114	2.61421	-2.87431	0.341	BRE	brain and reproductive organ-expressed (TNFRSF1A modulator)
ILMN_1661170	0.4668	0.0114	2.61412	-2.8745	0.208	NDUFB8	NADH:ubiquinone oxidoreductase subunit B8
ILMN_2329834	0.4668	0.0114	2.61333	-2.87623	0.283	RBM12	RNA binding motif protein 12
ILMN_1675936	0.4668	0.0114	-2.61304	-2.87687	-0.363	HIGD1B	HIG1 hypoxia inducible domain family member 1B
ILMN_1815500	0.4668	0.0115	-2.61255	-2.87795	-0.455	ITPR3	inositol 1,4,5-trisphosphate receptor type 3
ILMN_1891583	0.4668	0.0115	-2.61235	-2.87839	-0.0471
ILMN_1693039	0.4668	0.0115	2.61228	-2.87853	0.212	ZFPL1	zinc finger protein like 1
ILMN_1676099	0.4668	0.0115	-2.61206	-2.87902	-0.268	SPON2	spondin 2
ILMN_1861742	0.4668	0.0115	-2.61092	-2.8815	-0.0577
ILMN_2121389	0.4668	0.0115	2.61078	-2.88181	0.06	ACOT1	acyl-CoA thioesterase 1
ILMN_2375319	0.4668	0.0115	-2.61058	-2.88224	-0.222
ILMN_1801491	0.4668	0.0115	-2.61038	-2.88268	-0.143	SLC26A2	solute carrier family 26 member 2
ILMN_1798172	0.4668	0.0115	2.61022	-2.88304	0.315	IPO4	importin 4
ILMN_1788629	0.4668	0.0115	2.60995	-2.88361	0.101
ILMN_1692219	0.4668	0.0115	-2.60984	-2.88387	-0.549	RAB11FIP1	RAB11 family interacting protein 1
ILMN_1785486	0.4668	0.0115	2.60966	-2.88426	0.0545	ERG	ERG, ETS transcription factor
ILMN_1753063	0.4668	0.0115	2.60959	-2.88441	0.324	KIF15	kinesin family member 15
ILMN_1662091	0.4668	0.0116	2.6094	-2.88482	0.0663	MROH5	maestro heat like repeat family member 5
ILMN_1714515	0.4668	0.0116	2.60925	-2.88516	0.392	MRPS12	mitochondrial ribosomal protein S12
ILMN_1870717	0.4668	0.0116	2.6088	-2.88613	0.0581	LINC01165	long intergenic non-protein coding RNA 1165
ILMN_1804568	0.4668	0.0116	2.60833	-2.88715	0.11	HOMER1	homer scaffolding protein 1
ILMN_1886655	0.4668	0.0116	-2.60775	-2.88841	-0.608
ILMN_1683596	0.4668	0.0116	2.60774	-2.88844	0.0568
ILMN_2120340	0.4668	0.0116	2.60693	-2.89021	0.322	RUVBL2	RuvB like AAA ATPase 2
ILMN_1677018	0.4668	0.0116	2.60674	-2.89063	0.227	HOXA4	homeobox A4
ILMN_1680430	0.4668	0.0116	-2.6066	-2.89093	-0.0811	TSGA10	testis specific 10
ILMN_2204826	0.4668	0.0116	-2.60653	-2.89108	-0.0533	SEPP1	selenoprotein P, plasma, 1
ILMN_1899936	0.4668	0.0116	2.60637	-2.89143	0.0507	TMEM99	transmembrane protein 99
ILMN_1669062	0.4668	0.0117	-2.60595	-2.89234	-0.0911
ILMN_1725414	0.4668	0.0117	-2.60533	-2.89371	-0.12	ABCC6	ATP binding cassette subfamily C member 6
ILMN_1710676	0.4668	0.0117	2.60497	-2.89448	0.306	FBXO5	F-box protein 5
ILMN_1874172	0.4668	0.0117	-2.6048	-2.89486	-0.0782
ILMN_1746618	0.4668	0.0117	-2.60479	-2.89487	-0.386	PAQR7	progestin and adipoQ receptor family member 7
ILMN_1785179	0.4681	0.0117	-2.60342	-2.89786	-0.487	UBE2G2	ubiquitin conjugating enzyme E2 G2
ILMN_1653018	0.4681	0.0117	2.60292	-2.89896	0.0489	TMEM232	transmembrane protein 232
ILMN_2387636	0.4681	0.0118	2.60256	-2.89973	0.298
ILMN_1722292	0.4681	0.0118	2.6025	-2.89987	0.326	AVL9	AVL9 cell migration associated
ILMN_1791436	0.4688	0.0118	-2.6016	-2.90183	-0.0804	EZH1	enhancer of zeste 1 polycomb repressive complex 2 subunit
ILMN_2407669	0.4689	0.0118	-2.6012	-2.90269	-0.122	PEAR1	platelet endothelial aggregation receptor 1
ILMN_1866152	0.4695	0.0118	2.60013	-2.90503	0.067
ILMN_1690442	0.4695	0.0118	2.6	-2.90532	0.459	TMEM241	transmembrane protein 241
ILMN_1659976	0.4695	0.0119	2.5994	-2.90662	0.189	CLP1	cleavage and polyadenylation factor I subunit 1
ILMN_2043816	0.4695	0.0119	2.59907	-2.90734	0.279	ARPC5L	actin related protein 2/3 complex subunit 5 like
ILMN_1783712	0.4695	0.0119	2.59893	-2.90764	0.211	KNOP1	lysine rich nucleolar protein 1
ILMN_2359306	0.4695	0.0119	-2.59887	-2.90776	-0.322	CAPSL	calcyphosine like
ILMN_1745119	0.4695	0.0119	2.59852	-2.90854	0.345	MPLKIP	M-phase specific PLK1 interacting protein
ILMN_1654721	0.4712	0.0119	2.59689	-2.91209	0.0442
ILMN_1809612	0.4712	0.0119	2.59656	-2.9128	0.0788	SSMEM1	serine rich single-pass membrane protein 1
ILMN_1863253	0.4725	0.012	2.59518	-2.91579	0.0501
ILMN_1791211	0.4727	0.012	-2.59462	-2.91701	-0.23	DOK2	docking protein 2
ILMN_1875578	0.4727	0.012	2.59436	-2.91758	0.0468
ILMN_1778381	0.4734	0.012	2.59315	-2.9202	0.259
ILMN_2408851	0.4734	0.0121	-2.59272	-2.92114	-0.326	ARHGAP30	Rho GTPase activating protein 30
ILMN_2262901	0.4734	0.0121	-2.59245	-2.92172	-0.307	RUFY3	RUN and FYVE domain containing 3
ILMN_2083333	0.4734	0.0121	2.59197	-2.92276	0.24
ILMN_1742935	0.4734	0.0121	-2.59162	-2.92352	-0.319	ZNF33B	zinc finger protein 33B
ILMN_2131936	0.4734	0.0121	2.59159	-2.92359	0.0731	ATAD3B	ATPase family, AAA domain containing 3B
ILMN_1704812	0.4734	0.0121	2.59126	-2.92431	0.0653
ILMN_1746013	0.4734	0.0121	2.59122	-2.92439	0.652	SPOCK1	sparc/osteonectin, cwcv and kazal-like domains proteoglycan (testican) 1
ILMN_1748473	0.4734	0.0121	-2.5906	-2.92574	-0.488	GIMAP4	GTPase, IMAP family member 4
ILMN_2160929	0.4734	0.0121	2.59052	-2.92593	0.478	FEN1	flap structure-specific endonuclease 1
ILMN_2062754	0.4734	0.0121	-2.5902	-2.92661	-0.218	SRA1	steroid receptor RNA activator 1
ILMN_1754051	0.4734	0.0121	2.59009	-2.92685	0.25	RMI1	RecQ mediated genome instability 1
ILMN_2331010	0.4735	0.0122	-2.58954	-2.92804	-0.133	TNFRSF10B	TNF receptor superfamily member 10b
ILMN_1700888	0.4735	0.0122	2.58936	-2.92843	0.105	ENPP1	ectonucleotide pyrophosphatase/phosphodiesterase 1
ILMN_2154287	0.4735	0.0122	-2.58908	-2.92904	-0.313	ACCS	1-aminocyclopropane-1-carboxylate synthase homolog (inactive)
ILMN_1714700	0.4738	0.0122	-2.58854	-2.93021	-0.445	TRIB2	tribbles pseudokinase 2
ILMN_1780667	0.4744	0.0122	2.58774	-2.93196	0.528	POC1A	POC1 centriolar protein A
ILMN_1699648	0.4749	0.0123	-2.58651	-2.93462	-0.0704	ZNF516	zinc finger protein 516
ILMN_1738249	0.4749	0.0123	2.58646	-2.93472	0.0631
ILMN_1812226	0.4749	0.0123	-2.5864	-2.93485	-0.294	ICAM1	intercellular adhesion molecule 1
ILMN_1716006	0.4749	0.0123	2.58609	-2.93552	0.091	C18orf54	chromosome 18 open reading frame 54
ILMN_1849197	0.4749	0.0123	-2.58579	-2.93617	-0.039
ILMN_1692486	0.4763	0.0123	2.58416	-2.93972	0.25	ZNRD1	zinc ribbon domain containing 1
ILMN_1663493	0.4763	0.0123	2.58374	-2.94063	0.234	CCZ1B	CCZ1 homolog B, vacuolar protein trafficking and biogenesis associated
ILMN_1909093	0.4763	0.0124	-2.5835	-2.94113	-0.057
ILMN_2068274	0.4763	0.0124	-2.58343	-2.9413	-0.056	CLEC9A	C-type lectin domain family 9 member A
ILMN_1751081	0.4768	0.0124	2.58274	-2.94277	0.192	EHMT2	euchromatic histone lysine methyltransferase 2
ILMN_1684168	0.4771	0.0124	-2.58217	-2.94402	-0.0901
ILMN_1794374	0.4772	0.0124	2.58182	-2.94477	0.0575
ILMN_1676408	0.478	0.0124	-2.58084	-2.9469	-0.0827	TAGAP	T-cell activation RhoGTPase activating protein
ILMN_1730032	0.4782	0.0125	-2.58015	-2.94838	-0.452	BOK	BOK, BCL2 family apoptosis regulator
ILMN_1785570	0.4782	0.0125	-2.57975	-2.94925	-0.287	SUSD3	sushi domain containing 3
ILMN_1776850	0.4782	0.0125	2.57973	-2.94929	0.111
ILMN_1772218	0.4782	0.0125	-2.57951	-2.94976	-0.691	HLA-DPA1	major histocompatibility complex, class II, DP alpha 1
ILMN_2332105	0.4787	0.0125	2.57839	-2.95219	0.422	WRNIP1	Werner helicase interacting protein 1
ILMN_1665795	0.4787	0.0125	2.57817	-2.95267	0.0562
ILMN_1871395	0.4787	0.0125	-2.57806	-2.95291	-0.0528
ILMN_1715318	0.4787	0.0125	-2.57787	-2.95331	-0.0791
ILMN_1790971	0.4787	0.0125	2.57756	-2.95399	0.173
ILMN_1800520	0.479	0.0126	2.57674	-2.95576	0.049	LOC401357	uncharacterized LOC401357
ILMN_1769734	0.479	0.0126	2.57646	-2.95637	0.384	NT5C3A	5'-nucleotidase, cytosolic IIIA
ILMN_1766038	0.479	0.0126	-2.57625	-2.95682	-0.318	C11orf88	chromosome 11 open reading frame 88
ILMN_1740597	0.479	0.0126	2.57608	-2.95719	0.0591	CDKN2D	cyclin dependent kinase inhibitor 2D
ILMN_1781614	0.4801	0.0126	-2.5747	-2.96016	-0.0497	GAS6	growth arrest specific 6
ILMN_1731928	0.4801	0.0126	-2.57437	-2.96089	-0.144	LY9	lymphocyte antigen 9
ILMN_2043265	0.4801	0.0127	-2.57432	-2.96099	-0.333	ZNF106	zinc finger protein 106
ILMN_1712308	0.4804	0.0127	2.57378	-2.96216	0.0665	FSTL4	follistatin like 4
ILMN_1692368	0.4808	0.0127	2.57317	-2.96348	0.0547	DLX2	distal-less homeobox 2
ILMN_1806109	0.4809	0.0127	-2.57239	-2.96517	-0.0445
ILMN_1792088	0.4809	0.0127	2.57208	-2.96582	0.0932	C1orf101	chromosome 1 open reading frame 101
ILMN_1782579	0.4809	0.0127	2.57203	-2.96593	0.293	IMMT	inner membrane mitochondrial protein
ILMN_1746349	0.4809	0.0127	2.57183	-2.96636	0.0696	TSPAN19	tetraspanin 19
ILMN_1712413	0.4809	0.0127	2.57151	-2.96707	0.61	RPL39L	ribosomal protein L39 like
ILMN_1778677	0.4809	0.0128	2.57086	-2.96847	0.25	MRS2	MRS2, magnesium transporter
ILMN_1749612	0.4809	0.0128	2.57075	-2.96871	0.256	IMMP1L	inner mitochondrial membrane peptidase subunit 1
ILMN_1727709	0.4809	0.0128	-2.57072	-2.96877	-0.12	GPBAR1	G protein-coupled bile acid receptor 1
ILMN_1897891	0.4814	0.0128	-2.56996	-2.97041	-0.0489
ILMN_1700985	0.4817	0.0128	-2.56943	-2.97154	-0.0533	PRDM5	PR/SET domain 5
ILMN_1907206	0.4817	0.0128	2.56885	-2.9728	0.0574
ILMN_1871316	0.4817	0.0128	-2.56863	-2.97327	-0.06
ILMN_1695263	0.4817	0.0128	2.56854	-2.97348	0.0375	SH2D5	SH2 domain containing 5
ILMN_1716815	0.4817	0.0129	-2.56823	-2.97413	-0.721	CEACAM1	carcinoembryonic antigen related cell adhesion molecule 1
ILMN_1718219	0.4817	0.0129	-2.56795	-2.97474	-0.0582	OR13H1	olfactory receptor family 13 subfamily H member 1
ILMN_2160476	0.4819	0.0129	-2.56744	-2.97584	-0.584	CCL22	C-C motif chemokine ligand 22
ILMN_2337492	0.4819	0.0129	2.56723	-2.9763	0.247	RCE1	Ras converting CAAX endopeptidase 1
ILMN_1797209	0.4819	0.0129	2.56643	-2.97802	0.25	CEP41	centrosomal protein 41
ILMN_1770084	0.4819	0.0129	-2.56641	-2.97805	-0.469	TACC1	transforming acidic coiled-coil containing protein 1
ILMN_1741148	0.4819	0.0129	2.5661	-2.97873	0.375	ALDOA	aldolase, fructose-bisphosphate A
ILMN_2294431	0.4819	0.0129	2.56589	-2.97917	0.114	CDC25C	cell division cycle 25C
ILMN_1711988	0.4819	0.0129	2.56575	-2.97948	0.794	KCNK12	potassium two pore domain channel subfamily K member 12
ILMN_2415170	0.4819	0.0129	-2.5654	-2.98024	-0.133	VPS8	VPS8, CORVET complex subunit
ILMN_1891711	0.4819	0.013	2.56513	-2.98081	0.0704
ILMN_1723165	0.4826	0.013	2.56428	-2.98264	0.138
ILMN_1738009	0.4837	0.013	2.5625	-2.98649	0.0428
ILMN_1764314	0.4837	0.013	2.56234	-2.98682	0.336	FGD1	FYVE, RhoGEF and PH domain containing 1
ILMN_1695414	0.4837	0.0131	2.56144	-2.98875	0.465	ASF1B	anti-silencing function 1B histone chaperone
ILMN_1750792	0.4837	0.0131	2.56121	-2.98926	0.126	VAC14	Vac14, PIKFYVE complex component
ILMN_1854717	0.4837	0.0131	2.56067	-2.99041	0.0501
ILMN_1814600	0.4837	0.0131	2.56062	-2.99052	0.0877	DEPDC1B	DEP domain containing 1B
ILMN_1720595	0.4837	0.0131	2.56037	-2.99107	0.123	MDGA1	MAM domain containing glycosylphosphatidylinositol anchor 1
ILMN_1660186	0.4837	0.0131	-2.56015	-2.99152	-0.266	SYF2	SYF2 pre-mRNA splicing factor
ILMN_1827466	0.4837	0.0131	2.55978	-2.99234	0.0522
ILMN_1710629	0.4837	0.0131	2.55977	-2.99234	0.0413	CES5AP1	carboxylesterase 5A pseudogene 1
ILMN_1826921	0.4837	0.0131	-2.55968	-2.99256	-0.389	BLACAT1	bladder cancer associated transcript 1 (non-protein coding)
ILMN_1861045	0.4837	0.0131	-2.55945	-2.99303	-0.0502
ILMN_1802771	0.4837	0.0132	-2.55898	-2.99405	-0.176	C22orf15	chromosome 22 open reading frame 15
ILMN_1718866	0.4837	0.0132	2.55892	-2.99417	0.245	C5orf46	chromosome 5 open reading frame 46
ILMN_1692030	0.4837	0.0132	2.55885	-2.99434	0.0417
ILMN_1709891	0.4837	0.0132	2.5587	-2.99466	0.177
ILMN_1742607	0.4848	0.0132	2.55736	-2.99754	0.128
ILMN_1782006	0.4848	0.0132	-2.55724	-2.99778	-0.0584	NBPF3	neuroblastoma breakpoint family member 3
ILMN_1651557	0.4851	0.0132	2.55651	-2.99935	0.361	KDELC2	KDEL motif containing 2
ILMN_2131493	0.4851	0.0133	2.55631	-2.9998	0.229	MAVS	mitochondrial antiviral signaling protein
ILMN_1707304	0.4851	0.0133	2.55609	-3.00026	0.0651	KLF1	Kruppel like factor 1
ILMN_1801516	0.4853	0.0133	2.55561	-3.0013	0.413	GPC1	glypican 1
ILMN_1693276	0.4858	0.0133	-2.55473	-3.00318	-0.0555
ILMN_1800540	0.4858	0.0133	-2.55459	-3.00347	-0.629	CD55	CD55 molecule (Cromer blood group)
ILMN_1893550	0.4858	0.0133	2.55441	-3.00386	0.0597
ILMN_1667050	0.4858	0.0133	2.55358	-3.00565	0.336	PRPS1	phosphoribosyl pyrophosphate synthetase 1
ILMN_2399489	0.4858	0.0134	2.55329	-3.00627	0.0458	CBFB	core-binding factor beta subunit
ILMN_1655952	0.4858	0.0134	-2.55321	-3.00645	-0.467
ILMN_1849433	0.4858	0.0134	2.553	-3.0069	0.0667
ILMN_1758146	0.4858	0.0134	-2.55286	-3.00719	-0.519	SIRPA	signal regulatory protein alpha
ILMN_1764362	0.4858	0.0134	2.55228	-3.00845	0.296	LYAR	Ly1 antibody reactive
ILMN_1694126	0.4858	0.0134	2.55222	-3.00858	0.221	KIF24	kinesin family member 24
ILMN_1679949	0.4858	0.0134	-2.55199	-3.00907	-0.364	SLC25A23	solute carrier family 25 member 23
ILMN_1704291	0.4858	0.0134	2.55063	-3.01198	0.545
ILMN_1723171	0.4858	0.0135	2.55016	-3.01298	0.0457
ILMN_1766499	0.4858	0.0135	2.54954	-3.01432	0.682	HSPA2	heat shock protein family A (Hsp70) member 2
ILMN_1893247	0.4858	0.0135	2.54915	-3.01515	0.0402
ILMN_1652342	0.4858	0.0135	-2.54913	-3.0152	-0.0577
ILMN_1668185	0.4858	0.0135	2.54884	-3.01582	0.243	ZNF282	zinc finger protein 282
ILMN_1712386	0.4858	0.0135	2.54874	-3.01604	0.186	MIS18A	MIS18 kinetochore protein A
ILMN_1761921	0.4858	0.0135	2.548	-3.01761	0.0698	IL12RB2	interleukin 12 receptor subunit beta 2
ILMN_2396991	0.4858	0.0136	-2.54755	-3.01857	-0.44	HCST	hematopoietic cell signal transducer
ILMN_1881340	0.4858	0.0136	2.54715	-3.01943	0.0539
ILMN_1778890	0.4858	0.0136	2.54669	-3.02042	0.193	LRR1	leucine rich repeat protein 1
ILMN_1895258	0.4858	0.0136	2.54634	-3.02118	0.0503
ILMN_2245305	0.4858	0.0136	2.54631	-3.02124	0.319	ABHD12	abhydrolase domain containing 12
ILMN_1715131	0.4858	0.0136	-2.54595	-3.02201	-0.477	CCR7	C-C motif chemokine receptor 7
ILMN_2069399	0.4858	0.0136	2.54587	-3.02218	0.0447	PGM5P2	phosphoglucomutase 5 pseudogene 2
ILMN_1775188	0.4858	0.0136	-2.54537	-3.02324	-0.0425	DNAAF5	dynein axonemal assembly factor 5
ILMN_2184064	0.4858	0.0136	-2.54529	-3.02341	-0.295	ARRDC4	arrestin domain containing 4
ILMN_2137464	0.4858	0.0136	2.5449	-3.02426	0.237	DVL3	dishevelled segment polarity protein 3
ILMN_1841540	0.4858	0.0137	-2.54474	-3.0246	-0.0383
ILMN_1769839	0.4858	0.0137	-2.5446	-3.02489	-0.0629	L1TD1	LINE1 type transposase domain containing 1
ILMN_1696021	0.4858	0.0137	2.54382	-3.02656	0.439	KPNA6	karyopherin subunit alpha 6
ILMN_1686401	0.4858	0.0137	2.5438	-3.02661	0.307	PDCD2	programmed cell death 2
ILMN_1696311	0.4858	0.0137	2.54351	-3.02724	0.343	IMPAD1	inositol monophosphatase domain containing 1
ILMN_2148847	0.4858	0.0137	2.54318	-3.02793	0.306	AKIRIN2	akirin 2
ILMN_2377288	0.4858	0.0137	2.543	-3.02831	0.0628	CYP3A43	cytochrome P450 family 3 subfamily A member 43
ILMN_1709484	0.4858	0.0137	2.54298	-3.02836	0.208	BLM	Bloom syndrome RecQ like helicase
ILMN_1872506	0.4858	0.0137	-2.54294	-3.02844	-0.0598
ILMN_2412624	0.4858	0.0137	-2.54266	-3.02905	-0.121	TP53I11	tumor protein p53 inducible protein 11
ILMN_1662020	0.4858	0.0137	-2.54259	-3.02919	-0.0485
ILMN_1768488	0.4858	0.0137	2.54259	-3.02921	0.26	TERF2	telomeric repeat binding factor 2
ILMN_1696528	0.4858	0.0137	2.54233	-3.02977	0.0464	TAS2R13	taste 2 receptor member 13
ILMN_1709483	0.4858	0.0138	2.54136	-3.03183	0.16	MRE11A	MRE11 homolog A, double strand break repair nuclease
ILMN_1688240	0.4858	0.0138	2.54121	-3.03215	0.0504	PHOSPHO1	phosphoethanolamine/phosphocholine phosphatase
ILMN_1856706	0.4858	0.0138	-2.54119	-3.0322	-0.0491	LINC01526	long intergenic non-protein coding RNA 1526
ILMN_1676005	0.4858	0.0138	2.54112	-3.03234	0.269	KPNA1	karyopherin subunit alpha 1
ILMN_1677534	0.4858	0.0138	-2.54086	-3.03289	-0.4	SCAP	SREBF chaperone
ILMN_2308849	0.4858	0.0138	-2.54079	-3.03305	-0.491	MYADM	myeloid associated differentiation marker
ILMN_1742618	0.4858	0.0138	-2.54054	-3.03359	-0.713	XAF1	XIAP associated factor 1
ILMN_1660086	0.4858	0.0138	-2.54052	-3.03363	-0.863	MYH11	myosin heavy chain 11
ILMN_1753440	0.4858	0.0138	2.54047	-3.03373	0.334	DCAF16	DDB1 and CUL4 associated factor 16
ILMN_1733859	0.4858	0.0138	2.54024	-3.03422	0.107
ILMN_2224143	0.4858	0.0138	2.53997	-3.0348	0.303	MCM3	minichromosome maintenance complex component 3
ILMN_1763487	0.4858	0.0138	-2.53939	-3.03605	-0.324	CTLA4	cytotoxic T-lymphocyte associated protein 4
ILMN_2413808	0.4858	0.0139	-2.5389	-3.03708	-0.374	CD53	CD53 molecule
ILMN_1814282	0.4858	0.0139	-2.53883	-3.03724	-0.312	AEN	apoptosis enhancing nuclease
ILMN_1771841	0.4858	0.0139	2.53839	-3.03818	0.22	FOSL1	FOS like 1, AP-1 transcription factor subunit
ILMN_2048223	0.4858	0.0139	2.53829	-3.03838	0.0541	TTTY2	testis-specific transcript, Y-linked 2 (non-protein coding)
ILMN_1703843	0.4858	0.0139	2.53804	-3.03894	0.12	RAPH1	Ras association (RalGDS/AF-6) and pleckstrin homology domains 1
ILMN_1688127	0.4858	0.0139	2.53751	-3.04006	0.394
ILMN_2335704	0.4858	0.0139	-2.53736	-3.04038	-0.401	NCF4	neutrophil cytosolic factor 4
ILMN_1815115	0.4858	0.0139	2.53733	-3.04045	0.333	CYC1	cytochrome c1
ILMN_1669921	0.4858	0.0139	2.53685	-3.04147	0.0501	TEX14	testis expressed 14, intercellular bridge forming factor
ILMN_1782633	0.4858	0.0139	2.53637	-3.0425	0.391	BOLA2	bolA family member 2
ILMN_1914354	0.4858	0.014	-2.53583	-3.04366	-0.0536
ILMN_1716298	0.4858	0.014	2.5354	-3.04456	0.0723
ILMN_2284744	0.4858	0.014	-2.53502	-3.04537	-0.455	HNMT	histamine N-methyltransferase
ILMN_1713749	0.4858	0.014	-2.53494	-3.04555	-0.473	CORO1A	coronin 1A
ILMN_1720850	0.4858	0.014	-2.53477	-3.04591	-0.388	BAZ2B	bromodomain adjacent to zinc finger domain 2B
ILMN_1709194	0.4858	0.014	2.53464	-3.04618	0.066	GPR155	G protein-coupled receptor 155
ILMN_1683096	0.4858	0.014	-2.53387	-3.04782	-0.41
ILMN_1835601	0.4858	0.014	2.53363	-3.04835	0.0652
ILMN_1666449	0.4858	0.0141	-2.53346	-3.04871	-0.204	FAM134C	family with sequence similarity 134 member C
ILMN_2102356	0.4858	0.0141	2.53293	-3.04983	0.0422	OR8U9	olfactory receptor family 8 subfamily U member 9
ILMN_1872883	0.4858	0.0141	-2.53282	-3.05007	-0.0486
ILMN_2073010	0.4858	0.0141	2.53272	-3.05029	0.239	TMEM203	transmembrane protein 203
ILMN_2407124	0.4858	0.0141	2.53219	-3.0514	0.23	MCM8	minichromosome maintenance 8 homologous recombination repair factor
ILMN_1850892	0.4858	0.0141	2.53139	-3.05312	0.0483
ILMN_1742473	0.4858	0.0141	-2.53107	-3.0538	-0.117	VSTM4	V-set and transmembrane domain containing 4
ILMN_1761939	0.4858	0.0142	2.53033	-3.05537	0.139	TIPIN	TIMELESS interacting protein
ILMN_1870562	0.4858	0.0142	2.53006	-3.05595	0.0464
ILMN_1785158	0.4858	0.0142	2.52994	-3.0562	0.245	HERPUD2	HERPUD family member 2
ILMN_2390338	0.4858	0.0142	2.52962	-3.05689	0.462	UBE2E3	ubiquitin conjugating enzyme E2 E3
ILMN_1785413	0.4858	0.0142	-2.52936	-3.05744	-0.481	ATP2C2	ATPase secretory pathway Ca2+ transporting 2
ILMN_2266309	0.4858	0.0142	2.52901	-3.05819	0.308	CEPT1	choline/ethanolamine phosphotransferase 1
ILMN_2122952	0.4858	0.0142	2.52863	-3.059	0.4	CISD1	CDGSH iron sulfur domain 1
ILMN_1666503	0.4858	0.0142	-2.52827	-3.05977	-0.457	DENND2A	DENN domain containing 2A
ILMN_1745593	0.4858	0.0143	2.5276	-3.0612	0.186	STMN1	stathmin 1
ILMN_1742544	0.4858	0.0143	-2.52758	-3.06124	-0.377	MEF2C	myocyte enhancer factor 2C
ILMN_1789786	0.4858	0.0143	-2.52756	-3.06127	-0.0823	COA3	cytochrome c oxidase assembly factor 3
ILMN_1746457	0.4858	0.0143	2.52688	-3.06272	0.246	GTF3C2	general transcription factor IIIC subunit 2
ILMN_1659874	0.4858	0.0143	2.52678	-3.06295	0.236	SCAF4	SR-related CTD associated factor 4
ILMN_1685002	0.4858	0.0143	2.52617	-3.06423	0.215	RCE1	Ras converting CAAX endopeptidase 1
ILMN_1874175	0.4858	0.0143	2.52615	-3.06429	0.0451
ILMN_1856633	0.4858	0.0143	2.52592	-3.06476	0.0673
ILMN_1673673	0.4858	0.0143	2.52587	-3.06487	0.45	PBK	PDZ binding kinase
ILMN_1781999	0.4858	0.0143	2.52575	-3.06514	0.324	ABCF2	ATP binding cassette subfamily F member 2
ILMN_1707380	0.4858	0.0143	-2.52549	-3.06569	-0.0894	PRELP	proline and arginine rich end leucine rich repeat protein
ILMN_1733324	0.4858	0.0144	-2.52518	-3.06634	-0.113	ITGB3	integrin subunit beta 3
ILMN_1788387	0.4858	0.0144	-2.5248	-3.06714	-0.339	UGGT2	UDP-glucose glycoprotein glucosyltransferase 2
ILMN_1724738	0.4858	0.0144	2.52416	-3.06852	0.0597	TFR2	transferrin receptor 2
ILMN_1805148	0.4858	0.0144	-2.5239	-3.06907	-0.149	CLHC1	clathrin heavy chain linker domain containing 1
ILMN_1880965	0.4858	0.0144	2.52379	-3.06931	0.0451
ILMN_1677200	0.4858	0.0144	-2.52333	-3.07027	-0.558	CYFIP2	cytoplasmic FMR1 interacting protein 2
ILMN_2061043	0.4858	0.0144	-2.52278	-3.07145	-0.513	CD48	CD48 molecule
ILMN_1713322	0.4858	0.0144	2.5227	-3.07162	0.344	CCZ1B	CCZ1 homolog B, vacuolar protein trafficking and biogenesis associated
ILMN_1762713	0.4858	0.0145	-2.52235	-3.07236	-0.639	MCEMP1	mast cell expressed membrane protein 1
ILMN_2041293	0.4858	0.0145	2.52198	-3.07314	0.505	SQLE	squalene epoxidase
ILMN_1728073	0.4858	0.0145	2.52186	-3.07341	0.17	DENND1A	DENN domain containing 1A
ILMN_1696939	0.4858	0.0145	2.52173	-3.07367	0.046
ILMN_2055165	0.4858	0.0145	2.5215	-3.07416	0.315	MRFAP1	Morf4 family associated protein 1
ILMN_1743017	0.4858	0.0145	2.52137	-3.07444	0.0553	PRDM16	PR/SET domain 16
ILMN_1672503	0.4858	0.0145	-2.52125	-3.07471	-0.485	DPYSL2	dihydropyrimidinase like 2
ILMN_1810181	0.4858	0.0145	2.52088	-3.07548	0.121	PCGF6	polycomb group ring finger 6
ILMN_1688335	0.4858	0.0145	2.52033	-3.07665	0.165	MAGEB2	MAGE family member B2
ILMN_1674983	0.4858	0.0145	-2.52019	-3.07696	-0.423
ILMN_1653861	0.4858	0.0145	-2.52016	-3.07703	-0.32	SCMH1	sex comb on midleg homolog 1 (Drosophila)
ILMN_1793859	0.4858	0.0145	-2.5201	-3.07714	-0.547	ALDH2	aldehyde dehydrogenase 2 family (mitochondrial)
ILMN_1850546	0.4858	0.0145	2.5201	-3.07714	0.044
ILMN_1753342	0.4858	0.0145	-2.52003	-3.0773	-0.407	SAT1	spermidine/spermine N1-acetyltransferase 1
ILMN_1861089	0.4858	0.0146	-2.51983	-3.07771	-0.0475
ILMN_1689655	0.4858	0.0146	-2.51934	-3.07876	-0.619	HLA-DRA	major histocompatibility complex, class II, DR alpha
ILMN_1791827	0.4858	0.0146	2.51922	-3.07901	0.278
ILMN_1774997	0.4858	0.0146	2.51918	-3.0791	0.1	BCL2L11	BCL2 like 11
ILMN_2229922	0.4858	0.0146	-2.51918	-3.0791	-0.301	KIAA1551	KIAA1551
ILMN_1784364	0.4858	0.0146	-2.51916	-3.07915	-0.241	STARD5	StAR related lipid transfer domain containing 5
ILMN_1789224	0.4858	0.0146	-2.51902	-3.07945	-0.0755
ILMN_1654396	0.4858	0.0146	-2.51859	-3.08036	-0.67	ITGB2	integrin subunit beta 2
ILMN_1862896	0.4858	0.0146	-2.51838	-3.08081	-0.0601
ILMN_1743199	0.4858	0.0146	-2.51823	-3.08111	-0.35	EGR2	early growth response 2
ILMN_1845524	0.4858	0.0146	-2.51759	-3.08248	-0.0424
ILMN_1671603	0.4858	0.0146	2.51751	-3.08264	0.404	MED30	mediator complex subunit 30
ILMN_1870093	0.4858	0.0146	-2.51728	-3.08313	-0.0515
ILMN_1807719	0.4858	0.0147	-2.51715	-3.0834	-0.294	CTNS	cystinosin, lysosomal cystine transporter
ILMN_1727073	0.4858	0.0147	2.51685	-3.08405	0.249	MEA1	male-enhanced antigen 1
ILMN_1709085	0.4858	0.0147	2.51685	-3.08405	0.0854	GSG2	germ cell associated 2, haspin
ILMN_2394438	0.4858	0.0147	-2.51675	-3.08426	-0.215	FAM177A1	family with sequence similarity 177 member A1
ILMN_1660544	0.4858	0.0147	-2.51563	-3.08663	-0.178	ARRDC4	arrestin domain containing 4
ILMN_1899963	0.4858	0.0147	-2.51551	-3.08689	-0.0561
ILMN_1691526	0.4858	0.0147	2.51541	-3.0871	0.169	MAPKAP1	mitogen-activated protein kinase associated protein 1
ILMN_1779252	0.4858	0.0147	-2.51527	-3.08739	-0.431	TRIM22	tripartite motif containing 22
ILMN_2197128	0.4858	0.0147	-2.51502	-3.08793	-0.465	OSR1	odd-skipped related transciption factor 1
ILMN_1761946	0.4858	0.0147	-2.51498	-3.08801	-0.669	PROM2	prominin 2
ILMN_1895883	0.4858	0.0147	2.51495	-3.08809	0.0666
ILMN_2178244	0.4858	0.0147	2.5149	-3.08819	0.177	NAA40	N(alpha)-acetyltransferase 40, NatD catalytic subunit
ILMN_2249552	0.4858	0.0148	2.51435	-3.08935	0.045	GTF2A1	general transcription factor IIA subunit 1
ILMN_2315964	0.4858	0.0148	2.51426	-3.08954	0.118	PSRC1	proline and serine rich coiled-coil 1
ILMN_1862792	0.4858	0.0148	-2.51397	-3.09016	-0.0567
ILMN_1726230	0.4858	0.0148	-2.5138	-3.09052	-0.205	CD1B	CD1b molecule
ILMN_1802355	0.4858	0.0148	2.51368	-3.09078	0.273	RBM18	RNA binding motif protein 18
ILMN_1762464	0.486	0.0148	2.51304	-3.09212	0.0591	MBL2	mannose binding lectin 2
ILMN_1815130	0.486	0.0148	2.51277	-3.09269	0.252	MICALL1	MICAL like 1
ILMN_1761283	0.486	0.0148	-2.51268	-3.09289	-0.0546
ILMN_1729713	0.4863	0.0149	2.51177	-3.09482	0.0423	RAB23	RAB23, member RAS oncogene family
ILMN_2176450	0.4863	0.0149	-2.51161	-3.09515	-0.0471	CA3	carbonic anhydrase 3
ILMN_2137003	0.4863	0.0149	2.51134	-3.09573	0.0513	C16orf78	chromosome 16 open reading frame 78
ILMN_1666482	0.4863	0.0149	2.51119	-3.09605	0.174	SP2	Sp2 transcription factor
ILMN_1776038	0.4863	0.0149	2.51097	-3.09652	0.242	UBXN2A	UBX domain protein 2A
ILMN_2071809	0.4863	0.0149	-2.51068	-3.09712	-0.569	MGP	matrix Gla protein
ILMN_1861534	0.4863	0.0149	2.51064	-3.0972	0.0509
ILMN_1770800	0.4863	0.0149	-2.51038	-3.09776	-0.586	PODN	podocan
ILMN_1900475	0.4882	0.015	2.50846	-3.10183	0.0455
ILMN_2157441	0.4882	0.015	-2.50833	-3.1021	-0.542	HLA-DRA	major histocompatibility complex, class II, DR alpha
ILMN_2180371	0.4883	0.015	2.50796	-3.10289	0.168	FAM216A	family with sequence similarity 216 member A
ILMN_1810423	0.4883	0.015	2.50767	-3.1035	0.386	RPP40	ribonuclease P/MRP subunit p40
ILMN_1709809	0.4891	0.0151	2.50654	-3.1059	0.509	SNU13	SNU13 homolog, small nuclear ribonucleoprotein (U4/U6.U5)
ILMN_2115125	0.4891	0.0151	-2.50607	-3.10688	-0.528	CTGF	connective tissue growth factor
ILMN_1750563	0.4891	0.0151	2.50585	-3.10736	0.48	CERCAM	cerebral endothelial cell adhesion molecule
ILMN_2392818	0.4891	0.0151	2.50573	-3.10759	0.111	RTKN	rhotekin
ILMN_1872404	0.4891	0.0151	-2.50572	-3.10763	-0.213	CCDC50	coiled-coil domain containing 50
ILMN_1669377	0.4907	0.0151	-2.50417	-3.11091	-0.364	AP4B1	adaptor related protein complex 4 beta 1 subunit
ILMN_1695311	0.491	0.0152	-2.50331	-3.11272	-0.631	HLA-DMA	major histocompatibility complex, class II, DM alpha
ILMN_1780968	0.491	0.0152	2.50325	-3.11284	0.0537
ILMN_1676580	0.491	0.0152	2.50315	-3.11306	0.0583	HIST1H4D	histone cluster 1, H4d
ILMN_1808041	0.4913	0.0152	2.5027	-3.11402	0.645	RPL10A	ribosomal protein L10a
ILMN_1686498	0.4918	0.0152	2.50202	-3.11545	0.0482
ILMN_1659058	0.4924	0.0153	2.50127	-3.11704	0.313	PPP1R10	protein phosphatase 1 regulatory subunit 10
ILMN_1763612	0.4933	0.0153	-2.50029	-3.11909	-0.268	TMEM132D	transmembrane protein 132D
ILMN_1786273	0.4935	0.0153	2.4999	-3.11993	0.249	C1orf122	chromosome 1 open reading frame 122
ILMN_1769385	0.4935	0.0153	2.49893	-3.12197	0.0602	LHX9	LIM homeobox 9
ILMN_1696190	0.4935	0.0154	2.49882	-3.12221	0.27	STRN4	striatin 4
ILMN_2264597	0.4935	0.0154	-2.49857	-3.12273	-0.0551	MID2	midline 2
ILMN_1763852	0.4935	0.0154	-2.49851	-3.12286	-0.378	ACACB	acetyl-CoA carboxylase beta
ILMN_1849950	0.4935	0.0154	2.49843	-3.12301	0.0661
ILMN_1735762	0.4935	0.0154	-2.4983	-3.1233	-0.341	NPNT	nephronectin
ILMN_1659085	0.4939	0.0154	-2.49772	-3.12453	-0.0522	WFDC12	WAP four-disulfide core domain 12
ILMN_2278729	0.4948	0.0154	2.49678	-3.12651	0.341	EIF3B	eukaryotic translation initiation factor 3 subunit B
ILMN_1676822	0.4951	0.0154	-2.49629	-3.12754	-0.354	C2orf40	chromosome 2 open reading frame 40
ILMN_1657475	0.4953	0.0155	-2.49577	-3.12864	-0.329	GALT	galactose-1-phosphate uridylyltransferase
ILMN_2229940	0.4953	0.0155	2.49531	-3.12961	0.273	PRADC1	protease associated domain containing 1
ILMN_1776818	0.4953	0.0155	2.49484	-3.13059	0.0468
ILMN_1891922	0.4953	0.0155	-2.49472	-3.13085	-0.0604
ILMN_1723895	0.4953	0.0155	2.49463	-3.13104	0.294	GTF3C5	general transcription factor IIIC subunit 5
ILMN_1660985	0.4953	0.0155	-2.49453	-3.13125	-0.0442
ILMN_2365023	0.4957	0.0155	-2.49393	-3.13252	-0.71	C9orf24	chromosome 9 open reading frame 24
ILMN_2192281	0.4964	0.0156	-2.49316	-3.13413	-0.246	CARD8	caspase recruitment domain family member 8
ILMN_1866118	0.4964	0.0156	2.4929	-3.13468	0.0504
ILMN_1755199	0.4967	0.0156	-2.49135	-3.13795	-0.0435
ILMN_2393712	0.4967	0.0156	-2.49122	-3.13822	-0.463	CTTN	cortactin
ILMN_1874954	0.4967	0.0157	2.4911	-3.13846	0.0387
ILMN_1778136	0.4967	0.0157	-2.49099	-3.13871	-0.346	ZMYND15	zinc finger MYND-type containing 15
ILMN_1698832	0.4967	0.0157	-2.49044	-3.13985	-0.054
ILMN_1905356	0.4967	0.0157	2.49042	-3.13991	0.342
ILMN_1678966	0.4967	0.0157	2.49033	-3.14009	0.469	SNRPF	small nuclear ribonucleoprotein polypeptide F
ILMN_1806123	0.4967	0.0157	2.48984	-3.14112	0.341	MRPL23	mitochondrial ribosomal protein L23
ILMN_1874735	0.4967	0.0157	2.48959	-3.14164	0.0813
ILMN_2372922	0.4967	0.0157	2.48911	-3.14266	0.123	PTPA	protein phosphatase 2 phosphatase activator
ILMN_1908356	0.4967	0.0157	-2.48893	-3.14304	-0.0405
ILMN_1845304	0.4967	0.0158	2.48866	-3.1436	0.0458	LINC01335	long intergenic non-protein coding RNA 1335
ILMN_1761176	0.4967	0.0158	-2.48854	-3.14385	-0.455	GRIPAP1	GRIP1 associated protein 1
ILMN_1878511	0.4967	0.0158	-2.48828	-3.14441	-0.0447
ILMN_1891944	0.4967	0.0158	-2.48826	-3.14445	-0.0657
ILMN_1669479	0.4967	0.0158	2.48784	-3.14534	0.167	MEST	mesoderm specific transcript
ILMN_1862353	0.4967	0.0158	2.48752	-3.146	0.0383
ILMN_1794597	0.4967	0.0158	-2.48747	-3.1461	-0.0798	ZKSCAN7	zinc finger with KRAB and SCAN domains 7
ILMN_2337928	0.4967	0.0158	-2.48728	-3.14652	-0.262	CXCR5	C-X-C motif chemokine receptor 5
ILMN_1797046	0.4967	0.0158	2.48707	-3.14695	0.191	MTHFSD	methenyltetrahydrofolate synthetase domain containing
ILMN_1731503	0.4967	0.0158	-2.48695	-3.14721	-0.734	MARCO	macrophage receptor with collagenous structure
ILMN_1700563	0.4967	0.0158	-2.48693	-3.14725	-0.0983	ZNF552	zinc finger protein 552
ILMN_1886899	0.4967	0.0158	-2.48633	-3.14851	-0.0552
ILMN_1862564	0.4967	0.0159	-2.48602	-3.14915	-0.0424
ILMN_1689704	0.4967	0.0159	2.48598	-3.14924	0.433	TMEM5	transmembrane protein 5
ILMN_1792597	0.4967	0.0159	-2.48575	-3.14973	-0.211	CRYGS	crystallin gamma S
ILMN_1668068	0.4967	0.0159	-2.48557	-3.1501	-0.0546
ILMN_1708132	0.4967	0.0159	2.48511	-3.15106	0.0624	NUP50	nucleoporin 50
ILMN_1743288	0.4967	0.0159	2.48501	-3.15127	0.0784
ILMN_2352023	0.4967	0.0159	-2.48497	-3.15136	-0.529	DSTYK	dual serine/threonine and tyrosine protein kinase
ILMN_1754332	0.4968	0.0159	2.48464	-3.15206	0.247	SNORD14C	small nucleolar RNA, C/D box 14C
ILMN_1909247	0.4975	0.016	2.48351	-3.15444	0.156
ILMN_1665760	0.4975	0.016	-2.48344	-3.15457	-0.0318	C10orf53	chromosome 10 open reading frame 53
ILMN_1778599	0.4975	0.016	-2.48332	-3.15484	-0.312	SP140	SP140 nuclear body protein
ILMN_1759075	0.4983	0.016	-2.48242	-3.15671	-0.334	TNFRSF13B	TNF receptor superfamily member 13B
ILMN_1757837	0.4989	0.016	-2.48176	-3.1581	-0.171	CFAP206	cilia and flagella associated protein 206
ILMN_1757497	0.4989	0.016	2.4815	-3.15866	0.432	VGF	VGF nerve growth factor inducible
ILMN_1691299	0.4993	0.0161	-2.48093	-3.15985	-0.197	CFAP126	cilia and flagella associated protein 126
ILMN_2169152	0.5009	0.0161	-2.47936	-3.16314	-0.549	SRGN	serglycin
ILMN_1790549	0.5012	0.0161	-2.47893	-3.16405	-0.407	TSPAN3	tetraspanin 3
ILMN_1711712	0.5016	0.0162	-2.47837	-3.16522	-0.085	GAS2L2	growth arrest specific 2 like 2
ILMN_1855459	0.5026	0.0162	2.47713	-3.16782	0.0435
ILMN_1676277	0.5026	0.0162	2.47704	-3.168	0.106
ILMN_1722483	0.5034	0.0163	2.476	-3.17018	0.0791
ILMN_2217601	0.5034	0.0163	-2.47589	-3.17042	-0.199	ANXA9	annexin A9
ILMN_1784706	0.5036	0.0163	-2.47544	-3.17135	-0.455
ILMN_1682636	0.5036	0.0163	-2.47528	-3.1717	-0.489	CXCL2	C-X-C motif chemokine ligand 2
ILMN_1671276	0.5042	0.0163	-2.47432	-3.1737	-0.0434
ILMN_1900358	0.5042	0.0163	-2.47417	-3.17402	-0.0416
ILMN_2409298	0.5042	0.0163	2.4739	-3.17459	0.302	NUSAP1	nucleolar and spindle associated protein 1
ILMN_1910754	0.5042	0.0164	2.47358	-3.17524	0.0476
ILMN_1834318	0.5042	0.0164	-2.4734	-3.17563	-0.0568
ILMN_1766401	0.5042	0.0164	2.47328	-3.17589	0.0449	OR1M1	olfactory receptor family 1 subfamily M member 1
ILMN_1845666	0.5044	0.0164	2.47167	-3.17926	0.045
ILMN_1675191	0.5044	0.0164	-2.47159	-3.17941	-0.141	GAPT	GRB2-binding adaptor protein, transmembrane
ILMN_1762899	0.5044	0.0164	-2.47147	-3.17966	-0.56	EGR1	early growth response 1
ILMN_2383484	0.5044	0.0165	2.47101	-3.18064	0.34	C19orf48	chromosome 19 open reading frame 48
ILMN_1671437	0.5044	0.0165	-2.47095	-3.18075	-0.116	MAP3K15	mitogen-activated protein kinase kinase kinase 15
ILMN_1811410	0.5044	0.0165	2.47091	-3.18084	0.0397	RHAG	Rh-associated glycoprotein
ILMN_1814985	0.5044	0.0165	2.47053	-3.18163	0.154	PDLIM7	PDZ and LIM domain 7
ILMN_1785804	0.5044	0.0165	2.4703	-3.18211	0.109	ERVW-1	endogenous retrovirus group W member 1
ILMN_1717781	0.5044	0.0165	-2.47004	-3.18266	-0.178	VPS11	VPS11, CORVET/HOPS core subunit
ILMN_1793220	0.5044	0.0165	2.46941	-3.18398	0.27	GART	phosphoribosylglycinamide formyltransferase, phosphoribosylglycinamide synthetase, phosphoribosylaminoimidazole synthetase
ILMN_1805828	0.5044	0.0165	2.46931	-3.18419	0.262	VRK1	vaccinia related kinase 1
ILMN_1743208	0.5044	0.0166	2.46906	-3.18472	0.174	NEDD1	neural precursor cell expressed, developmentally down-regulated 1
ILMN_1727017	0.5044	0.0166	-2.46905	-3.18473	-0.475	SFTPB	surfactant protein B
ILMN_1728883	0.5044	0.0166	-2.46882	-3.18521	-0.0498
ILMN_1829914	0.5044	0.0166	2.46789	-3.18714	0.0533
ILMN_1733869	0.5044	0.0166	2.46787	-3.18719	0.419	OGDH	oxoglutarate dehydrogenase
ILMN_1750402	0.5044	0.0166	2.46787	-3.1872	0.0422	SNORD107	small nucleolar RNA, C/D box 107
ILMN_1682953	0.5044	0.0166	2.46773	-3.18749	0.409
ILMN_1681324	0.5044	0.0166	2.46767	-3.18762	0.22	MRPL49	mitochondrial ribosomal protein L49
ILMN_1782730	0.5044	0.0166	2.46762	-3.18772	0.161	ZNF473	zinc finger protein 473
ILMN_1671693	0.5044	0.0166	2.46754	-3.18789	0.387	TPGS2	tubulin polyglutamylase complex subunit 2
ILMN_2105441	0.5044	0.0166	-2.46716	-3.18868	-0.94	JCHAIN	joining chain of multimeric IgA and IgM
ILMN_2289849	0.5044	0.0166	-2.46699	-3.18903	-0.481	FCGR2A	Fc fragment of IgG receptor IIa
ILMN_2226763	0.5044	0.0166	-2.46673	-3.18957	-0.0659	H2AFB2	H2A histone family member B2
ILMN_1738347	0.5044	0.0167	-2.46551	-3.19212	-0.467	RNPEP	arginyl aminopeptidase
ILMN_1752312	0.5044	0.0167	2.46528	-3.1926	0.0312
ILMN_1812364	0.5044	0.0167	2.4651	-3.19299	0.0422
ILMN_1716441	0.5044	0.0167	2.46505	-3.19309	0.234	SNORD4A	small nucleolar RNA, C/D box 4A
ILMN_1734559	0.5044	0.0167	2.46463	-3.19396	0.124	SORD	sorbitol dehydrogenase
ILMN_1861160	0.5044	0.0168	2.46407	-3.19513	0.0475
ILMN_1725234	0.5044	0.0168	-2.46363	-3.19604	-0.0533	CYP19A1	cytochrome P450 family 19 subfamily A member 1
ILMN_1652952	0.5044	0.0168	2.46347	-3.19639	0.101	RASAL2	RAS protein activator like 2
ILMN_1691295	0.5044	0.0168	-2.46339	-3.19655	-0.054	NECTIN1	nectin cell adhesion molecule 1
ILMN_2399190	0.5044	0.0168	-2.46335	-3.19664	-0.0932	TNFSF13	tumor necrosis factor superfamily member 13
ILMN_2396903	0.5044	0.0168	-2.46334	-3.19666	-0.16	KCNJ15	potassium voltage-gated channel subfamily J member 15
ILMN_1740772	0.5044	0.0168	-2.46305	-3.19727	-0.415	APBB3	amyloid beta precursor protein binding family B member 3
ILMN_1815679	0.5044	0.0168	-2.46304	-3.19727	-0.19	COL6A6	collagen type VI alpha 6 chain
ILMN_1774336	0.5044	0.0168	2.46221	-3.19902	0.329	POLE2	DNA polymerase epsilon 2, accessory subunit
ILMN_1733669	0.5044	0.0168	2.46204	-3.19936	0.15	CDH18	cadherin 18
ILMN_1770281	0.5044	0.0169	2.46185	-3.19977	0.0488	ERC1	ELKS/RAB6-interacting/CAST family member 1
ILMN_1727098	0.5044	0.0169	-2.46175	-3.19996	-0.33	PPP1R16B	protein phosphatase 1 regulatory subunit 16B
ILMN_1698369	0.5044	0.0169	2.46095	-3.20163	0.193
ILMN_2120072	0.5044	0.0169	2.4609	-3.20174	0.294	FAM161A	family with sequence similarity 161 member A
ILMN_1866116	0.5044	0.0169	2.46081	-3.20193	0.0554
ILMN_1662587	0.5044	0.0169	-2.4606	-3.20238	-0.609	PNPLA7	patatin like phospholipase domain containing 7
ILMN_1680732	0.5044	0.0169	2.46046	-3.20267	0.0405	B4GALT2	beta-1,4-galactosyltransferase 2
ILMN_1830411	0.5044	0.0169	2.46037	-3.20285	0.0524
ILMN_1708959	0.5044	0.0169	-2.46033	-3.20294	-0.0443	MFN1	mitofusin 1
ILMN_1670317	0.5044	0.0169	2.46019	-3.20322	0.0444
ILMN_1842818	0.5044	0.0169	2.46019	-3.20323	0.0544
ILMN_1733680	0.5044	0.0169	-2.46008	-3.20346	-0.232	AZI2	5-azacytidine induced 2
ILMN_1686416	0.5044	0.0169	-2.46007	-3.20347	-0.0638	GRIP2	glutamate receptor interacting protein 2
ILMN_1755721	0.5044	0.0169	-2.45993	-3.20376	-0.192	ANXA9	annexin A9
ILMN_1673746	0.5044	0.0169	2.45979	-3.20405	0.256
ILMN_1682110	0.5047	0.017	2.45913	-3.20543	0.0648	HOXA10	homeobox A10
ILMN_1797318	0.5047	0.017	2.45887	-3.20597	0.289	HSPA14	heat shock protein family A (Hsp70) member 14
ILMN_1722981	0.5047	0.017	-2.45886	-3.206	-0.412	TLR5	toll like receptor 5
ILMN_2196569	0.5051	0.017	2.45826	-3.20725	0.315	NUP93	nucleoporin 93
ILMN_1724490	0.5051	0.017	2.45803	-3.20773	0.204	PSPC1	paraspeckle component 1
ILMN_1831607	0.5052	0.017	2.45747	-3.20889	0.0498
ILMN_1781001	0.5052	0.0171	-2.45716	-3.20953	-0.471	SOCS3	suppressor of cytokine signaling 3
ILMN_2264011	0.5052	0.0171	-2.45716	-3.20954	-0.3	GRAP	GRB2-related adaptor protein
ILMN_1844971	0.5052	0.0171	2.45697	-3.20993	0.0453
ILMN_1702127	0.5055	0.0171	2.4563	-3.21133	0.0575	SPRR2G	small proline rich protein 2G
ILMN_1679195	0.5055	0.0171	2.45612	-3.21171	0.411
ILMN_1715718	0.5055	0.0171	-2.45603	-3.2119	-0.26	ZNF784	zinc finger protein 784
ILMN_1822552	0.5065	0.0171	2.45503	-3.21396	0.0447
ILMN_1763663	0.5079	0.0172	2.45339	-3.21739	0.26
ILMN_1771039	0.5079	0.0172	2.45333	-3.2175	0.227	GTSE1	G2 and S-phase expressed 1
ILMN_2141807	0.5079	0.0172	2.45317	-3.21784	0.204	KNSTRN	kinetochore localized astrin/SPAG5 binding protein
ILMN_2391355	0.5079	0.0172	2.45279	-3.21862	0.298	STAMBP	STAM binding protein
ILMN_1657972	0.5079	0.0172	2.45272	-3.21878	0.0495	HHIPL1	HHIP like 1
ILMN_1676383	0.5081	0.0173	2.45235	-3.21955	0.0697	ENPP6	ectonucleotide pyrophosphatase/phosphodiesterase 6
ILMN_2333766	0.5083	0.0173	-2.45172	-3.22085	-0.292
ILMN_1752575	0.5083	0.0173	2.45163	-3.22103	0.153
ILMN_1652580	0.5087	0.0173	2.45115	-3.22204	0.264	POLD1	DAN polymerase delta 1, catalytic subunit
ILMN_1658271	0.511	0.0174	2.44906	-3.22638	0.0958	LSS	lanosterol synthase (2,3-oxidosqualene-lanosterol cyclase)
ILMN_2385688	0.511	0.0174	-2.44878	-3.22697	-0.343	RABL2B	RAB, member of RAS oncogene family-like 2B
ILMN_1692032	0.511	0.0174	2.44828	-3.22801	0.0437
ILMN_2252309	0.511	0.0175	-2.44784	-3.22892	-0.529	DPP7	dipeptidyl peptidase 7
ILMN_2097358	0.511	0.0175	2.44763	-3.22936	0.0531
ILMN_1859732	0.511	0.0175	2.44746	-3.2297	0.048
ILMN_1785252	0.511	0.0175	-2.44741	-3.22981	-0.367	SLC26A6	solute carrier family 26 member 6
ILMN_1893053	0.511	0.0175	2.44737	-3.22989	0.0453
ILMN_1821231	0.511	0.0175	-2.44717	-3.23031	-0.0478
ILMN_1751346	0.511	0.0175	-2.44669	-3.23129	-0.435	ERBB3	erb-b2 receptor tyrosine kinase 3
ILMN_1915188	0.511	0.0175	-2.44668	-3.23132	-0.288	MID2	midline 2
ILMN_2046751	0.5111	0.0175	2.44604	-3.23266	0.0488	PGLYRP3	peptidoglycan recognition protein 3
ILMN_1681641	0.5111	0.0175	2.4458	-3.23314	0.133
ILMN_1813998	0.5111	0.0176	2.44557	-3.23363	0.0791	DPPA5	developmental pluripotency associated 5
ILMN_1899018	0.5111	0.0176	-2.44555	-3.23368	-0.0407
ILMN_1657862	0.5111	0.0176	2.44538	-3.23402	0.334	AHCY	adenosylhomocysteinase
ILMN_2195914	0.5112	0.0176	2.44503	-3.23474	0.353	GGH	gamma-glutamyl hydrolase
ILMN_1793563	0.5112	0.0176	2.44468	-3.23548	0.3	DCTN1	dynactin subunit 1
ILMN_2089340	0.5112	0.0176	2.44425	-3.23637	0.23	FAM127B	family with sequence similarity 127 member B
ILMN_1687546	0.5112	0.0176	2.44423	-3.23641	0.167	HSP90AA1	heat shock protein 90 alpha family class A member 1
ILMN_1768558	0.5112	0.0176	2.44411	-3.23665	0.153
ILMN_1742064	0.5116	0.0177	-2.44323	-3.23848	-0.0652
ILMN_1902976	0.5116	0.0177	-2.44314	-3.23867	-0.0491
ILMN_1671051	0.5116	0.0177	2.4431	-3.23874	0.0532	CD276	CD276 molecule
ILMN_1679782	0.5119	0.0177	2.44235	-3.24029	0.0764	BLOC1S2	biogenesis of lysosomal organelles complex 1 subunit 2
ILMN_1755732	0.5119	0.0177	-2.44231	-3.24039	-0.125	ARMC9	armadillo repeat containing 9
ILMN_2168217	0.5119	0.0177	-2.44175	-3.24154	-0.408	GPR183	G protein-coupled receptor 183
ILMN_1874506	0.5119	0.0178	2.44073	-3.24366	0.109	MINCR	MYC-induced long noncoding RNA
ILMN_1697512	0.5119	0.0178	2.44041	-3.24432	0.0434	SLC32A1	solute carrier family 32 member 1
ILMN_2285112	0.5119	0.0178	-2.4402	-3.24475	-0.327	FBXO11	F-box protein 11
ILMN_2327775	0.5119	0.0178	2.44011	-3.24495	0.0715	TRIM23	tripartite motif containing 23
ILMN_2329263	0.5119	0.0178	2.43991	-3.24536	0.0839	NFIC	nuclear factor I C
ILMN_1873244	0.5119	0.0178	2.43984	-3.24551	0.0405
ILMN_1661251	0.5119	0.0178	2.43975	-3.24568	0.0749	SPAM1	sperm adhesion molecule 1
ILMN_1739178	0.5119	0.0178	2.43949	-3.24623	0.0643	TBXA2R	thromboxane A2 receptor
ILMN_1661717	0.5119	0.0178	2.43938	-3.24645	0.33	TFDP1	transcription factor Dp-1
ILMN_1776260	0.5119	0.0178	2.43922	-3.24679	0.486	PPIAL4A	peptidylprolyl isomerase A like 4A
ILMN_1836751	0.5119	0.0178	2.43899	-3.24726	0.129
ILMN_1716057	0.5119	0.0179	-2.4389	-3.24745	-0.36	CAPN2	calpain 2
ILMN_1664212	0.5119	0.0179	-2.43866	-3.24795	-0.0591
ILMN_1663113	0.5119	0.0179	2.43812	-3.24907	0.413	TTLL12	tubulin tyrosine ligase like 12
ILMN_1731193	0.5119	0.0179	2.43779	-3.24974	0.11	BCL2L12	BCL2 like 12
ILMN_2401769	0.5119	0.0179	2.43751	-3.25033	0.281
ILMN_1732150	0.5119	0.0179	2.43739	-3.25058	0.156	KIAA0101	KIAA0101
ILMN_1912745	0.5119	0.0179	2.43718	-3.251	0.0495
ILMN_1796353	0.5119	0.0179	2.43714	-3.25109	0.051
ILMN_1843840	0.5119	0.0179	-2.43713	-3.25111	-0.0435
ILMN_2062468	0.5119	0.0179	-2.437	-3.25137	-0.496	IGFBP7	insulin like growth factor binding protein 7
ILMN_2049900	0.5119	0.0179	2.43698	-3.25141	0.0459	BTBD8	BTB domain containing 8
ILMN_1697433	0.5119	0.018	-2.43659	-3.25223	-0.155	CYP46A1	cytochrome P450 family 46 subfamily A member 1
ILMN_1819608	0.5119	0.018	-2.43613	-3.25319	-0.49	ARRB1	arrestin beta 1
ILMN_2390946	0.5119	0.018	-2.43566	-3.25415	-0.0929	SCARF1	scavenger receptor class F member 1
ILMN_1725233	0.5119	0.018	2.43562	-3.25423	0.0478
ILMN_1717334	0.5119	0.018	-2.43561	-3.25425	-0.288	VAV1	vav guanine nucleotide exchange factor 1
ILMN_1662932	0.5119	0.018	-2.43558	-3.25432	-0.528	LCP1	lymphocyte cytosolic protein 1
ILMN_2211910	0.5119	0.018	2.43537	-3.25475	0.0497
ILMN_1782618	0.5124	0.018	2.43474	-3.25605	0.32	C9orf16	chromosome 9 open reading frame 16
ILMN_1763695	0.5125	0.0181	-2.43428	-3.25701	-0.733	C9orf24	chromosome 9 open reading frame 24
ILMN_1753790	0.5125	0.0181	2.43419	-3.25719	0.243	ZPR1	ZPR1 zinc finger
ILMN_1796216	0.5127	0.0181	-2.43362	-3.25837	-0.32	VASH1	vasohibin 1
ILMN_1846799	0.5127	0.0181	-2.43356	-3.2585	-0.0556
ILMN_1677920	0.5129	0.0181	-2.43318	-3.25927	-0.261	LTF	lactotransferrin
ILMN_1683059	0.5129	0.0181	2.43293	-3.2598	0.266	SIRT5	sirtuin 5
ILMN_2094332	0.5131	0.0182	-2.4319	-3.26192	-0.128
ILMN_1880761	0.5131	0.0182	2.43165	-3.26244	0.0744
ILMN_1758599	0.5131	0.0182	-2.43139	-3.26298	-0.18	FAM163A	family with sequence similarity 163 member A
ILMN_1752406	0.5131	0.0182	2.43061	-3.26459	0.332
ILMN_1657139	0.5131	0.0182	2.43055	-3.2647	0.256	ADAT1	adenosine deaminase, tRNA specific 1
ILMN_1742330	0.5131	0.0182	-2.4305	-3.26482	-0.513	PLXNB1	plexin B1
ILMN_1768816	0.5131	0.0182	2.43027	-3.26529	0.219	TMPO	thymopoietin
ILMN_1771026	0.5131	0.0182	2.43018	-3.26547	0.303	GARS	glycyl-tRNA synthetase
ILMN_1686961	0.5131	0.0182	2.43017	-3.26548	0.093	FGFBP3	fibroblast growth factor binding protein 3
ILMN_1815308	0.5131	0.0182	-2.43013	-3.26558	-0.504	SDC1	syndecan 1
ILMN_1815366	0.5131	0.0182	-2.43012	-3.26559	-0.328
ILMN_2045994	0.5131	0.0183	-2.42988	-3.2661	-0.34	SEPW1	selenoprotein W, 1
ILMN_1732720	0.5131	0.0183	2.42983	-3.26621	0.04	LENG9	leukocyte receptor cluster member 9
ILMN_1777397	0.5138	0.0183	2.4289	-3.26812	0.422	MSX1	msh homeobox 1
ILMN_1683179	0.5138	0.0183	-2.42878	-3.26836	-0.564	RRAD	RRAD, Ras related glycolysis inhibitor and calcium channel regulator
ILMN_1856110	0.5138	0.0183	-2.4285	-3.26894	-0.0524
ILMN_2340599	0.5138	0.0183	2.42835	-3.26925	0.0802	EPHA8	EPH receptor A8
ILMN_1889741	0.5142	0.0184	-2.4274	-3.27121	-0.0485
ILMN_1785709	0.5142	0.0184	2.42711	-3.27181	0.0547
ILMN_1771884	0.5142	0.0184	-2.42702	-3.27199	-0.151	ZNF45	zinc finger protein 45
ILMN_2071473	0.5142	0.0184	2.42686	-3.27232	0.0455	FAM47C	family with sequence similarity 47 member C
ILMN_1795672	0.5142	0.0184	2.42597	-3.27415	0.0448
ILMN_1887486	0.5142	0.0185	-2.42563	-3.27486	-0.0388
ILMN_1664014	0.5142	0.0185	2.42563	-3.27486	0.205	STOX1	storkhead box 1
ILMN_1747217	0.5142	0.0185	2.42493	-3.27631	0.177	C15orf41	chromosome 15 open reading frame 41
ILMN_1886566	0.5142	0.0185	2.42485	-3.27647	0.0434
ILMN_2374692	0.5142	0.0185	2.42478	-3.27661	0.285	WAC	WW domain containing adaptor with coiled-coil
ILMN_1852384	0.5142	0.0185	2.42416	-3.27789	0.295	ERC1	ELKS/RAB6-interacting/CAST family member 1
ILMN_1733675	0.5142	0.0185	-2.42375	-3.27873	-0.362	MPP1	membrane palmitoylated protein 1
ILMN_1788254	0.5142	0.0186	2.42331	-3.27965	0.326	PGAM5	PGAM family member 5, mitochondrial serine/threonine protein phosphatase
ILMN_1742167	0.5142	0.0186	2.42318	-3.27991	0.454	TUBA1C	tubulin alpha 1c
ILMN_1740409	0.5142	0.0186	2.42296	-3.28036	0.0583	OR8G5	olfactory receptor family 8 subfamily G member 5
ILMN_1775734	0.5142	0.0186	-2.42286	-3.28056	-0.319	SH2D3C	SH2 domain containing 3C
ILMN_2371280	0.5142	0.0186	-2.42272	-3.28085	-0.762	CSF3R	colony stimulating factor 3 receptor
ILMN_1656011	0.5142	0.0186	-2.42261	-3.28108	-0.656	RGS1	regulator of G-protein signaling 1
ILMN_2403852	0.5142	0.0186	-2.42155	-3.28325	-0.222	CYTH1	cytohesin 1
ILMN_1915154	0.5142	0.0187	2.42109	-3.28421	0.0451
ILMN_1734472	0.5142	0.0187	-2.42004	-3.28637	-0.516	PEBP4	phosphatidylethanolamine binding protein 4
ILMN_1776490	0.5142	0.0187	2.42002	-3.2864	0.445	C17orf53	chromosome 17 open reading frame 53
ILMN_1741054	0.5142	0.0187	2.41988	-3.2867	0.228	SLC5A6	solute carrier family 5 member 6
ILMN_1705774	0.5142	0.0187	2.41988	-3.2867	0.366	TIGD5	tigger transposable element derived 5
ILMN_1727618	0.5142	0.0187	2.41956	-3.28735	0.338	NDUFAF6	NADH:ubiquinone oxidoreductase complex assembly factor 6
ILMN_1701269	0.5142	0.0187	2.4193	-3.2879	0.42	ATP5C1	ATP synthase, H+ transporting, mitochondrial F1 complex, gamma polypeptide 1
ILMN_1655788	0.5142	0.0187	-2.41925	-3.28798	-0.0427	ZNF780A	zinc finger protein 780A
ILMN_2290628	0.5142	0.0187	-2.41922	-3.28806	-0.103	IL16	interleukin 16
ILMN_2135756	0.5142	0.0188	2.41909	-3.28831	0.141	HSF2BP	heat shock transcription factor 2 binding protein
ILMN_2380850	0.5142	0.0188	2.41836	-3.28983	0.257	SDCCAG3	serologically defined colon cancer antigen 3
ILMN_1734568	0.5142	0.0188	2.41814	-3.29028	0.0459	PC	pyruvate carboxylase
ILMN_1799600	0.5142	0.0188	-2.41793	-3.29072	-0.287	STARD8	StAR related lipid transfer domain containing 8
ILMN_1881011	0.5142	0.0188	2.41792	-3.29073	0.0454
ILMN_1835080	0.5142	0.0188	2.41755	-3.29148	0.0456
ILMN_1763704	0.5142	0.0188	-2.41744	-3.29171	-0.456	RGS11	regulator of G-protein signaling 11
ILMN_1845088	0.5142	0.0188	2.41709	-3.29244	0.0593
ILMN_1775171	0.5142	0.0188	-2.41707	-3.29247	-0.0926	WIPF2	WAS/WASL interacting protein family member 2
ILMN_1684802	0.5142	0.0189	2.41695	-3.29272	0.198	TAF5	TATA-box binding protein associated factor 5
ILMN_2182750	0.5142	0.0189	2.4166	-3.29345	0.284	DDX1	DEAD/H-box helicase 1
ILMN_1839896	0.5142	0.0189	-2.41617	-3.29434	-0.0508
ILMN_2359835	0.5142	0.0189	-2.41598	-3.29471	-1.21	SFTPB	surfactant protein B
ILMN_1857897	0.5142	0.0189	-2.41596	-3.29476	-0.242
ILMN_1658569	0.5142	0.0189	2.41581	-3.29507	0.595	LGALS7B	galectin 7B
ILMN_1684412	0.5142	0.0189	2.41572	-3.29524	0.0362
ILMN_1754839	0.5142	0.0189	2.41566	-3.29537	0.242	DHX15	DEAH-box helicase 15
ILMN_2331082	0.5142	0.0189	-2.41512	-3.29648	-0.403	MS4A7	membrane spanning 4-domains A7
ILMN_1783497	0.5142	0.0189	2.41504	-3.29664	0.139	PANK1	pantothenate kinase 1
ILMN_1778316	0.5142	0.0189	2.41499	-3.29675	0.0744	NOM1	nucleolar protein with MIF4G domain 1
ILMN_1780397	0.5142	0.019	-2.41485	-3.29704	-0.245	TRAF3IP3	TRAF3 interacting protein 3
ILMN_2195390	0.5142	0.019	2.41464	-3.29746	0.052	SUMO1P1	SUMO1 pseudogene 1
ILMN_1721978	0.5142	0.019	-2.41451	-3.29773	-0.413	CARD11	caspase recruitment domain family member 11
ILMN_1749212	0.5142	0.019	2.41442	-3.29792	0.164	TMEM189-UBE2V1	TMEM189-UBE2V1 readthrough
ILMN_1698578	0.5142	0.019	-2.41427	-3.29822	-0.0484
ILMN_1676728	0.5142	0.019	2.41399	-3.2988	0.436	DLK2	delta like non-canonical Notch ligand 2
ILMN_1721895	0.5142	0.019	2.41392	-3.29895	0.0551
ILMN_1671378	0.5142	0.019	-2.4139	-3.29899	-0.0855
ILMN_2361163	0.5142	0.019	2.41355	-3.29971	0.441	SSBP3	single stranded DNA binding protein 3
ILMN_1818538	0.5142	0.019	2.4133	-3.30021	0.0518
ILMN_1784595	0.5142	0.019	-2.41327	-3.30028	-0.0605	SBF2	SET binding factor 2
ILMN_1750409	0.5142	0.0191	-2.41272	-3.30141	-0.371	RAB9A	RAB9A, member RAS oncogene family
ILMN_1669842	0.5142	0.0191	2.4127	-3.30145	0.153	CHAF1A	chromatin assembly factor 1 subunit A
ILMN_1781345	0.5142	0.0191	2.4125	-3.30185	0.0479
ILMN_1888658	0.5142	0.0191	-2.41221	-3.30245	-0.073
ILMN_1853778	0.5142	0.0191	-2.4121	-3.30268	-0.0561
ILMN_1770130	0.5142	0.0191	2.41201	-3.30287	0.0497	C10orf113	chromosome 10 open reading frame 113
ILMN_1798177	0.5142	0.0191	2.412	-3.30289	0.523	CHURC1	churchill domain containing 1
ILMN_2393243	0.5142	0.0191	2.41194	-3.30302	0.22	GTPBP8	GTP binding protein 8 (putative)
ILMN_1796430	0.5142	0.0191	2.41178	-3.30334	0.281	PSMD3	proteasome 26S subunit, non-ATPase 3
ILMN_1728626	0.5142	0.0191	2.41169	-3.30353	0.286	WDR5	WD repeat domain 5
ILMN_1652549	0.5142	0.0191	2.4112	-3.30454	0.168	DTNA	dystrobrevin alpha
ILMN_1800638	0.5142	0.0191	-2.41105	-3.30484	-0.218	CELF2	CUGBP, Elav-like family member 2
ILMN_1917147	0.5142	0.0191	-2.41078	-3.30539	-0.0716
ILMN_2352090	0.5142	0.0191	-2.41072	-3.30551	-0.465	GPRC5C	G protein-coupled receptor class C group 5 member C
ILMN_1738677	0.5142	0.0192	-2.41065	-3.30566	-0.339	PRPF8	pre-mRNA processing factor 8
ILMN_1752914	0.5142	0.0192	-2.41054	-3.30589	-0.196	ARHGAP31	Rho GTPase activating protein 31
ILMN_2389013	0.5142	0.0192	2.41043	-3.30611	0.265	ADRM1	adhesion regulating molecule 1
ILMN_1773493	0.5142	0.0192	2.40941	-3.30819	0.294	TIMM23	translocase of inner mitochondrial membrane 23
ILMN_1665311	0.5142	0.0192	2.40933	-3.30836	0.0878	STH	saitohin
ILMN_1688959	0.5142	0.0192	-2.40909	-3.30885	-0.481	CD27	CD27 molecule
ILMN_1797735	0.5142	0.0192	-2.40906	-3.30891	-0.335	C1orf21	chromosome 1 open reading frame 21
ILMN_1734196	0.5142	0.0192	2.40892	-3.30921	0.0453
ILMN_1911240	0.5142	0.0193	-2.40862	-3.30983	-0.0423
ILMN_1727511	0.5142	0.0193	2.40852	-3.31002	0.0489
ILMN_2372011	0.5142	0.0193	2.40797	-3.31116	0.311	SCAND1	SCAN domain containing 1
ILMN_2326675	0.5142	0.0193	2.40794	-3.31121	0.184	NR2C1	nuclear receptor subfamily 2 group C member 1
ILMN_1800654	0.5142	0.0193	2.40784	-3.31142	0.0519	MCM7	minichromosome maintenance complex component 7
ILMN_1762808	0.5142	0.0193	2.40781	-3.31149	0.0867
ILMN_1846075	0.5142	0.0193	-2.40762	-3.31186	-0.0445
ILMN_1790534	0.5142	0.0193	-2.40753	-3.31205	-0.305
ILMN_1739236	0.5142	0.0193	2.40753	-3.31206	0.234	ZNF668	zinc finger protein 668
ILMN_2097790	0.5142	0.0193	2.40752	-3.31208	0.318	FAAP20	Fanconi anemia core complex associated protein 20
ILMN_1768107	0.5142	0.0193	-2.4069	-3.31334	-0.0389
ILMN_1782241	0.5142	0.0193	2.4068	-3.31356	0.0871
ILMN_2190214	0.5142	0.0193	-2.40678	-3.31359	-0.0798	CHIC1	cysteine rich hydrophobic domain 1
ILMN_1690066	0.5142	0.0194	2.40618	-3.31481	0.248	TIGD2	tigger transposable element derived 2
ILMN_1694273	0.5142	0.0194	2.40596	-3.31528	0.0543	HRH3	histamine receptor H3
ILMN_1655642	0.5142	0.0194	2.40556	-3.31608	0.251	FANCI	Fanconi anemia complementation group I
ILMN_1689153	0.5142	0.0194	-2.40544	-3.31633	-0.0533
ILMN_2242921	0.5142	0.0194	-2.40528	-3.31666	-0.0663	IKZF2	IKAROS family zinc finger 2
ILMN_1812915	0.5142	0.0195	-2.40415	-3.31897	-0.139	TNFRSF10B	TNF receptor superfamily member 10b
ILMN_1797875	0.5142	0.0195	-2.40412	-3.31903	-0.673	ALOX5AP	arachidonate 5-lipoxygenase activating protein
ILMN_1741997	0.5142	0.0195	2.40405	-3.31917	0.231	SNRPC	small nuclear ribonucleoprotein polypeptide C
ILMN_1685722	0.5142	0.0195	-2.40403	-3.31923	-0.32	EIF4A2	eukaryotic translation initiation factor 4A2
ILMN_1768553	0.5142	0.0195	-2.40402	-3.31924	-0.148
ILMN_1665909	0.5142	0.0195	-2.40393	-3.31941	-0.317	LASP1	LIM and SH3 protein 1
ILMN_1800573	0.5142	0.0195	2.40377	-3.31975	0.438	RPS21	ribosomal protein S21
ILMN_2241627	0.5142	0.0195	2.40303	-3.32127	0.303	MAGEC1	MAGE family member C1
ILMN_1735292	0.5142	0.0195	-2.40291	-3.32152	-0.074	ENKUR	enkurin, TRPC channel interacting protein
ILMN_1733579	0.5142	0.0195	-2.40273	-3.32188	-0.237	EVI2A	ecotropic viral integration site 2A
ILMN_2348487	0.5142	0.0195	-2.40238	-3.3226	-0.0639	ADGRE3	adhesion G protein-coupled receptor E3
ILMN_1903692	0.5142	0.0196	2.40208	-3.32321	0.0496
ILMN_1783690	0.5142	0.0196	-2.40203	-3.3233	-0.613	CAPN8	calpain 8
ILMN_1787347	0.5142	0.0196	-2.40203	-3.32331	-0.0467
ILMN_1683370	0.5142	0.0196	-2.40187	-3.32363	-0.0529	C16orf71	chromosome 16 open reading frame 71
ILMN_2269673	0.5142	0.0196	-2.40142	-3.32455	-0.0423	CDY1	chromodomain Y-linked 1
ILMN_2346316	0.5142	0.0196	2.40134	-3.32471	0.126
ILMN_1742052	0.5142	0.0196	-2.40109	-3.32524	-0.0933	SERPINB9	serpin family B member 9
ILMN_1658356	0.5142	0.0196	-2.40107	-3.32527	-0.451	PAMR1	peptidase domain containing associated with muscle regeneration 1
ILMN_1817786	0.5142	0.0196	-2.40106	-3.3253	-0.049
ILMN_1673553	0.5142	0.0196	2.40089	-3.32565	0.174	PTH2	parathyroid hormone 2
ILMN_1662741	0.5142	0.0196	-2.40078	-3.32586	-0.313	LPAR2	lysophosphatidic acid receptor 2
ILMN_2414399	0.5142	0.0196	2.40076	-3.3259	0.311	NME1	NME/NM23 nucleoside diphosphate kinase 1
ILMN_1882271	0.5142	0.0196	-2.40039	-3.32666	-0.0436
ILMN_1727646	0.5142	0.0197	2.40029	-3.32687	0.0486
ILMN_1792419	0.515	0.0197	2.39944	-3.32861	0.0427	FRMD7	FERM domain containing 7
ILMN_1862070	0.5152	0.0197	2.39906	-3.32937	0.051
ILMN_1899696	0.5153	0.0197	2.39877	-3.32998	0.078
ILMN_1894072	0.5155	0.0197	-2.39843	-3.33068	-0.311	PIK3CG	phosphatidylinositol-4,5-bisphosphate 3-kinase catalytic subunit gamma
ILMN_1690963	0.5161	0.0198	2.39746	-3.33265	0.398	ASAP1	ArfGAP with SH3 domain, ankyrin repeat and PH domain 1
ILMN_1803889	0.5161	0.0198	-2.39726	-3.33306	-0.424	BICDL2	BICD family like cargo adaptor 2
ILMN_1670305	0.5161	0.0198	-2.39716	-3.33327	-0.413	SERPING1	serpin family G member 1
ILMN_1657010	0.5161	0.0198	2.39707	-3.33344	0.0399
ILMN_2218780	0.5165	0.0198	2.39637	-3.33487	0.206	PDP1	pyruvate dehyrogenase phosphatase catalytic subunit 1
ILMN_1659856	0.5165	0.0199	-2.39592	-3.33579	-0.083	FAM167B	family with sequence similarity 167 member B
ILMN_1706539	0.5165	0.0199	-2.3959	-3.33583	-0.258	KDM3B	lysine demethylase 3B
ILMN_1672149	0.5165	0.0199	2.3959	-3.33584	0.209	CHCHD1	coiled-coil-helix-coiled-coil-helix domain containing 1
ILMN_1862871	0.5167	0.0199	2.39526	-3.33714	0.0452
ILMN_1683082	0.5167	0.0199	2.39519	-3.33728	0.251	RPUSD1	RNA pseudouridylate synthase domain containing 1
ILMN_2319996	0.5167	0.0199	-2.3951	-3.33746	-0.153	RPL3	ribosomal protein L3
ILMN_1651364	0.5169	0.0199	-2.39468	-3.33832	-0.186	PCBD2	pterin-4 alpha-carbinolamine dehydratase 2
ILMN_1795911	0.5169	0.0199	-2.39452	-3.33866	-0.288	TTC37	tetratricopeptide repeat domain 37
ILMN_1835877	0.5169	0.02	-2.39412	-3.33946	-0.0563
ILMN_1662848	0.5169	0.02	-2.39409	-3.33952	-0.155	TXNDC15	thioredoxin domain containing 15
ILMN_1698685	0.5169	0.02	2.39385	-3.34001	0.206	MATN2	matrilin 2
ILMN_1762308	0.5173	0.02	-2.39321	-3.34133	-0.287
ILMN_1689110	0.5173	0.02	2.39286	-3.34203	0.201	NOB1	NIN1/PSMD8 binding protein 1 homolog
ILMN_1660027	0.5173	0.02	-2.3927	-3.34236	-0.214	FCGR2B	Fc fragment of IgG receptor IIb
ILMN_1899979	0.5173	0.02	-2.39269	-3.34238	-0.0448
ILMN_1859595	0.5181	0.0201	-2.39171	-3.34439	-0.044
ILMN_1736568	0.5181	0.0201	2.39169	-3.34442	0.217	CASP2	caspase 2
ILMN_1827034	0.5182	0.0201	2.39099	-3.34584	0.0559
ILMN_1914965	0.5182	0.0201	2.39089	-3.34604	0.0557
ILMN_1884847	0.5182	0.0201	-2.3908	-3.34623	-0.044
ILMN_2402798	0.5182	0.0201	2.39061	-3.34661	0.27	AP2M1	adaptor related protein complex 2 mu 1 subunit
ILMN_1906754	0.5182	0.0202	-2.39007	-3.34773	-0.0403
ILMN_1860758	0.5182	0.0202	-2.38985	-3.34817	-0.0479
ILMN_1726210	0.5182	0.0202	-2.38984	-3.34819	-0.438	GPIHBP1	glycosylphosphatidylinositol anchored high density lipoprotein binding protein 1
ILMN_2154671	0.5182	0.0202	2.38983	-3.34822	0.361	COX6B1	cytochrome c oxidase subunit 6B1
ILMN_2268241	0.5182	0.0202	-2.38944	-3.34899	-0.0611	ABL1	ABL proto-oncogene 1, non-receptor tyrosine kinase
ILMN_1774802	0.5182	0.0202	-2.38909	-3.34972	-0.0603
ILMN_2323491	0.5182	0.0202	2.38884	-3.35022	0.213	NUP62	nucleoporin 62
ILMN_2087656	0.5182	0.0202	-2.38869	-3.35052	-0.515	SLCO2B1	solute carrier organic anion transporter family member 2B1
ILMN_1680091	0.5182	0.0202	2.38853	-3.35085	0.274	POP7	POP7 homolog, ribonuclease P/MRP subunit
ILMN_1766079	0.5182	0.0202	-2.38838	-3.35115	-0.304	SULT1C2	sulfotransferase family 1C member 2
ILMN_2382990	0.5182	0.0202	2.38826	-3.3514	0.281	HK1	hexokinase 1
ILMN_1790987	0.5182	0.0203	2.38792	-3.35209	0.252	HUWE1	HECT, UBA and WWE domain containing 1, E3 ubiquitin protein ligase
ILMN_2411794	0.5182	0.0203	-2.38789	-3.35216	-0.288	PTPRA	protein tyrosine phosphatase, receptor type A
ILMN_2170625	0.5182	0.0203	-2.38759	-3.35277	-0.445
ILMN_1721046	0.5182	0.0203	2.38753	-3.3529	0.543	PTMS	parathymosin
ILMN_2372040	0.5182	0.0203	2.38736	-3.35324	0.342	MTFP1	mitochondrial fission process 1
ILMN_1665289	0.5183	0.0203	-2.3868	-3.35438	-0.253	OGFOD3	2-oxoglutarate and iron dependent oxygenase domain containing 3
ILMN_1850533	0.5183	0.0203	-2.38664	-3.35469	-0.0405	LOC102723703	uncharacterized LOC102723703
ILMN_1747943	0.5183	0.0203	2.38653	-3.35493	0.104	ZNF695	zinc finger protein 695
ILMN_1709474	0.5183	0.0203	2.3863	-3.3554	0.245	ALMS1	ALMS1, centrosome and basal body associated protein
ILMN_1702759	0.5183	0.0204	-2.386	-3.356	-0.31	TMX4	thioredoxin related transmembrane protein 4
ILMN_1660898	0.5183	0.0204	-2.38573	-3.35655	-0.0485
ILMN_1769201	0.5183	0.0204	-2.38559	-3.35684	-0.433	ELF3	E74 like ETS transcription factor 3
ILMN_1699709	0.5183	0.0204	-2.38555	-3.35693	-0.046	RFC5	replication factor C subunit 5
ILMN_1723274	0.5187	0.0204	-2.38503	-3.35797	-0.0603	GPR55	G protein-coupled receptor 55
ILMN_1730972	0.5191	0.0204	2.38452	-3.35901	0.0409
ILMN_1759211	0.5197	0.0205	-2.38381	-3.36046	-0.0478
ILMN_1686862	0.5197	0.0205	-2.38353	-3.36103	-0.112	HLX	H2.0 like homeobox
ILMN_1864442	0.5197	0.0205	2.3834	-3.36129	0.0488	GABRR2	gamma-aminobutyric acid type A receptor rho2 subunit
ILMN_2360229	0.5197	0.0205	2.38316	-3.36179	0.324	MAPKAP1	mitogen-activated protein kinase associated protein 1
ILMN_1781465	0.5203	0.0205	2.38254	-3.36305	0.0662
ILMN_1912926	0.5206	0.0206	2.38178	-3.36458	0.0364
ILMN_1856378	0.5206	0.0206	2.38123	-3.3657	0.0372
ILMN_1720300	0.5206	0.0206	2.38117	-3.36582	0.045	PRR5	proline rich 5
ILMN_1654722	0.5206	0.0206	2.38112	-3.36592	0.119	MPV17L	MPV17 mitochondrial inner membrane protein like
ILMN_1785732	0.5206	0.0206	2.38059	-3.367	0.377	TNFAIP6	TNF alpha induced protein 6
ILMN_1787897	0.5206	0.0206	-2.38057	-3.36703	-0.304	CXCL1	C-X-C motif chemokine ligand 1
ILMN_1772527	0.5206	0.0206	2.38055	-3.36708	0.281	ATG101	autophagy related 101
ILMN_1768795	0.5206	0.0206	-2.38047	-3.36725	-0.0587	RNF113B	ring finger protein 113B
ILMN_1654427	0.5206	0.0206	2.38026	-3.36766	0.0473
ILMN_1685115	0.5206	0.0207	-2.38021	-3.36778	-0.095	HEXIM1	hexamethylene bisacetamide inducible 1
ILMN_1736101	0.5212	0.0207	2.37948	-3.36925	0.0463	GLIS1	GLIS family zinc finger 1
ILMN_1797189	0.5212	0.0207	-2.37899	-3.37025	-0.161	MAP3K12	mitogen-activated protein kinase kinase kinase 12
ILMN_1653524	0.5212	0.0207	-2.3788	-3.37063	-0.0664	SIKE1	suppressor of IKBKE 1
ILMN_1751886	0.5212	0.0207	-2.37864	-3.37095	-0.569	REC8	REC8 meiotic recombination protein
ILMN_1859552	0.5212	0.0207	-2.37863	-3.37098	-0.049
ILMN_1704976	0.5212	0.0208	2.37817	-3.3719	0.0338
ILMN_1797425	0.5212	0.0208	-2.37778	-3.3727	-0.365	DDX55	DEAD-box helicase 55
ILMN_1914037	0.5212	0.0208	2.37762	-3.37303	0.0404	FOXP4-AS1	FOXP4 antisense RNA 1
ILMN_1681812	0.5212	0.0208	2.37751	-3.37325	0.166	HIF1AN	hypoxia inducible factor 1 alpha subunit inhibitor
ILMN_1910364	0.5212	0.0208	2.37738	-3.37351	0.051
ILMN_2085258	0.5212	0.0208	2.37685	-3.37458	0.0436	OR4D10	olfactory receptor family 4 subfamily D member 10
ILMN_1676924	0.5212	0.0208	-2.37644	-3.37542	-0.429	CD247	CD247 molecule
ILMN_1677815	0.5212	0.0208	2.37641	-3.37547	0.256	KCNH6	potassium voltage-gated channel subfamily H member 6
ILMN_2343264	0.5212	0.0209	-2.37622	-3.37587	-0.492	PRDM16	PR/SET domain 16
ILMN_2196479	0.5212	0.0209	2.37605	-3.37621	0.185	XRN2	5'-3' exoribonuclease 2
ILMN_1730325	0.5212	0.0209	2.37591	-3.37649	0.0939	FLAD1	flavin adenine dinucleotide synthetase 1
ILMN_2394102	0.5212	0.0209	2.37579	-3.37674	0.173	STRN4	striatin 4
ILMN_1824864	0.5212	0.0209	-2.37536	-3.37761	-0.046	LOC150005	uncharacterized LOC150005
ILMN_1731699	0.5212	0.0209	2.37519	-3.37796	0.35	RAB15	RAB15, member RAS oncogene family
ILMN_1658481	0.5212	0.0209	2.375	-3.37834	0.0757
ILMN_1715173	0.5212	0.0209	-2.37495	-3.37843	-0.45	RPS6KA1	ribosomal protein S6 kinase A1
ILMN_1771651	0.5212	0.0209	2.37456	-3.37923	0.239	MON1B	MON1 homolog B, secretory trafficking associated
ILMN_2088876	0.5212	0.0209	2.37447	-3.37942	0.496	MAGEC2	MAGE family member C2
ILMN_1902697	0.5212	0.0209	2.37439	-3.37958	0.0464
ILMN_1790757	0.5212	0.0209	2.37438	-3.37958	0.27	ADSL	adenylosuccinate lyase
ILMN_1825360	0.5212	0.021	-2.37427	-3.37982	-0.0553
ILMN_2273796	0.5212	0.021	2.37406	-3.38025	0.054	ANKZF1	ankyrin repeat and zinc finger domain containing 1
ILMN_1671568	0.5212	0.021	-2.37384	-3.38069	-0.52	ECHDC2	enoyl-CoA hydratase domain containing 2
ILMN_1710289	0.5219	0.021	2.37309	-3.38221	0.0431	CNTN5	contactin 5
ILMN_1705907	0.5223	0.0211	2.37236	-3.38368	0.234	NUP153	nucleoporin 153
ILMN_1830598	0.5223	0.0211	2.37233	-3.38374	0.0714
ILMN_1747314	0.5223	0.0211	2.37219	-3.38403	0.0537
ILMN_1703142	0.5228	0.0211	-2.37162	-3.38518	-0.261	2019-03-02	membrane associated ring-CH-type finger 2
ILMN_1785527	0.5228	0.0211	2.3714	-3.38562	0.0557	LY6G5B	lymphocyte antigen 6 complex, locus G5B
ILMN_1762952	0.5228	0.0211	2.37115	-3.38613	0.0578	ARTN	artemin
ILMN_1811171	0.5229	0.0211	-2.37087	-3.3867	-0.195	GPR132	G protein-coupled receptor 132
ILMN_1821024	0.5229	0.0211	-2.37061	-3.38722	-0.0425
ILMN_1812865	0.5229	0.0212	2.37046	-3.38752	0.0423
ILMN_1803408	0.5229	0.0212	2.37025	-3.38795	0.189	KRT18	keratin 18
ILMN_1805216	0.5233	0.0212	2.36976	-3.38896	0.22	GPC6	glypican 6
ILMN_1764230	0.5235	0.0212	-2.36912	-3.39024	-0.362	GNPTG	N-acetylglucosamine-1-phosphate transferase gamma subunit
ILMN_1798663	0.5235	0.0212	2.36889	-3.39071	0.0629	MAB21L2	mab-21 like 2
ILMN_1700515	0.5235	0.0212	2.36869	-3.39111	0.34	C17orf58	chromosome 17 open reading frame 58
ILMN_1735438	0.5235	0.0212	2.36867	-3.39115	0.173	GPM6B	glycoprotein M6B
ILMN_1912160	0.5235	0.0212	-2.36861	-3.39128	-0.0767	LOC729558	uncharacterized LOC729558
ILMN_1687960	0.5236	0.0213	2.36807	-3.39237	0.107	LIMK2	LIM domain kinase 2
ILMN_2244484	0.5236	0.0213	2.36792	-3.39267	0.0918	KYAT3	kynurenine aminotransferase 3
ILMN_1779488	0.5236	0.0213	-2.36778	-3.39295	-0.0546	RFX3	regulatory factor X3
ILMN_1804791	0.5236	0.0213	-2.36757	-3.39337	-0.0417
ILMN_1659464	0.5236	0.0213	2.36745	-3.39362	0.0595	FAM71F1	family with sequence similarity 71 member F1
ILMN_1750518	0.5244	0.0214	2.36648	-3.39557	0.445	ALYREF	Aly/REF export factor
ILMN_1673104	0.5244	0.0214	2.36646	-3.39562	0.0496
ILMN_1838581	0.5245	0.0214	-2.36603	-3.39648	-0.0587
ILMN_2194108	0.5245	0.0214	2.36586	-3.39683	0.14	RBMY1J	RNA binding motif protein, Y-linked, family 1, member J
ILMN_1669550	0.5245	0.0214	2.36539	-3.39778	0.409	MAD2L2	MAD2 mitotic arrest deficient-like 2 (yeast)
ILMN_1730304	0.5245	0.0214	2.36533	-3.3979	0.119	ALG10	ALG10, alpha-1,2-glucosyltransferase
ILMN_2361695	0.5245	0.0214	2.3653	-3.39796	0.255	BAG5	BCL2 associated athanogene 5
ILMN_1733991	0.5249	0.0215	2.3646	-3.39937	0.246	UBL7	ubiquitin like 7
ILMN_1795158	0.5249	0.0215	-2.36459	-3.39939	-0.319	FGR	FGR proto-oncogene, Src family tyrosine kinase
ILMN_1878554	0.5249	0.0215	2.3644	-3.39977	0.123
ILMN_1782551	0.5249	0.0215	2.36423	-3.40012	0.334	E2F5	E2F transcription factor 5
ILMN_1806165	0.525	0.0215	-2.3638	-3.40098	-0.556	HSPA6	heat shock protein family A (Hsp70) member 6
ILMN_1697440	0.525	0.0215	2.3636	-3.4014	0.291	PRPF4	pre-mRNA processing factor 4
[truncated: 46,804 more rows]

## Sheet: GSE31210
ID	adj.P.Val	P.Value	t	B	logFC	Gene.symbol	Gene.title
218865_at	0.0214	0.0028	-3.02141	-1.95422	-0.506634	2019-03-01	mitochondrial amidoxime reducing component 1
227417_at	0.000182	3.3e-06	-4.76981	4.21235	-0.569197	2019-03-02	mitochondrial amidoxime reducing component 2
AFFX-HUMGAPDH/M33197_3_at	5.64e-09	3.77e-13	7.71652	19.2672	0.464418	GAPDH	glyceraldehyde-3-phosphate dehydrogenase
215423_at	0.00045	1.25e-05	-4.46786	2.97851	-0.629653	2019-03-06	membrane associated ring-CH-type finger 6
209459_s_at	0.000171	2.99e-06	-4.79168	4.30431	-0.633845	ABAT	4-aminobutyrate aminotransferase
201986_at	5.64e-09	6.19e-13	-7.63637	18.797	-0.415829	MED13	mediator complex subunit 13
212581_x_at	8.71e-09	1.26e-12	7.52005	18.1196	0.472358	GAPDH	glyceraldehyde-3-phosphate dehydrogenase
209460_at	0.000932	3.64e-05	-4.21294	1.98933	-0.635959	ABAT	4-aminobutyrate aminotransferase
201475_x_at	3.44e-08	5.87e-12	7.26682	16.6664	0.493093	MIR6758///MARS	microRNA 6758///methionyl-tRNA synthetase
204343_at	0.0504	0.00945	-2.61762	-3.02083	-0.573546	ABCA3	ATP binding cassette subfamily A member 3
204719_at	0.00017	2.96e-06	-4.79383	4.31336	-1.16489	ABCA8	ATP binding cassette subfamily A member 8
200599_s_at	6.69e-08	1.49e-11	7.11027	15.7831	0.345604	MIR3652///HSP90B1	microRNA 3652///heat shock protein 90 beta family member 1
211378_x_at	6.69e-08	1.59e-11	7.09965	15.7236	0.223951	LOC101060363///PPIA	peptidyl-prolyl cis-trans isomerase A pseudogene///peptidylprolyl isomerase A
200968_s_at	7.09e-08	1.88e-11	7.0709	15.5628	0.471153	PPIB	peptidylprolyl isomerase B
200650_s_at	7.09e-08	1.95e-11	7.06549	15.5326	0.33794	LDHA	lactate dehydrogenase A
211972_x_at	9.59e-08	2.81e-11	7.00323	15.186	0.253586	RPLP0	ribosomal protein lateral stalk subunit P0
213671_s_at	1.12e-07	3.48e-11	6.96665	14.9833	0.435987	MIR6758///MARS	microRNA 6758///methionyl-tRNA synthetase
201293_x_at	1.22e-07	4.02e-11	6.94188	14.8463	0.223098	LOC101060363///PPIA	peptidyl-prolyl cis-trans isomerase A pseudogene///peptidylprolyl isomerase A
217733_s_at	1.54e-07	5.36e-11	6.89245	14.5741	0.282966	TMSB10	thymosin beta 10
211765_x_at	1.97e-07	7.2e-11	6.84174	14.2961	0.222097	PPIA	peptidylprolyl isomerase A
208288_at	0.0246	0.00343	-2.95746	-2.13258	-0.522605	ABCB11	ATP binding cassette subfamily B member 11
207819_s_at	0.00118	5.1e-05	4.1298	1.67738	0.55707	ABCB4	ATP binding cassette subfamily B member 4
233371_at	0.0308	0.00474	-2.85205	-2.41886	-0.548466	ABCC13	ATP binding cassette subfamily C member 13 (pseudogene)
212661_x_at	2.85e-07	1.25e-10	6.74607	13.7752	0.225866	LOC101060363///PPIA	peptidyl-prolyl cis-trans isomerase A pseudogene///peptidylprolyl isomerase A
224602_at	2.86e-07	1.35e-10	6.73288	13.7037	0.410615	C4orf3	chromosome 4 open reading frame 3
223178_s_at	2.86e-07	1.36e-10	-6.73142	13.6958	-0.491334	NT5DC1	5'-nucleotidase domain containing 1
208161_s_at	0.00912	0.00087	-3.37428	-0.907484	-0.563386	ABCC3	ATP binding cassette subfamily C member 3
209641_s_at	0.0242	0.00334	-2.96565	-2.10994	-0.55	ABCC3	ATP binding cassette subfamily C member 3
236205_at	0.00511	0.000387	-3.6029	-0.17385	-0.654361	ABCC6P1	ATP binding cassette subfamily C member 6 pseudogene 1
211036_x_at	5.82e-07	3.19e-10	6.58127	12.8891	0.263778	ANAPC5	anaphase promoting complex subunit 5
230728_at	6.2e-07	3.51e-10	6.5642	12.7982	0.461747	FKBP14	FK506 binding protein 14
223395_at	0.000133	2.11e-06	-4.86768	4.62637	-0.858906	ABI3BP	ABI family member 3 binding protein
220518_at	0.0367	0.00603	-2.77196	-2.62995	-0.534254	ABI3BP	ABI family member 3 binding protein
242960_at	6.47e-07	4.03e-10	-6.54004	12.6698	-0.499752
211787_s_at	6.48e-07	4.15e-10	6.5346	12.6409	0.326099	LOC101928634///SENP3-EIF4A1///SNORD10///SNORA48///SNORA67///EIF4A1	uncharacterized LOC101928634///SENP3-EIF4A1 readthrough (NMD candidate)///small nucleolar RNA, C/D box 10///small nucleolar RNA, H/ACA box 48///small nucleolar RNA, H/ACA box 67///eukaryotic translation initiation factor 4A1
200967_at	6.53e-07	4.3e-10	6.52821	12.607	0.389598	PPIB	peptidylprolyl isomerase B
221928_at	3.47e-05	2.97e-07	-5.28337	6.45892	-0.57359	ACACB	acetyl-CoA carboxylase beta
211978_x_at	7.49e-07	5.21e-10	6.49417	12.4268	0.211505	LOC101060363///PPIA	peptidyl-prolyl cis-trans isomerase A pseudogene///peptidylprolyl isomerase A
211072_x_at	7.83e-07	5.58e-10	6.48173	12.3611	0.202083	TUBA1B	tubulin alpha 1b
49452_at	7.32e-05	8.93e-07	-5.05328	5.42992	-0.577082	ACACB	acetyl-CoA carboxylase beta
223338_s_at	9.51e-07	7.13e-10	-6.43793	12.1305	-0.327591	ATPIF1	ATPase inhibitory factor 1
216450_x_at	9.56e-07	7.34e-10	6.43259	12.1024	0.422701	HSP90B1	heat shock protein 90 beta family member 1
43427_at	0.00011	1.61e-06	-4.92677	4.87959	-0.565283	ACACB	acetyl-CoA carboxylase beta
203832_at	9.64e-07	8.05e-10	6.41606	12.0157	0.487741	SNRPF	small nuclear ribonucleoprotein polypeptide F
214584_x_at	0.0368	0.00606	-2.77049	-2.63375	-0.51018	ACACB	acetyl-CoA carboxylase beta
219190_s_at	9.64e-07	8.17e-10	-6.41344	12.0019	-0.408386	AGO4	argonaute 4, RISC catalytic component
208335_s_at	0.00962	0.000943	-3.35094	-0.979954	-1.0153	ACKR1	atypical chemokine receptor 1 (Duffy blood group)
240189_at	7.96e-06	2.9e-08	-5.74731	8.63961	-1.07363	ACOXL	acyl-CoA oxidase-like
211296_x_at	9.8e-07	8.82e-10	6.39967	11.9299	0.164986	UBC	ubiquitin C
225426_at	9.8e-07	8.96e-10	-6.39671	11.9144	-0.361429	PPP6C	protein phosphatase 6 catalytic subunit
220845_at	0.000446	1.23e-05	-4.47132	2.99231	-0.93738	ACOXL	acyl-CoA oxidase-like
218322_s_at	9.98e-05	1.39e-06	-4.95842	5.01623	-0.720622	ACSL5	acyl-CoA synthetase long-chain family member 5
232576_at	1.14e-06	1.11e-09	-6.35822	11.7134	-0.485511
210377_at	0.00697	0.0006	-3.48056	-0.571781	-0.596046	ACSM3	acyl-CoA synthetase medium-chain family member 3
205942_s_at	0.0391	0.00662	-2.74048	-2.71136	-0.563537	ACSM3	acyl-CoA synthetase medium-chain family member 3
224882_at	9.26e-05	1.25e-06	-4.98215	5.11913	-0.550472	ACSS1	acyl-CoA synthetase short-chain family member 1
225551_at	1.45e-06	1.51e-09	-6.30188	11.4209	-0.304405	CNST	consortin, connexin sorting protein
203970_s_at	1.74e-06	1.84e-09	-6.26602	11.2356	-0.379068	PEX3	peroxisomal biogenesis factor 3
203863_at	0.00127	5.64e-05	-4.10531	1.58651	-0.945806	ACTN2	actinin alpha 2
203862_s_at	0.00604	0.000488	-3.53839	-0.385222	-0.867398	ACTN2	actinin alpha 2
205585_at	1.89e-06	2.11e-09	6.24149	11.1092	0.400762	ETV6	ETS variant 6
235970_at	2.1e-06	2.39e-09	-6.21859	10.9916	-0.449075	LCORL	ligand dependent nuclear receptor corepressor like
224426_s_at	0.0196	0.00249	-3.05921	-1.84715	-0.623619	ACTR3BP2///ACTR3BP5	ACTR3B pseudogene 2///ACTR3B pseudogene 5
208980_s_at	2.1e-06	2.48e-09	6.21146	10.955	0.276635	UBC	ubiquitin C
216705_s_at	0.000623	2.03e-05	4.35309	2.52713	0.576801	ADA	adenosine deaminase
241321_at	2.1e-06	2.53e-09	-6.20765	10.9355	-0.440231
201239_s_at	2.4e-06	2.98e-09	6.17763	10.782	0.406764	SPCS2	signal peptidase complex subunit 2
226777_at	1.13e-05	4.9e-08	5.64524	8.14804	1.25144	ADAM12	ADAM metallopeptidase domain 12
202952_s_at	2.16e-05	1.49e-07	5.42359	7.10335	1.26136	ADAM12	ADAM metallopeptidase domain 12
226100_at	2.4e-06	3.15e-09	-6.16746	10.7301	-0.334639	KMT2E	lysine methyltransferase 2E
213790_at	0.000132	2.1e-06	4.86937	4.63359	1.00138	ADAM12	ADAM metallopeptidase domain 12
205997_at	0.0111	0.00114	3.29452	-1.15326	0.53754	ADAM28	ADAM metallopeptidase domain 28
206134_at	0.0256	0.00362	2.94027	-2.17992	0.765087	ADAMDEC1	ADAM like decysin 1
222486_s_at	0.0104	0.00104	-3.32145	-1.07088	-0.566403	ADAMTS1	ADAM metallopeptidase with thrombospondin type 1 motif 1
222162_s_at	0.0119	0.00126	-3.2669	-1.23713	-0.617725	ADAMTS1	ADAM metallopeptidase with thrombospondin type 1 motif 1
239772_x_at	2.63e-06	3.65e-09	-6.14016	10.591	-0.457895	DHX30	DEAH-box helicase 30
208673_s_at	2.63e-06	3.76e-09	-6.13463	10.5629	-0.262045	SRSF3	serine and arginine rich splicing factor 3
214096_s_at	2.63e-06	3.77e-09	6.13421	10.5608	0.461719	SHMT2	serine hydroxymethyltransferase 2
202215_s_at	2.63e-06	3.84e-09	-6.13075	10.5433	-0.381746	NFYC	nuclear transcription factor Y subunit gamma
218774_at	2.63e-06	3.85e-09	6.13001	10.5395	0.294755	DCPS	decapping enzyme, scavenger
211927_x_at	2.68e-06	4.05e-09	6.12075	10.4925	0.18479	MIR3654///EEF1G	microRNA 3654///eukaryotic translation elongation factor 1 gamma
226997_at	3.83e-05	3.46e-07	5.2517	6.31515	0.653122	ADAMTS12	ADAM metallopeptidase with thrombospondin type 1 motif 12
238125_at	0.0229	0.00308	2.99152	-2.03802	0.858448	ADAMTS16	ADAM metallopeptidase with thrombospondin type 1 motif 16
226311_at	0.000755	2.69e-05	4.28636	2.26923	0.75993	ADAMTS2	ADAM metallopeptidase with thrombospondin type 1 motif 2
235649_at	6.32e-06	2.03e-08	-5.81595	8.97386	-1.87842	ADAMTS8	ADAM metallopeptidase with thrombospondin type 1 motif 8
220677_s_at	3.6e-05	3.16e-07	-5.27052	6.40051	-1.08729	ADAMTS8	ADAM metallopeptidase with thrombospondin type 1 motif 8
220676_at	0.012	0.00128	-3.26206	-1.25177	-0.566012	ADAMTS8	ADAM metallopeptidase with thrombospondin type 1 motif 8
1559296_at	0.000317	7.33e-06	-4.59044	3.47142	-0.939351	ADAMTS9-AS2	ADAMTS9 antisense RNA 2
1556364_at	0.000341	8.32e-06	-4.56121	3.35289	-0.870482	ADAMTS9-AS2	ADAMTS9 antisense RNA 2
233113_at	0.00182	9.15e-05	-3.98337	1.14093	-0.85645	ADAMTS9-AS2	ADAMTS9 antisense RNA 2
234078_at	0.00561	0.000442	-3.566	-0.295185	-0.750312	ADAMTS9-AS2	ADAMTS9 antisense RNA 2
218840_s_at	2.83e-06	4.88e-09	6.08608	10.3169	0.322485	NADSYN1	NAD synthetase 1
1562295_at	0.00655	0.00055	-3.50514	-0.492834	-0.597183	ADAMTS9-AS2	ADAMTS9 antisense RNA 2
237217_at	0.0499	0.00931	-2.62293	-3.00774	-0.51449	ADAMTSL1	ADAMTS like 1
222981_s_at	2.83e-06	5.08e-09	6.0788	10.2802	0.491237	RAB10	RAB10, member RAS oncogene family
202403_s_at	2.83e-06	5.08e-09	6.07855	10.2789	0.446218	COL1A2	collagen type I alpha 2 chain
206629_at	0.00165	7.97e-05	-4.01841	1.26778	-1.01622	ADAMTSL2	ADAMTS like 2
213974_at	0.00145	6.72e-05	-4.06155	1.42526	-0.699225	ADAMTSL3	ADAMTS like 3
203865_s_at	0.000814	2.99e-05	-4.26089	2.17167	-0.598299	ADARB1	adenosine deaminase, RNA specific B1
224570_s_at	2.83e-06	5.23e-09	-6.0733	10.2524	-0.289259	IRF2BP2	interferon regulatory factor 2 binding protein 2
225051_at	2.83e-06	5.27e-09	-6.07164	10.244	-0.394859	EPB41	erythrocyte membrane protein band 4.1
235049_at	0.019	0.00238	-3.07221	-1.81004	-0.6425	ADCY1	adenylate cyclase 1
205638_at	7.96e-06	2.93e-08	-5.74573	8.63196	-1.19189	ADGRB3	adhesion G protein-coupled receptor B3
232267_at	0.017	0.00203	-3.12255	-1.665	-0.588865	ADGRD1	adhesion G protein-coupled receptor D1
207610_s_at	9.84e-05	1.35e-06	4.96499	5.04471	0.624889	ADGRE2	adhesion G protein-coupled receptor E2
221335_x_at	3.06e-06	5.94e-09	6.04945	10.1323	0.39155	SMG9	SMG9, nonsense mediated mRNA decay factor
1553031_at	0.00888	0.00084	3.38469	-0.875042	0.635254	ADGRF4	adhesion G protein-coupled receptor F4
200021_at	3.3e-06	6.58e-09	6.03026	10.0358	0.210014	CFL1	cofilin 1
218497_s_at	3.3e-06	6.58e-09	6.03024	10.0357	0.437644	RNASEH1	ribonuclease H1
1567913_at	3.49e-06	7.01e-09	-6.01827	9.97569	-0.40472
223054_at	3.53e-06	7.19e-09	6.01357	9.95211	0.383826	DNAJB11	DnaJ heat shock protein family (Hsp40) member B11
212950_at	0.000217	4.32e-06	-4.70971	3.96154	-0.688621	ADGRF5	adhesion G protein-coupled receptor F5
214167_s_at	3.57e-06	7.39e-09	6.00858	9.92715	0.353107	RPLP0	ribosomal protein lateral stalk subunit P0
212951_at	0.000761	2.71e-05	-4.28376	2.25924	-0.74912	ADGRF5	adhesion G protein-coupled receptor F5
220404_at	0.000588	1.87e-05	4.37329	2.60585	0.846597	ADGRG3	adhesion G protein-coupled receptor G3
209866_s_at	0.000435	1.19e-05	-4.47903	3.02299	-0.89012	ADGRL3	adhesion G protein-coupled receptor L3
213251_at	3.82e-06	8.2e-09	-5.9888	9.82822	-0.27531	SMARCA5	SWI/SNF related, matrix associated, actin dependent regulator of chromatin, subfamily a, member 5
236264_at	0.0013	5.77e-05	-4.09964	1.56554	-0.891816	ADGRL3	adhesion G protein-coupled receptor L3
209867_s_at	0.00225	0.000122	-3.9092	0.875576	-0.863673	ADGRL3	adhesion G protein-coupled receptor L3
221727_at	4.22e-06	9.26e-09	-5.96587	9.71383	-0.428311	SUB1	SUB1 homolog, transcriptional regulator
242186_x_at	0.0236	0.00323	-2.9769	-2.07873	-0.675921	ADGRL3	adhesion G protein-coupled receptor L3
213646_x_at	4.31e-06	9.74e-09	5.95642	9.66678	0.241039	TUBA1B	tubulin alpha 1b
207820_at	1.86e-06	2.01e-09	-6.24979	11.152	-0.724029	ADH1A	alcohol dehydrogenase 1A (class I), alpha polypeptide
209613_s_at	1.87e-05	1.2e-07	-5.46758	7.30816	-2.17622	ADH1B	alcohol dehydrogenase 1B (class I), beta polypeptide
218996_at	4.31e-06	9.85e-09	5.95425	9.65598	0.451024	TFPT	TCF3 fusion partner
209612_s_at	4.56e-05	4.41e-07	-5.20174	6.08978	-2.08386	ADH1B	alcohol dehydrogenase 1B (class I), beta polypeptide
202754_at	4.48e-06	1.04e-08	5.94395	9.60478	0.339697	R3HDM1	R3H domain containing 1
211720_x_at	4.51e-06	1.06e-08	5.94113	9.59078	0.177401	RPLP0	ribosomal protein lateral stalk subunit P0
227167_s_at	4.65e-06	1.1e-08	-5.93406	9.55566	-0.381276	RASSF3	Ras association domain family member 3
209614_at	0.000189	3.5e-06	-4.75689	4.15824	-1.46672	ADH1B	alcohol dehydrogenase 1B (class I), beta polypeptide
206262_at	0.00231	0.000128	-3.89845	0.837465	-1.21283	ADH1C	alcohol dehydrogenase 1C (class I), gamma polypeptide
227113_at	0.000191	3.54e-06	-4.75404	4.1463	-0.542271	ADHFE1	alcohol dehydrogenase, iron containing 1
203571_s_at	0.0441	0.00784	-2.68275	-2.85842	-0.508284	ADIRF	adipogenesis regulatory factor
208856_x_at	4.74e-06	1.16e-08	5.92301	9.50089	0.180722	RPLP0	ribosomal protein lateral stalk subunit P0
235612_at	4.78e-06	1.18e-08	-5.9202	9.48695	-0.384469	PRPF38A	pre-mRNA processing factor 38A
202912_at	0.00019	3.52e-06	4.75535	4.15178	0.796642	ADM	adrenomedullin
225957_at	4.86e-06	1.22e-08	-5.91349	9.45373	-0.39494	CREBRF	CREB3 regulatory factor
220538_at	0.00318	0.000199	3.78234	0.431819	0.581936	ADM2	adrenomedullin 2
223660_at	0.00276	0.000163	3.83447	0.612613	0.748563	ADORA3	adenosine A3 receptor
237390_at	0.000178	3.19e-06	-4.77727	4.2437	-2.02965	ADRA1A	adrenoceptor alpha 1A
209869_at	0.005	0.000375	-3.61152	-0.145356	-0.726221	ADRA2A	adrenoceptor alpha 2A
229309_at	6.69e-05	7.88e-07	-5.07996	5.54739	-1.23796	ADRB1	adrenoceptor beta 1
229277_at	0.00691	0.000593	-3.48373	-0.561652	-0.523869	ADRB1	adrenoceptor beta 1
206170_at	0.000492	1.43e-05	-4.4361	2.85264	-0.67956	ADRB2	adrenoceptor beta 2
242078_at	0.000174	3.08e-06	-4.78481	4.27539	-0.868955	AFF3	AF4/FMR2 family member 3
200812_at	5.03e-06	1.35e-08	5.89431	9.35893	0.331848	CCT7	chaperonin containing TCP1 subunit 7
227198_at	0.000189	3.48e-06	-4.75779	4.16197	-1.01545	AFF3	AF4/FMR2 family member 3
205735_s_at	0.00516	0.000393	-3.59858	-0.188113	-0.56084	AFF3	AF4/FMR2 family member 3
211345_x_at	5.03e-06	1.38e-08	5.89037	9.33944	0.180649	MIR3654///EEF1G	microRNA 3654///eukaryotic translation elongation factor 1 gamma
1555907_at	0.017	0.00204	3.12092	-1.66971	0.615649	AGAP2-AS1	AGAP2 antisense RNA 1
212639_x_at	5.08e-06	1.4e-08	5.88695	9.32259	0.242192	TUBA1B	tubulin alpha 1b
220649_at	0.0424	0.00741	-2.70231	-2.80892	-0.537047	AGBL3	ATP/GTP binding protein like 3
217046_s_at	0.0519	0.00986	-2.60272	-3.05745	-0.914763	AGER	advanced glycosylation end-product specific receptor
228241_at	0.0349	0.00565	-2.79384	-2.57283	-0.81742	AGR3	anterior gradient 3, protein disulphide isomerase family member
205357_s_at	0.00445	0.000318	-3.65632	0.003734	-0.753982	AGTR1	angiotensin II receptor type 1
223026_s_at	5.21e-06	1.49e-08	5.87617	9.26943	0.280345	VPS29	VPS29, retromer complex component
1558378_a_at	8.77e-05	1.16e-06	4.99835	5.18964	1.01334	AHNAK2	AHNAK nucleoprotein 2
213327_s_at	5.28e-06	1.53e-08	-5.87077	9.24283	-0.343262	USP12	ubiquitin specific peptidase 12
202306_at	5.28e-06	1.54e-08	5.86991	9.2386	0.35249	POLR2G	RNA polymerase II subunit G
212992_at	0.000125	1.92e-06	4.88824	4.7142	1.03747	AHNAK2	AHNAK nucleoprotein 2
204551_s_at	0.029	0.00434	2.88168	-2.33936	0.552595	AHSG	alpha 2-HS glycoprotein
227942_s_at	5.56e-06	1.65e-08	5.85657	9.17299	0.427759	CRIPT	CXXC repeat containing interactor of PDZ3 domain
206513_at	0.00516	0.000393	3.59834	-0.188896	0.731729	AIM2	absent in melanoma 2
202884_s_at	5.96e-06	1.81e-08	5.83829	9.08326	0.385019	PPP2R1B	protein phosphatase 2 scaffold subunit Abeta
212308_at	5.96e-06	1.82e-08	-5.83713	9.07753	-0.419764	CLASP2	cytoplasmic linker associated protein 2
239828_at	0.00907	0.000863	-3.37677	-0.899726	-0.582479	AK9	adenylate kinase 9
237281_at	0.0311	0.00481	-2.84754	-2.43091	-0.950969	AKAP14	A-kinase anchoring protein 14
222628_s_at	5.96e-06	1.83e-08	-5.83592	9.07161	-0.320959	REV1	REV1, DNA directed polymerase
213604_at	5.96e-06	1.84e-08	-5.83498	9.06701	-0.357743	TCEB3	transcription elongation factor B subunit 3
227691_at	0.00868	0.000813	3.39384	-0.846433	0.650297	AKAP8L	A-kinase anchoring protein 8 like
212224_at	0.0217	0.00285	-3.01598	-1.96949	-0.623855	ALDH1A1	aldehyde dehydrogenase 1 family member A1
1556841_a_at	0.000784	2.83e-05	4.27373	2.22077	0.862188	ALDH1L2	aldehyde dehydrogenase 1 family member L2
204942_s_at	0.00126	5.59e-05	4.1075	1.59462	0.902508	ALDH3B2	aldehyde dehydrogenase 3 family member B2
218070_s_at	6.12e-06	1.95e-08	5.82446	9.01545	0.379927	GMPPA	GDP-mannose pyrophosphorylase A
202153_s_at	6.22e-06	1.99e-08	5.82025	8.99487	0.418716	NUP62	nucleoporin 62
208211_s_at	0.0141	0.00159	3.19686	-1.44694	0.675845	ALK	anaplastic lymphoma receptor tyrosine kinase
208212_s_at	0.0231	0.00312	2.98726	-2.04991	0.652679	ALK	anaplastic lymphoma receptor tyrosine kinase
206714_at	0.0034	0.000218	-3.75748	0.346366	-0.807127	ALOX15B	arachidonate 15-lipoxygenase, type B
228367_at	0.000125	1.92e-06	4.88853	4.71543	1.09154	ALPK2	alpha kinase 2
201033_x_at	6.76e-06	2.23e-08	5.79872	8.88965	0.175015	RPLP0	ribosomal protein lateral stalk subunit P0
214095_at	6.93e-06	2.29e-08	5.79282	8.86089	0.408978	SHMT2	serine hydroxymethyltransferase 2
211619_s_at	0.00019	3.53e-06	-4.75465	4.14883	-0.587353	ALPPL2///ALPP	alkaline phosphatase, placental like 2///alkaline phosphatase, placental
226765_at	7.12e-06	2.39e-08	-5.78515	8.82349	-0.428656	SPTBN1	spectrin beta, non-erythrocytic 1
217768_at	7.12e-06	2.4e-08	5.78439	8.8198	0.210516	C14orf166	chromosome 14 open reading frame 166
239458_at	0.000919	3.55e-05	-4.21885	2.01174	-0.82308	ALS2CR12	amyotrophic lateral sclerosis 2 chromosome region candidate 12
211058_x_at	7.23e-06	2.49e-08	5.77732	8.7854	0.195176	TUBA1B	tubulin alpha 1b
205608_s_at	3.59e-05	3.12e-07	-5.27311	6.41226	-0.886148	ANGPT1	angiopoietin 1
205609_at	0.000328	7.75e-06	-4.57755	3.41907	-0.887506	ANGPT1	angiopoietin 1
221134_at	0.0266	0.00384	-2.9209	-2.23296	-0.556751	ANGPT4	angiopoietin 4
239183_at	4.96e-05	4.96e-07	-5.17726	5.97994	-1.18992	ANGPTL1	angiopoietin like 1
201969_at	7.37e-06	2.58e-08	-5.77025	8.75097	-0.436754	NASP	nuclear autoantigenic sperm protein
230029_x_at	7.37e-06	2.59e-08	-5.76954	8.74753	-0.250031	UBR3	ubiquitin protein ligase E3 component n-recognin 3 (putative)
231773_at	0.00104	4.3e-05	-4.17207	1.83532	-0.840163	ANGPTL1	angiopoietin like 1
218165_at	7.63e-06	2.71e-08	-5.76035	8.70286	-0.350256	MEAF6	MYST/Esa1 associated factor 6
209251_x_at	7.63e-06	2.72e-08	5.76001	8.70123	0.254436	TUBA1C	tubulin alpha 1c
224339_s_at	0.00187	9.57e-05	-3.97205	1.10015	-0.847607	ANGPTL1	angiopoietin like 1
221009_s_at	0.00079	2.86e-05	4.27139	2.21182	0.976261	ANGPTL4	angiopoietin like 4
223167_s_at	7.96e-06	2.89e-08	-5.74826	8.64424	-0.329146	USP25	ubiquitin specific peptidase 25
223333_s_at	0.00852	0.00079	3.40234	-0.819789	0.964055	ANGPTL4	angiopoietin like 4
217886_at	7.96e-06	2.91e-08	-5.74671	8.63671	-0.284192	EPS15	epidermal growth factor receptor pathway substrate 15
232606_at	0.0366	0.00601	-2.7731	-2.62698	-0.899829	ANK2	ankyrin 2, neuronal
202797_at	8.05e-06	2.97e-08	-5.74277	8.61762	-0.327267	SACM1L	SAC1 suppressor of actin mutations 1-like (yeast)
226193_x_at	8.45e-06	3.14e-08	5.73229	8.56685	0.378948	CBWD7///CBWD6///CBWD3///CBWD5///CBWD2///CBWD1	COBW domain containing 7///COBW domain containing 6///COBW domain containing 3///COBW domain containing 5///COBW domain containing 2///COBW domain containing 1
218043_s_at	8.65e-06	3.23e-08	-5.72682	8.5404	-0.302343	AZI2	5-azacytidine induced 2
201543_s_at	8.65e-06	3.24e-08	5.72596	8.53625	0.47447	SAR1A	secretion associated Ras related GTPase 1A
232366_at	8.75e-06	3.3e-08	-5.72258	8.51992	-0.388713	KIAA0232	KIAA0232
238786_at	0.00716	0.000622	-3.47047	-0.604065	-0.547274	ANK3	ankyrin 3, node of Ranvier (ankyrin G)
216550_x_at	7.35e-05	8.98e-07	-5.05211	5.42479	-0.508125	ANKRD12	ankyrin repeat domain 12
238332_at	3.7e-05	3.28e-07	-5.26314	6.36703	-1.10921	ANKRD29	ankyrin repeat domain 29
229308_at	4.6e-05	4.46e-07	-5.19918	6.07826	-1.26335	ANKRD29	ankyrin repeat domain 29
230083_at	8.96e-06	3.46e-08	-5.7135	8.47604	-0.467889	USP53	ubiquitin specific peptidase 53
1554178_a_at	9.01e-06	3.49e-08	-5.71137	8.46578	-0.389412	FAM126B	family with sequence similarity 126 member B
1556183_at	0.0243	0.00335	2.96454	-2.113	0.544334	ANKRD36BP2	ankyrin repeat domain 36B pseudogene 2
208639_x_at	9.19e-06	3.6e-08	5.70568	8.43832	0.388762	PDIA6	protein disulfide isomerase family A member 6
228471_at	0.00017	2.97e-06	-4.7928	4.30901	-0.537793	ANKRD44	ankyrin repeat domain 44
222555_s_at	9.36e-06	3.7e-08	5.7004	8.41288	0.352764	MRPL44	mitochondrial ribosomal protein L44
207668_x_at	9.76e-06	3.87e-08	5.69132	8.36914	0.386135	PDIA6	protein disulfide isomerase family A member 6
222663_at	9.79e-06	3.9e-08	-5.68972	8.36147	-0.474108	RIOK2	RIO kinase 2
1552619_a_at	0.000182	3.3e-06	4.76988	4.21265	0.966653	ANLN	anillin actin binding protein
222608_s_at	0.00121	5.29e-05	4.12106	1.64488	0.878313	ANLN	anillin actin binding protein
215241_at	9.94e-05	1.38e-06	-4.95988	5.02256	-0.978248	ANO3	anoctamin 3
212530_at	9.96e-06	4.05e-08	-5.68281	8.32821	-0.285924	NEK7	NIMA related kinase 7
236420_s_at	0.0184	0.00228	-3.08652	-1.76902	-0.53763	ANO4	anoctamin 4
229749_at	0.0404	0.00693	-2.72527	-2.75039	-0.535395	ANO4	anoctamin 4
244052_at	1.01e-05	4.15e-08	5.67786	8.30442	0.459589	CBR4	carbonyl reductase 4
212726_at	1.01e-05	4.16e-08	-5.67758	8.30307	-0.342714	PHF2	PHD finger protein 2
228604_at	1.03e-05	4.26e-08	-5.67263	8.2793	-0.399174	FAM76A	family with sequence similarity 76 member A
218197_s_at	1.03e-05	4.3e-08	-5.67068	8.26993	-0.41028	OXR1	oxidation resistance 1
229313_at	0.00991	0.000981	-3.33938	-1.01569	-0.702636	ANO5	anoctamin 5
212333_at	1.03e-05	4.33e-08	5.66943	8.26394	0.282449	FAM98A	family with sequence similarity 98 member A
227660_at	0.000511	1.51e-05	4.42288	2.80045	0.632276	ANTXR1	anthrax toxin receptor 1
203727_at	1.06e-05	4.51e-08	5.66163	8.22655	0.284342	SKIV2L	Ski2 like RNA helicase
221782_at	1.09e-05	4.63e-08	5.65636	8.20126	0.453585	DNAJC10	DnaJ heat shock protein family (Hsp40) member C10
223368_s_at	1.09e-05	4.67e-08	5.65473	8.19345	0.493447	NTMT1	N-terminal Xaa-Pro-Lys N-methyltransferase 1
220092_s_at	0.002	0.000105	3.94882	1.01678	0.589371	ANTXR1	anthrax toxin receptor 1
206238_s_at	1.13e-05	4.87e-08	5.64667	8.15491	0.333798	YAF2	YY1 associated factor 2
220093_at	0.046	0.00833	2.6616	-2.91158	0.595964	ANTXR1	anthrax toxin receptor 1
204894_s_at	5.27e-05	5.41e-07	-5.15889	5.89777	-0.94592	AOC3	amine oxidase, copper containing 3
225939_at	1.17e-05	5.11e-08	-5.63713	8.10925	-0.449284	EIF4E3	eukaryotic translation initiation factor 4E family member 3
205195_at	0.0251	0.00351	2.94997	-2.15324	0.521778	AP1S1	adaptor related protein complex 1 sigma 1 subunit
1555731_a_at	0.0238	0.00325	2.97427	-2.08603	0.562958	AP1S3	adaptor related protein complex 1 sigma 3 subunit
214077_x_at	1.18e-05	5.24e-08	-5.63195	8.0845	-0.420837	MEIS3P1	Meis homeobox 3 pseudogene 1
200689_x_at	1.18e-05	5.28e-08	5.63074	8.07875	0.17149	MIR3654///EEF1G	microRNA 3654///eukaryotic translation elongation factor 1 gamma
236221_at	0.0316	0.00492	2.84034	-2.45007	0.54849	AP4B1	adaptor related protein complex 4 beta 1 subunit
235548_at	3.01e-05	2.4e-07	5.32701	6.65809	1.21998	APCDD1L	APC down-regulated 1 like
AFFX-HUMRGE/M10098_5_at	1.19e-05	5.35e-08	5.62814	8.06631	0.295614
56821_at	1.19e-05	5.36e-08	5.62772	8.0643	0.343611	SLC38A7	solute carrier family 38 member 7
222856_at	0.000831	3.08e-05	4.25295	2.14136	0.536928	APLN	apelin
205216_s_at	0.0011	4.63e-05	-4.15377	1.76679	-1.45525	APOH	apolipoprotein H
209047_at	0.0512	0.00967	-2.60942	-3.04101	-0.565914	AQP1	aquaporin 1 (Colton blood group)
201049_s_at	1.22e-05	5.61e-08	5.61869	8.02124	0.164731	RPS18	ribosomal protein S18
232412_at	1.23e-05	5.67e-08	-5.61648	8.01073	-0.45134	FBXL20	F-box and leucine rich repeat protein 20
211047_x_at	1.24e-05	5.77e-08	5.61319	7.99506	0.451517	AP2S1	adaptor related protein complex 2 sigma 1 subunit
201546_at	1.24e-05	5.77e-08	5.61308	7.9945	0.252407	TRIP12	thyroid hormone receptor interactor 12
225385_s_at	1.24e-05	5.79e-08	-5.6125	7.99175	-0.330619	HNRNPLL	heterogeneous nuclear ribonucleoprotein L like
235240_at	1.24e-05	5.83e-08	-5.61126	7.98583	-0.46027	ATXN3	ataxin 3
234915_s_at	1.24e-05	5.84e-08	5.6109	7.98415	0.351721	DENR	density regulated re-initiation and release factor
39248_at	0.003	0.000183	-3.80349	0.504908	-0.552698	AQP3	aquaporin 3 (Gill blood group)
216977_x_at	1.24e-05	5.89e-08	5.60915	7.9758	0.459257	SNRPA1	small nuclear ribonucleoprotein polypeptide A'
203747_at	0.0141	0.00158	-3.19765	-1.4446	-0.505966	AQP3	aquaporin 3 (Gill blood group)
210066_s_at	0.00922	0.000886	-3.36901	-0.9239	-0.849456	AQP4	aquaporin 4
210906_x_at	0.00977	0.000963	-3.34499	-0.998363	-0.908354	AQP4	aquaporin 4
210067_at	0.0197	0.0025	-3.0574	-1.85231	-1.0476	AQP4	aquaporin 4
225465_at	1.28e-05	6.23e-08	-5.59809	7.92317	-0.483938	MAGI1	membrane associated guanylate kinase, WW and PDZ domain containing 1
227407_at	1.28e-05	6.23e-08	-5.59803	7.92287	-0.454694	TAPT1	transmembrane anterior posterior transformation 1
226228_at	0.0472	0.00862	-2.64964	-2.94146	-1.03441	AQP4	aquaporin 4
226192_at	0.00483	0.000357	-3.62471	-0.101613	-0.54304	AR	androgen receptor
210090_at	0.000905	3.48e-05	-4.22405	2.03141	-1.10304	ARC	activity regulated cytoskeleton associated protein
210257_x_at	1.32e-05	6.47e-08	5.59054	7.88733	0.390351	CUL4B	cullin 4B
226737_at	1.32e-05	6.56e-08	-5.58775	7.87405	-0.357416	SLC25A42	solute carrier family 25 member 42
223006_s_at	1.32e-05	6.57e-08	-5.58762	7.87345	-0.409046	TMEM245	transmembrane protein 245
1557285_at	0.000962	3.83e-05	-4.20027	1.94146	-0.906513	AREG	amphiregulin
231856_at	6.47e-05	7.51e-07	-5.08993	5.59145	-0.736201	ARFGEF3	ARFGEF family member 3
228051_at	0.0029	0.000175	-3.81612	0.548724	-0.527581	ARFGEF3	ARFGEF family member 3
209103_s_at	1.39e-05	7.01e-08	5.57483	7.81276	0.349284	UFD1L	ubiquitin fusion degradation 1 like (yeast)
208924_at	1.41e-05	7.12e-08	-5.57159	7.79743	-0.253566	RNF11	ring finger protein 11
217496_s_at	1.41e-05	7.15e-08	5.57073	7.79335	0.400911	IDE	insulin degrading enzyme
229355_at	1.42e-05	7.24e-08	-5.56839	7.78227	-0.303112	UBE2D3	ubiquitin conjugating enzyme E2 D3
222702_x_at	1.43e-05	7.29e-08	5.56681	7.77478	0.451376	CRIPT	CXXC repeat containing interactor of PDZ3 domain
242098_at	0.00508	0.000383	-3.60517	-0.166357	-0.510077	ARFGEF3	ARFGEF family member 3
228368_at	0.000217	4.32e-06	-4.70987	3.96218	-0.730311	ARHGAP20	Rho GTPase activating protein 20
211943_x_at	1.45e-05	7.52e-08	5.56079	7.7463	0.165413	LOC101928826///TPT1	uncharacterized LOC101928826///tumor protein, translationally-controlled 1
212695_at	1.45e-05	7.52e-08	-5.56068	7.74578	-0.454202	CRY2	cryptochrome circadian clock 2
208642_s_at	1.46e-05	7.58e-08	5.55927	7.73909	0.254202	XRCC5	X-ray repair cross complementing 5
230466_s_at	1.46e-05	7.61e-08	-5.55829	7.73446	-0.431198	RASSF3	Ras association domain family member 3
218140_x_at	1.47e-05	7.69e-08	5.55634	7.72527	0.350952	SRPRB	SRP receptor beta subunit
209853_s_at	1.48e-05	7.83e-08	5.55275	7.70826	0.473492	PSME3	proteasome activator subunit 3
225082_at	1.48e-05	7.86e-08	5.55195	7.70449	0.277689	CPSF3	cleavage and polyadenylation specific factor 3
206298_at	0.00789	0.000709	3.43336	-0.722036	0.647665	ARHGAP22	Rho GTPase activating protein 22
1560765_a_at	0.0186	0.00231	3.08162	-1.78309	0.554211	ARHGAP22	Rho GTPase activating protein 22
225276_at	1.48e-05	7.9e-08	-5.55101	7.70004	-0.482118	GSPT1	G1 to S phase transition 1
225048_at	1.48e-05	7.93e-08	-5.55027	7.69655	-0.337942	PHF10	PHD finger protein 10
212222_at	1.48e-05	7.93e-08	-5.55021	7.69628	-0.281096	PSME4	proteasome activator subunit 4
230803_s_at	0.00324	0.000205	-3.77455	0.404985	-0.512551	ARHGAP24	Rho GTPase activating protein 24
205414_s_at	0.00511	0.000387	-3.6025	-0.175175	-0.524335	ARHGAP44	Rho GTPase activating protein 44
233903_s_at	2.31e-05	1.65e-07	-5.40326	7.00911	-0.615872	ARHGEF26	Rho guanine nucleotide exchange factor 26
218512_at	1.53e-05	8.34e-08	5.54031	7.64954	0.39566	WDR12	WD repeat domain 12
222752_s_at	1.54e-05	8.38e-08	5.53922	7.64439	0.379005	TMEM206	transmembrane protein 206
214687_x_at	1.56e-05	8.53e-08	5.53577	7.62813	0.416123	ALDOA	aldolase, fructose-bisphosphate A
206034_at	1.56e-05	8.59e-08	5.53442	7.62179	0.493583	SERPINB8	serpin family B member 8
201129_at	1.57e-05	8.63e-08	-5.53352	7.61751	-0.303185	SRSF7	serine and arginine rich splicing factor 7
204516_at	1.58e-05	8.72e-08	-5.53135	7.60733	-0.389986	ATXN7	ataxin 7
204792_s_at	1.6e-05	8.85e-08	-5.52847	7.59374	-0.449551	IFT140	intraflagellar transport 140
203840_at	1.6e-05	8.9e-08	-5.52726	7.58806	-0.320926	BLZF1	basic leucine zipper nuclear factor 1
227197_at	0.00085	3.19e-05	-4.24499	2.11101	-0.570683	ARHGEF26	Rho guanine nucleotide exchange factor 26
208641_s_at	1.61e-05	9.01e-08	5.52485	7.57668	0.27104	RAC1	ras-related C3 botulinum toxin substrate 1 (rho family, small GTP binding protein Rac1)
236575_at	0.00145	6.72e-05	-4.0614	1.42473	-0.980302	ARHGEF26-AS1	ARHGEF26 antisense RNA 1
1554003_at	4.96e-05	4.95e-07	-5.17779	5.9823	-0.662428	ARHGEF28	Rho guanine nucleotide exchange factor 28
223416_at	1.62e-05	9.15e-08	5.5217	7.56187	0.36893	SF3B6	splicing factor 3b subunit 6
229062_at	0.00423	0.000296	3.67547	0.067979	0.590762	ARL9	ADP ribosylation factor like GTPase 9
224204_x_at	0.000312	7.15e-06	4.59583	3.49336	1.4076	ARNTL2	aryl hydrocarbon receptor nuclear translocator like 2
215157_x_at	1.62e-05	9.24e-08	5.5198	7.55292	0.168415	PABPC1	poly(A) binding protein cytoplasmic 1
220658_s_at	0.001	4.06e-05	4.18586	1.88714	1.12023	ARNTL2	aryl hydrocarbon receptor nuclear translocator like 2
223586_at	0.00216	0.000116	3.9238	0.927469	0.700554	ARNTL2	aryl hydrocarbon receptor nuclear translocator like 2
217818_s_at	0.0121	0.00129	3.2589	-1.2613	0.760297	ARPC4	actin related protein 2/3 complex subunit 4
222912_at	6.21e-05	6.98e-07	-5.10558	5.66066	-0.515126	ARRB1	arrestin beta 1
213935_at	1.63e-05	9.47e-08	-5.51484	7.52961	-0.447289	ABHD5	abhydrolase domain containing 5
224721_at	1.63e-05	9.5e-08	5.51438	7.52743	0.261362	WDR75	WD repeat domain 75
225799_at	1.63e-05	9.52e-08	5.51377	7.52457	0.45391	LOC101930489///MIR4435-2HG///LINC00152	uncharacterized LOC101930489///MIR4435-2 host gene///long intergenic non-protein coding RNA 152
242496_at	0.00028	6.17e-06	-4.62943	3.6305	-1.12492	ART4	ADP-ribosyltransferase 4 (Dombrock blood group)
206555_s_at	1.65e-05	9.69e-08	-5.5104	7.50874	-0.37693	THUMPD1	THUMP domain containing 1
228012_at	1.65e-05	9.73e-08	-5.50942	7.50416	-0.303003	SNHG4///MATR3	small nucleolar RNA host gene 4///matrin 3
227669_at	1.67e-05	9.88e-08	-5.50641	7.48999	-0.422667	MPC2	mitochondrial pyruvate carrier 2
207220_at	0.000493	1.43e-05	-4.43526	2.84933	-0.580433	ART4	ADP-ribosyltransferase 4 (Dombrock blood group)
200822_x_at	1.67e-05	9.93e-08	5.50549	7.48567	0.457247	TPI1	triosephosphate isomerase 1
227915_at	0.0395	0.00671	-2.7359	-2.72313	-0.528534	ASB2	ankyrin repeat and SOCS box containing 2
206030_at	0.000395	1.02e-05	-4.51428	3.16387	-0.846415	ASPA	aspartoacylase
201090_x_at	1.71e-05	1.03e-07	5.49877	7.45416	0.241172	TUBA1B	tubulin alpha 1b
230154_at	1.71e-05	1.03e-07	-5.49775	7.44936	-0.415348	WAC	WW domain containing adaptor with coiled-coil
235378_at	1.71e-05	1.03e-07	-5.49734	7.44746	-0.465979	FAM161B	family with sequence similarity 161 member B
228807_at	0.0235	0.00321	-2.9787	-2.07372	-0.676494	ASPA	aspartoacylase
201584_s_at	1.71e-05	1.04e-07	5.49681	7.44497	0.400168	DDX39A	DEAD-box helicase 39A
219918_s_at	0.000981	3.93e-05	4.19402	1.91789	0.849765	ASPM	abnormal spindle microtubule assembly
212855_at	1.72e-05	1.05e-07	-5.49393	7.43145	-0.274098	DCUN1D4	defective in cullin neddylation 1 domain containing 4
232238_at	0.00521	0.000398	3.59507	-0.199695	0.614332	ASPM	abnormal spindle microtubule assembly
225032_at	1.72e-05	1.06e-07	5.49325	7.42825	0.267295	LOC101928615///FNDC3B	uncharacterized LOC101928615///fibronectin type III domain containing 3B
233091_at	0.0177	0.00215	3.10452	-1.71717	0.670513	ATAD3B	ATPase family, AAA domain containing 3B
1554420_at	0.000445	1.23e-05	4.47197	2.99487	0.700567	ATF3	activating transcription factor 3
226675_s_at	1.8e-05	1.12e-07	-5.48174	7.37438	-0.374976	MALAT1	metastasis associated lung adenocarcinoma transcript 1 (non-protein coding)
202672_s_at	0.00283	0.00017	-3.82417	0.576718	-0.778625	ATF3	activating transcription factor 3
32088_at	1.82e-05	1.14e-07	-5.47823	7.35795	-0.333633	BLZF1	basic leucine zipper nuclear factor 1
202319_at	1.84e-05	1.15e-07	-5.47627	7.34877	-0.404019	SENP6	SUMO1/sentrin specific peptidase 6
201315_x_at	1.84e-05	1.16e-07	5.47456	7.34078	0.33185	IFITM2	interferon induced transmembrane protein 2
201151_s_at	1.84e-05	1.16e-07	-5.47439	7.33998	-0.381893	MBNL1	muscleblind like splicing regulator 1
1553390_at	0.0093	0.000899	-3.36474	-0.93717	-0.537272	ATG9B	autophagy related 9B
200682_s_at	1.84e-05	1.16e-07	5.47357	7.33617	0.380715	UBE2L3	ubiquitin conjugating enzyme E2 L3
228890_at	0.0034	0.000218	-3.75724	0.345526	-0.725797	ATOH8	atonal bHLH transcription factor 8
217923_at	1.84e-05	1.17e-07	-5.4728	7.33256	-0.31061	PEF1	penta-EF-hand domain containing 1
225315_at	1.87e-05	1.19e-07	5.46885	7.31411	0.387818	MRPL21	mitochondrial ribosomal protein L21
1556854_at	9.62e-05	1.31e-06	4.97192	5.07472	0.766611	ATP11A-AS1	ATP11A antisense RNA 1
1557136_at	3.72e-05	3.33e-07	-5.25983	6.35198	-1.33823	ATP13A4	ATPase 13A4
1559571_a_at	0.0448	0.00803	-2.67462	-2.87889	-0.678504	ATP13A4	ATPase 13A4
231512_at	0.000361	8.98e-06	-4.54368	3.2821	-1.8481	ATP13A4-AS1	ATP13A4 antisense RNA 1
225308_s_at	1.93e-05	1.25e-07	-5.45954	7.27064	-0.345855	TANC1	tetratricopeptide repeat, ankyrin repeat and coiled-coil containing 1
236133_x_at	1.93e-05	1.26e-07	-5.45798	7.26337	-0.432787	ZNF254	zinc finger protein 254
225764_at	1.93e-05	1.26e-07	5.45758	7.26148	0.371146	ETV6	ETS variant 6
200966_x_at	1.93e-05	1.26e-07	5.45718	7.25963	0.433685	ALDOA	aldolase, fructose-bisphosphate A
243585_at	0.00319	0.0002	-3.78007	0.423982	-0.642703	ATP13A5	ATPase 13A5
225106_s_at	1.96e-05	1.28e-07	5.45397	7.24468	0.373287	OGFOD1	2-oxoglutarate and iron dependent oxygenase domain containing 1
203296_s_at	0.000341	8.32e-06	-4.56136	3.3535	-1.16262	ATP1A2	ATPase Na+/K+ transporting subunit alpha 2
242036_x_at	0.0518	0.00984	-2.60333	-3.05595	-0.537125	ATP2B3	ATPase plasma membrane Ca2+ transporting 3
207139_at	0.0455	0.00821	2.66668	-2.89885	0.500208	ATP4A	ATPase H+/K+ transporting alpha subunit
228709_at	1.96e-05	1.31e-07	-5.45036	7.22784	-0.458393	TPR	translocated promoter region, nuclear basket protein
229114_at	1.96e-05	1.31e-07	-5.45017	7.22695	-0.425848	GAB1	GRB2 associated binding protein 1
232946_s_at	1.96e-05	1.31e-07	5.44999	7.22612	0.279593	NADSYN1	NAD synthetase 1
225047_at	1.97e-05	1.32e-07	-5.44903	7.22164	-0.447914	NUP58	nucleoporin 58
237400_at	0.000114	1.7e-06	-4.91521	4.82989	-0.605465	ATP5S	ATP synthase, H+ transporting, mitochondrial Fo complex subunit s (factor B)
213106_at	5.23e-06	1.5e-08	-5.8743	9.26022	-0.79835	ATP8A1	ATPase phospholipid transporting 8A1
222411_s_at	2e-05	1.35e-07	5.44378	7.19718	0.40936	SSR3	signal sequence receptor subunit 3
216404_at	0.0393	0.00667	2.73826	-2.71706	0.556321	ATXN8OS	ATXN8 opposite strand (non-protein coding)
229867_at	2.03e-05	1.38e-07	-5.43942	7.17692	-0.488785	BTBD9	BTB domain containing 9
227546_x_at	0.000786	2.84e-05	-4.27272	2.21692	-0.601853	AURKAIP1	aurora kinase A interacting protein 1
219366_at	5.19e-06	1.47e-08	5.87842	9.2805	0.509573	AVEN	apoptosis and caspase activation inhibitor
1558445_at	2.07e-05	1.41e-07	-5.43472	7.15506	-0.420958
208260_at	0.0033	0.00021	3.76791	0.382145	0.511274	AVPR1B	arginine vasopressin receptor 1B
1561714_a_at	0.0233	0.00317	-2.98244	-2.06333	-0.548697	B3GALNT2	beta-1,3-N-acetylgalactosaminyltransferase 2
200680_x_at	2.16e-05	1.49e-07	5.42348	7.10284	0.17089	HMGB1	high mobility group box 1
217452_s_at	0.000938	3.67e-05	-4.21092	1.9817	-0.99042	B3GALT2	beta-1,3-galactosyltransferase 2
210121_at	0.00253	0.000144	-3.86601	0.723049	-0.92445	B3GALT2	beta-1,3-galactosyltransferase 2
237338_at	0.00126	5.56e-05	-4.10848	1.59826	-0.61131	B3GNT8	UDP-GlcNAc:betaGal beta-1,3-N-acetylglucosaminyltransferase 8
AFFX-hum_alu_at	2.16e-05	1.51e-07	5.42156	7.09392	0.172018
218349_s_at	2.18e-05	1.52e-07	5.41989	7.08618	0.471592	ZWILCH	zwilch kinetochore protein
1555385_at	0.00371	0.000247	-3.72482	0.234834	-0.500128	B4GALNT1	beta-1,4-N-acetyl-galactosaminyltransferase 1
238312_s_at	0.00709	0.000613	-3.4743	-0.591816	-0.708146	B4GALT3	beta-1,4-galactosyltransferase 3
214437_s_at	2.2e-05	1.55e-07	5.41652	7.07056	0.474312	SHMT2	serine hydroxymethyltransferase 2
208070_s_at	2.2e-05	1.55e-07	-5.41581	7.06723	-0.376842	REV3L	REV3 like, DNA directed polymerase zeta catalytic subunit
206913_at	0.00597	0.000481	-3.54272	-0.371127	-0.690418	BAAT	bile acid-CoA:amino acid N-acyltransferase
230513_at	0.00286	0.000172	3.82098	0.565619	0.576103	BAG6	BCL2 associated athanogene 6
211750_x_at	2.28e-05	1.62e-07	5.40648	7.02402	0.240953	TUBA1C	tubulin alpha 1c
224682_at	2.31e-05	1.65e-07	5.4034	7.00975	0.271686	ANKIB1	ankyrin repeat and IBR domain containing 1
224092_at	0.000298	6.72e-06	4.61012	3.5516	0.518204	BARHL1	BarH like homeobox 1
213491_x_at	2.31e-05	1.66e-07	5.402	7.00328	0.251764	RPN2	ribophorin II
205433_at	0.000444	1.22e-05	-4.47248	2.99692	-1.1512	BCHE	butyrylcholinesterase
212230_at	2.34e-05	1.69e-07	-5.39869	6.98794	-0.494553	PLPP3	phospholipid phosphatase 3
1554869_at	2.35e-05	1.7e-07	5.39716	6.98087	0.298212	WDR37	WD repeat domain 37
232071_at	2.36e-05	1.71e-07	-5.39598	6.97542	-0.421082	MRPL19	mitochondrial ribosomal protein L19
208536_s_at	0.0412	0.00712	2.71581	-2.77456	0.621383	BCL2L11	BCL2 like 11
231948_s_at	2.41e-05	1.75e-07	5.39106	6.9527	0.346633	UBE2F	ubiquitin conjugating enzyme E2 F (putative)
208693_s_at	2.41e-05	1.76e-07	5.39055	6.95032	0.355938	GARS	glycyl-tRNA synthetase
207510_at	0.00411	0.000283	3.68746	0.108314	0.56002	BDKRB1	bradykinin receptor B1
214068_at	0.0227	0.00306	2.99367	-2.03203	0.529454	BEAN1	brain expressed, associated with NEDD4, 1
204569_at	2.48e-05	1.83e-07	-5.38196	6.91065	-0.43535	ICK	intestinal cell (MAK-like) kinase
1553842_at	0.000196	3.7e-06	-4.74432	4.10568	-0.632451	BEND2	BEN domain containing 2
212363_x_at	2.48e-05	1.84e-07	5.38151	6.90857	0.152097	ACTG1///ACTB	actin gamma 1///actin beta
202406_s_at	2.48e-05	1.84e-07	5.38102	6.90634	0.262385	TIAL1	TIA1 cytotoxic granule-associated RNA binding protein-like 1
231175_at	0.00235	0.00013	3.89301	0.818231	0.62839	BEND6	BEN domain containing 6
224367_at	0.00679	0.000579	-3.49035	-0.54041	-0.653908	BEX2	brain expressed X-linked 2
225350_s_at	2.48e-05	1.85e-07	-5.38018	6.90245	-0.28253	ZYG11B	zyg-11 family member B, cell cycle regulator
1554553_s_at	2.48e-05	1.86e-07	5.37938	6.89878	0.373943	YIF1B	Yip1 interacting factor homolog B, membrane trafficking protein
201169_s_at	0.000196	3.69e-06	4.74486	4.10792	0.722945	BHLHE40	basic helix-loop-helix family member e40
1554020_at	0.00303	0.000185	3.80118	0.496919	0.505286	BICD1	BICD cargo adaptor 1
1555826_at	0.00144	6.65e-05	4.06409	1.4346	0.534697	BIRC5	baculoviral IAP repeat containing 5
202095_s_at	0.00253	0.000144	3.86637	0.724313	0.738488	BIRC5	baculoviral IAP repeat containing 5
202094_at	0.00684	0.000584	3.48804	-0.547832	0.702093	BIRC5	baculoviral IAP repeat containing 5
1555947_at	2.57e-05	1.95e-07	-5.36931	6.85233	-0.361543	FAM120A	family with sequence similarity 120A
210334_x_at	0.00731	0.000638	3.46325	-0.627112	0.60963	BIRC5	baculoviral IAP repeat containing 5
205574_x_at	6.12e-05	6.78e-07	5.11163	5.6875	0.742937	BMP1	bone morphogenetic protein 1
207595_s_at	0.000565	1.75e-05	4.38821	2.6642	0.560014	BMP1	bone morphogenetic protein 1
201938_at	2.67e-05	2.05e-07	5.35935	6.8065	0.226218	CDK2AP1	cyclin dependent kinase 2 associated protein 1
221767_x_at	2.67e-05	2.05e-07	5.35884	6.80417	0.322435	HDLBP	high density lipoprotein binding protein
201530_x_at	2.68e-05	2.07e-07	5.35763	6.79859	0.235941	LOC101928634///SENP3-EIF4A1///SNORD10///SNORA48///SNORA67///EIF4A1	uncharacterized LOC101928634///SENP3-EIF4A1 readthrough (NMD candidate)///small nucleolar RNA, C/D box 10///small nucleolar RNA, H/ACA box 48///small nucleolar RNA, H/ACA box 67///eukaryotic translation initiation factor 4A1
205289_at	0.0241	0.00333	-2.96678	-2.1068	-0.533768	BMP2	bone morphogenetic protein 2
205290_s_at	0.0273	0.00399	-2.90904	-2.26528	-0.524116	BMP2	bone morphogenetic protein 2
205430_at	2.72e-06	4.42e-09	-6.10447	10.41	-1.32257	BMP5	bone morphogenetic protein 5
202402_s_at	2.8e-05	2.18e-07	5.34702	6.74984	0.310266	CARS	cysteinyl-tRNA synthetase
220204_s_at	0.00786	0.000703	3.43548	-0.715335	0.649426	BMP8A	bone morphogenetic protein 8a
215110_at	0.0426	0.00745	-2.70014	-2.81443	-0.537712	BMS1P21///MBL1P	BMS1, ribosome biogenesis factor pseudogene 21///mannose binding lectin 1, pseudogene
215076_s_at	2.91e-05	2.28e-07	5.33801	6.70848	0.386238	COL3A1	collagen type III alpha 1 chain
1554101_a_at	2.91e-05	2.28e-07	5.33747	6.70602	0.452172	TMTC4	transmembrane and tetratricopeptide repeat containing 4
206464_at	0.0435	0.00768	-2.68973	-2.84081	-0.688054	BMX	BMX non-receptor tyrosine kinase
204173_at	2.96e-05	2.34e-07	5.33246	6.68304	0.356009	MYL6B	myosin light chain 6B
213183_s_at	2.96e-05	2.34e-07	-5.33236	6.68257	-0.445725
210011_s_at	2.98e-05	2.37e-07	5.33	6.67178	0.257697	EWSR1	EWS RNA binding protein 1
218775_s_at	2.98e-05	2.37e-07	-5.32984	6.67105	-0.472574	WWC2///CLDN22	WW and C2 domain containing 2///claudin 22
201915_at	3e-05	2.38e-07	-5.32848	6.66483	-0.320989	SEC63	SEC63 homolog, protein translocation regulator
220542_s_at	0.0279	0.00411	2.89883	-2.293	1.19874	BPIFA1	BPI fold containing family A member 1
1568768_s_at	0.0276	0.00405	-2.90361	-2.28002	-0.660376	BRE-AS1	BRE antisense RNA 1
214822_at	0.0435	0.00769	-2.68925	-2.84203	-0.511861	BRINP2	BMP/retinoic acid inducible neural specific 2
218296_x_at	3.11e-05	2.5e-07	5.31913	6.62201	0.430228	MSTO2P///MSTO1	misato family member 2, pseudogene///misato 1, mitochondrial distribution and morphology regulator
227255_at	3.12e-05	2.51e-07	-5.3176	6.61502	-0.416893	PDIK1L	PDLIM1 interacting kinase 1 like
207358_x_at	3.13e-05	2.52e-07	-5.31699	6.61226	-0.33921	MACF1	microtubule-actin crosslinking factor 1
200885_at	3.13e-05	2.54e-07	5.31581	6.60687	0.478442	RHOC	ras homolog family member C
1559249_at	3.13e-05	2.54e-07	-5.31556	6.60572	-0.375794	ATXN1	ataxin 1
209971_x_at	3.14e-05	2.55e-07	5.31499	6.6031	0.345423	AIMP2	aminoacyl tRNA synthetase complex interacting multifunctional protein 2
217562_at	0.00828	0.000761	-3.41294	-0.786477	-0.809713	BRINP3	BMP/retinoic acid inducible neural specific 3
218046_s_at	3.17e-05	2.59e-07	5.31136	6.58652	0.3978	MRPS16	mitochondrial ribosomal protein S16
237736_at	0.000572	1.79e-05	4.38274	2.6428	0.70586	BSND	barttin CLCNK type accessory beta subunit
228434_at	0.000882	3.36e-05	-4.23233	2.06286	-0.937828	BTNL9	butyrophilin like 9
210817_s_at	3.2e-05	2.63e-07	-5.30874	6.57456	-0.286909	CALCOCO2	calcium binding and coiled-coil domain 2
202397_at	3.21e-05	2.64e-07	5.30757	6.56923	0.31269	NUTF2P4///NUTF2	nuclear transport factor 2 pseudogene 4///nuclear transport factor 2
222532_at	3.22e-05	2.66e-07	5.30625	6.56318	0.475156	SRPRB	SRP receptor beta subunit
213700_s_at	3.27e-05	2.7e-07	5.30264	6.54671	0.38279	PKM	pyruvate kinase, muscle
229985_at	0.00107	4.45e-05	-4.16363	1.80367	-0.979408	BTNL9	butyrophilin like 9
1553279_at	0.00879	0.000827	-3.38911	-0.861225	-0.518657	BTNL9	butyrophilin like 9
226533_at	3.28e-05	2.73e-07	-5.30044	6.53667	-0.405974	HINT3	histidine triad nucleotide binding protein 3
209642_at	0.00198	0.000103	3.95222	1.02894	0.603502	BUB1	BUB1 mitotic checkpoint serine/threonine kinase
202125_s_at	3.3e-05	2.76e-07	-5.29836	6.52719	-0.368458	TRAK2	trafficking kinesin protein 2
226203_at	3.3e-05	2.77e-07	-5.29811	6.52606	-0.411982	MYO9A	myosin IXA
218060_s_at	3.32e-05	2.79e-07	5.29645	6.51846	0.342544	USB1	U6 snRNA biogenesis phosphodiesterase 1
AFFX-HUMRGE/M10098_M_at	3.32e-05	2.8e-07	5.29548	6.51407	0.206517
215509_s_at	0.00233	0.000129	3.89543	0.82681	0.882266	BUB1	BUB1 mitotic checkpoint serine/threonine kinase
215508_at	0.0153	0.00176	3.16491	-1.54127	0.661532	BUB1	BUB1 mitotic checkpoint serine/threonine kinase
206127_at	3.37e-05	2.85e-07	5.29183	6.49742	0.449518	ELK3	ELK3, ETS transcription factor
208640_at	3.37e-05	2.87e-07	5.29077	6.49261	0.143245	RAC1	ras-related C3 botulinum toxin substrate 1 (rho family, small GTP binding protein Rac1)
217716_s_at	3.37e-05	2.87e-07	5.29075	6.4925	0.303266	SEC61A1	Sec61 translocon alpha 1 subunit
1553205_at	3.37e-05	2.87e-07	-5.2904	6.49091	-0.406968	C20orf166-AS1	C20orf166 antisense RNA 1
203755_at	0.000465	1.31e-05	4.45708	2.93571	0.767058	BUB1B	BUB1 mitotic checkpoint serine/threonine kinase B
1553630_at	0.0119	0.00126	-3.26568	-1.24083	-0.716399	C10orf107	chromosome 10 open reading frame 107
215227_x_at	3.47e-05	2.98e-07	5.28254	6.45514	0.448431	ACP1	acid phosphatase 1, soluble
244077_at	0.0021	0.000112	-3.93201	0.956733	-0.660391	C10orf113	chromosome 10 open reading frame 113
200863_s_at	3.49e-05	3.01e-07	5.28057	6.44618	0.331183	RAB11A	RAB11A, member RAS oncogene family
219601_s_at	0.0315	0.00489	2.84218	-2.44518	0.5161	C10orf12	chromosome 10 open reading frame 12
1553843_at	0.00186	9.41e-05	3.97647	1.11604	0.73178	C10orf67	chromosome 10 open reading frame 67
213503_x_at	3.49e-05	3.03e-07	5.27942	6.44093	0.235253	ANXA2	annexin A2
232456_at	0.00254	0.000145	-3.86535	0.720757	-0.507489	C10orf71	chromosome 10 open reading frame 71
227736_at	0.00446	0.000319	3.65537	0.000553	0.720907	C10orf99	chromosome 10 open reading frame 99
233938_at	0.00706	0.00061	3.476	-0.586393	0.669281	C11orf86	chromosome 11 open reading frame 86
218575_at	3.6e-05	3.15e-07	5.27129	6.40399	0.263957	LOC730268///ANAPC1	anaphase-promoting complex subunit 1-like///anaphase promoting complex subunit 1
213346_at	3.6e-05	3.15e-07	5.27117	6.40346	0.425683	TEX30	testis expressed 30
1568606_at	0.0492	0.00913	-2.62983	-2.99067	-0.790728	C11orf88	chromosome 11 open reading frame 88
228234_at	3.62e-05	3.18e-07	5.26914	6.39425	0.364175	TMED7-TICAM2///TICAM2	TMED7-TICAM2 readthrough///toll like receptor adaptor molecule 2
216497_at	3.66e-05	3.22e-07	-5.2665	6.38225	-0.352634
236840_at	0.0476	0.0087	2.64642	-2.94949	0.713252	C12orf56	chromosome 12 open reading frame 56
1556299_s_at	0.0123	0.00132	3.25213	-1.28173	0.535253	C12orf76	chromosome 12 open reading frame 76
201881_s_at	3.7e-05	3.28e-07	5.26301	6.36643	0.275621	ARIH1	ariadne RBR E3 ubiquitin protein ligase 1
202704_at	3.7e-05	3.29e-07	-5.26228	6.36311	-0.475413	TOB1	transducer of ERBB2, 1
223484_at	0.0031	0.000193	3.79038	0.459554	0.843139	C15orf48	chromosome 15 open reading frame 48
239470_at	0.00474	0.000347	-3.63269	-0.075095	-0.626301	C15orf56	chromosome 15 open reading frame 56
233482_at	0.00274	0.000161	-3.83806	0.625153	-0.711204	C15orf59	chromosome 15 open reading frame 59
202187_s_at	3.73e-05	3.35e-07	-5.25881	6.34736	-0.40456	PPP2R5A	protein phosphatase 2 regulatory subunit B'alpha
1564069_at	3.74e-05	3.36e-07	-5.25795	6.34347	-0.260337	HOTTIP	HOXA distal transcript antisense RNA
204566_at	3.74e-05	3.36e-07	-5.25785	6.34303	-0.258274	PPM1D	protein phosphatase, Mg2+/Mn2+ dependent 1D
227363_s_at	3.77e-05	3.4e-07	5.25552	6.33249	0.322148	EMC8	ER membrane protein complex subunit 8
230074_s_at	6.58e-05	7.73e-07	-5.08396	5.56508	-0.669262	C16orf58	chromosome 16 open reading frame 58
229177_at	0.000396	1.02e-05	-4.51336	3.16019	-1.36492	C16orf89	chromosome 16 open reading frame 89
228066_at	0.0028	0.000167	3.82789	0.589684	0.617086	C17orf96	chromosome 17 open reading frame 96
204161_s_at	3.84e-05	3.49e-07	-5.25008	6.30782	-0.477575	ENPP4	ectonucleotide pyrophosphatase/phosphodiesterase 4 (putative)
217779_s_at	3.89e-05	3.54e-07	-5.24709	6.29429	-0.206934	PNRC2	proline rich nuclear receptor coactivator 2
52164_at	3.9e-05	3.56e-07	5.24596	6.28918	0.369825	C11orf24	chromosome 11 open reading frame 24
216129_at	4.01e-05	3.68e-07	-5.23944	6.25971	-0.464528	ATP9A	ATPase phospholipid transporting 9A (putative)
1553087_at	0.00268	0.000156	-3.84598	0.652822	-0.610437	C18orf12	chromosome 18 open reading frame 12
227295_at	4.03e-05	3.7e-07	5.23829	6.25449	0.388502	IKBIP	IKBKB interacting protein
216111_x_at	4.05e-05	3.72e-07	5.23688	6.24815	0.289487	PMS2P3	PMS1 homolog 2, mismatch repair system component pseudogene 3
219035_s_at	4.07e-05	3.75e-07	5.23529	6.24094	0.258506	RNF34	ring finger protein 34
239431_at	4.08e-05	3.77e-07	5.2344	6.23693	0.491953	TMED7-TICAM2///TICAM2	TMED7-TICAM2 readthrough///toll like receptor adaptor molecule 2
239081_at	4.13e-05	3.82e-07	5.23151	6.22389	0.300402
241842_x_at	0.00695	0.000598	3.48157	-0.56857	0.522879	C19orf45	chromosome 19 open reading frame 45
202122_s_at	4.14e-05	3.85e-07	5.22972	6.21582	0.412176	PLIN3	perilipin 3
219476_at	2.31e-05	1.66e-07	-5.40181	7.00239	-1.17174	C1orf116	chromosome 1 open reading frame 116
228865_at	0.00015	2.51e-06	-4.83012	4.46669	-0.904186	C1orf116	chromosome 1 open reading frame 116
200801_x_at	4.28e-05	4e-07	5.22203	6.1811	0.136148	ACTB	actin beta
219856_at	0.0117	0.00123	-3.27369	-1.21658	-0.720466	C1orf116	chromosome 1 open reading frame 116
238625_at	0.00798	0.00072	-3.42878	-0.736529	-0.912109	C1orf168	chromosome 1 open reading frame 168
212438_at	4.37e-05	4.11e-07	5.21639	6.1557	0.340451	SNRNP27	small nuclear ribonucleoprotein U4/U6.U5 subunit 27
223126_s_at	6.31e-07	3.81e-10	-6.55	12.7227	-0.748412	C1orf21	chromosome 1 open reading frame 21
201123_s_at	4.45e-05	4.2e-07	5.21187	6.13532	0.445188	EIF5A	eukaryotic translation initiation factor 5A
225856_at	4.47e-05	4.23e-07	-5.21025	6.12804	-0.275175	CLOCK	clock circadian regulator
223125_s_at	6.31e-07	3.81e-10	-6.54979	12.7216	-0.625763	C1orf21	chromosome 1 open reading frame 21
222552_at	4.53e-05	4.3e-07	5.20687	6.11282	0.324584	GOLT1B	golgi transport 1B
206559_x_at	4.53e-05	4.31e-07	5.20629	6.11022	0.199279
223480_s_at	4.53e-05	4.32e-07	5.20612	6.10947	0.351764	MRPL47	mitochondrial ribosomal protein L47
235605_at	4.55e-05	4.35e-07	-5.20452	6.10225	-0.416838	CASZ1	castor zinc finger 1
212388_at	4.55e-05	4.37e-07	-5.20369	6.09855	-0.290101	USP24	ubiquitin specific peptidase 24
229409_s_at	4.55e-05	4.37e-07	-5.20364	6.09832	-0.368072
223389_s_at	4.55e-05	4.37e-07	5.20347	6.09755	0.387024	ZNF581	zinc finger protein 581
218288_s_at	4.56e-05	4.4e-07	5.20222	6.09194	0.322421	CCDC90B	coiled-coil domain containing 90B
221272_s_at	2.44e-06	3.26e-09	-6.16128	10.6986	-0.807838	C1orf21	chromosome 1 open reading frame 21
1554246_at	0.000243	5.09e-06	-4.67293	3.80929	-0.68215	C1orf210	chromosome 1 open reading frame 210
216565_x_at	4.59e-05	4.45e-07	5.20001	6.08197	0.457035
213399_x_at	4.59e-05	4.45e-07	5.1996	6.08016	0.238348	RPN2	ribophorin II
223571_at	3.71e-06	7.73e-09	5.99995	9.88396	1.54781	C1QTNF6	C1q and tumor necrosis factor related protein 6
226441_at	4.76e-05	4.63e-07	-5.19145	6.04354	-0.277993	MAP3K2	mitogen-activated protein kinase kinase kinase 2
218516_s_at	4.76e-05	4.65e-07	5.19042	6.03894	0.435699	IMPAD1	inositol monophosphatase domain containing 1
239349_at	2.1e-06	2.51e-09	-6.20899	10.9424	-1.21748	C1QTNF7	C1q and tumor necrosis factor related protein 7
223877_at	0.0006	1.92e-05	-4.36593	2.57715	-0.672173	C1QTNF7	C1q and tumor necrosis factor related protein 7
1554233_at	0.011	0.00114	-3.29546	-1.15041	-0.539505	C1QTNF9B///C1QTNF9	C1q and tumor necrosis factor related protein 9B///C1q and tumor necrosis factor related protein 9
201245_s_at	4.76e-05	4.68e-07	5.18921	6.03351	0.264537	LOC101927673///OTUB1	uncharacterized LOC101927673///OTU deubiquitinase, ubiquitin aldehyde binding 1
1555197_a_at	0.0252	0.00353	2.94784	-2.1591	0.50069	C21orf58	chromosome 21 open reading frame 58
230819_at	0.0108	0.0011	-3.30615	-1.11776	-0.532259	C2CD4C	C2 calcium dependent domain containing 4C
223623_at	0.00178	8.9e-05	-3.99049	1.16661	-1.36213	C2orf40	chromosome 2 open reading frame 40
236984_at	0.0264	0.00379	2.92542	-2.22062	0.653171	C4orf26	chromosome 4 open reading frame 26
208762_at	4.84e-05	4.8e-07	-5.18409	6.01053	-0.298672	SUMO1	small ubiquitin-like modifier 1
205500_at	0.00824	0.000755	-3.41509	-0.779698	-0.797062	C5	complement component 5
222243_s_at	4.89e-05	4.87e-07	-5.18099	5.99662	-0.313126	TOB2	transducer of ERBB2, 2
1554195_a_at	0.00031	7.08e-06	4.59829	3.50336	1.08715	C5orf46	chromosome 5 open reading frame 46
239722_at	0.0271	0.00395	-2.912	-2.25723	-0.591115	C5orf49	chromosome 5 open reading frame 49
221342_at	0.0287	0.00428	2.88606	-2.32754	0.552202	C6orf25	chromosome 6 open reading frame 25
200772_x_at	4.97e-05	4.99e-07	5.1761	5.97475	0.237311	LOC100506248///MIR1244-2///MIR1244-3///MIR1244-1///LOC728026///PTMA	prothymosin alpha///microRNA 1244-2///microRNA 1244-3///microRNA 1244-1///prothymosin alpha-like///prothymosin, alpha
202992_at	0.00101	4.08e-05	-4.18484	1.88333	-1.20155	C7	complement component 7
235979_at	0.0405	0.00696	-2.72348	-2.75498	-0.560678	C7	complement component 7
1557636_a_at	0.000209	4.08e-06	-4.7226	4.01513	-1.07892	C7orf57	chromosome 7 open reading frame 57
202604_x_at	5.08e-05	5.12e-07	5.17038	5.94912	0.407884	ADAM10	ADAM metallopeptidase domain 10
1562301_at	0.00429	0.000302	-3.67052	0.051337	-0.850634	C8orf34	chromosome 8 open reading frame 34
1556421_at	0.00979	0.000966	-3.34397	-1.00151	-0.921229	C8orf34-AS1	C8orf34 antisense RNA 1
229430_at	1.61e-05	8.98e-08	-5.5256	7.58023	-0.83813	C8orf46	chromosome 8 open reading frame 46
200750_s_at	5.24e-05	5.33e-07	5.16224	5.91276	0.324437	RAN	RAN, member RAS oncogene family
235635_at	5.26e-05	5.36e-07	-5.16091	5.90681	-0.426421	ARHGAP5	Rho GTPase activating protein 5
222165_x_at	0.000954	3.76e-05	4.20512	1.95976	0.550495	C9orf16	chromosome 9 open reading frame 16
229012_at	0.0205	0.00264	-3.04073	-1.89964	-1.10955	C9orf24	chromosome 9 open reading frame 24
238579_at	0.0151	0.00173	-3.17075	-1.52409	-0.560213	C9orf85	chromosome 9 open reading frame 85
200928_s_at	5.27e-05	5.42e-07	-5.15863	5.89661	-0.424972	RAB14	RAB14, member RAS oncogene family
220889_s_at	0.000398	1.03e-05	-4.5111	3.15114	-1.48568	CA10	carbonic anhydrase 10
213101_s_at	5.27e-05	5.43e-07	5.15842	5.89571	0.169432	ACTR3	ARP3 actin related protein 3 homolog
210495_x_at	5.31e-05	5.47e-07	5.15653	5.88726	0.194257	FN1	fibronectin 1
231817_at	5.31e-05	5.49e-07	-5.15586	5.88425	-0.381663	USP53	ubiquitin specific peptidase 53
223550_s_at	0.00719	0.000625	-3.46895	-0.608932	-1.21222	CA10	carbonic anhydrase 10
209301_at	0.0111	0.00114	-3.29432	-1.15389	-0.685649	CA2	carbonic anhydrase 2
242787_at	5.31e-05	5.52e-07	5.15493	5.88011	0.415802
200738_s_at	5.42e-05	5.64e-07	5.15024	5.85918	0.282449	PGK1	phosphoglycerate kinase 1
218323_at	5.44e-05	5.67e-07	-5.14922	5.85463	-0.262489	RHOT1	ras homolog family member T1
204865_at	0.000222	4.51e-06	-4.70011	3.92169	-1.25408	CA3	carbonic anhydrase 3
208746_x_at	5.57e-05	5.83e-07	5.14337	5.82854	0.217928	ATP5L	ATP synthase, H+ transporting, mitochondrial Fo complex subunit G
225845_at	5.57e-05	5.84e-07	-5.14308	5.82724	-0.339965	ZBTB44	zinc finger and BTB domain containing 44
203522_at	5.57e-05	5.85e-07	5.1427	5.82558	0.298438	CCS	copper chaperone for superoxide dismutase
228517_at	5.6e-05	5.89e-07	-5.14116	5.81873	-0.420238	MEAF6	MYST/Esa1 associated factor 6
202901_x_at	5.62e-05	5.92e-07	-5.14012	5.81406	-0.45359	CTSS	cathepsin S
225413_at	5.62e-05	5.93e-07	5.13963	5.81191	0.225249	USMG5	up-regulated during skeletal muscle growth 5 homolog (mouse)
200853_at	5.62e-05	5.94e-07	5.13947	5.81117	0.338556	H2AFZ	H2A histone family member Z
206208_at	0.0483	0.00891	-2.63843	-2.96934	-0.620617	CA4	carbonic anhydrase 4
207545_s_at	5.65e-05	5.99e-07	-5.13761	5.80292	-0.319406	LOC101930388///LOC101928143///NUMB	uncharacterized LOC101930388///uncharacterized LOC101928143///NUMB, endocytic adaptor protein
207129_at	0.00571	0.000453	3.55901	-0.318033	0.514161	CA5B	carbonic anhydrase 5B
243173_at	0.0382	0.00639	2.75288	-2.67939	0.534022	CABP7	calcium binding protein 7
225627_s_at	0.000955	3.79e-05	-4.20301	1.95181	-0.758214	CACHD1	cache domain containing 1
218893_at	5.67e-05	6.06e-07	5.13519	5.79213	0.323033	ISOC2	isochorismatase domain containing 2
201590_x_at	5.79e-05	6.2e-07	5.1305	5.77125	0.23282	ANXA2	annexin A2
210108_at	0.000188	3.46e-06	-4.75921	4.16795	-0.844068	CACNA1D	calcium voltage-gated channel subunit alpha1 D
218660_at	5.83e-05	6.26e-07	5.12833	5.76161	0.435031	DYSF	dysferlin
226175_at	5.86e-05	6.3e-07	5.12712	5.75625	0.353652	TTC9C	tetratricopeptide repeat domain 9C
212433_x_at	5.9e-05	6.36e-07	5.12515	5.74747	0.151564	SNORA64///RPS2	small nucleolar RNA, H/ACA box 64///ribosomal protein S2
222569_at	5.9e-05	6.37e-07	5.12469	5.74543	0.324217	UGGT1	UDP-glucose glycoprotein glucosyltransferase 1
243334_at	0.000196	3.72e-06	-4.74292	4.09983	-0.963888	CACNA1D	calcium voltage-gated channel subunit alpha1 D
1555723_at	5.9e-05	6.39e-07	-5.12412	5.74292	-0.47569
1555993_at	0.000198	3.78e-06	-4.73948	4.08544	-0.545308	CACNA1D	calcium voltage-gated channel subunit alpha1 D
235078_at	5.96e-05	6.47e-07	-5.12146	5.7311	-0.410616
207998_s_at	0.0339	0.00541	-2.80833	-2.53478	-0.529586	CACNA1D	calcium voltage-gated channel subunit alpha1 D
216442_x_at	5.96e-05	6.5e-07	5.12059	5.72723	0.184749	FN1	fibronectin 1
223244_s_at	6e-05	6.57e-07	5.1184	5.71752	0.281932	NDUFA12	NADH:ubiquinone oxidoreductase subunit A12
232000_at	6e-05	6.57e-07	-5.11839	5.71748	-0.499238	TTC39B	tetratricopeptide repeat domain 39B
207573_x_at	6e-05	6.58e-07	5.11789	5.71524	0.223792	ATP5L	ATP synthase, H+ transporting, mitochondrial Fo complex subunit G
236013_at	0.00255	0.000147	3.86221	0.709708	0.829237	CACNA1E	calcium voltage-gated channel subunit alpha1 E
204811_s_at	0.00374	0.00025	-3.72114	0.222326	-1.06653	CACNA2D2	calcium voltage-gated channel auxiliary subunit alpha2delta 2
243166_at	6.01e-05	6.62e-07	-5.11669	5.70993	-0.388089	SLC30A5	solute carrier family 30 member 5
207693_at	0.0135	0.00148	-3.21735	-1.38599	-0.918176	CACNB4	calcium voltage-gated channel auxiliary subunit beta 4
213158_at	6.06e-05	6.69e-07	-5.11441	5.6998	-0.478711	ZBTB20	zinc finger and BTB domain containing 20
209032_s_at	0.0287	0.00427	-2.88649	-2.32639	-0.514529	CADM1	cell adhesion molecule 1
201659_s_at	6.12e-05	6.78e-07	5.11159	5.68732	0.367506	ARL1	ADP ribosylation factor like GTPase 1
200092_s_at	6.13e-05	6.81e-07	5.11065	5.68315	0.153094	RPL37	ribosomal protein L37
210427_x_at	6.13e-05	6.82e-07	5.11051	5.68253	0.230319	ANXA2	annexin A2
234996_at	0.000615	1.99e-05	-4.3581	2.54663	-0.619516	CALCRL	calcitonin receptor like receptor
1552402_at	0.028	0.00414	2.89686	-2.29833	0.543067	CALML6	calmodulin like 6
1556121_at	6.18e-05	6.91e-07	-5.10761	5.66966	-0.374638	NAP1L1	nucleosome assembly protein 1 like 1
55093_at	6.18e-05	6.92e-07	5.10746	5.66898	0.398025	CHPF2	chondroitin polymerizing factor 2
230056_at	6.18e-05	6.93e-07	-5.10707	5.66729	-0.406194	BPTF	bromodomain PHD finger transcription factor
200756_x_at	9.75e-07	8.56e-10	6.40501	11.9578	0.648696	CALU	calumenin
214845_s_at	5.9e-05	6.39e-07	5.12423	5.74341	0.517341	CALU	calumenin
200665_s_at	6.22e-05	7.02e-07	5.10433	5.65512	0.306421	SPARC	secreted protein acidic and cysteine rich
205911_at	6.22e-05	7.02e-07	-5.10414	5.65428	-0.397395	PTH1R	parathyroid hormone 1 receptor
201536_at	6.22e-05	7.03e-07	-5.1041	5.65412	-0.283483	DUSP3	dual specificity phosphatase 3
228555_at	6.15e-05	6.86e-07	-5.10921	5.67677	-0.530308	CAMK2D	calcium/calmodulin dependent protein kinase II delta
218622_at	6.25e-05	7.09e-07	5.10232	5.64623	0.304197	NUP37	nucleoporin 37
214737_x_at	6.25e-05	7.1e-07	5.10182	5.64402	0.237958	HNRNPC	heterogeneous nuclear ribonucleoprotein C (C1/C2)
213268_at	0.000243	5.1e-06	-4.67267	3.8082	-0.613557	CAMTA1	calmodulin binding transcription activator 1
208707_at	6.26e-05	7.14e-07	-5.10082	5.63961	-0.47122	EIF5	eukaryotic translation initiation factor 5
228204_at	6.28e-05	7.17e-07	5.09991	5.63555	0.317018	PSMB4	proteasome subunit beta 4
203484_at	6.34e-05	7.24e-07	5.09763	5.62548	0.460339	SEC61G	Sec61 translocon gamma subunit
223354_x_at	6.37e-05	7.3e-07	5.09609	5.61866	0.272345	MFF	mitochondrial fission factor
213221_s_at	6.41e-05	7.35e-07	-5.09456	5.61188	-0.375401	SIK2	salt inducible kinase 2
210541_s_at	6.42e-05	7.39e-07	5.09341	5.60682	0.355499	TRIM27	tripartite motif containing 27
1555370_a_at	0.00064	2.13e-05	-4.34127	2.4812	-0.563946	CAMTA1	calmodulin binding transcription activator 1
221652_s_at	6.42e-05	7.41e-07	5.09296	5.60483	0.367829	ASUN	asunder, spermatogenesis regulator
218715_at	6.42e-05	7.42e-07	5.09259	5.6032	0.279332	UTP6	UTP6, small subunit processome component
218473_s_at	6.42e-05	7.42e-07	5.09249	5.60274	0.288472	COLGALT1	collagen beta(1-O)galactosyltransferase 1
220647_s_at	6.44e-05	7.46e-07	5.09157	5.59867	0.319276	COA4	cytochrome c oxidase assembly factor 4 homolog
227428_at	6.46e-05	7.49e-07	-5.09051	5.594	-0.256122	GABPA	GA binding protein transcription factor alpha subunit
210944_s_at	0.00105	4.36e-05	-4.16892	1.8235	-0.615521	CAPN3	calpain 3
200003_s_at	6.49e-05	7.54e-07	5.08906	5.58758	0.242838	MIR6805///RPL28	microRNA 6805///ribosomal protein L28
205135_s_at	6.53e-05	7.61e-07	5.08729	5.57978	0.29984	NUFIP1	NUFIP1, FMR1 interacting protein 1
203107_x_at	6.54e-05	7.64e-07	5.08645	5.57604	0.151429	SNORA64///RPS2	small nucleolar RNA, H/ACA box 64///ribosomal protein S2
214475_x_at	0.004	0.000274	-3.69647	0.138732	-0.666789	CAPN3	calpain 3
209640_at	6.57e-05	7.69e-07	5.085	5.56965	0.378915	PML	promyelocytic leukemia
229030_at	0.0344	0.00554	-2.80051	-2.55534	-0.535437	CAPN8	calpain 8
232608_x_at	0.0132	0.00144	3.22512	-1.36278	0.592023	CARD14	caspase recruitment domain family member 14
1566135_at	0.0278	0.0041	-2.90025	-2.28914	-0.579832	CARHSP1	calcium regulated heat stable protein 1
240983_s_at	2.46e-06	3.33e-09	6.15706	10.6771	1.18247	CARS	cysteinyl-tRNA synthetase
213347_x_at	6.7e-05	7.91e-07	5.07909	5.54357	0.16781	RPS4X	ribosomal protein S4, X-linked
1559048_at	6.75e-05	7.97e-07	-5.07748	5.53646	-0.402305
224875_at	6.76e-05	8e-07	-5.07669	5.53301	-0.346586	C5orf24	chromosome 5 open reading frame 24
207500_at	0.00122	5.37e-05	4.11728	1.63088	0.500039	CASP5	caspase 5
207317_s_at	0.00378	0.000253	-3.71785	0.21116	-0.993725	CASQ2	calsequestrin 2
210577_at	0.00146	6.79e-05	-4.05863	1.41457	-0.864424	CASR	calcium sensing receptor
240886_at	0.00274	0.000161	-3.83728	0.622419	-0.67155	CASR	calcium sensing receptor
211384_s_at	0.0327	0.00514	-2.82538	-2.48976	-0.59713	CASR	calcium sensing receptor
219544_at	6.93e-05	8.28e-07	5.06945	5.50107	0.457066	BORA	bora, aurora kinase A activator
220888_s_at	0.00281	0.000168	-3.82648	0.584756	-0.621782	CASS4	Cas scaffolding protein family member 4
1556059_s_at	7.02e-05	8.42e-07	-5.06585	5.4852	-0.248095	SPEN	spen family transcriptional repressor
203427_at	7.02e-05	8.42e-07	-5.06581	5.48507	-0.331746	ASF1A	anti-silencing function 1A histone chaperone
202138_x_at	7.12e-05	8.56e-07	5.06244	5.47021	0.3735	AIMP2	aminoacyl tRNA synthetase complex interacting multifunctional protein 2
243386_at	0.000531	1.61e-05	-4.40869	2.74457	-0.620882	CASZ1	castor zinc finger 1
228088_at	7.21e-05	8.69e-07	-5.05915	5.45576	-0.446081	SESTD1	SEC14 and spectrin domain containing 1
208204_s_at	0.00884	0.000835	-3.38638	-0.869753	-0.727446	CAV3	caveolin 3
228751_at	7.25e-05	8.78e-07	-5.057	5.44629	-0.462419	CLK4	CDC like kinase 4
200807_s_at	7.25e-05	8.78e-07	5.05688	5.44576	0.210772	HSPD1	heat shock protein family D (Hsp60) member 1
208348_s_at	0.0093	0.0009	3.3647	-0.937301	0.679672	CBLB	Cbl proto-oncogene B
229641_at	0.00097	3.87e-05	-4.19759	1.93136	-0.947732	CCBE1	collagen and calcium binding EGF domains 1
201608_s_at	7.3e-05	8.89e-07	5.05439	5.43483	0.22499	PWP1	PWP1 homolog, endonuclein
200871_s_at	7.3e-05	8.9e-07	5.05412	5.43364	0.158346	PSAP	prosaposin
242324_x_at	0.00881	0.000829	-3.38832	-0.863673	-0.575435	CCBE1	collagen and calcium binding EGF domains 1
233157_x_at	0.0237	0.00323	-2.97645	-2.07998	-0.613084	CCDC114	coiled-coil domain containing 114
200826_at	7.38e-05	9.06e-07	5.05026	5.41668	0.293476	SNRPD2	small nuclear ribonucleoprotein D2 polypeptide
1566664_at	0.037	0.0061	2.7681	-2.63998	0.508717	CCDC168	coiled-coil domain containing 168
236945_at	0.000242	5.05e-06	-4.67458	3.81611	-0.522603	CCDC171	coiled-coil domain containing 171
236909_at	0.0315	0.00489	-2.84221	-2.4451	-0.809312	CCDC173	coiled-coil domain containing 173
217707_x_at	7.42e-05	9.13e-07	-5.04861	5.40944	-0.34152	SMARCA2	SWI/SNF related, matrix associated, actin dependent regulator of chromatin, subfamily a, member 2
219171_s_at	7.42e-05	9.15e-07	-5.04825	5.40786	-0.386365	ZNF236	zinc finger protein 236
212578_x_at	7.42e-05	9.16e-07	5.04797	5.4066	0.179558	RPS17	ribosomal protein S17
201973_s_at	7.42e-05	9.18e-07	5.04743	5.40426	0.246279	CCZ1B///CCZ1	CCZ1 homolog B, vacuolar protein trafficking and biogenesis associated///CCZ1 homolog, vacuolar protein trafficking and biogenesis associated
237735_at	0.0119	0.00126	3.26496	-1.24301	0.536882	CCDC37-AS1	CCDC37 antisense RNA 1 (head to head)
224859_at	7.42e-05	9.2e-07	5.04692	5.402	0.372991	CD276	CD276 molecule
213011_s_at	7.49e-05	9.3e-07	5.04469	5.39222	0.445854	TPI1	triosephosphate isomerase 1
211945_s_at	7.54e-05	9.38e-07	5.04281	5.38395	0.150221	ITGB1	integrin subunit beta 1
244833_at	0.0196	0.00249	-3.059	-1.84774	-0.571544	CCDC63	coiled-coil domain containing 63
225339_at	7.59e-05	9.47e-07	-5.04081	5.37522	-0.395492	SPAG9	sperm associated antigen 9
36829_at	7.59e-05	9.48e-07	-5.04061	5.37431	-0.497133	MIR6883///PER1	microRNA 6883///period circadian clock 1
213025_at	7.59e-05	9.49e-07	-5.04035	5.37317	-0.275814	THUMPD1	THUMP domain containing 1
202351_at	7.66e-05	9.59e-07	5.03815	5.36354	0.300863	ITGAV	integrin subunit alpha V
220180_at	0.00923	0.000888	-3.36832	-0.926038	-0.516524	CCDC68	coiled-coil domain containing 68
1553214_a_at	0.0028	0.000167	-3.82851	0.591828	-0.525044	CCDC7	coiled-coil domain containing 7
223164_at	7.82e-05	9.85e-07	5.03255	5.339	0.414095	CCM2	CCM2 scaffolding protein
207714_s_at	7.82e-05	9.86e-07	5.03231	5.33796	0.456876	SERPINH1	serpin family H member 1
212747_at	7.92e-05	1e-06	-5.02906	5.32373	-0.29987	ANKS1A	ankyrin repeat and sterile alpha motif domain containing 1A
238759_at	0.0187	0.00233	3.07955	-1.78901	0.57444	CCDC88A	coiled-coil domain containing 88A
205392_s_at	0.00201	0.000105	-3.94821	1.01459	-0.859726	CCL15-CCL14///CCL14	CCL15-CCL14 readthrough (NMD candidate)///C-C motif chemokine ligand 14
227772_at	7.92e-05	1e-06	-5.02831	5.32043	-0.245202	LATS1	large tumor suppressor kinase 1
204053_x_at	7.94e-05	1.01e-06	5.02757	5.3172	0.261317	PTEN	phosphatase and tensin homolog
201523_x_at	8.04e-05	1.02e-06	5.02453	5.30391	0.303015	UBE2N	ubiquitin conjugating enzyme E2 N
217919_s_at	8.07e-05	1.03e-06	5.0231	5.29766	0.430926	MRPL42	mitochondrial ribosomal protein L42
205476_at	0.0132	0.00144	3.22542	-1.3619	1.04145	CCL20	C-C motif chemokine ligand 20
210548_at	0.049	0.00909	-2.63117	-2.98734	-0.707682	CCL23	C-C motif chemokine ligand 23
223710_at	0.0296	0.00446	2.87227	-2.36469	0.600529	CCL26	C-C motif chemokine ligand 26
204264_at	8.11e-05	1.04e-06	-5.02112	5.28899	-0.336459	CPT2	carnitine palmitoyltransferase 2
238750_at	0.0125	0.00135	-3.24539	-1.30199	-0.555862	CCL28	C-C motif chemokine ligand 28
213899_at	8.12e-05	1.04e-06	-5.02045	5.28608	-0.479442	METAP2	methionyl aminopeptidase 2
203418_at	0.000337	8.13e-06	4.56654	3.37444	0.753463	CCNA2	cyclin A2
230779_at	8.21e-05	1.06e-06	-5.01734	5.27247	-0.391274	TNRC6B	trinucleotide repeat containing 6B
203719_at	8.21e-05	1.06e-06	5.0171	5.27143	0.33499	ERCC1	ERCC excision repair 1, endonuclease non-catalytic subunit
230230_at	8.34e-05	1.08e-06	-5.01344	5.25544	-0.432871	PTPN4	protein tyrosine phosphatase, non-receptor type 4
234192_s_at	8.42e-05	1.09e-06	-5.01106	5.24506	-0.451971	GKAP1	G kinase anchoring protein 1
214710_s_at	9.46e-05	1.28e-06	4.97616	5.09314	0.775147	CCNB1	cyclin B1
228729_at	0.00447	0.00032	3.65484	-0.001206	0.568592	CCNB1	cyclin B1
202705_at	0.000405	1.06e-05	4.50518	3.12741	0.84544	CCNB2	cyclin B2
204892_x_at	8.58e-05	1.12e-06	5.00563	5.22136	0.153913	EEF1A1	eukaryotic translation elongation factor 1 alpha 1
1562028_at	0.0229	0.00308	-2.99163	-2.03771	-0.673832	CCND3	cyclin D3
203363_s_at	8.59e-05	1.12e-06	5.0051	5.21903	0.265561	ATG13	autophagy related 13
213523_at	0.00219	0.000117	3.91954	0.9123	0.610541	CCNE1	cyclin E1
218801_at	8.69e-05	1.14e-06	5.00194	5.20527	0.32925	UGGT2	UDP-glucose glycoprotein glucosyltransferase 2
209302_at	8.74e-05	1.14e-06	5.0005	5.199	0.335591	POLR2H	RNA polymerase II subunit H
201077_s_at	8.75e-05	1.15e-06	4.99968	5.1954	0.24612	SNU13///ANXA2	SNU13 homolog, small nuclear ribonucleoprotein (U4/U6.U5)///annexin A2
221589_s_at	8.75e-05	1.15e-06	-4.99957	5.19494	-0.488092	ALDH6A1	aldehyde dehydrogenase 6 family member A1
229900_at	0.00106	4.42e-05	4.16508	1.80911	0.625497	CD109	CD109 molecule
201743_at	0.00368	0.000244	3.72755	0.244139	0.531482	CD14	CD14 molecule
226115_at	8.77e-05	1.16e-06	-4.9981	5.18853	-0.315274	AHCTF1	AT-hook containing transcription factor 1
206749_at	0.032	0.00499	-2.83543	-2.46312	-0.538789	CD1B	CD1b molecule
227853_at	8.81e-05	1.16e-06	4.99674	5.18259	0.291693	PLBD2	phospholipase B domain containing 2
240572_s_at	8.89e-05	1.18e-06	4.9944	5.17244	0.457267	LOC374443	C-type lectin domain family 2 member D pseudogene
205987_at	0.00107	4.47e-05	-4.16241	1.79909	-0.758768	CD1C	CD1c molecule
208651_x_at	0.000277	6.05e-06	-4.63389	3.64877	-0.790008	CD24	CD24 molecule
229043_at	9.03e-05	1.2e-06	-4.99005	5.15348	-0.314848	PAPD5	poly(A) RNA polymerase D5, non-canonical
266_s_at	0.000349	8.58e-06	-4.55414	3.32429	-0.695866	CD24	CD24 molecule
212101_at	9.04e-05	1.21e-06	-4.98931	5.15026	-0.224155	KPNA6	karyopherin subunit alpha 6
208650_s_at	0.00852	0.000791	-3.40191	-0.821123	-0.688406	CD24	CD24 molecule
1559479_at	9.08e-05	1.21e-06	-4.98789	5.14408	-0.360882	SEPSECS-AS1	SEPSECS antisense RNA 1 (head to head)
209933_s_at	0.000201	3.88e-06	4.73355	4.06071	0.507006	CD300A	CD300a molecule
217078_s_at	0.0173	0.00209	3.11262	-1.69378	0.868783	CD300A	CD300a molecule
218193_s_at	9.26e-05	1.24e-06	4.98277	5.12183	0.484288	GOLT1B	golgi transport 1B
210453_x_at	9.26e-05	1.25e-06	4.98229	5.11974	0.213819	ATP5L	ATP synthase, H+ transporting, mitochondrial Fo complex subunit G
1552509_a_at	0.000178	3.21e-06	-4.77569	4.23704	-1.1961	CD300LG	CD300 molecule like family member g
210628_x_at	9.3e-05	1.25e-06	-4.98085	5.1135	-0.285664	LTBP4	latent transforming growth factor beta binding protein 4
207507_s_at	9.4e-05	1.27e-06	4.9783	5.10242	0.329399	ATP5G3	ATP synthase, H+ transporting, mitochondrial Fo complex subunit C3 (subunit 9)
242197_x_at	0.0439	0.00778	-2.68525	-2.85211	-0.557235	CD36	CD36 molecule
228766_at	0.0463	0.0084	-2.65895	-2.91822	-0.613949	CD36	CD36 molecule
225260_s_at	9.46e-05	1.28e-06	4.97604	5.09262	0.25472	MRPL32	mitochondrial ribosomal protein L32
209795_at	0.00267	0.000156	-3.84643	0.654403	-0.656499	CD69	CD69 molecule
204440_at	0.000177	3.15e-06	-4.77995	4.25495	-0.523039	CD83	CD83 molecule
205627_at	0.0206	0.00266	3.03767	-1.9083	1.00774	CDA	cytidine deaminase
242560_at	9.74e-05	1.33e-06	4.96834	5.05919	0.476747	FANCD2	Fanconi anemia complementation group D2
214941_s_at	9.74e-05	1.33e-06	4.96807	5.05804	0.258149	PRPF40A	pre-mRNA processing factor 40 homolog A
205288_at	4.98e-06	1.31e-08	-5.89996	9.3868	-0.566375	CDC14A	cell division cycle 14A
216640_s_at	9.8e-05	1.34e-06	4.96635	5.05059	0.39257	PDIA6	protein disulfide isomerase family A member 6
225924_at	9.84e-05	1.35e-06	-4.96523	5.04572	-0.438097	FNIP2	folliculin interacting protein 2
211348_s_at	0.000829	3.06e-05	-4.25457	2.14754	-0.555911	CDC14B	cell division cycle 14B
202120_x_at	9.84e-05	1.35e-06	4.96449	5.04251	0.370514	AP2S1	adaptor related protein complex 2 sigma 1 subunit
201438_at	9.84e-05	1.35e-06	4.96433	5.04185	0.3728	COL6A3	collagen type VI alpha 3 chain
211161_s_at	9.87e-05	1.36e-06	4.96311	5.03655	0.377587	COL3A1	collagen type III alpha 1 chain
224843_at	9.87e-05	1.36e-06	-4.96296	5.03591	-0.368632	SLAIN2	SLAIN motif family member 2
210101_x_at	9.87e-05	1.36e-06	4.96283	5.03533	0.338501	SH3GLB1	SH3 domain containing GRB2 like endophilin B1
202870_s_at	0.000382	9.73e-06	4.52537	3.20839	0.792687	CDC20	cell division cycle 20
236994_at	9.94e-05	1.38e-06	-4.96066	5.02593	-0.343018	FBXL4	F-box and leucine rich repeat protein 4
218163_at	9.94e-05	1.38e-06	4.96065	5.02589	0.38264	MCTS1	MCTS1, re-initiation and release factor
201622_at	9.94e-05	1.38e-06	4.96028	5.02428	0.236765	SND1	staphylococcal nuclease and tudor domain containing 1
204695_at	0.00794	0.000716	3.43049	-0.731128	0.564649	CDC25A	cell division cycle 25A
201623_s_at	9.98e-05	1.39e-06	4.95886	5.01817	0.234113	DARS	aspartyl-tRNA synthetase
204696_s_at	0.012	0.00128	3.26224	-1.25123	0.540592	CDC25A	cell division cycle 25A
239478_x_at	9.98e-05	1.39e-06	-4.95826	5.01556	-0.3728	GPATCH2L	G-patch domain containing 2 like
218917_s_at	9.98e-05	1.39e-06	-4.95808	5.01479	-0.230405	ARID1A	AT-rich interaction domain 1A
205167_s_at	0.000361	8.97e-06	4.54408	3.28371	0.905419	CDC25C	cell division cycle 25C
204126_s_at	1.18e-05	5.29e-08	5.63041	8.07715	1.68457	CDC45	cell division cycle 45
209023_s_at	0.0001	1.41e-06	-4.95633	5.0072	-0.312141	STAG2	stromal antigen 2
203968_s_at	0.000167	2.92e-06	4.79716	4.32739	0.672132	CDC6	cell division cycle 6
210646_x_at	0.000101	1.42e-06	4.95406	4.99737	0.165671	RPL13AP5///SNORD32A///SNORD33///SNORD34///SNORD35A///RPL13A	ribosomal protein L13a pseudogene 5///small nucleolar RNA, C/D box 32A///small nucleolar RNA, C/D box 33///small nucleolar RNA, C/D box 34///small nucleolar RNA, C/D box 35A///ribosomal protein L13a
221011_s_at	0.000101	1.42e-06	-4.95397	4.99697	-0.485209	LBH	limb bud and heart development
203967_at	0.00119	5.17e-05	4.12676	1.66606	0.905519	CDC6	cell division cycle 6
AFFX-r2-P1-cre-5_at	0.000102	1.43e-06	4.95201	4.98853	0.166913
226661_at	0.00404	0.000277	3.69391	0.130103	0.548077	CDCA2	cell division cycle associated 2
223307_at	0.000182	3.31e-06	4.76938	4.21058	0.769277	CDCA3	cell division cycle associated 3
221520_s_at	0.00306	0.000188	3.79701	0.482483	0.708349	CDCA8	cell division cycle associated 8
207172_s_at	0.00088	3.35e-05	4.23325	2.06635	0.576889	CDH11	cadherin 11
242058_at	0.000105	1.49e-06	-4.94434	4.95535	-0.464902
214126_at	0.000105	1.49e-06	4.94336	4.95115	0.34035
41387_r_at	0.000105	1.49e-06	-4.94329	4.95084	-0.290933	KDM6B	lysine demethylase 6B
206898_at	0.00547	0.000426	-3.57619	-0.261778	-0.738569	CDH19	cadherin 19
214003_x_at	0.000105	1.5e-06	4.94222	4.94619	0.169045	SNORD54///RPS20	small nucleolar RNA, C/D box 54///ribosomal protein S20
203440_at	0.0324	0.00509	2.82858	-2.48129	0.638786	CDH2	cadherin 2
202655_at	0.000105	1.5e-06	4.94168	4.94387	0.37856	MANF	mesencephalic astrocyte derived neurotrophic factor
214690_at	0.000105	1.51e-06	-4.94137	4.94254	-0.324693	TAF1B	TATA-box binding protein associated factor, RNA polymerase I subunit B
203256_at	0.000511	1.51e-05	4.42306	2.80115	0.811622	CDH3	cadherin 3
211252_x_at	0.000106	1.53e-06	-4.93843	4.92986	-0.254689	PTCRA	pre T-cell antigen receptor alpha
217492_s_at	0.000106	1.53e-06	4.93791	4.92762	0.262134	PTENP1///PTEN	phosphatase and tensin homolog pseudogene 1///phosphatase and tensin homolog
221798_x_at	0.000107	1.54e-06	4.93655	4.92174	0.147915
200998_s_at	0.000107	1.55e-06	4.93543	4.91694	0.392726	CKAP4	cytoskeleton associated protein 4
230228_at	0.000107	1.55e-06	-4.93539	4.91676	-0.337344	SSC5D	scavenger receptor cysteine rich family member with 5 domains
205446_s_at	0.000108	1.56e-06	4.93414	4.91136	0.29636	ATF2	activating transcription factor 2
229312_s_at	0.000108	1.56e-06	-4.93379	4.90985	-0.44008	GKAP1	G kinase anchoring protein 1
218506_x_at	0.000108	1.56e-06	-4.93337	4.90802	-0.311111	GLYR1	glyoxylate reductase 1 homolog
208724_s_at	0.000108	1.57e-06	4.93273	4.90526	0.119596	RAB1A	RAB1A, member RAS oncogene family
231582_at	0.0113	0.00117	-3.28777	-1.17383	-0.714592	CDHR3	cadherin related family member 3
235650_at	0.0256	0.00364	-2.93861	-2.18447	-0.743741	CDHR3	cadherin related family member 3
201317_s_at	0.00011	1.6e-06	4.92825	4.88596	0.269532	PSMA2	proteasome subunit alpha 2
222985_at	0.00011	1.6e-06	4.92773	4.88375	0.183816	YWHAG	tyrosine 3-monooxygenase/tryptophan 5-monooxygenase activation protein gamma
203213_at	0.00114	4.88e-05	4.14089	1.71869	0.606953	CDK1	cyclin dependent kinase 1
213476_x_at	0.00011	1.61e-06	4.92635	4.87777	0.457622	TUBB3	tubulin beta 3 class III
237025_at	0.00011	1.62e-06	-4.92554	4.87429	-0.31974
219715_s_at	0.00011	1.62e-06	4.9255	4.87411	0.418655	TDP1	tyrosyl-DNA phosphodiesterase 1
218213_s_at	0.00011	1.62e-06	4.92534	4.87343	0.246915	TMEM258	transmembrane protein 258
215091_s_at	0.00011	1.62e-06	4.925	4.87198	0.278211	GTF3A	general transcription factor IIIA
218057_x_at	0.000112	1.65e-06	4.92167	4.85764	0.291716	EMC8	ER membrane protein complex subunit 8
210559_s_at	0.00115	4.9e-05	4.1397	1.71424	0.584284	CDK1	cyclin dependent kinase 1
203214_x_at	0.00178	8.9e-05	3.99067	1.16727	0.561743	CDK1	cyclin dependent kinase 1
235512_at	0.000303	6.88e-06	-4.60471	3.5295	-0.660321	CDKL1	cyclin dependent kinase like 1
207766_at	0.043	0.00755	-2.69553	-2.82613	-0.630491	CDKL1	cyclin dependent kinase like 1
236331_at	0.000272	5.9e-06	-4.63961	3.67223	-1.05178	CDKL2	cyclin dependent kinase like 2
207073_at	0.0128	0.00138	-3.23907	-1.32099	-0.647082	CDKL2	cyclin dependent kinase like 2
206575_at	0.0339	0.0054	-2.80902	-2.53295	-0.563251	CDKL5	cyclin dependent kinase like 5
209714_s_at	0.000326	7.64e-06	4.58092	3.43276	0.769439	CDKN3	cyclin dependent kinase inhibitor 3
1555758_a_at	0.00155	7.38e-05	4.03796	1.33898	0.744969	CDKN3	cyclin dependent kinase inhibitor 3
224610_at	0.000113	1.69e-06	4.91639	4.83495	0.318035	SNHG1///SNORD22///SNORD25///SNORD26///SNORD27///SNORD28///SNORD30///SNORD31///SNORD29	small nucleolar RNA host gene 1///small nucleolar RNA, C/D box 22///small nucleolar RNA, C/D box 25///small nucleolar RNA, C/D box 26///small nucleolar RNA, C/D box 27///small nucleolar RNA, C/D box 28///small nucleolar RNA, C/D box 30///small nucleolar RNA, C/D box 31///small nucleolar RNA, C/D box 29
204154_at	0.000332	7.95e-06	-4.57171	3.3954	-0.824929	CDO1	cysteine dioxygenase type 1
216605_s_at	0.0129	0.0014	3.23539	-1.33202	0.639973	CEACAM21	carcinoembryonic antigen related cell adhesion molecule 21
214907_at	0.026	0.00372	2.93149	-2.20401	0.555756	CEACAM21	carcinoembryonic antigen related cell adhesion molecule 21
204039_at	0.0037	0.000246	-3.72607	0.239094	-0.572736	CEBPA	CCAAT/enhancer binding protein alpha
223001_at	0.000115	1.72e-06	4.91208	4.81641	0.294901	OSTC	oligosaccharyltransferase complex non-catalytic subunit
208091_s_at	0.000115	1.72e-06	4.91202	4.81618	0.417334	VOPP1	vesicular, overexpressed in cancer, prosurvival protein 1
208158_s_at	0.000115	1.73e-06	-4.91122	4.81271	-0.417208	OSBPL1A	oxysterol binding protein like 1A
213006_at	0.00841	0.000777	-3.40706	-0.80494	-0.609847	CEBPD	CCAAT/enhancer binding protein delta
226032_at	0.000116	1.75e-06	4.90933	4.80461	0.254752	CASP2	caspase 2
203763_at	0.000116	1.76e-06	-4.90795	4.79868	-0.305251	DYNC2LI1	dynein cytoplasmic 2 light intermediate chain 1
223729_at	0.000893	3.42e-05	-4.2283	2.04755	-0.523415	CECR2	CECR2, histone acetyl-lysine reader
235324_at	0.000119	1.8e-06	-4.90283	4.77672	-0.386062	SRSF3	serine and arginine rich splicing factor 3
215287_at	0.000119	1.81e-06	-4.90212	4.77366	-0.397233	STRN	striatin
206138_s_at	0.000121	1.83e-06	-4.89951	4.76248	-0.264623	PI4KB	phosphatidylinositol 4-kinase beta
239752_at	0.00201	0.000106	-3.94653	1.00858	-0.911682	CECR2	CECR2, histone acetyl-lysine reader
212790_x_at	0.000121	1.84e-06	4.89809	4.7564	0.169325	RPL13AP5///SNORD32A///SNORD33///SNORD34///SNORD35A///RPL13A	ribosomal protein L13a pseudogene 5///small nucleolar RNA, C/D box 32A///small nucleolar RNA, C/D box 33///small nucleolar RNA, C/D box 34///small nucleolar RNA, C/D box 35A///ribosomal protein L13a
211936_at	0.000122	1.85e-06	4.89662	4.7501	0.321298	HSPA5	heat shock protein family A (Hsp70) member 5
212942_s_at	0.0393	0.00668	2.73777	-2.71834	0.633755	CEMIP	cell migration inducing hyaluronan binding protein
222009_at	0.0112	0.00116	-3.28974	-1.16783	-0.563009	CEMP1	cementum protein 1
211980_at	0.000123	1.87e-06	4.89422	4.73979	0.314509	COL4A1	collagen type IV alpha 1 chain
205046_at	0.000505	1.48e-05	4.42752	2.81874	0.739006	CENPE	centromere protein E
207828_s_at	0.00035	8.61e-06	4.55349	3.32168	0.775404	CENPF	centromere protein F
207590_s_at	0.00104	4.26e-05	4.1743	1.8437	0.728747	CENPI	centromere protein I
214804_at	0.00161	7.76e-05	4.02518	1.29238	0.543864	CENPI	centromere protein I
218741_at	0.00862	0.000805	3.39678	-0.837198	0.582509	CENPM	centromere protein M
200886_s_at	0.000126	1.93e-06	4.88728	4.71009	0.215374	PGAM1	phosphoglycerate mutase 1
219555_s_at	0.00236	0.000131	3.89086	0.810626	0.536567	CENPN	centromere protein N
211995_x_at	0.000126	1.95e-06	4.88571	4.70336	0.128744	ACTG1///ACTB	actin gamma 1///actin beta
218358_at	0.000127	1.95e-06	4.88491	4.69996	0.361248	CRELD2	cysteine rich with EGF like domains 2
224648_at	0.000127	1.96e-06	-4.88402	4.69614	-0.249459	GPBP1	GC-rich promoter binding protein 1
208954_s_at	0.000127	1.97e-06	-4.88348	4.69384	-0.327493	LARP4B	La ribonucleoprotein domain family member 4B
218883_s_at	0.00102	4.16e-05	4.18009	1.86547	0.619112	CENPU	centromere protein U
204176_at	0.000127	1.98e-06	-4.88257	4.68995	-0.286993	KLHL20	kelch like family member 20
200989_at	0.000128	1.98e-06	4.88173	4.68636	0.194997	HIF1A	hypoxia inducible factor 1 alpha subunit
209091_s_at	0.000128	1.99e-06	4.88144	4.68511	0.340533	SH3GLB1	SH3 domain containing GRB2 like endophilin B1
212677_s_at	0.000128	1.99e-06	-4.88106	4.68348	-0.396754	CEP68	centrosomal protein 68
204373_s_at	0.000128	1.99e-06	-4.88087	4.68268	-0.206155	CEP350	centrosomal protein 350
243299_at	0.000128	1.99e-06	4.8806	4.68154	0.361969
226610_at	0.0166	0.00197	-3.13168	-1.63844	-0.500216	CENPV	centromere protein V
218542_at	0.000674	2.3e-05	4.32373	2.41326	0.821116	CEP55	centrosomal protein 55
208872_s_at	0.00013	2.04e-06	4.87545	4.65953	0.339575	REEP5	receptor accessory protein 5
213738_s_at	0.00013	2.04e-06	4.87521	4.65849	0.144191	ATP5A1	ATP synthase, H+ transporting, mitochondrial F1 complex, alpha subunit 1, cardiac muscle
224794_s_at	0.000975	3.9e-05	4.19623	1.92623	0.522719	CERCAM	cerebral endothelial cell adhesion molecule
243237_at	7.02e-05	8.4e-07	-5.06636	5.48747	-0.855367	CFAP221	cilia and flagella associated protein 221
204459_at	0.00013	2.05e-06	4.87426	4.65445	0.369657	CSTF2	cleavage stimulation factor subunit 2
231043_at	0.0002	3.85e-06	-4.73574	4.06984	-0.830957	CFAP221	cilia and flagella associated protein 221
225063_at	0.000131	2.06e-06	4.87357	4.65152	0.33733	UBL7	ubiquitin like 7
237151_s_at	0.0039	0.000265	-3.70566	0.16983	-0.911464	CFAP221	cilia and flagella associated protein 221
201492_s_at	0.000132	2.08e-06	4.87132	4.64191	0.150182	RPL41	ribosomal protein L41
222789_at	0.000132	2.09e-06	-4.86986	4.63567	-0.236289	RSBN1	round spermatid basic protein 1
220308_at	0.0115	0.0012	-3.28005	-1.19728	-0.560966	CFAP45	cilia and flagella associated protein 45
240453_at	0.0266	0.00383	-2.92222	-2.22935	-0.698853	CFAP61	cilia and flagella associated protein 61
229170_s_at	0.0305	0.00467	-2.85738	-2.40463	-0.53725	CFAP70	cilia and flagella associated protein 70
224210_s_at	0.000134	2.13e-06	-4.86634	4.62067	-0.499107	PXMP4	peroxisomal membrane protein 4
202357_s_at	0.000955	3.79e-05	4.20298	1.95167	0.822362	CFB	complement factor B
230156_x_at	0.000134	2.13e-06	-4.86585	4.61856	-0.401512	LINC01578	long intergenic non-protein coding RNA 1578
232535_at	0.000134	2.14e-06	-4.86467	4.61355	-0.498755	RSBN1L	round spermatid basic protein 1 like
205382_s_at	0.000327	7.71e-06	-4.57875	3.42394	-0.836368	CFD	complement factor D
231785_at	0.018	0.00222	-3.09464	-1.74567	-0.558456	CGB7///NTF4	chorionic gonadotropin beta subunit 7///neurotrophin 4
206932_at	0.000498	1.45e-05	-4.43185	2.83583	-0.901539	CH25H	cholesterol 25-hydroxylase
228560_at	0.0149	0.0017	-3.17636	-1.50754	-0.55097	CHDH	choline dehydrogenase
213911_s_at	0.000135	2.17e-06	4.8617	4.60087	0.227158	H2AFZ	H2A histone family member Z
205393_s_at	0.000112	1.66e-06	4.92043	4.85233	0.703794	CHEK1	checkpoint kinase 1
1556113_at	0.000136	2.18e-06	-4.86086	4.59732	-0.375492	LOC101928841	collagen alpha-1(II) chain-like
205394_at	0.000127	1.97e-06	4.88283	4.69106	0.830133	CHEK1	checkpoint kinase 1
204260_at	0.0212	0.00276	3.02679	-1.93904	0.951839	CHGB	chromogranin B
209396_s_at	0.000579	1.82e-05	4.37856	2.62648	1.12004	CHI3L1	chitinase 3 like 1
209395_at	0.00234	0.00013	3.89435	0.822982	0.966912	CHI3L1	chitinase 3 like 1
204377_s_at	0.000139	2.24e-06	-4.85471	4.57111	-0.405912	DCAF1	DDB1 and CUL4 associated factor 1
235344_at	0.000139	2.25e-06	-4.85455	4.57045	-0.307268	PPM1A	protein phosphatase, Mg2+/Mn2+ dependent 1A
204177_s_at	0.00014	2.26e-06	-4.85275	4.56276	-0.257433	KLHL20	kelch like family member 20
218982_s_at	0.00014	2.27e-06	4.85248	4.56163	0.479675	MRPS17	mitochondrial ribosomal protein S17
223342_at	0.000141	2.28e-06	-4.85103	4.55546	-0.452873	RRM2B	ribonucleotide reductase regulatory TP53 inducible subunit M2B
217485_x_at	0.000141	2.3e-06	4.8491	4.54723	0.256444	PMS2P1	PMS1 homolog 2, mismatch repair system component pseudogene 1
210110_x_at	0.000141	2.3e-06	4.8489	4.54641	0.305201	HNRNPH3	heterogeneous nuclear ribonucleoprotein H3
201004_at	0.000141	2.31e-06	4.84881	4.54602	0.386721	SSR4	signal sequence receptor subunit 4
213060_s_at	0.0311	0.00481	-2.84721	-2.43178	-0.508192	CHI3L2	chitinase 3 like 2
204616_at	0.000142	2.31e-06	4.848	4.54257	0.395768	UCHL3	ubiquitin C-terminal hydrolase L3
225304_s_at	0.000142	2.31e-06	4.84789	4.54211	0.316703	NDUFA11	NADH:ubiquinone oxidoreductase subunit A11
226994_at	0.000142	2.32e-06	-4.84754	4.54061	-0.28456	DNAJA2	DnaJ heat shock protein family (Hsp40) member A2
220630_s_at	0.00735	0.000644	-3.46054	-0.635755	-0.893436	CHIA	chitinase, acidic
242719_at	0.000142	2.34e-06	-4.84594	4.53381	-0.463995	RYBP	RING1 and YY1 binding protein
204591_at	0.04	0.00683	2.73018	-2.73782	0.636462	CHL1	cell adhesion molecule L1 like
236208_at	0.000143	2.35e-06	-4.84495	4.52962	-0.445113	MOCS2	molybdenum cofactor synthesis 2
209763_at	1.62e-05	9.19e-08	-5.52087	7.55798	-1.39289	CHRDL1	chordin like 1
212140_at	0.000143	2.36e-06	-4.84352	4.52354	-0.268045	PDS5A	PDS5 cohesin associated factor A
225787_at	0.000143	2.36e-06	4.84334	4.5228	0.335538	UBE2F	ubiquitin conjugating enzyme E2 F (putative)
201038_s_at	0.000143	2.37e-06	-4.84303	4.52148	-0.287566	ANP32A	acidic nuclear phosphoprotein 32 family member A
206533_at	0.0442	0.00785	2.68216	-2.85991	0.510334	CHRNA5	cholinergic receptor nicotinic alpha 5 subunit
235787_at	0.000145	2.41e-06	-4.83932	4.50572	-0.422607	CDC37L1	cell division cycle 37 like 1
218119_at	0.000146	2.42e-06	4.83836	4.50162	0.260887	TIMM23B///TIMM23	translocase of inner mitochondrial membrane 23 homolog B///translocase of inner mitochondrial membrane 23
221107_at	0.0156	0.0018	3.15831	-1.56065	0.730722	CHRNA9	cholinergic receptor nicotinic alpha 9 subunit
219634_at	0.000297	6.68e-06	4.61129	3.55637	0.568702	CHST11	carbohydrate (chondroitin 4) sulfotransferase 11
32094_at	0.00305	0.000187	3.79843	0.487396	0.581535	CHST3	carbohydrate sulfotransferase 3
223786_at	0.0173	0.00209	3.11297	-1.69276	1.11467	CHST6	carbohydrate sulfotransferase 6
201883_s_at	0.000147	2.46e-06	4.8349	4.48694	0.304401	B4GALT1	beta-1,4-galactosyltransferase 1
212490_at	0.000147	2.46e-06	-4.83465	4.48591	-0.20902	DNAJC8	DnaJ heat shock protein family (Hsp40) member C8
234884_x_at	0.0386	0.00648	2.74772	-2.69271	0.682114	CKAP2///IGLV@///IGLC1	cytoskeleton associated protein 2///immunoglobulin lambda variable cluster///immunoglobulin lambda constant 1
212412_at	0.000148	2.47e-06	4.8336	4.48145	0.357471	PDLIM5	PDZ and LIM domain 5
228722_at	0.000148	2.48e-06	-4.83236	4.47617	-0.325896	PRMT2	protein arginine methyltransferase 2
229610_at	0.00486	0.00036	3.62213	-0.110203	0.652189	CKAP2L	cytoskeleton associated protein 2 like
205149_s_at	0.0141	0.00158	3.19734	-1.4455	0.564593	CLCN4	chloride voltage-gated channel 4
1554748_at	0.00421	0.000295	-3.67674	0.072223	-0.822197	CLCNKB	chloride voltage-gated channel Kb
207047_s_at	0.00451	0.000324	-3.65087	-0.014489	-0.556546	CLCNKB///CLCNKA	chloride voltage-gated channel Kb///chloride voltage-gated channel Ka
205328_at	6.94e-06	2.31e-08	5.79144	8.85418	1.83614	CLDN10	claudin 10
1570291_at	0.0131	0.00143	3.2276	-1.35536	1.0775	CLDN10-AS1	CLDN10 antisense RNA 1
202547_s_at	0.000152	2.56e-06	4.82594	4.44898	0.296828	ARHGEF7	Rho guanine nucleotide exchange factor 7
214135_at	0.000146	2.44e-06	-4.83678	4.49493	-2.09686	CLDN18	claudin 18
221133_s_at	0.000196	3.72e-06	-4.74289	4.0997	-1.74544	CLDN18	claudin 18
227998_at	0.000153	2.58e-06	4.82408	4.44109	0.467246	S100A16	S100 calcium binding protein A16
232578_at	0.000336	8.09e-06	-4.56767	3.37903	-2.03021	CLDN18	claudin 18
200686_s_at	0.000155	2.63e-06	-4.82017	4.42455	-0.244554	SRSF11	serine and arginine rich splicing factor 11
1566956_at	0.000155	2.63e-06	-4.82004	4.42401	-0.239629	OR7E104P	olfactory receptor family 7 subfamily E member 104 pseudogene
207396_s_at	0.000155	2.63e-06	4.81975	4.42277	0.372531	ALG3	ALG3, alpha-1,3- mannosyltransferase
202143_s_at	0.000155	2.64e-06	4.81946	4.42156	0.302823	COPS8	COP9 signalosome subunit 8
221132_at	0.000995	4.02e-05	-4.18868	1.89776	-1.37295	CLDN18	claudin 18
201096_s_at	0.000156	2.66e-06	4.81749	4.41322	0.367359	ARF4	ADP ribosylation factor 4
223426_s_at	0.000157	2.68e-06	-4.81614	4.40753	-0.429843	EPB41L4B	erythrocyte membrane protein band 4.1 like 4B
228707_at	0.00128	5.67e-05	-4.10386	1.58114	-0.554805	CLDN23	claudin 23
203105_s_at	0.000157	2.68e-06	4.81546	4.40462	0.308056	DNM1L	dynamin 1 like
202369_s_at	0.000158	2.7e-06	4.81428	4.39963	0.288528	TRAM2	translocation associated membrane protein 2
228706_s_at	0.00177	8.82e-05	-3.99275	1.17478	-0.53779	CLDN23	claudin 23
228031_at	0.000158	2.72e-06	4.81259	4.39248	0.33774	TTPAL	alpha tocopherol transfer protein like
228704_s_at	0.0335	0.00531	-2.81472	-2.51793	-0.557563	CLDN23	claudin 23
218265_at	0.000161	2.76e-06	-4.80916	4.37802	-0.238606	SECISBP2	SECIS binding protein 2
230022_at	0.0237	0.00325	2.97512	-2.08368	0.553316	CLEC18A///CLEC18C	C-type lectin domain family 18 member A///C-type lectin domain family 18 member C
203066_at	0.000161	2.78e-06	4.8075	4.37101	0.413468	CHST15	carbohydrate (N-acetylgalactosamine 4-sulfate 6-O) sulfotransferase 15
203136_at	0.000161	2.78e-06	4.80731	4.37018	0.374346	RABAC1	Rab acceptor 1
1555214_a_at	0.0385	0.00648	2.7481	-2.69172	0.699914	CLEC7A	C-type lectin domain family 7 member A
219866_at	0.000321	7.45e-06	-4.58663	3.45592	-1.08759	CLIC5	chloride intracellular channel 5
213317_at	0.000327	7.71e-06	-4.57877	3.42403	-1.09815	CLIC5	chloride intracellular channel 5
243917_at	0.029	0.00434	-2.88162	-2.33954	-0.759708	CLIC5	chloride intracellular channel 5
241403_at	0.000373	9.44e-06	-4.53241	3.23671	-0.512886	CLK4	CDC like kinase 4
1552921_a_at	0.000165	2.86e-06	4.8012	4.34442	0.449646	FIGNL1	fidgetin like 1
225087_at	0.000167	2.9e-06	-4.79829	4.33215	-0.229921	FOPNL	FGFR1OP N-terminal like
221653_x_at	0.000167	2.9e-06	4.79805	4.33115	0.393556	APOL2	apolipoprotein L2
1568836_at	0.0305	0.00468	-2.85658	-2.40675	-0.508007	CLK4	CDC like kinase 4
207127_s_at	0.000168	2.92e-06	4.79658	4.32492	0.224413	HNRNPH3	heterogeneous nuclear ribonucleoprotein H3
222043_at	0.00118	5.1e-05	-4.13017	1.67874	-0.865266	CLU	clusterin
238910_at	1.62e-05	9.11e-08	-5.52261	7.56616	-0.940663	CLUHP3	clustered mitochondria homolog pseudogene 3
219442_at	0.00104	4.27e-05	-4.17407	1.84284	-0.542466	CLUHP3	clustered mitochondria homolog pseudogene 3
226380_at	0.00017	2.98e-06	-4.79237	4.3072	-0.498575	PTPN21	protein tyrosine phosphatase, non-receptor type 21
235920_at	2.91e-06	5.47e-09	-6.06469	10.209	-0.819655	CLUHP3///ZNF720	clustered mitochondria homolog pseudogene 3///zinc finger protein 720
200716_x_at	0.000171	3e-06	4.79072	4.30025	0.181699	RPL13AP5///SNORD32A///SNORD33///SNORD34///SNORD35A///RPL13A	ribosomal protein L13a pseudogene 5///small nucleolar RNA, C/D box 32A///small nucleolar RNA, C/D box 33///small nucleolar RNA, C/D box 34///small nucleolar RNA, C/D box 35A///ribosomal protein L13a
1566176_at	0.0129	0.0014	-3.23506	-1.33303	-0.51228	CLYBL-AS1	CLYBL antisense RNA 1
211099_s_at	0.00539	0.000418	-3.5814	-0.244667	-0.570544	CNGB1	cyclic nucleotide gated channel beta 1
229116_at	2.69e-06	4.3e-09	-6.10951	10.4355	-1.02687	CNKSR2	connector enhancer of kinase suppressor of Ras 2
205126_at	0.000173	3.05e-06	4.78755	4.28691	0.364894	VRK2	vaccinia related kinase 2
202175_at	0.000173	3.05e-06	4.78741	4.28634	0.279548	CHPF	chondroitin polymerizing factor
229454_at	0.000174	3.08e-06	-4.78524	4.2772	-0.378446	BCLAF1	BCL2 associated transcription factor 1
209081_s_at	0.000174	3.08e-06	4.78487	4.27564	0.498901	COL18A1	collagen type XVIII alpha 1 chain
206731_at	0.00582	0.000465	-3.5519	-0.341235	-0.521468	CNKSR2	connector enhancer of kinase suppressor of Ras 2
231851_at	0.000174	3.09e-06	-4.78467	4.27481	-0.442288	RAVER2	ribonucleoprotein, PTB binding 2
1557170_at	0.000174	3.09e-06	-4.78454	4.27424	-0.381772	NEK8	NIMA related kinase 8
1553267_a_at	0.0438	0.00776	2.68641	-2.84919	0.587532	CNOT6L	CCR4-NOT transcription complex subunit 6 like
228759_at	0.000176	3.12e-06	4.78217	4.26428	0.387679	CREB3L2	cAMP responsive element binding protein 3 like 2
236684_at	0.0386	0.0065	2.74665	-2.69547	0.565717	CNOT9	CCR4-NOT transcription complex subunit 9
218472_s_at	0.000176	3.14e-06	4.78086	4.25877	0.313506	PELO	pelota homolog (Drosophila)
231463_at	0.0216	0.00284	-3.01717	-1.96617	-0.631742	CNTD1	cyclin N-terminal domain containing 1
227209_at	0.00246	0.000139	-3.8756	0.756818	-0.970742	CNTN1	contactin 1
225783_at	0.000177	3.15e-06	4.77988	4.25465	0.307909	UBE2F	ubiquitin conjugating enzyme E2 F (putative)
227202_at	0.0104	0.00104	-3.32172	-1.07007	-0.848594	CNTN1	contactin 1
1554306_at	0.000177	3.17e-06	-4.77901	4.251	-0.409023	ITPKB	inositol-trisphosphate 3-kinase B
212071_s_at	0.000177	3.17e-06	-4.77883	4.25024	-0.384564	SPTBN1	spectrin beta, non-erythrocytic 1
1566541_at	0.000177	3.17e-06	-4.77873	4.24982	-0.424934
218052_s_at	0.000177	3.17e-06	4.7787	4.24969	0.227526	ATP13A1	ATPase 13A1
229084_at	0.000278	6.12e-06	-4.63134	3.63833	-0.555342	CNTN4	contactin 4
217784_at	0.000178	3.19e-06	4.77717	4.24326	0.448554	YKT6	YKT6 v-SNARE homolog (S. cerevisiae)
228053_s_at	0.000178	3.2e-06	4.77688	4.24205	0.363938	TOMM5	translocase of outer mitochondrial membrane 5
242109_at	0.000178	3.2e-06	-4.77637	4.2399	-0.460751
239490_at	6e-05	6.58e-07	5.11783	5.71499	0.678	COA1	cytochrome c oxidase assembly factor 1 homolog
217756_x_at	0.000178	3.22e-06	4.77531	4.23544	0.250086	MIR1282///HYPK///SERF2	microRNA 1282///huntingtin interacting protein K///small EDRK-rich factor 2
229598_at	0.000187	3.44e-06	-4.76079	4.17457	-0.67224	COBLL1	cordon-bleu WH2 repeat protein like 1
231896_s_at	0.000178	3.23e-06	4.77464	4.23266	0.228284	DENR	density regulated re-initiation and release factor
215712_s_at	0.000179	3.23e-06	-4.77434	4.23139	-0.477748	IGFALS	insulin like growth factor binding protein acid labile subunit
200839_s_at	0.000179	3.24e-06	4.77409	4.23032	0.270136	CTSB	cathepsin B
204320_at	1.05e-05	4.45e-08	5.66432	8.23945	2.3826	COL11A1	collagen type XI alpha 1 chain
37892_at	1.51e-05	8.12e-08	5.54552	7.67412	2.46573	COL11A1	collagen type XI alpha 1 chain
229271_x_at	0.000112	1.66e-06	4.92062	4.85313	2.21051	COL11A1	collagen type XI alpha 1 chain
200639_s_at	0.000182	3.32e-06	4.76836	4.20629	0.194999	YWHAZ	tyrosine 3-monooxygenase/tryptophan 5-monooxygenase activation protein zeta
239143_x_at	0.000184	3.35e-06	-4.76667	4.1992	-0.347662	RNF138	ring finger protein 138
226752_at	0.000184	3.36e-06	-4.76579	4.19551	-0.384754	FAM174A	family with sequence similarity 174 member A
201029_s_at	0.000186	3.39e-06	4.76403	4.18814	0.379702	CD99	CD99 molecule
223436_s_at	0.000186	3.39e-06	4.76378	4.1871	0.284521	TRPT1	tRNA phosphotransferase 1
235556_at	0.000186	3.4e-06	-4.7631	4.18424	-0.384297	CREBRF	CREB3 regulatory factor
229666_s_at	0.000187	3.43e-06	4.7612	4.17628	0.318778	CSTF3	cleavage stimulation factor subunit 3
231766_s_at	0.000176	3.13e-06	4.78136	4.26087	1.00601	COL12A1	collagen type XII alpha 1 chain
244008_at	0.000188	3.45e-06	-4.75987	4.1707	-0.414357	PARP8	poly(ADP-ribose) polymerase family member 8
216525_x_at	0.000188	3.45e-06	4.75976	4.17024	0.274171	PMS2P3	PMS1 homolog 2, mismatch repair system component pseudogene 3
231879_at	0.000486	1.39e-05	4.44244	2.87769	0.753744	COL12A1	collagen type XII alpha 1 chain
225664_at	0.000793	2.88e-05	4.26987	2.20602	0.837692	COL12A1	collagen type XII alpha 1 chain
228750_at	0.0358	0.00584	-2.78323	-2.60058	-0.656286	COL14A1	collagen type XIV alpha 1 chain
202310_s_at	2.4e-06	3.04e-09	6.17395	10.7632	1.18403	COL1A1	collagen type I alpha 1 chain
202311_s_at	2.16e-05	1.5e-07	5.42291	7.10016	1.04562	COL1A1	collagen type I alpha 1 chain
243552_at	0.000189	3.5e-06	-4.75674	4.15758	-0.346923	MBTD1	mbt domain containing 1
200999_s_at	0.00019	3.51e-06	4.75634	4.15592	0.346626	CKAP4	cytoskeleton associated protein 4
202404_s_at	5.82e-07	3.16e-10	6.58299	12.8983	0.571464	COL1A2	collagen type I alpha 2 chain
229218_at	0.00204	0.000107	3.94251	0.99422	0.593692	COL1A2	collagen type I alpha 2 chain
208096_s_at	0.0207	0.00268	-3.03615	-1.91261	-0.578393	COL21A1	collagen type XXI alpha 1 chain
239921_at	0.00727	0.000634	-3.46515	-0.621059	-0.703303	COL28A1	collagen type XXVIII alpha 1 chain
215077_at	4.82e-06	1.2e-08	5.91688	9.47051	1.07766	COL3A1	collagen type III alpha 1 chain
203467_at	0.000191	3.55e-06	-4.7536	4.14447	-0.493321	PMM1	phosphomannomutase 1
209186_at	0.000192	3.58e-06	4.75155	4.13589	0.354264	ATP2A2	ATPase sarcoplasmic/endoplasmic reticulum Ca2+ transporting 2
201852_x_at	1.38e-05	6.91e-08	5.57757	7.82575	0.682277	COL3A1	collagen type III alpha 1 chain
223086_x_at	0.000193	3.6e-06	4.7507	4.13232	0.23899	MRPL51	mitochondrial ribosomal protein L51
232458_at	0.000247	5.21e-06	4.66781	3.78818	0.914519	COL3A1	collagen type III alpha 1 chain
211981_at	0.000207	4.01e-06	4.72624	4.03026	0.504871	COL4A1	collagen type IV alpha 1 chain
211966_at	0.000537	1.63e-05	4.40537	2.73155	0.549698	COL4A2	collagen type IV alpha 2 chain
214641_at	0.00134	6.03e-05	-4.08827	1.52356	-0.76979	COL4A3	collagen type IV alpha 3 chain
222073_at	0.00168	8.19e-05	-4.0115	1.2427	-0.894349	COL4A3	collagen type IV alpha 3 chain
226267_at	0.000195	3.67e-06	-4.74634	4.11411	-0.39648	JDP2	Jun dimerization protein 2
227930_at	0.000196	3.67e-06	-4.746	4.11269	-0.296062	AGO4	argonaute 4, RISC catalytic component
214602_at	0.0162	0.00191	-3.14102	-1.61122	-0.605448	COL4A4	collagen type IV alpha 4 chain
210945_at	0.0455	0.0082	-2.66709	-2.89782	-0.528526	COL4A6	collagen type IV alpha 6 chain
212488_at	9.03e-05	1.2e-06	4.98989	5.15282	0.732631	COL5A1	collagen type V alpha 1 chain
202189_x_at	0.000196	3.69e-06	4.74468	4.10719	0.228664	MIR4745///PTBP1	microRNA 4745///polypyrimidine tract binding protein 1
212489_at	0.000273	5.93e-06	4.63855	3.66787	0.718674	COL5A1	collagen type V alpha 1 chain
231111_at	0.000196	3.7e-06	-4.7441	4.10476	-0.389114	SCYL3	SCY1 like pseudokinase 3
237398_at	0.000196	3.72e-06	-4.74332	4.10148	-0.470688
203325_s_at	0.000681	2.34e-05	4.31961	2.39731	0.573544	COL5A1	collagen type V alpha 1 chain
221730_at	9.95e-06	4.02e-08	5.68395	8.33369	0.938065	COL5A2	collagen type V alpha 2 chain
221729_at	1.65e-05	9.65e-08	5.51122	7.5126	0.734572	COL5A2	collagen type V alpha 2 chain
218975_at	0.023	0.00311	2.98845	-2.04657	0.53636	COL5A3	collagen type V alpha 3 chain
204732_s_at	0.000196	3.73e-06	-4.74271	4.09895	-0.325014	TRIM23	tripartite motif containing 23
213583_x_at	0.000198	3.77e-06	4.74012	4.08811	0.15408	EEF1A1	eukaryotic translation elongation factor 1 alpha 1
209156_s_at	0.0014	6.38e-05	4.07421	1.47177	0.605665	COL6A2	collagen type VI alpha 2 chain
238076_at	0.000198	3.78e-06	-4.73986	4.08705	-0.475593	GATAD2B	GATA zinc finger domain containing 2B
1553835_a_at	0.0028	0.000167	-3.82853	0.591921	-0.745776	COL6A5	collagen type VI alpha 5 chain
228772_at	0.000198	3.78e-06	-4.73941	4.08515	-0.447401	HNMT	histamine N-methyltransferase
1553834_at	0.0105	0.00106	-3.31613	-1.08721	-0.636156	COL6A5	collagen type VI alpha 5 chain
220078_at	0.000198	3.78e-06	-4.73938	4.08505	-0.306859	USP48	ubiquitin specific peptidase 48
230867_at	0.000612	1.97e-05	-4.36	2.55405	-1.19207	COL6A6	collagen type VI alpha 6 chain
212483_at	0.0002	3.83e-06	-4.73671	4.07389	-0.316565	NIPBL	NIPBL, cohesin loading factor
242641_at	0.0109	0.00111	-3.3024	-1.12924	-0.725011	COL6A6	collagen type VI alpha 6 chain
203827_at	0.000201	3.85e-06	4.73526	4.06784	0.372834	WIPI1	WD repeat domain, phosphoinositide interacting 1
217312_s_at	0.00106	4.42e-05	4.16534	1.81008	0.706573	COL7A1	collagen type VII alpha 1 chain
230956_at	0.0194	0.00244	-3.0645	-1.83207	-0.688768	COLCA1	colorectal cancer associated 1
217877_s_at	0.000201	3.88e-06	-4.73403	4.06272	-0.230739	GPBP1L1	GC-rich promoter binding protein 1 like 1
208754_s_at	0.000201	3.88e-06	-4.73394	4.06236	-0.277101	NAP1L1	nucleosome assembly protein 1 like 1
221019_s_at	0.00132	5.9e-05	-4.09373	1.54367	-0.581123	COLEC12	collectin subfamily member 12
201264_at	1.51e-05	8.19e-08	5.54373	7.6657	0.511101	COPE	coatomer protein complex subunit epsilon
239392_s_at	0.000204	3.95e-06	-4.72992	4.04561	-0.374488	POGK	pogo transposable element with KRAB domain
201778_s_at	0.000207	4.01e-06	-4.72655	4.03155	-0.240446	EFCAB14	EF-hand calcium binding domain 14
239260_at	0.0336	0.00534	2.81276	-2.5231	0.57391	CORIN	corin, serine peptidase
239261_s_at	0.048	0.00881	2.6421	-2.96023	0.733843	CORIN	corin, serine peptidase
226268_at	0.000208	4.03e-06	-4.72536	4.02661	-0.377012	RAB21	RAB21, member RAS oncogene family
211487_x_at	0.000208	4.04e-06	4.72462	4.02352	0.19326	RPS17	ribosomal protein S17
227721_at	0.000622	2.03e-05	-4.35345	2.52855	-0.743387	CPAMD8	C3 and PZP like, alpha-2-macroglobulin domain containing 8
206651_s_at	0.000247	5.21e-06	-4.66781	3.78816	-2.01922	CPB2	carboxypeptidase B2
227947_at	0.000208	4.06e-06	-4.72375	4.01992	-0.364532	PHACTR2	phosphatase and actin regulator 2
217140_s_at	0.000209	4.08e-06	4.72269	4.01549	0.406849	VDAC1	voltage dependent anion channel 1
201940_at	3.33e-05	2.81e-07	5.29483	6.51108	0.63904	CPD	carboxypeptidase D
202407_s_at	0.000209	4.08e-06	4.72233	4.01401	0.351334	PRPF31	pre-mRNA processing factor 31
201941_at	0.00011	1.6e-06	4.92845	4.88685	0.556644	CPD	carboxypeptidase D
201943_s_at	0.000143	2.35e-06	4.84463	4.52824	0.70001	CPD	carboxypeptidase D
201942_s_at	0.000517	1.54e-05	4.41896	2.78499	0.651356	CPD	carboxypeptidase D
209485_s_at	0.00021	4.12e-06	-4.72012	4.00477	-0.412265	OSBPL1A	oxysterol binding protein like 1A
201116_s_at	0.000712	2.49e-05	4.30479	2.3401	0.661908	CPE	carboxypeptidase E
1556499_s_at	0.000211	4.14e-06	4.71941	4.00183	0.289955	COL1A1	collagen type I alpha 1 chain
203328_x_at	0.000212	4.16e-06	4.71806	3.99622	0.263196	IDE	insulin degrading enzyme
227037_at	0.000212	4.16e-06	-4.71804	3.99614	-0.343371	PLD6///FLCN	phospholipase D family member 6///folliculin
228728_at	0.000367	9.23e-06	-4.53744	3.25694	-0.508177	CPED1	cadherin like and PC-esterase domain containing 1
200838_at	0.000213	4.2e-06	4.71595	3.98747	0.406747	CTSB	cathepsin B
243403_x_at	0.000209	4.09e-06	-4.7222	4.01344	-0.812111	CPM	carboxypeptidase M
213274_s_at	0.000214	4.23e-06	4.71441	3.98106	0.470745	CTSB	cathepsin B
235019_at	0.000323	7.52e-06	-4.58441	3.4469	-0.849141	CPM	carboxypeptidase M
235706_at	0.000955	3.79e-05	-4.20312	1.95221	-0.759474	CPM	carboxypeptidase M
201180_s_at	0.000214	4.24e-06	4.71402	3.97942	0.238135	GNAI3	G protein subunit alpha i3
228545_at	0.000214	4.25e-06	-4.71339	3.97679	-0.261873	ZNF148	zinc finger protein 148
205930_at	0.000214	4.25e-06	4.71337	3.97672	0.248511	GTF2E1	general transcription factor IIE subunit 1
241765_at	0.00166	8.11e-05	-4.01424	1.25262	-0.721829	CPM	carboxypeptidase M
206100_at	0.00266	0.000154	-3.84858	0.661923	-0.715147	CPM	carboxypeptidase M
225338_at	0.000217	4.31e-06	-4.71037	3.96426	-0.243534	ZYG11B	zyg-11 family member B, cell cycle regulator
227860_at	0.000386	9.89e-06	4.52157	3.19314	1.07449	CPXM1	carboxypeptidase X, M14 family member 1
231489_x_at	0.0279	0.0041	2.89951	-2.29116	0.728127	CREG2	cellular repressor of E1A stimulated genes 2
203746_s_at	0.000217	4.32e-06	4.7097	3.96149	0.360712	HCCS	holocytochrome c synthase
229521_at	0.000217	4.34e-06	4.70891	3.9582	0.45736	CCDC71L	coiled-coil domain containing 71-like
223475_at	0.042	0.00731	-2.70679	-2.79754	-0.510662	CRISPLD1	cysteine rich secretory protein LCCL domain containing 1
1569206_at	0.000218	4.36e-06	-4.70793	3.95412	-0.430473	TCP11L2	t-complex 11 like 2
207223_s_at	0.000219	4.39e-06	4.70602	3.94622	0.374699	PTBP3	polypyrimidine tract binding protein 3
210199_at	0.0254	0.00358	2.94413	-2.16932	0.530079	CRYAA	crystallin alpha A
202124_s_at	0.00022	4.42e-06	-4.70489	3.94154	-0.292964	TRAK2	trafficking kinesin protein 2
238493_at	0.000221	4.43e-06	-4.70417	3.93853	-0.366468	ZNF506	zinc finger protein 506
209694_at	0.000221	4.44e-06	4.70368	3.9365	0.322895	PTS	6-pyruvoyltetrahydropterin synthase
205489_at	0.0355	0.00577	-2.7871	-2.59047	-0.655251	CRYM	crystallin mu
1557143_at	0.00248	0.00014	3.87352	0.749494	0.540483	CSMD2	CUB and Sushi multiple domains 2
225557_at	0.00312	0.000194	-3.78816	0.451886	-0.51049	CSRNP1	cysteine and serine rich nuclear protein 1
219155_at	0.000221	4.46e-06	4.70242	3.93127	0.468582	PITPNC1	phosphatidylinositol transfer protein, cytoplasmic 1
1560296_at	0.000221	4.47e-06	-4.70237	3.93107	-0.463514
206224_at	0.048	0.00881	2.64217	-2.96004	0.737815	CST1	cystatin SN
202959_at	0.000222	4.48e-06	-4.70139	3.92699	-0.310672	MUT	methylmalonyl-CoA mutase
200830_at	0.000222	4.5e-06	4.70071	3.92419	0.220713	PSMD2	proteasome 26S subunit, non-ATPase 2
232510_s_at	0.000222	4.51e-06	4.70031	3.92252	0.309856	DPP3	dipeptidyl peptidase 3
206994_at	0.0349	0.00564	2.79485	-2.57019	0.520598	CST4	cystatin S
218246_at	0.000223	4.53e-06	-4.69937	3.91863	-0.238428	MUL1	mitochondrial E3 ubiquitin protein ligase 1
225681_at	5.65e-05	6e-07	5.13724	5.80126	0.816805	CTHRC1	collagen triple helix repeat containing 1
210074_at	0.000193	3.62e-06	4.74926	4.12632	0.811874	CTSV	cathepsin V
235112_at	0.000225	4.59e-06	-4.69641	3.90634	-0.494541	KIAA1958	KIAA1958
1560910_at	0.000226	4.6e-06	-4.69569	3.90337	-0.428229	PPIL6	peptidylprolyl isomerase like 6
201372_s_at	0.000142	2.33e-06	-4.8463	4.53535	-0.625342	CUL3	cullin 3
201274_at	0.000226	4.61e-06	4.69519	3.90132	0.343443	PSMA5	proteasome subunit alpha 5
204470_at	0.0331	0.00524	2.81909	-2.5064	0.638724	CXCL1	C-X-C motif chemokine ligand 1
201068_s_at	0.000227	4.65e-06	4.69335	3.89369	0.265484	PSMC2	proteasome 26S subunit, ATPase 2
226960_at	0.0442	0.00785	-2.68211	-2.86005	-0.570578	CXCL17	C-X-C motif chemokine ligand 17
205895_s_at	0.000227	4.66e-06	4.69279	3.89139	0.372339	NOLC1	nucleolar and coiled-body phosphoprotein 1
213032_at	0.000228	4.68e-06	-4.69179	3.88723	-0.485318	NFIB	nuclear factor I B
213375_s_at	0.000228	4.69e-06	-4.69153	3.88616	-0.366258	N4BP2L1	NEDD4 binding protein 2 like 1
236060_at	0.000229	4.7e-06	-4.69092	3.88365	-0.399883	METTL14	methyltransferase like 14
202859_x_at	0.00426	0.000299	3.67271	0.058692	0.825837	CXCL8	C-X-C motif chemokine ligand 8
211506_s_at	0.0256	0.00364	2.93851	-2.18475	0.713663	CXCL8	C-X-C motif chemokine ligand 8
241741_at	0.00023	4.73e-06	-4.68938	3.87728	-0.490897	CRLS1	cardiolipin synthase 1
241443_at	0.000232	4.78e-06	-4.68716	3.86807	-0.4236	ADI1	acireductone dioxygenase 1
225026_at	0.000232	4.78e-06	-4.68695	3.86722	-0.351131	CHD6	chromodomain helicase DNA binding protein 6
203028_s_at	0.00013	2.05e-06	4.87459	4.65586	0.595824	CYBA	cytochrome b-245 alpha chain
222594_s_at	0.000232	4.79e-06	4.68648	3.86524	0.322595	SPATS2	spermatogenesis associated serine rich 2
202436_s_at	0.00283	0.00017	3.82366	0.574957	0.602806	CYP1B1	cytochrome P450 family 1 subfamily B member 1
224514_x_at	0.000233	4.83e-06	-4.6848	3.85832	-0.226469	IL17RC	interleukin 17 receptor C
202435_s_at	0.00444	0.000317	3.65746	0.007555	0.574323	CYP1B1	cytochrome P450 family 1 subfamily B member 1
235360_at	0.000234	4.85e-06	-4.68366	3.85359	-0.292122	PLEKHM3	pleckstrin homology domain containing M3
206504_at	0.000861	3.25e-05	4.24012	2.09249	1.42986	CYP24A1	cytochrome P450 family 24 subfamily A member 1
214335_at	0.000235	4.88e-06	4.68241	3.84842	0.394894	RPL18	ribosomal protein L18
226721_at	0.000235	4.88e-06	-4.68232	3.84807	-0.303641	DPY19L4	dpy-19 like 4 (C. elegans)
217133_x_at	0.000332	7.96e-06	-4.57146	3.39438	-0.552984	CYP2B6	cytochrome P450 family 2 subfamily B member 6
222593_s_at	0.000241	5.01e-06	4.67634	3.82337	0.313056	SPATS2	spermatogenesis associated serine rich 2
202244_at	0.000241	5.01e-06	4.67631	3.82322	0.188811	PSMB4	proteasome subunit beta 4
204768_s_at	0.000241	5.02e-06	4.67607	3.82226	0.470378	FEN1	flap structure-specific endonuclease 1
206755_at	0.000571	1.79e-05	-4.38324	2.64475	-0.653568	CYP2B6	cytochrome P450 family 2 subfamily B member 6
221257_x_at	0.000242	5.06e-06	-4.6742	3.81453	-0.313675	FBXO38	F-box protein 38
210272_at	1.48e-05	7.89e-08	-5.55118	7.70087	-1.56939	CYP2B7P	cytochrome P450 family 2 subfamily B member 7, pseudogene
206754_s_at	5.64e-05	5.98e-07	-5.13812	5.80515	-1.473	CYP2B7P///CYP2B6	cytochrome P450 family 2 subfamily B member 7, pseudogene///cytochrome P450 family 2 subfamily B member 6
205939_at	0.00819	0.000748	-3.41797	-0.770625	-0.730082	CYP3A7-CYP3A51P///CYP3A7	CYP3A7-CYP3A51P readthrough///cytochrome P450 family 3 subfamily A member 7
210096_at	8.76e-06	3.33e-08	-5.72049	8.50981	-2.11386	CYP4B1	cytochrome P450 family 4 subfamily B member 1
208825_x_at	0.000244	5.11e-06	4.67191	3.80508	0.143873	SNORD42A///RPL23A	small nucleolar RNA, C/D box 42A///ribosomal protein L23a
212270_x_at	0.000244	5.12e-06	4.67147	3.80325	0.196843	RPL17-C18orf32///SNORD58C///C18orf32///SNORD58A///SNORD58B///RPL17	RPL17-C18orf32 readthrough///small nucleolar RNA, C/D box 58C///chromosome 18 open reading frame 32///small nucleolar RNA, C/D box 58A///small nucleolar RNA, C/D box 58B///ribosomal protein L17
1555497_a_at	1.39e-05	6.95e-08	-5.57642	7.82032	-1.56246	CYP4B1	cytochrome P450 family 4 subfamily B member 1
206539_s_at	0.00765	0.000679	-3.44545	-0.683746	-0.776743	CYP4F12	cytochrome P450 family 4 subfamily F member 12
227702_at	0.00159	7.63e-05	-4.02959	1.30846	-0.941349	CYP4X1	cytochrome P450 family 4 subfamily X member 1
237395_at	0.00261	0.000151	-3.85418	0.68155	-0.787852	CYP4Z1	cytochrome P450 family 4 subfamily Z member 1
228739_at	0.000259	5.53e-06	-4.65417	3.732	-0.826817	CYS1	cystin 1
228942_s_at	0.0426	0.00747	-2.6994	-2.81632	-0.554775	DAB2IP	DAB2 interacting protein
200777_s_at	0.00025	5.29e-06	4.6641	3.7729	0.237198	BZW1	basic leucine zipper and W2 domains 1
205472_s_at	0.00224	0.000121	-3.91189	0.885131	-0.582337	DACH1	dachshund family transcription factor 1
228915_at	0.00758	0.000671	-3.44876	-0.67321	-0.792732	DACH1	dachshund family transcription factor 1
218556_at	0.000251	5.33e-06	4.66271	3.76714	0.406958	ORMDL2	ORMDL sphingolipid biosynthesis regulator 2
212626_x_at	0.000251	5.33e-06	4.66264	3.76689	0.258299	HNRNPC	heterogeneous nuclear ribonucleoprotein C (C1/C2)
226656_at	0.000252	5.36e-06	-4.66147	3.76207	-0.411594	CRTAP	cartilage associated protein
206272_at	0.000252	5.36e-06	-4.66112	3.7606	-0.292629	SPHAR///RAB4A	S-phase response (cyclin related)///RAB4A, member RAS oncogene family
202282_at	0.000253	5.38e-06	4.66044	3.75781	0.281482	HSD17B10	hydroxysteroid 17-beta dehydrogenase 10
203139_at	1.28e-05	6.22e-08	-5.59842	7.92474	-0.5691	DAPK1	death associated protein kinase 1
213084_x_at	0.000255	5.44e-06	4.65804	3.74793	0.146383	SNORD42A///RPL23A	small nucleolar RNA, C/D box 42A///ribosomal protein L23a
223151_at	0.000257	5.48e-06	4.65616	3.74019	0.312888	DCUN1D5	defective in cullin neddylation 1 domain containing 5
229204_at	0.000257	5.5e-06	-4.65566	3.73814	-0.22844	HP1BP3	heterochromatin protein 1 binding protein 3
211214_s_at	0.0209	0.00271	-3.03235	-1.92334	-0.646882	DAPK1	death associated protein kinase 1
239162_at	0.00273	0.00016	-3.83934	0.629626	-0.568942	DAPK1-IT1	DAPK1 intronic transcript 1
202178_at	0.000259	5.54e-06	-4.65376	3.73035	-0.473667	PRKCZ	protein kinase C zeta
215184_at	7.38e-05	9.07e-07	-5.05004	5.41572	-0.599762	DAPK2	death associated protein kinase 2
226397_s_at	0.000259	5.56e-06	-4.65302	3.7273	-0.481895	PHACTR1	phosphatase and actin regulator 1
222339_x_at	0.00026	5.58e-06	-4.65216	3.72374	-0.452551
206324_s_at	0.000269	5.78e-06	-4.64412	3.69074	-0.651458	DAPK2	death associated protein kinase 2
1557617_at	0.01	0.000995	-3.33541	-1.02793	-0.509016	DCTN1-AS1	DCTN1 antisense RNA 1
203752_s_at	0.000269	5.8e-06	-4.64364	3.68875	-0.309164	JUND	JunD proto-oncogene, AP-1 transcription factor subunit
203720_s_at	0.00027	5.81e-06	4.64311	3.6866	0.346089	ERCC1	ERCC excision repair 1, endonuclease non-catalytic subunit
201429_s_at	0.00027	5.81e-06	4.64301	3.68616	0.149114	RPL37A	ribosomal protein L37a
218111_s_at	0.00027	5.81e-06	4.64297	3.68601	0.334481	CMAS	cytidine monophosphate N-acetylneuraminic acid synthetase
239425_at	0.000178	3.22e-06	-4.77507	4.23447	-0.640278	DCUN1D5	defective in cullin neddylation 1 domain containing 5
226250_at	0.000271	5.84e-06	-4.64178	3.68113	-0.435236	ZBTB20	zinc finger and BTB domain containing 20
226939_at	0.000272	5.89e-06	-4.64011	3.67428	-0.293157	CPEB2	cytoplasmic polyadenylation element binding protein 2
218260_at	0.0088	0.000828	3.38875	-0.862331	0.511567	DDA1	DET1 and DDB1 associated 1
202887_s_at	8.91e-06	3.42e-08	5.71539	8.48517	0.784781	DDIT4	DNA damage inducible transcript 4
1570128_at	0.000299	6.77e-06	-4.60851	3.545	-0.517989	DDX19A	DEAD-box helicase 19A
201211_s_at	0.000998	4.03e-05	4.18788	1.89475	0.581534	DDX3X	DEAD-box helicase 3, X-linked
1552412_a_at	0.0204	0.00263	3.04184	-1.89651	0.608493	DEFB106B///DEFB106A	defensin beta 106B///defensin beta 106A
201673_s_at	0.000273	5.93e-06	4.63851	3.66771	0.231233	GYS1	glycogen synthase 1
1562167_a_at	0.0253	0.00357	2.94476	-2.16758	0.5956	DEFB122	defensin beta 122 (pseudogene)
213687_s_at	0.000273	5.95e-06	4.63786	3.66506	0.261378	RPL35A	ribosomal protein L35a
207356_at	0.033	0.00521	2.82129	-2.5006	0.734368	DEFB4B///DEFB4A	defensin beta 4B///defensin beta 4A
201906_s_at	0.000274	5.97e-06	-4.63706	3.66178	-0.415235	CTDSPL	CTD small phosphatase like
219763_at	0.00617	0.000506	3.52865	-0.416822	0.73273	DENND1A	DENN domain containing 1A
216060_s_at	0.000275	6e-06	-4.63592	3.65709	-0.36531	DAAM1	dishevelled associated activator of morphogenesis 1
223199_at	0.000276	6.03e-06	-4.63457	3.65155	-0.38681	MKNK2	MAP kinase interacting serine/threonine kinase 2
221886_at	0.000452	1.25e-05	-4.46686	2.97456	-0.588315	DENND2A	DENN domain containing 2A
222958_s_at	0.00223	0.00012	3.91328	0.890066	0.732555	DEPDC1	DEP domain containing 1
206571_s_at	0.000277	6.06e-06	4.63347	3.64705	0.418414	MAP4K4	mitogen-activated protein kinase kinase kinase kinase 4
232278_s_at	0.00834	0.000768	3.41035	-0.794621	0.883701	DEPDC1	DEP domain containing 1
235545_at	0.0161	0.00189	3.14398	-1.60258	0.616212	DEPDC1	DEP domain containing 1
211013_x_at	0.000278	6.12e-06	4.63144	3.63875	0.407669	PML	promyelocytic leukemia
226980_at	0.0137	0.00152	3.21043	-1.4066	0.642152	DEPDC1B	DEP domain containing 1B
200889_s_at	0.000279	6.14e-06	4.63041	3.6345	0.383365	SSR1	signal sequence receptor subunit 1
200854_at	0.000279	6.15e-06	-4.63039	3.63443	-0.243698	NCOR1	nuclear receptor corepressor 1
228293_at	0.00748	0.000661	3.4531	-0.659421	0.502224	DEPDC7	DEP domain containing 7
229721_x_at	0.031	0.00479	2.84899	-2.42704	0.515558	DERL3	derlin 3
220323_at	0.00028	6.2e-06	4.62855	3.6269	0.292408	CNTD2	cyclin N-terminal domain containing 2
236472_at	0.00028	6.2e-06	-4.6283	3.62586	-0.44064
218056_at	0.00028	6.2e-06	-4.6282	3.62547	-0.277354	BFAR	bifunctional apoptosis regulator
212470_at	0.00028	6.21e-06	-4.62814	3.62524	-0.326129	SPAG9	sperm associated antigen 9
222936_s_at	0.039	0.00659	-2.7421	-2.70718	-0.540753	DESI2	desumoylating isopeptidase 2
224327_s_at	0.000493	1.44e-05	-4.43482	2.84757	-0.567539	DGAT2	diacylglycerol O-acyltransferase 2
231416_at	0.00231	0.000128	-3.89824	0.836723	-0.834018	DHDH	dihydrodiol dehydrogenase
1552730_at	0.0161	0.00189	-3.14366	-1.60352	-0.530555	DHH	desert hedgehog
228469_at	0.000286	6.35e-06	-4.62284	3.60355	-0.417637	PPID	peptidylprolyl isomerase D
204801_s_at	0.00486	0.000359	3.62294	-0.107502	0.581212	DHRS12	dehydrogenase/reductase 12
232596_at	0.00516	0.000393	3.59845	-0.188549	0.89498	DIAPH3	diaphanous related formin 3
231240_at	0.00133	5.98e-05	4.09051	1.53182	0.942669	DIO2	deiodinase, iodothyronine, type II
203699_s_at	0.00264	0.000153	3.85031	0.667983	1.04474	DIO2	deiodinase, iodothyronine, type II
201817_at	0.000289	6.45e-06	4.61956	3.59012	0.254129	UBE3C	ubiquitin protein ligase E3C
204131_s_at	0.000291	6.49e-06	-4.61809	3.58413	-0.269996	FOXO3	forkhead box O3
203700_s_at	0.00449	0.000323	3.65234	-0.009563	0.752335	DIO2	deiodinase, iodothyronine, type II
224889_at	0.000292	6.52e-06	-4.61685	3.57907	-0.305457	FOXO3	forkhead box O3
204839_at	0.000293	6.55e-06	4.61577	3.57465	0.267103	POP5	POP5 homolog, ribonuclease P/MRP subunit
223757_at	0.02	0.00255	-3.05146	-1.86921	-0.625591	DIO3OS	DIO3 opposite strand/antisense RNA (head to head)
220750_s_at	0.000296	6.64e-06	4.61283	3.56262	0.341377	P3H1	prolyl 3-hydroxylase 1
1557051_s_at	0.000297	6.66e-06	4.61209	3.55962	0.424524	HOTAIRM1	HOXA transcript antisense RNA, myeloid-specific 1
1556127_at	0.00764	0.000679	3.44556	-0.683367	0.72456	DIP2A	disco interacting protein 2 homolog A
200806_s_at	0.000297	6.68e-06	4.61161	3.55767	0.379248	HSPD1	heat shock protein family D (Hsp60) member 1
201661_s_at	0.000297	6.68e-06	-4.61143	3.55693	-0.29572	ACSL3	acyl-CoA synthetase long-chain family member 3
215506_s_at	0.000165	2.86e-06	-4.80125	4.34462	-0.838498	DIRAS3	DIRAS family GTPase 3
202542_s_at	0.000297	6.69e-06	4.6112	3.55597	0.226458	AIMP1	aminoacyl tRNA synthetase complex interacting multifunctional protein 1
224822_at	9.13e-06	3.56e-08	-5.70793	8.44918	-0.810405	DLC1	DLC1 Rho GTPase activating protein
224301_x_at	0.000299	6.74e-06	4.60933	3.54836	0.384709	H2AFJ	H2A histone family member J
210762_s_at	2e-05	1.35e-07	-5.44352	7.19598	-0.841082	DLC1	DLC1 Rho GTPase activating protein
222472_at	0.000299	6.75e-06	-4.60892	3.54669	-0.187378	AFTPH	aftiphilin
220512_at	7.42e-05	9.2e-07	-5.0471	5.4028	-0.853899	DLC1	DLC1 Rho GTPase activating protein
228098_s_at	0.0003	6.8e-06	-4.60747	3.54078	-0.44284	MYLIP	myosin regulatory light chain interacting protein
215988_s_at	0.00229	0.000125	3.90347	0.855267	0.670138	DLG1	discs large MAGUK scaffold protein 1
222644_s_at	0.000302	6.85e-06	4.60589	3.53432	0.370224	COLGALT1	collagen beta(1-O)galactosyltransferase 1
200933_x_at	0.000303	6.88e-06	4.60475	3.52966	0.148769	RPS4X	ribosomal protein S4, X-linked
203764_at	0.000474	1.35e-05	4.45016	2.90829	0.898771	DLGAP5	DLG associated protein 5
227938_s_at	0.00259	0.00015	3.85702	0.69152	0.557904	DLL1	delta like canonical Notch ligand 1
207147_at	0.00405	0.000278	3.69255	0.125515	0.790923	DLX2	distal-less homeobox 2
218727_at	0.000306	6.96e-06	4.60217	3.51918	0.312723	SLC38A7	solute carrier family 38 member 7
218452_at	0.00031	7.06e-06	4.59898	3.50616	0.196972	SMARCAL1	SWI/SNF related, matrix associated, actin dependent regulator of chromatin, subfamily a like 1
231778_at	0.0158	0.00184	-3.15272	-1.57703	-0.547268	DLX3	distal-less homeobox 3
1567377_at	0.0123	0.00132	3.25205	-1.28197	0.655936	DNAH1	dynein axonemal heavy chain 1
213890_x_at	0.00031	7.08e-06	4.59824	3.50316	0.154151	RPS16	ribosomal protein S16
235924_at	0.000311	7.11e-06	-4.59722	3.49899	-0.390283	FRK	fyn related Src family tyrosine kinase
210041_s_at	0.000312	7.13e-06	4.59662	3.49657	0.332065	PGM3	phosphoglucomutase 3
229738_at	0.026	0.00371	-2.93207	-2.20241	-0.833844	DNAH10	dynein axonemal heavy chain 10
204918_s_at	0.000312	7.15e-06	-4.59601	3.49408	-0.45154	MLLT3	MLLT3, super elongation complex subunit
1552957_at	0.00785	0.000702	-3.43608	-0.713422	-0.556913	DNAH6	dynein axonemal heavy chain 6
1553362_at	0.0114	0.00118	-3.28449	-1.18379	-0.842469	DNAH6	dynein axonemal heavy chain 6
209004_s_at	0.000314	7.21e-06	-4.59413	3.48644	-0.168772	FBXL5	F-box and leucine rich repeat protein 5
217835_x_at	0.000315	7.24e-06	4.59325	3.48284	0.358462	TGIF2-C20orf24///C20orf24	TGIF2-C20orf24 readthrough///chromosome 20 open reading frame 24
1565337_at	0.0231	0.00312	-2.98724	-2.04995	-0.701869	DNAH6	dynein axonemal heavy chain 6
208834_x_at	0.000317	7.29e-06	4.59158	3.47607	0.139336	SNORD42A///RPL23A	small nucleolar RNA, C/D box 42A///ribosomal protein L23a
207959_s_at	0.0278	0.00409	-2.90065	-2.28807	-0.812261	DNAH9	dynein axonemal heavy chain 9
223087_at	0.000317	7.32e-06	-4.59074	3.47264	-0.374506	ECHDC1	ethylmalonyl-CoA decarboxylase 1
221781_s_at	3.44e-08	6.29e-12	7.25538	16.6014	0.506791	DNAJC10	DnaJ heat shock protein family (Hsp40) member C10
203133_at	0.000317	7.33e-06	4.59026	3.4707	0.218726	SEC61B	Sec61 translocon beta subunit
217883_at	0.000317	7.34e-06	4.59004	3.46979	0.150017	MMADHC	methylmalonic aciduria and homocystinuria, cblD type
57082_at	0.000319	7.37e-06	-4.58895	3.46536	-0.256594	LDLRAP1	low density lipoprotein receptor adaptor protein 1
223721_s_at	0.00958	0.000936	3.35307	-0.973367	0.978811	DNAJC12	DnaJ heat shock protein family (Hsp40) member C12
208074_s_at	0.00032	7.41e-06	4.58771	3.46031	0.300324	AP2S1	adaptor related protein complex 2 sigma 1 subunit
224810_s_at	0.000321	7.44e-06	-4.58694	3.45721	-0.268665	ANKRD13A	ankyrin repeat domain 13A
204643_s_at	0.000321	7.45e-06	4.58672	3.45629	0.280801	ENOX2	ecto-NOX disulfide-thiol exchanger 2
223722_at	0.017	0.00203	3.12219	-1.66602	0.719179	DNAJC12	DnaJ heat shock protein family (Hsp40) member C12
218976_at	0.0185	0.0023	3.08335	-1.77814	0.713527	DNAJC12	DnaJ heat shock protein family (Hsp40) member C12
227081_at	0.000144	2.38e-06	-4.8414	4.51455	-0.887762	DNALI1	dynein axonemal light intermediate chain 1
210183_x_at	0.000322	7.51e-06	4.58482	3.44859	0.166928	PNN	pinin, desmosome associated protein
205554_s_at	0.0219	0.00289	-3.01238	-1.97961	-0.569974	DNASE1L3	deoxyribonuclease 1 like 3
209533_s_at	0.000323	7.53e-06	4.58412	3.44572	0.287618	PLAA	phospholipase A2 activating protein
222609_s_at	0.000323	7.54e-06	4.5838	3.44444	0.22838	EXOSC1	exosome component 1
220380_at	0.00309	0.000192	-3.79153	0.463531	-1.01221	DNASE2B	deoxyribonuclease 2 beta
228391_at	0.000326	7.61e-06	-4.58173	3.43603	-0.483588	CYP4V2	cytochrome P450 family 4 subfamily V member 2
226281_at	0.00862	0.000804	3.39702	-0.836454	0.842542	DNER	delta/notch like EGF repeat containing
207783_x_at	0.000327	7.64e-06	4.5807	3.43185	0.180948	HUWE1	HECT, UBA and WWE domain containing 1, E3 ubiquitin protein ligase
204049_s_at	0.000327	7.65e-06	-4.58043	3.43075	-0.359736	PHACTR2	phosphatase and actin regulator 2
219953_s_at	0.000327	7.66e-06	4.58023	3.42994	0.323546	AKIP1	A-kinase interacting protein 1
217834_s_at	0.000327	7.67e-06	4.5798	3.42819	0.384337	SYNCRIP	synaptotagmin binding cytoplasmic RNA interacting protein
213871_s_at	0.000774	2.79e-05	4.27737	2.23473	0.688304	DNPH1	2'-deoxynucleoside 5'-phosphate N-hydrolase 1
229969_at	0.000327	7.68e-06	-4.5796	3.42739	-0.389559	SEC63	SEC63 homolog, protein translocation regulator
225805_at	0.000327	7.69e-06	-4.5793	3.42616	-0.312702	HNRNPU	heterogeneous nuclear ribonucleoprotein U
215167_at	0.000327	7.7e-06	4.57913	3.42549	0.31916	MED14	mediator complex subunit 14
220320_at	0.00101	4.11e-05	4.1834	1.87788	0.710764	DOK3	docking protein 3
209691_s_at	5.2e-05	5.28e-07	-5.16404	5.92079	-0.586269	DOK4	docking protein 4
209690_s_at	0.00562	0.000443	-3.56508	-0.298175	-0.572457	DOK4	docking protein 4
231646_at	0.000675	2.3e-05	-4.32313	2.41093	-1.16084	DPCR1	diffuse panbronchiolitis critical region 1
241137_at	0.0216	0.00283	-3.01848	-1.96246	-0.726204	DPCR1	diffuse panbronchiolitis critical region 1
239848_at	0.000328	7.76e-06	-4.57736	3.4183	-0.496726	EIF3M	eukaryotic translation initiation factor 3 subunit M
205055_at	0.000328	7.77e-06	4.57694	3.41658	0.278484	ITGAE	integrin subunit alpha E
205983_at	0.032	0.00501	2.83442	-2.46582	0.529796	DPEP1	dipeptidase 1 (renal)
212481_s_at	0.000329	7.79e-06	4.57644	3.41459	0.451032	TPM4	tropomyosin 4
208695_s_at	0.000329	7.8e-06	4.57602	3.41287	0.134832	RPL39	ribosomal protein L39
211478_s_at	0.0113	0.00118	-3.28582	-1.17976	-0.690034	DPP4	dipeptidyl peptidase 4
228039_at	0.000329	7.81e-06	-4.57577	3.41187	-0.323218	DDX46	DEAD-box helicase 46
58308_at	0.000329	7.82e-06	-4.57556	3.41101	-0.228075	TRIM62	tripartite motif containing 62
202958_at	0.000329	7.82e-06	4.57546	3.41058	0.247919	PTPN9	protein tyrosine phosphatase, non-receptor type 9
1553530_a_at	0.000329	7.83e-06	4.5753	3.40996	0.335966	ITGB1	integrin subunit beta 1
203717_at	0.0157	0.00182	-3.15544	-1.56905	-0.541687	DPP4	dipeptidyl peptidase 4
217202_s_at	0.000332	7.91e-06	4.5729	3.4002	0.383636	GLUL	glutamate-ammonia ligase
213071_at	0.00212	0.000113	-3.92902	0.94605	-0.783563	DPT	dermatopontin
201179_s_at	0.000332	7.92e-06	4.57259	3.39897	0.265021	GNAI3	G protein subunit alpha i3
213068_at	0.0128	0.00139	-3.23621	-1.32958	-0.640212	DPT	dermatopontin
204244_s_at	0.000332	7.95e-06	4.57173	3.39549	0.445446	DBF4	DBF4 zinc finger
206065_s_at	0.0149	0.0017	-3.17575	-1.50934	-0.55742	DPYS	dihydropyrimidinase
204023_at	0.000332	7.96e-06	4.57151	3.39458	0.439392	RFC4	replication factor C subunit 4
201430_s_at	7.3e-05	8.87e-07	5.0547	5.43616	0.741818	DPYSL3	dihydropyrimidinase like 3
218627_at	0.00288	0.000173	-3.81904	0.558884	-0.592885	DRAM1	DNA damage regulated autophagy modulator 1
227728_at	0.000336	8.06e-06	-4.56861	3.38284	-0.32359	PPM1A	protein phosphatase, Mg2+/Mn2+ dependent 1A
231133_at	0.0153	0.00176	-3.16607	-1.53784	-0.928729	DRC1	dynein regulatory complex subunit 1
214652_at	0.0201	0.00256	-3.04991	-1.87361	-0.661773	DRD1	dopamine receptor D1
241908_at	0.000337	8.1e-06	4.56745	3.37813	0.27714	BROX	BRO1 domain and CAAX motif containing
225736_at	0.000337	8.11e-06	4.5671	3.37673	0.281564	FBXO22	F-box protein 22
221480_at	0.000337	8.13e-06	-4.56673	3.37523	-0.299036	HNRNPD	heterogeneous nuclear ribonucleoprotein D
216918_s_at	0.0254	0.00357	2.94419	-2.16914	0.529221	DST	dystonin
201954_at	0.000337	8.14e-06	4.5662	3.37308	0.296049	ARPC1B	actin related protein 2/3 complex subunit 1B
205335_s_at	0.000338	8.16e-06	4.56573	3.37117	0.239809	SRP19	signal recognition particle 19
222680_s_at	0.00268	0.000157	3.84454	0.647783	0.53696	DTL	denticleless E3 ubiquitin protein ligase homolog
201036_s_at	0.000338	8.18e-06	-4.56529	3.3694	-0.340081	HADH	hydroxyacyl-CoA dehydrogenase
205324_s_at	0.000338	8.19e-06	4.56491	3.36786	0.317408	FTSJ1	FtsJ RNA methyltransferase homolog 1 (E. coli)
228710_at	0.000338	8.2e-06	-4.56478	3.36734	-0.369142
225474_at	0.00034	8.24e-06	-4.56356	3.3624	-0.497702	MAGI1	membrane associated guanylate kinase, WW and PDZ domain containing 1
227084_at	0.00147	6.83e-05	-4.05741	1.41008	-0.576992	DTNA	dystrobrevin alpha
1553569_at	0.000341	8.3e-06	4.56193	3.35581	0.202392	COX2	cytochrome c oxidase subunit II
202034_x_at	0.000341	8.31e-06	-4.56173	3.35497	-0.26741	RB1CC1	RB1 inducible coiled-coil 1
203022_at	0.000341	8.31e-06	4.56159	3.35442	0.446364	RNASEH2A	ribonuclease H2 subunit A
210091_s_at	0.00533	0.000412	-3.5856	-0.230865	-0.535449	DTNA	dystrobrevin alpha
227334_at	0.000341	8.32e-06	-4.56128	3.35319	-0.48673	USP54	ubiquitin specific peptidase 54
210611_s_at	0.00685	0.000586	-3.48727	-0.550283	-0.551097	DTNA	dystrobrevin alpha
219597_s_at	0.0016	7.7e-05	-4.02734	1.30027	-1.11306	DUOX1	dual oxidase 1
1553193_at	0.000342	8.36e-06	-4.56024	3.34896	-0.400994	ZNF441	zinc finger protein 441
215800_at	0.00398	0.000272	-3.69846	0.145464	-0.541895	DUOX1	dual oxidase 1
209681_at	0.000344	8.41e-06	-4.5589	3.34353	-0.473323	SLC19A2	solute carrier family 19 member 2
38703_at	0.000344	8.41e-06	4.55875	3.34296	0.212695	DNPEP	aspartyl aminopeptidase
219727_at	0.0233	0.00316	-2.98331	-2.06092	-0.783892	DUOX2	dual oxidase 2
224656_s_at	0.000345	8.45e-06	4.5578	3.33909	0.172252	LUZP6///MTPN	leucine zipper protein 6///myotrophin
1554648_a_at	0.000227	4.63e-06	-4.69415	3.897	-0.870044	DUOXA1	dual oxidase maturation factor 1
212537_x_at	0.000346	8.49e-06	4.55669	3.3346	0.198479	RPL17-C18orf32///SNORD58C///C18orf32///SNORD58A///SNORD58B///RPL17	RPL17-C18orf32 readthrough///small nucleolar RNA, C/D box 58C///chromosome 18 open reading frame 32///small nucleolar RNA, C/D box 58A///small nucleolar RNA, C/D box 58B///ribosomal protein L17
221747_at	0.000346	8.5e-06	-4.55645	3.33363	-0.47563	TNS1	tensin 1
1555404_a_at	0.0083	0.000763	-3.41208	-0.789167	-0.788302	DUOXA1	dual oxidase maturation factor 1
201044_x_at	0.00602	0.000486	-3.53975	-0.380804	-0.781322	DUSP1	dual specificity phosphatase 1
208201_at	0.00263	0.000153	-3.85158	0.672443	-0.616692	DUX4L24///DBET///LOC100291626///DUX4///LOC100288289///LOC100287823///LOC100133400///DUX4L2///DUX4L3///DUX4L5///DUX4L6///DUX4L7///LOC652301///DUX4L4///DUX4L8///DUX3///DUX4L1	double homeobox 4 like 24///D4Z4 binding element transcript (non-protein coding)///double homeobox protein 4-like///double homeobox 4///double homeobox protein 4-like protein 2-like///double homeobox protein 4-like protein 4///double homeobox protein 4-like protein 4-like///double homeobox 4 like 2///double homeobox 4 like 3///double homeobox 4 like 5///double homeobox 4 like 6///double homeobox …
225583_at	0.000355	8.74e-06	-4.55006	3.30784	-0.318309	UXS1	UDP-glucuronate decarboxylase 1
229042_s_at	0.00558	0.000438	-3.56848	-0.287056	-0.550277	DYNC1H1	dynein cytoplasmic 1 heavy chain 1
210907_s_at	0.000357	8.82e-06	4.54791	3.29916	0.294016	PDCD10	programmed cell death 10
223991_s_at	0.000357	8.83e-06	4.54779	3.29867	0.427824	GALNT2	polypeptide N-acetylgalactosaminyltransferase 2
236698_at	0.000418	1.11e-05	-4.49453	3.08483	-0.577393	DYNC1I2	dynein cytoplasmic 1 intermediate chain 2
210544_s_at	0.000357	8.83e-06	-4.54755	3.29771	-0.4392	ALDH3A2	aldehyde dehydrogenase 3 family member A2
238492_at	0.000357	8.84e-06	-4.54737	3.29697	-0.440605
214756_x_at	0.000358	8.88e-06	4.54647	3.29336	0.211639	PMS2P1	PMS1 homolog 2, mismatch repair system component pseudogene 1
228033_at	0.000689	2.39e-05	4.31458	2.37789	0.674517	E2F7	E2F transcription factor 7
219990_at	0.0141	0.00159	3.19709	-1.44626	0.604594	E2F8	E2F transcription factor 8
212464_s_at	0.00036	8.94e-06	4.54476	3.28644	0.217764	FN1	fibronectin 1
219787_s_at	0.000828	3.06e-05	4.25483	2.14851	0.533041	ECT2	epithelial cell transforming 2
234992_x_at	0.00327	0.000207	3.77145	0.394324	0.555845	ECT2	epithelial cell transforming 2
211131_s_at	0.0312	0.00484	-2.8458	-2.43554	-0.541644	EDA	ectodysplasin A
235960_at	0.000361	8.99e-06	-4.54344	3.28111	-0.437625	FXR1	FMR1 autosomal homolog 1
204273_at	0.00544	0.000422	-3.57852	-0.254131	-0.672383	EDNRB	endothelin receptor type B
220006_at	7.96e-06	2.86e-08	-5.75004	8.65285	-1.22229	EFCC1	EF-hand and coiled-coil domain containing 1
239477_at	0.00937	0.000909	-3.36176	-0.946444	-1.12065	EFHB	EF-hand domain family member B
208728_s_at	0.000361	9e-06	-4.54317	3.28004	-0.178244	CDC42	cell division cycle 42
216483_s_at	0.000361	9.02e-06	4.54277	3.27845	0.248498	MYDGF	myeloid derived growth factor
200051_at	0.000361	9.02e-06	4.54276	3.27839	0.212745	SART1	squamous cell carcinoma antigen recognized by T-cells 1
220591_s_at	0.000399	1.04e-05	-4.51006	3.14695	-0.787096	EFHC2	EF-hand domain containing 2
203255_at	0.000364	9.13e-06	-4.54004	3.26743	-0.261104	FBXO11	F-box protein 11
233814_at	0.00477	0.00035	3.63035	-0.082879	0.544897	EFNA5	ephrin A5
202850_at	0.000365	9.15e-06	-4.53947	3.26512	-0.293169	ABCD3	ATP binding cassette subfamily D member 3
226911_at	6.84e-05	8.12e-07	5.07339	5.51845	0.69226	EGFLAM	EGF like, fibronectin type III and laminin G domains
204559_s_at	0.000367	9.22e-06	4.53765	3.2578	0.30156	LSM7	LSM7 homolog, U6 small nuclear RNA and mRNA degradation associated
222847_s_at	2.83e-06	5.11e-09	6.07747	10.2734	1.30962	EGLN3	egl-9 family hypoxia inducible factor 3
224395_s_at	0.000369	9.28e-06	4.53623	3.2521	0.28562	RNF7	ring finger protein 7
202483_s_at	0.000369	9.29e-06	4.53609	3.25153	0.39576	RANBP1	RAN binding protein 1
221961_at	0.000369	9.3e-06	-4.5357	3.24996	-0.241648	CLCN7	chloride voltage-gated channel 7
213377_x_at	0.00037	9.32e-06	4.53518	3.24785	0.13364	RPS12	ribosomal protein S12
204186_s_at	0.000373	9.41e-06	4.53312	3.23955	0.341011	PPID	peptidylprolyl isomerase D
223681_s_at	0.000373	9.41e-06	-4.53297	3.23896	-0.435037	PATJ	PATJ, crumbs cell polarity complex component
219380_x_at	0.000373	9.42e-06	-4.53267	3.23777	-0.40063	POLH	DNA polymerase eta
219232_s_at	5.27e-05	5.38e-07	5.16004	5.90292	0.823897	EGLN3	egl-9 family hypoxia inducible factor 3
201693_s_at	0.0171	0.00206	-3.11792	-1.67842	-0.515098	EGR1	early growth response 1
237988_at	0.0216	0.00283	-3.01812	-1.96348	-0.529334	EIF1B	eukaryotic translation initiation factor 1B
202137_s_at	0.000375	9.49e-06	-4.53115	3.23162	-0.31372	ZMYND11	zinc finger MYND-type containing 11
1557837_a_at	0.0161	0.00188	3.14518	-1.59906	0.684033	ELMOD2	ELMO domain containing 2
240592_at	0.000376	9.54e-06	-4.52998	3.22691	-0.265691	LCORL	ligand dependent nuclear receptor corepressor like
226287_at	0.000376	9.54e-06	4.52979	3.22615	0.479081	CCDC34	coiled-coil domain containing 34
227874_at	0.00698	0.000601	-3.48011	-0.573232	-0.565948	EMCN	endomucin
226366_at	0.000376	9.57e-06	-4.52924	3.22397	-0.257086	SHPRH	SNF2 histone linker PHD RING helicase
1564796_at	0.0238	0.00326	-2.97337	-2.08853	-0.678699	EMP1	epithelial membrane protein 1
225078_at	1.67e-05	9.9e-08	-5.50611	7.48859	-0.648703	EMP2	epithelial membrane protein 2
225079_at	0.000643	2.15e-05	-4.33916	2.47301	-0.52816	EMP2	epithelial membrane protein 2
1559404_a_at	0.000382	9.75e-06	-4.52486	3.20634	-0.392657	HMGN3-AS1	HMGN3 antisense RNA 1
204975_at	0.000741	2.62e-05	-4.29272	2.29366	-0.610865	EMP2	epithelial membrane protein 2
223893_at	0.000996	4.02e-05	-4.1884	1.89672	-1.19119	ENAM	enamelin
225291_at	0.000384	9.82e-06	4.52324	3.19984	0.388036	PNPT1	polyribonucleotide nucleotidyltransferase 1
230177_at	0.000386	9.86e-06	-4.52228	3.196	-0.457213	GTF2H2B///GTF2H2	general transcription factor IIH subunit 2B (pseudogene)///general transcription factor IIH subunit 2
223190_s_at	0.000386	9.87e-06	-4.52195	3.19467	-0.254141	KMT2E	lysine methyltransferase 2E
217294_s_at	0.00812	0.000739	3.42147	-0.759593	0.556474	ENO1	enolase 1
229375_at	0.000387	9.91e-06	-4.52101	3.19089	-0.294847	PPIE	peptidylprolyl isomerase E
222800_at	0.000388	9.94e-06	-4.52032	3.18812	-0.343394	TRNAU1AP	tRNA selenocysteine 1 associated protein 1
220153_at	7.59e-05	9.46e-07	5.0411	5.37649	0.545387	ENTPD7	ectonucleoside triphosphate diphosphohydrolase 7
222738_at	0.000388	9.97e-06	-4.51961	3.18527	-0.435731	WWC2///CLDN22	WW and C2 domain containing 2///claudin 22
226776_at	6.05e-06	1.91e-08	-5.82812	9.03339	-0.575031	ENY2	ENY2, transcription and export complex 2 subunit
1562921_at	0.000403	1.05e-05	-4.50702	3.13481	-0.873689	EP300-AS1	EP300 antisense RNA 1
230951_at	4.23e-06	9.35e-09	-5.96404	9.70474	-0.770984	EPB41L5	erythrocyte membrane protein band 4.1 like 5
231069_at	0.000392	1.01e-05	-4.51699	3.17477	-0.413678
1565454_at	0.000392	1.01e-05	4.51692	3.17449	0.264729	XAGE-4	XAGE-4 protein
1553538_s_at	0.000392	1.01e-05	4.51656	3.17304	0.152284	COX1	cytochrome c oxidase subunit I
225855_at	0.000288	6.41e-06	-4.62094	3.59576	-0.605005	EPB41L5	erythrocyte membrane protein band 4.1 like 5
206070_s_at	0.0039	0.000265	-3.70556	0.169484	-0.688098	EPHA3	EPH receptor A3
230425_at	0.00861	0.000803	3.39751	-0.834907	0.652945	EPHB1	EPH receptor B1
217856_at	0.000395	1.02e-05	-4.51406	3.16301	-0.485985	RBM8A	RNA binding motif protein 8A
238931_at	0.000395	1.02e-05	-4.51367	3.16145	-0.331637	LOC284009///METTL16	uncharacterized LOC284009///methyltransferase like 16
207257_at	1.71e-05	1.04e-07	-5.49709	7.44627	-1.0469	EPO	erythropoietin
234555_at	0.0017	8.32e-05	-4.00753	1.22829	-0.64422	EPPK1	epiplakin 1
201665_x_at	0.000396	1.03e-05	4.51278	3.15789	0.171108	RPS17	ribosomal protein S17
235732_at	0.000398	1.03e-05	-4.51159	3.15309	-0.403922	ZNF704	zinc finger protein 704
206439_at	0.00634	0.000526	3.51751	-0.452904	1.24459	EPYC	epiphycan
204376_at	0.000398	1.03e-05	-4.51114	3.15129	-0.456679	DCAF1	DDB1 and CUL4 associated factor 1
233498_at	0.00631	0.000521	-3.51996	-0.444965	-0.803158	ERBB4	erb-b2 receptor tyrosine kinase 4
214053_at	0.00632	0.000523	-3.51897	-0.448189	-0.943228	ERBB4	erb-b2 receptor tyrosine kinase 4
242380_at	0.000401	1.05e-05	-4.50868	3.14145	-0.476193
206794_at	0.0105	0.00106	-3.31741	-1.08328	-0.54221	ERBB4	erb-b2 receptor tyrosine kinase 4
213938_at	0.00519	0.000396	3.59654	-0.194845	0.527979	ERC2	ELKS/RAB6-interacting/CAST family member 2
219650_at	0.00134	5.99e-05	4.09018	1.53059	0.742371	ERCC6L	ERCC excision repair 6 like, spindle assembly checkpoint helicase
1556766_at	0.011	0.00113	3.29763	-1.14379	0.54067	ERICH1	glutamate rich 1
1553238_a_at	0.000403	1.05e-05	-4.50697	3.1346	-0.487828	HIPK4	homeodomain interacting protein kinase 4
222646_s_at	1.03e-05	4.31e-08	5.67056	8.26937	0.844956	ERO1A	endoplasmic reticulum oxidoreductase 1 alpha
212471_at	0.000403	1.06e-05	4.50655	3.13292	0.474095	AVL9	AVL9 cell migration associated
215778_x_at	0.000404	1.06e-05	-4.50616	3.13136	-0.35029	HAB1	B1 for mucin
203235_at	0.000404	1.06e-05	4.50557	3.12898	0.264481	THOP1	thimet oligopeptidase 1
207243_s_at	0.000404	1.06e-05	4.50549	3.12868	0.118883	CALM3///CALM2///CALM1	calmodulin 3///calmodulin 2///calmodulin 1
225750_at	1.49e-05	8e-08	5.54852	7.68831	0.545035	ERO1A	endoplasmic reticulum oxidoreductase 1 alpha
219539_at	0.000405	1.06e-05	4.50479	3.12585	0.333423	GEMIN6	gem nuclear organelle associated protein 6
200098_s_at	0.000405	1.07e-05	4.50435	3.12412	0.165745	ANAPC5	anaphase promoting complex subunit 5
201241_at	0.000406	1.07e-05	4.50389	3.12226	0.187493	DDX1	DEAD/H-box helicase 1
222304_x_at	0.000406	1.07e-05	-4.50366	3.12136	-0.483833	OR7E47P	olfactory receptor family 7 subfamily E member 47 pseudogene
218498_s_at	9.46e-05	1.28e-06	4.97673	5.0956	0.667116	ERO1A	endoplasmic reticulum oxidoreductase 1 alpha
38158_at	0.00143	6.56e-05	4.06731	1.44641	0.548896	ESPL1	extra spindle pole bodies like 1, separase
224376_s_at	0.000406	1.07e-05	4.50321	3.11954	0.43077	TGIF2-C20orf24///C20orf24	TGIF2-C20orf24 readthrough///chromosome 20 open reading frame 24
208638_at	0.000406	1.07e-05	4.50284	3.11805	0.18713	PDIA6	protein disulfide isomerase family A member 6
212869_x_at	0.000407	1.07e-05	4.5023	3.11589	0.14458	LOC101928826///TPT1	uncharacterized LOC101928826///tumor protein, translationally-controlled 1
242277_at	0.000407	1.08e-05	-4.50212	3.11516	-0.439475
221752_at	0.000408	1.08e-05	4.5015	3.1127	0.275396	SSH1	slingshot protein phosphatase 1
204817_at	0.00166	8.07e-05	4.01545	1.25703	0.544782	ESPL1	extra spindle pole bodies like 1, separase
242772_x_at	0.000409	1.08e-05	-4.50034	3.10806	-0.405124
224699_s_at	2.53e-06	3.47e-09	6.1496	10.6391	0.64876	ESYT2	extended synaptotagmin 2
211987_at	0.000414	1.1e-05	-4.49747	3.09659	-0.162143	TOP2B	topoisomerase (DNA) II beta
1555830_s_at	5.19e-06	1.47e-08	5.87795	9.27823	0.613329	ESYT2	extended synaptotagmin 2
203796_s_at	0.000415	1.1e-05	-4.49674	3.09366	-0.325037	BCL7A	BCL tumor suppressor 7A
230415_at	0.000417	1.11e-05	-4.49526	3.08775	-0.420124
1558511_s_at	3.53e-05	3.07e-07	5.27661	6.42819	0.588161	ESYT2	extended synaptotagmin 2
1555829_at	0.00792	0.000713	3.43162	-0.727556	0.510558	ESYT2	extended synaptotagmin 2
239770_at	4.01e-06	8.73e-09	-5.97716	9.77009	-1.17668	ESYT3	extended synaptotagmin 3
1554912_at	0.000172	3.03e-06	-4.7888	4.29215	-1.34888	ESYT3	extended synaptotagmin 3
1557793_at	0.00198	0.000103	-3.95276	1.03088	-0.667156	ESYT3	extended synaptotagmin 3
236204_at	0.000419	1.12e-05	-4.49323	3.07962	-0.293277	COPS8	COP9 signalosome subunit 8
201389_at	0.000419	1.12e-05	4.49296	3.07854	0.493329	ITGA5	integrin subunit alpha 5
224728_at	0.000419	1.12e-05	-4.49274	3.07767	-0.344929	ATPAF1	ATP synthase mitochondrial F1 complex assembly factor 1
224752_at	0.00042	1.12e-05	4.49219	3.07547	0.286091	LOC101930655///C7orf73	uncharacterized LOC101930655///chromosome 7 open reading frame 73
1552718_at	0.00042	1.12e-05	-4.49213	3.07524	-0.333359	DTD1	D-tyrosyl-tRNA deacylase 1
240912_x_at	0.0324	0.00508	2.82961	-2.47858	0.55139	EWSAT1	Ewing sarcoma associated transcript 1
219103_at	0.00042	1.12e-05	-4.49192	3.0744	-0.442011	ASAP3	ArfGAP with SH3 domain, ankyrin repeat and PH domain 3
204603_at	0.00139	6.34e-05	4.07614	1.47886	1.07408	EXO1	exonuclease 1
203701_s_at	0.00042	1.13e-05	4.49162	3.07322	0.238391	TRMT1	tRNA methyltransferase 1
230677_at	0.000855	3.22e-05	-4.24257	2.10179	-0.714713	EXOC3L4	exocyst complex component 3 like 4
205200_at	0.000305	6.95e-06	-4.60249	3.52047	-0.826058	EXOSC7///CLEC3B	exosome component 7///C-type lectin domain family 3 member B
201217_x_at	0.000421	1.13e-05	4.49038	3.06827	0.13992	SNORD83B///SNORD139///RPL3	small nucleolar RNA, C/D box 83B///small nucleolar RNA, C/D box 139///ribosomal protein L3
213929_at	4.97e-05	4.99e-07	-5.17607	5.97461	-0.599095	EXPH5	exophilin 5
205356_at	0.000422	1.14e-05	-4.48959	3.06509	-0.491901	USP13	ubiquitin specific peptidase 13 (isopeptidase T-3)
205709_s_at	0.000422	1.14e-05	-4.48934	3.06411	-0.467723	CDS1	CDP-diacylglycerol synthase 1
202961_s_at	0.000422	1.14e-05	4.48919	3.06352	0.332115	ARMC2-AS1///ATP5J2	ARMC2 antisense RNA 1///ATP synthase, H+ transporting, mitochondrial Fo complex subunit F2
203358_s_at	0.000955	3.79e-05	4.20301	1.95179	0.560872	EZH2	enhancer of zeste 2 polycomb repressive complex 2 subunit
206610_s_at	0.00101	4.12e-05	-4.1824	1.87415	-1.16305	F11	coagulation factor XI
200782_at	0.000422	1.14e-05	4.48832	3.06003	0.202236	ANXA5	annexin A5
1569592_a_at	0.00127	5.62e-05	-4.1062	1.58979	-0.995672	F11	coagulation factor XI
205774_at	0.00966	0.000948	3.34934	-0.984904	0.509845	F12	coagulation factor XII
237414_at	0.00928	0.000895	-3.36614	-0.932816	-0.555567	F7	coagulation factor VII
1557915_s_at	0.000427	1.16e-05	4.48508	3.04709	0.302871	GSTO1	glutathione S-transferase omega 1
201588_at	0.000428	1.16e-05	4.48482	3.04605	0.205556	TXNL1	thioredoxin like 1
200744_s_at	0.000428	1.16e-05	4.48467	3.04545	0.343481	GNB1	G protein subunit beta 1
242931_at	0.000429	1.16e-05	-4.48385	3.04221	-0.494993
200987_x_at	0.000429	1.16e-05	4.48381	3.04205	0.356816	PSME3	proteasome activator subunit 3
228428_at	0.00413	0.000286	-3.68525	0.100867	-0.596769	FAM102A	family with sequence similarity 102 member A
208634_s_at	0.00043	1.17e-05	-4.48285	3.03822	-0.267902	MACF1	microtubule-actin crosslinking factor 1
224585_x_at	0.00043	1.17e-05	4.48245	3.03662	0.111463	ACTG1///ACTB	actin gamma 1///actin beta
214724_at	0.000431	1.17e-05	-4.48198	3.03475	-0.411657	DIXDC1	DIX domain containing 1
209074_s_at	0.00101	4.11e-05	-4.18323	1.87725	-1.10425	FAM107A	family with sequence similarity 107 member A
230983_at	0.0304	0.00464	-2.85913	-2.39994	-0.523505	FAM129C	family with sequence similarity 129 member C
208637_x_at	0.000434	1.18e-05	4.47981	3.02609	0.386236	ACTN1	actinin alpha 1
1554547_at	0.000566	1.76e-05	-4.38734	2.66082	-0.711283	FAM13C	family with sequence similarity 13 member C
208990_s_at	0.000435	1.19e-05	-4.47886	3.02232	-0.198316	HNRNPH3	heterogeneous nuclear ribonucleoprotein H3
227132_at	0.000436	1.19e-05	-4.47806	3.01912	-0.321568	ZNF706	zinc finger protein 706
200870_at	0.000438	1.2e-05	4.4769	3.01451	0.239632	STRAP	serine/threonine kinase receptor associated protein
214889_at	0.000282	6.25e-06	-4.6265	3.6185	-0.632447	FAM149A	family with sequence similarity 149 member A
222291_at	0.00167	8.16e-05	-4.01244	1.24608	-0.56594	FAM149A	family with sequence similarity 149 member A
236072_at	0.00044	1.21e-05	-4.47516	3.00759	-0.386092
214890_s_at	0.00374	0.00025	-3.72125	0.222699	-0.652443	FAM149A	family with sequence similarity 149 member A
226335_at	0.000441	1.21e-05	-4.47448	3.00485	-0.294517	RPS6KA3	ribosomal protein S6 kinase A3
238018_at	0.000195	3.66e-06	-4.74647	4.11466	-0.994287	FAM150B	family with sequence similarity 150 member B
217740_x_at	0.000443	1.22e-05	4.4736	3.00136	0.149303	SNORD24///SNORD36A///SNORD36B///RPL7A	small nucleolar RNA, C/D box 24///small nucleolar RNA, C/D box 36A///small nucleolar RNA, C/D box 36B///ribosomal protein L7a
222095_s_at	0.00231	0.000126	3.90112	0.846931	0.652564	FAM163A	family with sequence similarity 163 member A
1552448_a_at	0.036	0.00588	-2.78075	-2.60705	-0.537139	FAM167A-AS1	FAM167A antisense RNA 1
231128_at	0.00415	0.000288	3.68351	0.095004	0.706481	FAM181B	family with sequence similarity 181 member B
220150_s_at	1.19e-05	5.39e-08	-5.62646	8.05829	-0.757295	FAM184A	family with sequence similarity 184 member A
1558523_at	0.000273	5.92e-06	-4.63903	3.66985	-1.02871	FAM184A	family with sequence similarity 184 member A
223128_at	0.000448	1.24e-05	4.46964	2.9856	0.219803	FOXRED1	FAD dependent oxidoreductase domain containing 1
218101_s_at	0.000449	1.24e-05	4.46908	2.98338	0.201479	NDUFC2-KCTD14///NDUFC2	NDUFC2-KCTD14 readthrough///NADH:ubiquinone oxidoreductase subunit C2
213900_at	0.000376	9.52e-06	-4.53026	3.22808	-0.761321	FAM189A2	family with sequence similarity 189 member A2
218118_s_at	0.00045	1.25e-05	4.46799	2.97906	0.219229	TIMM23B///TIMM23	translocase of inner mitochondrial membrane 23 homolog B///translocase of inner mitochondrial membrane 23
241399_at	0.018	0.00221	-3.09578	-1.74239	-0.589466	FAM19A2	family with sequence similarity 19 member A2, C-C motif chemokine like
229655_at	0.0125	0.00134	3.24756	-1.29548	0.658441	FAM19A5	family with sequence similarity 19 member A5, C-C motif chemokine like
1554747_a_at	0.000451	1.25e-05	4.46725	2.97611	0.294058	2019-09-02	septin 2
226722_at	0.000108	1.57e-06	4.93185	4.90148	0.510469	FAM20C	family with sequence similarity 20 member C
222416_at	0.000452	1.25e-05	4.46651	2.97317	0.30518	ALDH18A1	aldehyde dehydrogenase 18 family member A1
240871_at	0.0161	0.00189	-3.14459	-1.60081	-0.685549	FAM221B	family with sequence similarity 221 member B
224637_at	0.000457	1.27e-05	4.4637	2.96198	0.251069	OST4	oligosaccharyltransferase complex subunit 4, non-catalytic
201240_s_at	0.000457	1.27e-05	4.46354	2.96136	0.143243	SPCS2	signal peptidase complex subunit 2
216347_s_at	0.000457	1.27e-05	-4.46343	2.96092	-0.394795	PPP1R13B	protein phosphatase 1 regulatory subunit 13B
215487_x_at	0.0187	0.00232	-3.08025	-1.78702	-0.586158	FAM27B///FAM27C///FAM182B	family with sequence similarity 27 member B///family with sequence similarity 27 member C///family with sequence similarity 182 member B
201226_at	0.000457	1.27e-05	4.4631	2.95962	0.281696	NDUFB8	NADH:ubiquinone oxidoreductase subunit B8
1563920_at	0.0125	0.00134	3.24749	-1.29569	0.667105	FAM45A	family with sequence similarity 45 member A
204977_at	0.000459	1.28e-05	4.46188	2.95475	0.238854	DDX10	DEAD-box helicase 10
226276_at	0.000459	1.28e-05	4.46149	2.95321	0.37295	TMEM167A	transmembrane protein 167A
223542_at	0.000459	1.28e-05	4.46129	2.95242	0.352967	SLF1	SMC5-SMC6 complex localization factor 1
221591_s_at	0.00137	6.2e-05	4.08168	1.49924	0.612083	FAM64A	family with sequence similarity 64 member A
220964_s_at	0.000459	1.28e-05	4.46105	2.95149	0.203201	RAB1B	RAB1B, member RAS oncogene family
229002_at	0.0136	0.0015	-3.21458	-1.39423	-0.599431	FAM69B	family with sequence similarity 69 member B
239014_at	0.00046	1.29e-05	4.46029	2.94847	0.403348	CCAR1	cell division cycle and apoptosis regulator 1
225834_at	0.00716	0.000622	3.47049	-0.603994	0.532104	FAM72A///FAM72D///FAM72B///FAM72C	family with sequence similarity 72 member A///family with sequence similarity 72 member D///family with sequence similarity 72 member B///family with sequence similarity 72 member C
215004_s_at	0.000464	1.3e-05	4.45814	2.93994	0.160751	SUGP1	SURP and G-patch domain containing 1
1554074_s_at	0.000464	1.3e-05	-4.45801	2.93943	-0.482866	SLFNL1	schlafen like 1
223461_at	0.000465	1.3e-05	4.4573	2.93657	0.330723	TBC1D7	TBC1 domain family member 7
240065_at	0.00348	0.000226	-3.74787	0.313443	-0.876207	FAM81B	family with sequence similarity 81 member B
238741_at	0.000355	8.74e-06	4.54991	3.30725	0.851585	FAM83A	family with sequence similarity 83 member A
239586_at	0.000929	3.61e-05	4.21476	1.99622	0.829239	FAM83A	family with sequence similarity 83 member A
203436_at	0.000467	1.32e-05	4.45535	2.92884	0.223811	RPP30	ribonuclease P/MRP subunit p30
238460_at	0.0066	0.000556	3.50205	-0.50277	1.03956	FAM83A	family with sequence similarity 83 member A
218136_s_at	0.000468	1.32e-05	4.45493	2.92719	0.364792	SLC25A37	solute carrier family 25 member 37
242944_at	0.00871	0.000818	3.39233	-0.851153	0.669454	FAM83A	family with sequence similarity 83 member A
203306_s_at	0.000469	1.32e-05	-4.45369	2.92225	-0.318125	SLC35A1	solute carrier family 35 member A1
241406_at	0.0196	0.00249	3.05919	-1.84721	0.588413	FAM83H	family with sequence similarity 83 member H
213008_at	2.18e-05	1.53e-07	5.41903	7.08218	0.799213	FANCI	Fanconi anemia complementation group I
239775_at	0.000472	1.33e-05	-4.45223	2.91648	-0.39311	LOC101927609	uncharacterized LOC101927609
214764_at	0.000472	1.33e-05	-4.45195	2.91537	-0.379367	RRP15	ribosomal RNA processing 15 homolog
219114_at	0.000472	1.34e-05	-4.45189	2.91515	-0.329803	C3orf18	chromosome 3 open reading frame 18
213007_at	7.68e-05	9.63e-07	5.03722	5.35946	0.654379	FANCI	Fanconi anemia complementation group I
201550_x_at	0.000473	1.34e-05	4.45075	2.9106	0.124506	ACTG1///ACTB	actin gamma 1///actin beta
212116_at	0.000473	1.34e-05	4.45051	2.90966	0.257483	TRIM27	tripartite motif containing 27
231971_at	0.0124	0.00133	-3.2508	-1.28573	-0.551988	FANCM	Fanconi anemia complementation group M
209955_s_at	4.14e-05	3.86e-07	5.22951	6.21486	0.766626	FAP	fibroblast activation protein alpha
225523_at	0.000477	1.36e-05	4.44842	2.90137	0.254389	MRPL53///CCDC142	mitochondrial ribosomal protein L53///coiled-coil domain containing 142
239919_at	0.000477	1.36e-05	-4.4481	2.9001	-0.488405	TBX5-AS1	TBX5 antisense RNA 1
224733_at	0.000477	1.36e-05	4.4479	2.89933	0.448256	CMTM3	CKLF like MARVEL transmembrane domain containing 3
224571_at	0.000481	1.37e-05	-4.44613	2.89231	-0.292381	IRF2BP2	interferon regulatory factor 2 binding protein 2
200685_at	0.000482	1.37e-05	-4.44552	2.8899	-0.439685	SRSF11	serine and arginine rich splicing factor 11
230293_at	0.000483	1.38e-05	-4.44475	2.88685	-0.295876	MEAF6	MYST/Esa1 associated factor 6
237240_at	0.000484	1.38e-05	-4.44381	2.88314	-0.391168
222606_at	0.000484	1.38e-05	4.44363	2.88242	0.331951	ZWILCH	zwilch kinetochore protein
200687_s_at	0.000485	1.39e-05	4.44325	2.88093	0.271507	SF3B3	splicing factor 3b subunit 3
217908_s_at	0.000485	1.39e-05	-4.44293	2.87963	-0.256557	DCAF6	DDB1 and CUL4 associated factor 6
1555730_a_at	0.000485	1.39e-05	4.44271	2.87879	0.339361	CFL1	cofilin 1
236029_at	1.72e-05	1.05e-07	-5.49358	7.42979	-1.11262	FAT3	FAT atypical cadherin 3
244350_at	0.000486	1.39e-05	-4.44238	2.87746	-0.398815	MYO10	myosin X
1558964_at	8.47e-05	1.1e-06	-5.00928	5.23727	-0.825042	FAT3	FAT atypical cadherin 3
200945_s_at	0.000487	1.4e-05	4.4414	2.87359	0.141178	SEC31A	SEC31 homolog A, COPII coat complex component
203710_at	0.000488	1.4e-05	-4.44072	2.8709	-0.40663	ITPR1	inositol 1,4,5-trisphosphate receptor type 1
211801_x_at	0.000489	1.41e-05	4.43994	2.86781	0.264899	MFN1	mitofusin 1
202444_s_at	0.000489	1.41e-05	4.43964	2.86663	0.345061	ERLIN1	ER lipid raft associated 1
219427_at	9.99e-05	1.4e-06	-4.95711	5.01059	-0.664751	FAT4	FAT atypical cadherin 4
204427_s_at	0.000489	1.41e-05	4.43952	2.86617	0.373268	TMED2	transmembrane p24 trafficking protein 2
229718_at	0.00049	1.41e-05	-4.43917	2.86477	-0.323656	N4BP2L1	NEDD4 binding protein 2 like 1
230467_at	0.00049	1.41e-05	-4.43905	2.8643	-0.431593	TMEM52	transmembrane protein 52
203088_at	0.00959	0.000938	-3.35242	-0.975395	-0.54727	FBLN5	fibulin 5
201697_s_at	0.00049	1.41e-05	4.43882	2.86338	0.281523	DNMT1	DNA (cytosine-5-)-methyltransferase 1
212020_s_at	0.00049	1.41e-05	4.43835	2.86153	0.445924	MKI67	marker of proliferation Ki-67
227802_at	0.00049	1.41e-05	-4.43832	2.86142	-0.374113	RUFY3	RUN and FYVE domain containing 3
241669_x_at	0.000491	1.42e-05	-4.43791	2.85978	-0.312565	PRKD2	protein kinase D2
213579_s_at	0.000492	1.42e-05	-4.43706	2.85642	-0.214845	EP300	E1A binding protein p300
227737_at	0.000492	1.42e-05	4.43694	2.85594	0.270048	SRPRB	SRP receptor beta subunit
225539_at	0.000492	1.42e-05	-4.43688	2.85573	-0.290879	ZBTB21	zinc finger and BTB domain containing 21
220896_at	0.000468	1.32e-05	4.45494	2.92722	0.799499	FBXL18	F-box and leucine rich repeat protein 18
218364_at	0.000492	1.43e-05	-4.43661	2.85466	-0.215976	LRRFIP2	LRR binding FLII interacting protein 2
209206_at	0.000492	1.43e-05	4.43624	2.85319	0.214056	LOC102724364///SEC22B	vesicle-trafficking protein SEC22b-like///SEC22 homolog B, vesicle trafficking protein (gene/pseudogene)
241350_at	0.0515	0.00975	2.60654	-3.04807	0.638521	FBXL22	F-box and leucine rich repeat protein 22
213000_at	0.000493	1.43e-05	-4.43531	2.8495	-0.178514	MORC3	MORC family CW-type zinc finger 3
214891_at	0.0015	7.05e-05	-4.04921	1.38005	-0.568027	FBXO21	F-box protein 21
225328_at	8.66e-05	1.13e-06	5.00295	5.20967	0.641685	FBXO32	F-box protein 32
231387_at	0.000493	1.44e-05	-4.4348	2.8475	-0.352546	PXDC1	PX domain containing 1
241763_s_at	0.000113	1.69e-06	4.91664	4.83603	0.749056	FBXO32	F-box protein 32
228096_at	0.000495	1.44e-05	-4.43374	2.8433	-0.412473	MINOS1	mitochondrial inner membrane organizing system 1
225803_at	0.000281	6.23e-06	4.62715	3.62119	0.663525	FBXO32	F-box protein 32
223568_s_at	0.000496	1.45e-05	4.4332	2.84117	0.42423	PLPP5	phospholipid phosphatase 5
241762_at	0.00122	5.36e-05	4.11795	1.63334	0.677911	FBXO32	F-box protein 32
216775_at	0.000497	1.45e-05	-4.43247	2.8383	-0.460801	USP53	ubiquitin specific peptidase 53
225345_s_at	0.00474	0.000346	3.63342	-0.072663	0.522735	FBXO32	F-box protein 32
211734_s_at	0.00956	0.000934	-3.35381	-0.971067	-0.619609	FCER1A	Fc fragment of IgE receptor Ia
214511_x_at	0.00499	0.000374	3.6122	-0.143096	0.572819	FCGR1B	Fc fragment of IgG receptor Ib
243886_at	0.000504	1.48e-05	-4.42859	2.82298	-0.450516
204635_at	0.000504	1.48e-05	-4.42823	2.82154	-0.424929	RPS6KA5	ribosomal protein S6 kinase A5
213883_s_at	0.000504	1.48e-05	-4.42807	2.82094	-0.190991	TM2D1	TM2 domain containing 1
200815_s_at	0.000505	1.48e-05	4.42755	2.81887	0.274206	PAFAH1B1	platelet activating factor acetylhydrolase 1b regulatory subunit 1
216950_s_at	0.00307	0.00019	3.79488	0.475115	0.528329	FCGR1CP///FCGR1B///FCGR1A	Fc fragment of IgG receptor Ic, pseudogene///Fc fragment of IgG receptor Ib///Fc fragment of IgG receptor Ia
202591_s_at	0.000506	1.49e-05	4.42664	2.81527	0.267028	SSBP1	single stranded DNA binding protein 1
210992_x_at	0.00254	0.000145	3.86445	0.717596	0.836069	FCGR2C	Fc fragment of IgG receptor IIc (gene/pseudogene)
238071_at	0.000508	1.49e-05	-4.42566	2.8114	-0.34552	LCN10	lipocalin 10
214435_x_at	0.000508	1.49e-05	4.42554	2.81094	0.470223	RALA	RALA Ras like proto-oncogene A
212589_at	0.000508	1.5e-05	-4.42522	2.80967	-0.366606	RRAS2	related RAS viral (r-ras) oncogene homolog 2
1557954_at	0.000509	1.5e-05	-4.42464	2.80741	-0.296843	TXLNG	taxilin gamma
202298_at	0.000509	1.5e-05	4.42454	2.80701	0.394433	NDUFA1	NADH:ubiquinone oxidoreductase subunit A1
204006_s_at	0.000804	2.94e-05	4.26489	2.18694	0.937283	FCGR3B///FCGR3A	Fc fragment of IgG receptor IIIb///Fc fragment of IgG receptor IIIa
213477_x_at	0.00051	1.51e-05	4.42365	2.80349	0.140221	EEF1A1	eukaryotic translation elongation factor 1 alpha 1
224192_at	0.00231	0.000126	3.90116	0.847058	0.749454	FCRL2	Fc receptor like 2
221239_s_at	0.00262	0.000152	3.85289	0.677026	0.791045	FCRL2	Fc receptor like 2
204767_s_at	3.17e-05	2.59e-07	5.3113	6.58625	0.602185	FEN1	flap structure-specific endonuclease 1
217437_s_at	0.000513	1.52e-05	-4.42185	2.79638	-0.479864	TACC1	transforming acidic coiled-coil containing protein 1
243750_x_at	0.000513	1.52e-05	4.42177	2.79607	0.317518	FAM207A	family with sequence similarity 207 member A
206445_s_at	0.000513	1.52e-05	4.42175	2.79598	0.360795	PRMT1	protein arginine methyltransferase 1
225838_at	0.000513	1.52e-05	-4.42124	2.79399	-0.230949	EPC2	enhancer of polycomb homolog 2
204988_at	0.0147	0.00168	3.18039	-1.49565	1.28683	FGB	fibrinogen beta chain
230561_s_at	0.000513	1.52e-05	-4.42088	2.79258	-0.475915	KANSL1L	KAT8 regulatory NSL complex subunit 1 like
230559_x_at	4.82e-05	4.77e-07	-5.18522	6.01562	-0.593397	FGD4	FYVE, RhoGEF and PH domain containing 4
208649_s_at	0.000516	1.53e-05	4.41928	2.78628	0.254401	VCP	valosin containing protein
1552721_a_at	0.0131	0.00142	3.22972	-1.34903	0.547867	FGF1	fibroblast growth factor 1
212788_x_at	0.000517	1.54e-05	4.41867	2.78385	0.125972	FTL	ferritin light chain
231382_at	0.0228	0.00307	-2.99243	-2.03548	-0.502322	FGF18	fibroblast growth factor 18
201257_x_at	0.000517	1.54e-05	4.41836	2.78264	0.128209	SNORD73A///RPS3A	small nucleolar RNA, C/D box 73A///ribosomal protein S3A
1555103_s_at	0.0101	0.00101	3.3319	-1.03875	0.630194	FGF7	fibroblast growth factor 7
1555102_at	0.0126	0.00136	3.24356	-1.30752	0.881337	FGF7	fibroblast growth factor 7
223836_at	0.0197	0.0025	-3.05801	-1.85055	-0.564754	FGFBP2	fibroblast growth factor binding protein 2
224685_at	0.000518	1.55e-05	-4.41742	2.77893	-0.280682	AFDN	afadin, adherens junction formation factor
201516_at	0.000521	1.56e-05	4.41598	2.77326	0.307839	SRM	spermidine synthase
224831_at	0.000522	1.56e-05	-4.41538	2.77092	-0.341165	CPEB4	cytoplasmic polyadenylation element binding protein 4
211399_at	4.29e-05	4.03e-07	-5.22055	6.17444	-0.898863	FGFR2	fibroblast growth factor receptor 2
208228_s_at	0.00385	0.00026	-3.71079	0.187192	-0.5556	FGFR2	fibroblast growth factor receptor 2
200755_s_at	0.000523	1.57e-05	4.4143	2.76665	0.391557	CALU	calumenin
224790_at	0.000523	1.57e-05	4.41415	2.76606	0.41383	ASAP1	ArfGAP with SH3 domain, ankyrin repeat and PH domain 1
211762_s_at	0.000524	1.57e-05	4.41376	2.76454	0.465366	KPNA2	karyopherin subunit alpha 2
203638_s_at	0.00609	0.000495	-3.53438	-0.398242	-0.523822	FGFR2	fibroblast growth factor receptor 2
220465_at	0.000524	1.57e-05	-4.41339	2.76307	-0.28884	CEBPA-AS1	CEBPA antisense RNA 1 (head to head)
213867_x_at	0.000524	1.57e-05	4.41329	2.76267	0.116071	ACTB	actin beta
223007_s_at	0.000525	1.58e-05	-4.41253	2.75969	-0.402382	TMEM245	transmembrane protein 245
223091_x_at	0.000526	1.58e-05	4.41206	2.75782	0.258375	MFF	mitochondrial fission factor
209026_x_at	0.000528	1.59e-05	4.41079	2.75283	0.393516	TUBB	tubulin beta class I
222438_at	0.000528	1.59e-05	-4.4107	2.75249	-0.260348	MED4	mediator complex subunit 4
36920_at	0.000531	1.6e-05	-4.40963	2.74828	-0.283101	MTM1	myotubularin 1
1555705_a_at	0.000531	1.6e-05	4.40931	2.74702	0.454973	CMTM3	CKLF like MARVEL transmembrane domain containing 3
214047_s_at	0.000531	1.6e-05	4.40912	2.74627	0.232415	MBD4	methyl-CpG binding domain 4, DNA glycosylase
211048_s_at	0.000531	1.6e-05	4.40901	2.74585	0.424989	PDIA4	protein disulfide isomerase family A member 4
222690_s_at	0.000531	1.6e-05	4.40891	2.74545	0.233746	TMEM39A	transmembrane protein 39A
203639_s_at	0.0227	0.00304	-2.99546	-2.02702	-0.597513	FGFR2	fibroblast growth factor receptor 2
204379_s_at	0.000364	9.13e-06	-4.53995	3.26706	-0.956002	FGFR3	fibroblast growth factor receptor 3
221607_x_at	0.000533	1.62e-05	4.40722	2.73879	0.111958	ACTG1///ACTB	actin gamma 1///actin beta
222018_at	0.000533	1.62e-05	4.40719	2.73868	0.343629	NACA	nascent polypeptide-associated complex alpha subunit
208612_at	0.000534	1.62e-05	4.40678	2.73707	0.26073	PDIA3	protein disulfide isomerase family A member 3
204579_at	8.07e-05	1.03e-06	-5.02297	5.29706	-1.0918	FGFR4	fibroblast growth factor receptor 4
201338_x_at	0.000538	1.63e-05	4.40497	2.72996	0.242059	GTF3A	general transcription factor IIIA
221265_s_at	0.000538	1.63e-05	4.40475	2.7291	0.201183	VWA9	von Willebrand factor A domain containing 9
211237_s_at	0.0382	0.0064	-2.75191	-2.6819	-0.630234	FGFR4	fibroblast growth factor receptor 4
201540_at	4.97e-05	4.98e-07	-5.17618	5.97512	-0.875502	FHL1	four and a half LIM domains 1
210299_s_at	0.000122	1.86e-06	-4.89542	4.74493	-1.10198	FHL1	four and a half LIM domains 1
200725_x_at	0.000544	1.66e-05	4.40137	2.71582	0.13854	SNORA70///RPL10	small nucleolar RNA, H/ACA box 70///ribosomal protein L10
207707_s_at	0.000546	1.66e-05	4.40051	2.71243	0.265602	SEC13	SEC13 homolog, nuclear pore and COPII coat complex component
230409_at	0.000548	1.67e-05	-4.39938	2.708	-0.478072	MAGI3	membrane associated guanylate kinase, WW and PDZ domain containing 3
217212_s_at	0.000548	1.67e-05	-4.3991	2.70693	-0.304279	IL9R	interleukin 9 receptor
225116_at	0.000549	1.67e-05	4.39877	2.70562	0.305334	HIPK2	homeodomain interacting protein kinase 2
1555131_a_at	0.000549	1.67e-05	-4.39871	2.70539	-0.435584	PER3	period circadian clock 3
210298_x_at	0.000732	2.57e-05	-4.29647	2.30806	-0.806775	FHL1	four and a half LIM domains 1
209446_s_at	0.000549	1.68e-05	4.39806	2.70282	0.438726
210594_x_at	0.000549	1.68e-05	4.39785	2.70199	0.26577	MPZL1	myelin protein zero like 1
229828_at	0.000549	1.68e-05	-4.39779	2.70176	-0.267927	CDC73	cell division cycle 73
201539_s_at	0.00108	4.52e-05	-4.15961	1.78864	-0.76567	FHL1	four and a half LIM domains 1
229821_at	0.000551	1.69e-05	-4.39702	2.69876	-0.336587	LRRC37A4P	leucine rich repeat containing 37 member A4, pseudogene
202697_at	0.000551	1.69e-05	4.39664	2.69727	0.428959	NUDT21	nudix hydrolase 21
200918_s_at	0.000551	1.69e-05	4.39642	2.6964	0.24885	SRPRA	SRP receptor alpha subunit
229317_at	0.000553	1.7e-05	-4.39554	2.69297	-0.371876	KPNA5	karyopherin subunit alpha 5
209797_at	0.000554	1.7e-05	4.39511	2.69126	0.246329	CNPY2	canopy FGF signaling regulator 2
204833_at	0.000555	1.7e-05	4.39468	2.68958	0.360553	ATG12	autophagy related 12
201094_at	0.000556	1.71e-05	4.39411	2.68733	0.143017	RPS29	ribosomal protein S29
201723_s_at	0.000556	1.71e-05	4.39362	2.68541	0.322461	GALNT1	polypeptide N-acetylgalactosaminyltransferase 1
230183_at	0.000557	1.71e-05	-4.39329	2.68411	-0.345014	EXT1	exostosin glycosyltransferase 1
235425_at	0.000557	1.71e-05	4.39323	2.6839	0.499517	SGO2	shugoshin 2
227925_at	0.000558	1.72e-05	4.39267	2.68171	0.375407	ST3GAL4-AS1	ST3GAL4 antisense RNA 1 (head to head)
1558703_at	0.000558	1.72e-05	-4.39242	2.68072	-0.389337	SLC46A1	solute carrier family 46 member 1
212693_at	0.000558	1.72e-05	-4.39233	2.68036	-0.245794	MDN1	midasin AAA ATPase 1
214505_s_at	0.00296	0.000179	-3.80937	0.525298	-0.551285	FHL1	four and a half LIM domains 1
236200_at	0.000561	1.73e-05	-4.39054	2.67335	-0.35192	FAF1	Fas associated factor 1
202949_s_at	0.000633	2.09e-05	4.34591	2.49924	0.733611	FHL2	four and a half LIM domains 2
220170_at	0.000597	1.91e-05	-4.36785	2.58463	-0.751181	FHL5	four and a half LIM domains 5
201676_x_at	0.000563	1.74e-05	4.38917	2.66797	0.198425	PSMA1	proteasome subunit alpha 1
1555191_a_at	0.00435	0.000308	-3.66519	0.033445	-0.713002	FHL5	four and a half LIM domains 5
218980_at	0.00477	0.00035	3.6304	-0.082732	0.706553	FHOD3	formin homology 2 domain containing 3
1556325_at	0.000211	4.14e-06	-4.71941	4.00186	-0.633407	FILIP1	filamin A interacting protein 1
201083_s_at	0.000565	1.75e-05	-4.38793	2.66313	-0.201084	BCLAF1	BCL2 associated transcription factor 1
235183_at	0.000562	1.74e-05	-4.38999	2.67118	-0.684561	FILIP1	filamin A interacting protein 1
201405_s_at	0.000565	1.75e-05	4.38775	2.66243	0.256919	COPS6	COP9 signalosome subunit 6
1570515_a_at	0.00297	0.00018	-3.80846	0.522151	-0.619144	FILIP1	filamin A interacting protein 1
1553928_at	0.000566	1.76e-05	4.38716	2.66009	0.401603	ELMOD2	ELMO domain containing 2
229129_at	0.000566	1.76e-05	-4.38689	2.65903	-0.32412	HNRNPD	heterogeneous nuclear ribonucleoprotein D
219390_at	1.38e-06	1.39e-09	6.3179	11.5039	0.632506	FKBP14	FK506 binding protein 14
237298_at	0.0344	0.00553	-2.80101	-2.55402	-0.620363	FLJ26850	FLJ26850 protein
1552388_at	0.00736	0.000645	-3.45996	-0.637606	-0.839277	FLJ30901///SCUBE1	uncharacterized protein FLJ30901///signal peptide, CUB domain and EGF like domain containing 1
212991_at	0.000567	1.77e-05	-4.38606	2.65579	-0.459608	FBXO9	F-box protein 9
201524_x_at	0.000567	1.77e-05	4.38589	2.65513	0.201095	UBE2N	ubiquitin conjugating enzyme E2 N
202185_at	0.00057	1.78e-05	4.38455	2.64987	0.297234	PLOD3	procollagen-lysine,2-oxoglutarate 5-dioxygenase 3
212196_at	0.000571	1.78e-05	-4.38404	2.64791	-0.312674	IL6ST	interleukin 6 signal transducer
203743_s_at	0.000571	1.78e-05	4.38376	2.64679	0.207443	TDG	thymine DNA glycosylase
1559277_at	0.0133	0.00146	-3.22165	-1.37315	-0.775613	FLJ35700	uncharacterized protein FLJ35700
208748_s_at	0.000395	1.02e-05	4.51439	3.16433	0.532039	FLOT1	flotillin 1
236128_at	0.000571	1.79e-05	-4.38318	2.64452	-0.352232	ZNF91	zinc finger protein 91
212137_at	0.000572	1.79e-05	4.38282	2.64312	0.200726	LARP1	La ribonucleoprotein domain family member 1
219250_s_at	0.00835	0.000769	-3.40982	-0.796277	-0.626888	FLRT3	fibronectin leucine rich transmembrane protein 3
217980_s_at	0.000572	1.79e-05	4.38265	2.64245	0.21369	MRPL16	mitochondrial ribosomal protein L16
233757_x_at	0.000573	1.8e-05	4.38207	2.64019	0.346144
212293_at	0.000574	1.8e-05	-4.38155	2.63814	-0.25256	HIPK1	homeodomain interacting protein kinase 1
212780_at	0.000574	1.8e-05	4.38141	2.6376	0.217541	SOS1	SOS Ras/Rac guanine nucleotide exchange factor 1
204497_at	0.000574	1.8e-05	-4.38116	2.63662	-0.472001	ADCY9	adenylate cyclase 9
203025_at	0.000575	1.81e-05	4.38037	2.63354	0.28408	NAA10	N(alpha)-acetyltransferase 10, NatA catalytic subunit
222853_at	0.00911	0.000869	-3.37456	-0.906622	-0.626746	FLRT3	fibronectin leucine rich transmembrane protein 3
209432_s_at	0.000578	1.82e-05	4.37924	2.62913	0.227627	CREB3	cAMP responsive element binding protein 3
228268_at	0.00262	0.000152	-3.85325	0.678295	-0.655503	FMO2	flavin containing monooxygenase 2
211726_s_at	0.00534	0.000413	-3.58489	-0.233206	-0.621382	FMO2	flavin containing monooxygenase 2
218048_at	0.00058	1.83e-05	4.37796	2.62411	0.195439	COMMD3	COMM domain containing 3
201920_at	0.000581	1.83e-05	4.37748	2.62223	0.408027	SLC20A1	solute carrier family 20 member 1
209082_s_at	0.000583	1.84e-05	4.37636	2.61784	0.396174	COL18A1	collagen type XVIII alpha 1 chain
228566_at	0.000583	1.84e-05	4.37634	2.61778	0.32789	RPRD1A	regulation of nuclear pre-mRNA domain containing 1A
202051_s_at	0.000584	1.85e-05	-4.37575	2.61547	-0.216242	ZMYM4	zinc finger MYM-type containing 4
238527_at	0.000584	1.85e-05	-4.37559	2.61485	-0.467275	CLUHP3	clustered mitochondria homolog pseudogene 3
215300_s_at	0.00851	0.000788	-3.40293	-0.81793	-0.725557	FMO5	flavin containing monooxygenase 5
205776_at	0.0138	0.00154	-3.2064	-1.4186	-0.630847	FMO5	flavin containing monooxygenase 5
1553588_at	0.000588	1.86e-05	4.37356	2.60691	0.144166	SH3KBP1///ND3	SH3 domain containing kinase binding protein 1///NADH dehydrogenase, subunit 3 (complex I)
214701_s_at	3.83e-05	3.48e-07	5.25087	6.3114	0.702974	FN1	fibronectin 1
200737_at	0.000589	1.87e-05	4.3728	2.60396	0.398136	PGK1	phosphoglycerate kinase 1
201898_s_at	0.00059	1.87e-05	4.37223	2.60173	0.311285	UBE2A	ubiquitin conjugating enzyme E2 A
200038_s_at	0.00059	1.88e-05	4.37195	2.60064	0.185774	RPL17-C18orf32///SNORD58C///C18orf32///SNORD58A///SNORD58B///RPL17	RPL17-C18orf32 readthrough///small nucleolar RNA, C/D box 58C///chromosome 18 open reading frame 32///small nucleolar RNA, C/D box 58A///small nucleolar RNA, C/D box 58B///ribosomal protein L17
1553570_x_at	0.000591	1.88e-05	4.37162	2.59935	0.18178	COX2	cytochrome c oxidase subunit II
221030_s_at	0.000591	1.88e-05	-4.3712	2.59771	-0.484565	ARHGAP24	Rho GTPase activating protein 24
214702_at	0.00554	0.000434	3.5713	-0.277818	0.573082	FN1	fibronectin 1
226930_at	9.74e-05	1.33e-06	4.96797	5.05761	1.1122	FNDC1	fibronectin type III domain containing 1
214632_at	0.000593	1.89e-05	4.37027	2.59408	0.421305	NRP2	neuropilin 2
222547_at	0.000593	1.89e-05	4.37014	2.59356	0.291487	MAP4K4	mitogen-activated protein kinase kinase kinase kinase 4
200819_s_at	0.000593	1.89e-05	4.36973	2.59196	0.160385	RPS15	ribosomal protein S15
218279_s_at	0.000593	1.89e-05	4.36966	2.5917	0.400537	HIST2H2AA4///HIST2H2AA3	histone cluster 2, H2aa4///histone cluster 2, H2aa3
238961_s_at	0.00912	0.000871	3.37399	-0.908393	0.604561	FNDC3A	fibronectin type III domain containing 3A
226096_at	0.035	0.00567	-2.79287	-2.57536	-0.77429	FNDC5	fibronectin type III domain containing 5
226460_at	5.03e-06	1.34e-08	-5.89539	9.36427	-0.502286	FNIP2	folliculin interacting protein 2
229573_at	0.000597	1.91e-05	-4.36782	2.58453	-0.457543	USP9X	ubiquitin specific peptidase 9, X-linked
227890_at	0.000597	1.91e-05	4.36778	2.58434	0.416499	TMEM198	transmembrane protein 198
205860_x_at	0.00655	0.000548	3.50597	-0.490147	0.555611	FOLH1B///FOLH1	folate hydrolase 1B///folate hydrolase (prostate-specific membrane antigen) 1
204437_s_at	0.00511	0.000387	-3.60266	-0.174642	-1.08536	FOLR1	folate receptor 1
209189_at	0.0094	0.000913	-3.3605	-0.950331	-0.650596	FOS	Fos proto-oncogene, AP-1 transcription factor subunit
201521_s_at	0.000603	1.93e-05	4.36478	2.57266	0.338223	NCBP2	nuclear cap binding protein subunit 2
202768_at	0.000823	3.03e-05	-4.2575	2.15872	-1.67974	FOSB	FosB proto-oncogene, AP-1 transcription factor subunit
221637_s_at	0.000603	1.94e-05	4.36423	2.57054	0.29465	C11orf98///LBHD1	chromosome 11 open reading frame 98///LBH domain containing 1
218881_s_at	0.039	0.00661	2.74129	-2.70928	0.552598	FOSL2	FOS like 2, AP-1 transcription factor subunit
213064_at	0.000606	1.95e-05	-4.36303	2.56584	-0.229991	ZC3H14	zinc finger CCCH-type containing 14
227126_at	0.000606	1.95e-05	-4.36287	2.56523	-0.472384	PTPRG	protein tyrosine phosphatase, receptor type G
202477_s_at	0.000607	1.95e-05	4.3622	2.56262	0.207236	TUBGCP2	tubulin gamma complex associated protein 2
202630_at	0.00061	1.96e-05	-4.36108	2.55823	-0.25267	APPBP2	amyloid beta precursor protein binding protein 2
40284_at	0.000221	4.47e-06	-4.70211	3.93	-1.08025	FOXA2	forkhead box A2
210103_s_at	0.00141	6.44e-05	-4.07206	1.46385	-0.88906	FOXA2	forkhead box A2
201724_s_at	0.000614	1.98e-05	4.35899	2.55011	0.28618	GALNT1	polypeptide N-acetylgalactosaminyltransferase 1
201742_x_at	0.000614	1.98e-05	4.3587	2.54897	0.234168	SRSF1	serine and arginine rich splicing factor 1
213359_at	0.000614	1.98e-05	4.35859	2.54856	0.432302	HNRNPD	heterogeneous nuclear ribonucleoprotein D
217718_s_at	0.000615	1.99e-05	4.35823	2.54713	0.122279	YWHAB	tyrosine 3-monooxygenase/tryptophan 5-monooxygenase activation protein beta
224457_at	0.0234	0.00319	-2.98093	-2.06754	-0.522654	FOXD2-AS1	FOXD2 antisense RNA 1 (head to head)
224456_s_at	0.034	0.00544	-2.80693	-2.53846	-0.505781	FOXD2-AS1	FOXD2 antisense RNA 1 (head to head)
221492_s_at	0.000615	1.99e-05	4.35797	2.54611	0.19794	ATG3	autophagy related 3
203050_at	0.000616	2e-05	4.35733	2.54365	0.218191	TP53BP1	tumor protein p53 binding protein 1
1568986_x_at	0.000616	2e-05	-4.35719	2.54309	-0.249405	PIGT	phosphatidylinositol glycan anchor biosynthesis class T
205906_at	0.000131	2.06e-06	-4.87362	4.65173	-0.689766	FOXJ1	forkhead box J1
200827_at	0.000616	2e-05	4.35676	2.54141	0.281509	PLOD1	procollagen-lysine,2-oxoglutarate 5-dioxygenase 1
212522_at	0.000618	2.01e-05	-4.35608	2.53876	-0.3448	PDE8A	phosphodiesterase 8A
205436_s_at	0.000619	2.01e-05	4.35539	2.5361	0.420182	H2AFX	H2A histone family member X
202578_s_at	0.00062	2.02e-05	4.35493	2.5343	0.268806	DDX19A	DEAD-box helicase 19A
41856_at	0.000621	2.02e-05	4.35457	2.53289	0.369271	UNC5B	unc-5 netrin receptor B
202580_x_at	7.25e-05	8.75e-07	5.05777	5.44968	0.953959	FOXM1	forkhead box M1
231233_at	0.000621	2.02e-05	4.35417	2.53133	0.479442	PCAT6	prostate cancer associated transcript 6 (non-protein coding)
226009_at	0.000621	2.02e-05	4.35405	2.53086	0.334402	DPCD	deleted in primary ciliary dyskinesia homolog (mouse)
1561627_at	0.000621	2.02e-05	-4.35405	2.53085	-0.443068
221334_s_at	0.000793	2.88e-05	-4.2697	2.20534	-0.587239	FOXP3	forkhead box P3
224211_at	0.000817	3e-05	4.25953	2.16649	0.821905	FOXP3	forkhead box P3
211160_x_at	0.000623	2.03e-05	4.3527	2.52563	0.386971	ACTN1	actinin alpha 1
216037_x_at	0.000623	2.04e-05	-4.35226	2.52389	-0.258692	TCF7L2	transcription factor 7 like 2
50221_at	0.000623	2.04e-05	-4.35225	2.52388	-0.320384	TFEB	transcription factor EB
205210_at	0.000623	2.04e-05	4.35214	2.52342	0.185884	TGFBRAP1	transforming growth factor beta receptor associated protein 1
227475_at	0.000361	8.96e-06	-4.54426	3.28442	-0.85622	FOXQ1	forkhead box Q1
226145_s_at	0.00254	0.000145	-3.86518	0.720155	-0.743967	FRAS1	Fraser extracellular matrix complex subunit 1
210927_x_at	0.000626	2.05e-05	4.35073	2.51796	0.195092	JTB	jumping translocation breakpoint
201918_at	0.000626	2.05e-05	-4.35072	2.51791	-0.343341	SLC25A36	solute carrier family 25 member 36
1558201_s_at	0.000628	2.06e-05	4.34973	2.51405	0.169701	SLC4A1AP	solute carrier family 4 member 1 adaptor protein
239364_at	0.000628	2.06e-05	4.34951	2.51322	0.391054	ETV6	ETS variant 6
244764_at	0.000628	2.06e-05	-4.34937	2.51266	-0.399076	HIVEP3	human immunodeficiency virus type I enhancer binding protein 3
230964_at	0.000113	1.68e-06	-4.91819	4.84266	-1.04175	FREM2	FRAS1 related extracellular matrix protein 2
225142_at	0.000631	2.08e-05	4.34799	2.50732	0.390209	KDM7A	lysine demethylase 7A
213056_at	2.53e-07	1.02e-10	-6.78154	13.9677	-0.567464	FRMD4B	FERM domain containing 4B
224464_s_at	0.000632	2.08e-05	4.34736	2.50485	0.278454	NUDT22	nudix hydrolase 22
200929_at	0.000632	2.08e-05	4.34729	2.5046	0.353486	TMED10	transmembrane p24 trafficking protein 10
222537_s_at	0.000632	2.08e-05	4.34705	2.50366	0.2554	CDC42SE1	CDC42 small effector 1
225464_at	0.00224	0.000121	3.911	0.881968	0.519548	FRMD6	FERM domain containing 6
228444_at	0.000632	2.09e-05	-4.34681	2.50274	-0.476191	ARRB1	arrestin beta 1
226688_at	0.000632	2.09e-05	-4.34678	2.50258	-0.257707	TCAIM	T-cell activation inhibitor, mitochondrial
210235_s_at	0.000632	2.09e-05	4.34645	2.50132	0.240957	PPFIA1	PTPRF interacting protein alpha 1
222817_at	0.000632	2.09e-05	4.34643	2.50125	0.494005	HSD3B7	hydroxy-delta-5-steroid dehydrogenase, 3 beta- and steroid delta-isomerase 7
244419_at	0.00429	0.000303	-3.66948	0.047828	-0.507043	FRZB	frizzled-related protein
209068_at	0.000634	2.1e-05	-4.34567	2.49829	-0.348508	HNRNPDL	heterogeneous nuclear ribonucleoprotein D like
1557775_a_at	0.000634	2.1e-05	-4.34555	2.49784	-0.469712
235143_at	0.000634	2.1e-05	-4.34525	2.49664	-0.260756	SLC10A7	solute carrier family 10 member 7
203697_at	0.00826	0.000757	-3.41427	-0.782297	-0.524694	FRZB	frizzled-related protein
226575_at	0.000637	2.11e-05	-4.34392	2.49148	-0.418675	ZNF462	zinc finger protein 462
209289_at	0.000637	2.11e-05	-4.34386	2.49128	-0.422869	NFIB	nuclear factor I B
224274_at	0.011	0.00114	3.29617	-1.14822	0.596808	FSCB	fibrous sheath CABYR binding protein
219170_at	0.00739	0.000649	3.45828	-0.642954	0.620903	FSD1	fibronectin type III and SPRY domain containing 1
232990_at	0.000638	2.12e-05	-4.34315	2.48849	-0.412396	FAM104B	family with sequence similarity 104 member B
213530_at	0.000638	2.12e-05	-4.34302	2.48799	-0.203146	RAB3GAP1	RAB3 GTPase activating protein catalytic subunit 1
204948_s_at	0.00966	0.000948	3.34952	-0.984364	0.509946	FST	follistatin
219201_s_at	0.000639	2.13e-05	4.34234	2.48537	0.438847	TWSG1	twisted gastrulation BMP signaling modulator 1
238479_at	0.000639	2.13e-05	-4.34222	2.48488	-0.326842	DCUN1D5	defective in cullin neddylation 1 domain containing 5
224300_x_at	0.00139	6.31e-05	4.07705	1.48221	0.684011	FTCD	formimidoyltransferase cyclodeaminase
218518_at	0.00064	2.13e-05	-4.34137	2.48158	-0.283988	FAM13B	family with sequence similarity 13 member B
223979_x_at	0.00479	0.000352	3.629	-0.087362	0.555899	FTCD	formimidoyltransferase cyclodeaminase
231917_at	0.00064	2.14e-05	4.34106	2.48037	0.286675	GFM2	G elongation factor mitochondrial 2
220107_s_at	0.00064	2.14e-05	-4.34087	2.47966	-0.38603	ZC2HC1C	zinc finger C2HC-type containing 1C
218357_s_at	0.00064	2.14e-05	4.34079	2.47935	0.270169	TIMM8B	translocase of inner mitochondrial membrane 8 homolog B
235352_at	0.00064	2.14e-05	-4.34076	2.47921	-0.455776	MR1	major histocompatibility complex, class I-related
208969_at	0.000642	2.15e-05	4.34009	2.47664	0.230268	NDUFA9	NADH:ubiquinone oxidoreductase subunit A9
222753_s_at	0.000642	2.15e-05	4.33999	2.47625	0.380988	SPCS3	signal peptidase complex subunit 3
213937_s_at	2.1e-06	2.43e-09	6.21537	10.9751	0.518851	FTSJ1	FtsJ RNA methyltransferase homolog 1 (E. coli)
201210_at	0.000642	2.15e-05	-4.33957	2.47462	-0.19619	DDX3X	DEAD-box helicase 3, X-linked
214094_at	0.0219	0.00289	3.01238	-1.97963	0.509549	FUBP1	far upstream element binding protein 1
1563772_a_at	0.000643	2.16e-05	-4.33889	2.47198	-0.288979	LAMA3	laminin subunit alpha 3
200037_s_at	0.000646	2.17e-05	4.33756	2.46683	0.165168	CBX3	chromobox 3
212062_at	0.000649	2.18e-05	-4.33652	2.46279	-0.406714	ATP9A	ATPase phospholipid transporting 9A (putative)
205384_at	0.00169	8.25e-05	-4.00962	1.23585	-0.865078	FXYD1	FXYD domain containing ion transport regulator 1
202739_s_at	0.000652	2.19e-05	-4.33524	2.45782	-0.357388	PHKB	phosphorylase kinase regulatory subunit beta
218184_at	0.000654	2.2e-05	-4.33419	2.45376	-0.234146	TULP4	tubby like protein 4
209207_s_at	0.000654	2.2e-05	4.33383	2.45233	0.20591	LOC102724364///LOC100996517///SEC22B	vesicle-trafficking protein SEC22b-like///vesicle-trafficking protein SEC22b///SEC22 homolog B, vesicle trafficking protein (gene/pseudogene)
227291_s_at	0.000654	2.2e-05	4.33382	2.45231	0.370754	BOLA3	bolA family member 3
212494_at	0.000654	2.2e-05	-4.3336	2.45147	-0.487588	TNS2	tensin 2
218403_at	0.000654	2.2e-05	4.33359	2.45142	0.233092	TRIAP1	TP53 regulated inhibitor of apoptosis 1
238601_at	0.00066	2.22e-05	-4.33153	2.44342	-0.389465	PHKB	phosphorylase kinase regulatory subunit beta
229083_at	0.000661	2.23e-05	-4.33081	2.44063	-0.3276	HNRNPA0	heterogeneous nuclear ribonucleoprotein A0
228402_at	0.000661	2.23e-05	-4.33063	2.43996	-0.377169	ZBED3	zinc finger BED-type containing 3
227161_at	0.000662	2.24e-05	4.33023	2.43838	0.315152	NOM1	nucleolar protein with MIF4G domain 1
242593_at	0.000664	2.24e-05	-4.3295	2.43557	-0.448347
239569_at	0.0455	0.00819	-2.66745	-2.89692	-0.573178	FZD10-AS1	FZD10 antisense RNA 1 (head to head)
1558305_at	0.000664	2.24e-05	4.32937	2.43509	0.380277	GIGYF2	GRB10 interacting GYF protein 2
211433_x_at	0.000666	2.25e-05	4.32835	2.43111	0.177936	FAM214B	family with sequence similarity 214 member B
203340_s_at	0.000667	2.26e-05	4.32786	2.42922	0.293228	SLC25A12	solute carrier family 25 member 12
206670_s_at	0.0349	0.00564	2.79469	-2.57059	0.762111	GAD1	glutamate decarboxylase 1
1556645_s_at	0.000667	2.26e-05	-4.3275	2.42783	-0.346398	TNFRSF10B	TNF receptor superfamily member 10b
227724_at	0.000667	2.26e-05	4.32746	2.42767	0.431212	NUTM2B-AS1///NUTM2A-AS1	NUTM2B antisense RNA 1///NUTM2A antisense RNA 1
205670_at	0.0159	0.00186	-3.14909	-1.58763	-0.713516	GAL3ST1	galactose-3-O-sulfotransferase 1
224679_at	0.00067	2.28e-05	4.32609	2.42237	0.261983	MESDC2	mesoderm development candidate 2
204075_s_at	0.000674	2.29e-05	-4.32462	2.41669	-0.351637	CEP104	centrosomal protein 104
228452_at	0.000674	2.29e-05	-4.32427	2.41533	-0.286839	GID4	GID complex subunit 4 homolog
237817_at	0.000674	2.29e-05	4.32418	2.415	0.347593	SSR3	signal sequence receptor subunit 3
201851_at	0.000674	2.29e-05	4.32408	2.41459	0.227473	SH3GL1	SH3 domain containing GRB2 like 1, endophilin A2
229458_s_at	0.00116	5.01e-05	-4.13436	1.69437	-0.692608	GALK1	galactokinase 1
205401_at	0.000674	2.3e-05	4.3239	2.41391	0.341067	AGPS	alkylglycerone phosphate synthase
219271_at	2.47e-05	1.81e-07	5.38415	6.92078	1.43667	GALNT14	polypeptide N-acetylgalactosaminyltransferase 14
230418_s_at	0.00647	0.000539	-3.51049	-0.47557	-0.612999	GALNT16	polypeptide N-acetylgalactosaminyltransferase 16
219956_at	0.00193	9.94e-05	3.9623	1.0651	0.842036	GALNT6	polypeptide N-acetylgalactosaminyltransferase 6
212323_s_at	0.000675	2.31e-05	-4.32297	2.41031	-0.247173	VPS13D	vacuolar protein sorting 13 homolog D
235792_x_at	0.000675	2.31e-05	-4.32295	2.41021	-0.19337	PIK3C2A	phosphatidylinositol-4-phosphate 3-kinase catalytic subunit type 2 alpha
AFFX-M27830_5_at	0.000676	2.31e-05	4.32253	2.40858	0.465587
238723_at	0.000677	2.31e-05	-4.32215	2.40715	-0.410737	ATXN3	ataxin 3
204349_at	0.000678	2.32e-05	-4.32141	2.40425	-0.242352	MED7	mediator complex subunit 7
227200_at	0.000679	2.32e-05	-4.32094	2.40245	-0.21606	ETV3	ETS variant 3
217968_at	0.000679	2.33e-05	4.32066	2.40139	0.302942	TSSC1	tumor suppressing subtransferable candidate 1
224372_at	0.000679	2.33e-05	4.32064	2.40128	0.139213	ND4	NADH dehydrogenase, subunit 4 (complex I)
228303_at	0.0114	0.00118	3.2845	-1.18378	0.82762	GALNT6	polypeptide N-acetylgalactosaminyltransferase 6
224975_at	0.000681	2.34e-05	-4.31971	2.39771	-0.495552	NFIA	nuclear factor I A
213453_x_at	1.35e-09	3.66e-14	8.08714	21.4767	0.551989	GAPDH	glyceraldehyde-3-phosphate dehydrogenase
223490_s_at	0.000681	2.34e-05	4.31949	2.39686	0.342153	EXOSC3	exosome component 3
AFFX-HSAC07/X00351_M_at	0.000682	2.34e-05	4.31907	2.39522	0.271953	ACTB	actin beta
217398_x_at	1.35e-09	4.93e-14	8.0403	21.1943	0.580943	GAPDH	glyceraldehyde-3-phosphate dehydrogenase
220980_s_at	0.000683	2.35e-05	4.31852	2.39308	0.197767	ADPGK	ADP dependent glucokinase
223880_x_at	0.000684	2.35e-05	4.31803	2.3912	0.361508	TGIF2-C20orf24///C20orf24	TGIF2-C20orf24 readthrough///chromosome 20 open reading frame 24
242610_x_at	0.000684	2.36e-05	-4.31768	2.38984	-0.421101
AFFX-HUMGAPDH/M33197_M_at	5.64e-09	5.54e-13	7.65431	18.902	0.679436	GAPDH	glyceraldehyde-3-phosphate dehydrogenase
AFFX-HUMGAPDH/M33197_5_at	5.64e-09	5.73e-13	7.64886	18.87	0.850323	GAPDH	glyceraldehyde-3-phosphate dehydrogenase
223857_x_at	0.000684	2.36e-05	4.31737	2.38865	0.27196	EMC4	ER membrane protein complex subunit 4
211983_x_at	0.000685	2.36e-05	4.31688	2.38676	0.120485	ACTG1///ACTB	actin gamma 1///actin beta
217772_s_at	0.000686	2.37e-05	4.31646	2.38515	0.310941	MTCH2	mitochondrial carrier 2
205848_at	0.0139	0.00155	-3.20462	-1.42388	-0.536981	GAS2	growth arrest specific 2
212831_at	0.000686	2.37e-05	-4.31614	2.38392	-0.421895	MEGF9	multiple EGF like domains 9
238097_at	0.00349	0.000227	-3.74671	0.309502	-0.73327	GAS6-AS1	GAS6 antisense RNA 1
218486_at	0.000688	2.38e-05	-4.31539	2.38102	-0.299808	KLF11	Kruppel like factor 11
243323_s_at	0.000688	2.38e-05	-4.31532	2.38073	-0.480479	ZFHX3	zinc finger homeobox 3
238197_at	0.000131	2.06e-06	-4.87316	4.64975	-0.925126	GATA5	GATA binding protein 5
238095_at	0.0244	0.00339	-2.96132	-2.12193	-0.581418	GATA5	GATA binding protein 5
210002_at	0.000219	4.4e-06	-4.70574	3.94504	-0.777634	GATA6	GATA binding protein 6
204766_s_at	0.000693	2.4e-05	4.31284	2.37115	0.416282	NUDT1	nudix hydrolase 1
219283_at	0.000693	2.41e-05	4.31279	2.37098	0.302125	C1GALT1C1	C1GALT1 specific chaperone 1
244401_at	0.000694	2.41e-05	-4.31236	2.36932	-0.382274	LCA5	LCA5, lebercilin
218031_s_at	0.000696	2.42e-05	-4.31156	2.36624	-0.278301	FOXN3	forkhead box N3
200751_s_at	0.000697	2.42e-05	4.31101	2.36411	0.263346	HNRNPC	heterogeneous nuclear ribonucleoprotein C (C1/C2)
236723_at	0.000703	2.45e-05	-4.30882	2.35565	-0.446644
212239_at	0.000703	2.45e-05	-4.30866	2.35505	-0.409393	PIK3R1	phosphoinositide-3-kinase regulatory subunit 1
220002_at	0.000704	2.45e-05	4.3083	2.35365	0.4627	KIF26B	kinesin family member 26B
201931_at	0.000706	2.46e-05	4.30771	2.35137	0.300537	ETFA	electron transfer flavoprotein alpha subunit
238604_at	0.000706	2.46e-05	4.30736	2.35004	0.383772
202553_s_at	0.000707	2.46e-05	-4.30703	2.34875	-0.168007	SYF2	SYF2 pre-mRNA splicing factor
219815_at	0.000707	2.46e-05	4.30696	2.34847	0.406319	GAL3ST4	galactose-3-O-sulfotransferase 4
236118_at	0.00115	4.91e-05	-4.13959	1.71385	-0.723175	GATA6-AS1	GATA6 antisense RNA 1 (head to head)
203178_at	0.000223	4.54e-06	-4.6984	3.91461	-0.718555	GATM	glycine amidinotransferase
211714_x_at	0.000716	2.5e-05	4.30351	2.33518	0.370226	TUBB	tubulin beta class I
216733_s_at	0.00435	0.000308	-3.66484	0.032262	-0.539343	GATM	glycine amidinotransferase
213699_s_at	0.000726	2.54e-05	4.29977	2.32078	0.118252	YWHAQ	tyrosine 3-monooxygenase/tryptophan 5-monooxygenase activation protein theta
231578_at	0.00125	5.51e-05	4.11076	1.60669	0.669904	GBP1	guanylate binding protein 1
240037_at	0.000726	2.54e-05	4.29959	2.32008	0.332186	ITPRIPL1	inositol 1,4,5-trisphosphate receptor interacting protein-like 1
225508_at	0.000726	2.54e-05	4.29929	2.31892	0.256185	KIAA1468	KIAA1468
210565_at	0.000402	1.05e-05	-4.50813	3.13925	-0.525374	GCGR	glucagon receptor
214527_s_at	0.000728	2.55e-05	4.2984	2.31549	0.310835	PQBP1	polyglutamine binding protein 1
228346_at	0.000728	2.56e-05	-4.29832	2.3152	-0.435531	ZNF844	zinc finger protein 844
212169_at	0.000729	2.56e-05	4.29811	2.31438	0.249189	FKBP9	FK506 binding protein 9
213614_x_at	0.00073	2.56e-05	4.29753	2.31215	0.118959	EEF1A1	eukaryotic translation elongation factor 1 alpha 1
AFFX-M27830_M_at	0.00073	2.56e-05	4.29747	2.31194	0.22281
206159_at	0.000137	2.2e-06	-4.85909	4.58977	-1.11017	GDF10	growth differentiation factor 10
230483_at	0.000734	2.58e-05	4.29578	2.30541	0.446861
229868_s_at	0.00317	0.000198	-3.78339	0.435454	-0.691167	GDF15	growth differentiation factor 15
221577_x_at	0.00335	0.000214	-3.76237	0.363125	-0.826121	GDF15	growth differentiation factor 15
202390_s_at	0.000741	2.61e-05	-4.2931	2.29514	-0.324467	HTT	huntingtin
214238_at	0.00034	8.26e-06	-4.56297	3.36001	-0.814347	GDF7	growth differentiation factor 7
203540_at	0.00246	0.000139	3.87527	0.755627	0.835451	GFAP	glial fibrillary acidic protein
200925_at	0.000741	2.62e-05	4.29271	2.29363	0.326913	COX6A1	cytochrome c oxidase subunit 6A1
224746_at	0.000741	2.62e-05	-4.29261	2.29325	-0.431537	KIAA1522	KIAA1522
227550_at	1.14e-06	1.1e-09	-6.3591	11.718	-1.79389	GFRA1	GDNF family receptor alpha 1
205696_s_at	1.84e-05	1.16e-07	-5.47395	7.33791	-0.868979	GFRA1	GDNF family receptor alpha 1
226437_at	0.000744	2.63e-05	4.29146	2.28881	0.327675	YIF1B	Yip1 interacting factor homolog B, membrane trafficking protein
228569_at	0.000744	2.63e-05	-4.29135	2.2884	-0.309227	PAPOLA	poly(A) polymerase alpha
230163_at	5.31e-05	5.51e-07	-5.15515	5.88107	-0.666264	GFRA1	GDNF family receptor alpha 1
218647_s_at	0.000746	2.64e-05	-4.29044	2.2849	-0.228609	YRDC	yrdC N6-threonylcarbamoyltransferase domain containing
216520_s_at	0.000749	2.65e-05	4.28928	2.28044	0.150056	LOC101928826///TPT1	uncharacterized LOC101928826///tumor protein, translationally-controlled 1
222834_s_at	0.000749	2.65e-05	-4.28922	2.2802	-0.296064	GNG12	G protein subunit gamma 12
229936_at	0.00536	0.000415	-3.58335	-0.238264	-1.20223	GFRA3	GDNF family receptor alpha 3
211417_x_at	0.00195	0.000101	-3.95922	1.05405	-0.6643	GGT2///GGTLC1///GGTLC2///GGT1	gamma-glutamyltransferase 2///gamma-glutamyltransferase light chain 1///gamma-glutamyltransferase light chain 2///gamma-glutamyltransferase 1
215397_x_at	0.000751	2.66e-05	-4.28823	2.27638	-0.366972
1562144_at	0.000751	2.67e-05	-4.28792	2.27522	-0.365262
208284_x_at	0.0023	0.000126	-3.90185	0.849527	-0.595789	GGT2///GGTLC1///GGTLC2///GGT1	gamma-glutamyltransferase 2///gamma-glutamyltransferase light chain 1///gamma-glutamyltransferase light chain 2///gamma-glutamyltransferase 1
209919_x_at	0.00267	0.000155	-3.84745	0.657984	-0.610588	GGT2///GGTLC1///GGTLC2///GGT1	gamma-glutamyltransferase 2///gamma-glutamyltransferase light chain 1///gamma-glutamyltransferase light chain 2///gamma-glutamyltransferase 1
207131_x_at	0.0032	0.000201	-3.77991	0.423431	-0.555558	GGT2///GGTLC1///GGTLC2///GGT1	gamma-glutamyltransferase 2///gamma-glutamyltransferase light chain 1///gamma-glutamyltransferase light chain 2///gamma-glutamyltransferase 1
236225_at	0.00475	0.000348	-3.63203	-0.07729	-0.678954	GGT6	gamma-glutamyltransferase 6
240125_at	0.00076	2.71e-05	-4.28455	2.26225	-0.388103
211416_x_at	0.000422	1.13e-05	-4.48976	3.06578	-0.860519	GGTLC1	gamma-glutamyltransferase light chain 1
226185_at	0.000761	2.71e-05	-4.2841	2.26054	-0.445478	CDS1	CDP-diacylglycerol synthase 1
206102_at	0.0116	0.00122	3.27564	-1.21067	0.504967	GINS1	GINS complex subunit 1
221521_s_at	0.00075	2.66e-05	4.28861	2.27786	0.637775	GINS2	GINS complex subunit 2
40149_at	0.000764	2.73e-05	-4.28267	2.25506	-0.276414	SH2B1	SH2B adaptor protein 1
1553575_at	0.000764	2.73e-05	-4.28255	2.25459	-0.213983	ND6	NADH dehydrogenase, subunit 6 (complex I)
211767_at	0.00163	7.9e-05	4.02082	1.27653	0.794903	GINS4	GINS complex subunit 4
226402_at	0.000766	2.74e-05	-4.28172	2.25142	-0.383691	CYP2U1	cytochrome P450 family 2 subfamily U member 1
236548_at	0.000584	1.85e-05	-4.37543	2.61424	-0.795278	GIPC2	GIPC PDZ domain containing family member 2
213100_at	0.000772	2.76e-05	4.27941	2.24253	0.374951	UNC5B	unc-5 netrin receptor B
225468_at	0.000772	2.77e-05	4.27927	2.24201	0.370467	PATL1	PAT1 homolog 1, processing body mRNA decay factor
1564494_s_at	0.000772	2.77e-05	4.27919	2.24171	0.436616	P4HB	prolyl 4-hydroxylase subunit beta
216242_x_at	0.000772	2.77e-05	4.27885	2.24042	0.302929	UPK3BL///POLR2J3///POLR2J2///POLR2J4///POLR2J	uroplakin 3B-like///RNA polymerase II subunit J3///RNA polymerase II subunit J2///RNA polymerase II subunit J4, pseudogene///RNA polymerase II subunit J
1570569_at	0.000772	2.77e-05	-4.27876	2.24005	-0.213325
219970_at	0.0033	0.00021	-3.76829	0.383455	-0.634935	GIPC2	GIPC PDZ domain containing family member 2
204973_at	0.0484	0.00892	-2.63775	-2.97104	-0.668863	GJB1	gap junction protein beta 1
206144_at	0.000772	2.77e-05	-4.27855	2.23927	-0.451649	MAGI1	membrane associated guanylate kinase, WW and PDZ domain containing 1
224336_s_at	0.000773	2.78e-05	-4.27832	2.23838	-0.320179	DUSP16	dual specificity phosphatase 16
204028_s_at	0.000773	2.78e-05	-4.27817	2.2378	-0.25429	RABGAP1	RAB GTPase activating protein 1
223278_at	1.62e-05	9.19e-08	5.52087	7.55799	1.60453	GJB2	gap junction protein beta 2
222119_s_at	0.000774	2.79e-05	-4.27743	2.23496	-0.173084	FBXO11	F-box protein 11
205490_x_at	0.00655	0.000549	3.50571	-0.490986	1.07115	GJB3	gap junction protein beta 3
206156_at	0.0384	0.00643	2.75029	-2.68608	0.674916	GJB5	gap junction protein beta 5
226037_s_at	0.000776	2.8e-05	-4.27643	2.23113	-0.356086	TAF9B	TATA-box binding protein associated factor 9b
243878_at	0.000776	2.8e-05	-4.27625	2.23043	-0.430431
204773_at	0.000776	2.8e-05	-4.27618	2.23018	-0.395242	IL11RA	interleukin 11 receptor subunit alpha
231771_at	0.0504	0.00944	2.61785	-3.02027	1.18881	GJB6	gap junction protein beta 6
238222_at	0.0208	0.00269	-3.03507	-1.91566	-0.841314	GKN2	gastrokine 2
225706_at	0.00159	7.61e-05	-4.02999	1.30991	-0.520838	GLCCI1	glucocorticoid induced 1
222756_s_at	0.000786	2.84e-05	-4.27266	2.21667	-0.318875	ARRB1	arrestin beta 1
208453_s_at	0.000786	2.85e-05	4.27246	2.21592	0.277288	XPNPEP1	X-prolyl aminopeptidase 1
230360_at	0.0447	0.00798	-2.67647	-2.87424	-0.511847	GLDN	gliomedin
231112_at	0.00079	2.86e-05	-4.27127	2.21136	-0.410616	SNRPE	small nuclear ribonucleoprotein polypeptide E
241034_at	0.0433	0.00764	-2.69149	-2.83634	-0.589545	GLS	glutaminase
219955_at	0.000792	2.87e-05	-4.27024	2.20742	-0.4287	L1TD1	LINE1 type transposase domain containing 1
205531_s_at	0.00171	8.45e-05	-4.00383	1.21488	-0.980783	GLS2	glutaminase 2
1564706_s_at	0.00965	0.000947	-3.34986	-0.983301	-0.869148	GLS2	glutaminase 2
210447_at	0.0184	0.00228	-3.08605	-1.77037	-0.552344	GLUD2	glutamate dehydrogenase 2
201322_at	0.000793	2.88e-05	4.26944	2.20436	0.223241	ATP5B	ATP synthase, H+ transporting, mitochondrial F1 complex, beta polypeptide
220890_s_at	0.000794	2.88e-05	4.26919	2.20342	0.204692	APOLD1///DDX47	apolipoprotein L domain containing 1///DEAD-box helicase 47
212631_at	0.000796	2.9e-05	-4.26811	2.19928	-0.268995	STX7	syntaxin 7
215891_s_at	0.0312	0.00484	2.84579	-2.43556	0.614524	GM2A	GM2 ganglioside activator
1554346_at	0.00174	8.63e-05	3.99843	1.19533	0.667695	GNB5	G protein subunit beta 5
227108_at	0.000798	2.91e-05	-4.26726	2.196	-0.376501	STARD9	StAR related lipid transfer domain containing 9
218306_s_at	0.000801	2.92e-05	-4.26645	2.19293	-0.248391	HERC1	HECT and RLD domain containing E3 ubiquitin protein ligase family member 1
1555765_a_at	0.00653	0.000546	3.50691	-0.487134	0.735274	GNG4	G protein subunit gamma 4
209509_s_at	0.000803	2.93e-05	4.26556	2.18951	0.289453	DPAGT1	dolichyl-phosphate N-acetylglucosaminephosphotransferase 1
236457_at	0.000803	2.93e-05	-4.26535	2.18873	-0.38397	GTDC1	glycosyltransferase like domain containing 1
208473_s_at	0.046	0.00831	2.66237	-2.90964	0.589163	GP2	glycoprotein 2
219099_at	0.000804	2.94e-05	4.26472	2.1863	0.340431	TIGAR	TP53 induced glycolysis regulatory phosphatase
230490_x_at	0.000806	2.94e-05	-4.26417	2.18419	-0.271922	RSU1	Ras suppressor protein 1
238719_at	0.000807	2.95e-05	-4.26382	2.18286	-0.329622	PPP2CA	protein phosphatase 2 catalytic subunit alpha
[truncated: 52,676 more rows]

## Sheet: GSE75037
ID	adj.P.Val	P.Value	t	B	logFC	Gene.symbol	Gene.title
ILMN_1673639	0.1083	5.3e-06	-4.87	2.9022	-1.09	ABI3BP	ABI family member 3 binding protein
ILMN_1802096	0.4622	0.00340935	-3.01	-1.9266	-0.508	ABTB1	ankyrin repeat and BTB domain containing 1
ILMN_2148944	0.4501	0.00182815	-3.22	-1.46696	-0.678	ADCY4	adenylate cyclase 4
ILMN_1702858	0.5241	0.00956839	-2.65	-2.67954	-0.593	ADHFE1	alcohol dehydrogenase, iron containing 1
ILMN_1670870	0.4576	0.00206905	-3.18	-1.55848	-0.721	ALCAM	activated leukocyte cell adhesion molecule
ILMN_1680996	0.4479	0.00163024	-3.26	-1.38215	-0.752	ALOX5	arachidonate 5-lipoxygenase
ILMN_2073157	0.5115	0.00811699	-2.71	-2.56037	-0.863	AMY2B	amylase, alpha 2B (pancreatic)
ILMN_1755721	0.4888	0.00645312	-2.79	-2.39359	-0.648	ANXA9	annexin A9
ILMN_1782086	0.4622	0.00280312	-3.08	-1.78252	-0.655	AOC3	amine oxidase, copper containing 3
ILMN_1811392	0.3876	0.00062504	-3.56	-0.669804	-0.679	ARHGAP45	Rho GTPase activating protein 45
ILMN_2048700	0.4437	0.00147231	3.29	-1.30667	0.832	ATAD2	ATPase family, AAA domain containing 2
ILMN_1737833	0.5168	0.00829103	2.7	-2.57576	0.594	ATN1	atrophin 1
ILMN_1783956	0.3989	0.00072426	-3.51	-0.779554	-0.545	ATP8B4	ATPase phospholipid transporting 8B4 (putative)
ILMN_1787280	0.1969	1.614e-05	4.58	2.06795	1.04	AUNIP	aurora kinase A and ninein interacting protein
ILMN_1684217	0.4453	0.00154767	3.27	-1.34366	0.975	AURKB	aurora kinase B
ILMN_1691410	0.4018	0.0008315	-3.47	-0.882338	-1.39	BAMBI	BMP and activin membrane bound inhibitor
ILMN_2234697	0.4576	0.00242052	3.13	-1.67433	1.05	BEX1	brain expressed X-linked 1
ILMN_1803124	0.4232	0.00122524	3.35	-1.17043	0.778	BIRC5	baculoviral IAP repeat containing 5
ILMN_1761486	0.5222	0.00889244	2.68	-2.62651	0.539	BORA	bora, aurora kinase A activator
ILMN_1662026	0.3821	0.0002508	-3.83	0.012061	-0.795	BTK	Bruton tyrosine kinase
ILMN_1783682	0.5175	0.00832033	-2.7	-2.57831	-0.543	C17orf82	chromosome 17 open reading frame 82
ILMN_1907042	0.3846	0.00050637	-3.62	-0.51282	-0.768	C1orf132	chromosome 1 open reading frame 132
ILMN_1754894	0.4622	0.00361774	-2.99	-1.97019	-0.569	C1orf162	chromosome 1 open reading frame 162
ILMN_1687848	0.4795	0.00493902	-2.89	-2.19839	-1.04	C7	complement component 7
ILMN_2365023	0.5222	0.00869744	-2.69	-2.61045	-1.1	C9orf24	chromosome 9 open reading frame 24
ILMN_2109371	0.5241	0.00927056	2.66	-2.65666	0.645	CALCB	calcitonin related polypeptide beta
ILMN_2360730	0.4622	0.00319745	-3.04	-1.87942	-0.682	CAV2	caveolin 2
ILMN_1790625	0.4501	0.00185304	3.22	-1.47696	0.565	CBX3	chromobox 3
ILMN_2160476	0.5104	0.00778152	-2.73	-2.52973	-0.888	CCL22	C-C motif chemokine ligand 22
ILMN_1786125	0.4453	0.00151496	3.28	-1.32783	0.834	CCNA2	cyclin A2
ILMN_1801939	0.4501	0.0017993	3.22	-1.45519	0.916	CCNB2	cyclin B2
ILMN_1714118	0.4576	0.00202348	-3.19	-1.54202	-0.881	CD164L2	CD164 molecule like 2
ILMN_1723520	0.4453	0.00156013	-3.27	-1.3496	-1.51	CD1A	CD1a molecule
ILMN_1726230	0.4271	0.00128654	-3.33	-1.20666	-0.891	CD1B	CD1b molecule
ILMN_1654210	0.3821	0.00017135	-3.93	0.297126	-1.07	CD1C	CD1c molecule
ILMN_2335754	0.3099	7.005e-05	-4.19	0.967352	-1.4	CD1E	CD1e molecule
ILMN_1718754	0.3099	5.128e-05	-4.27	1.20122	-1.47	CD207	CD207 molecule
ILMN_1747622	0.5091	0.00741243	-2.74	-2.49443	-0.733	CD33	CD33 molecule
ILMN_2208903	0.499	0.00707364	-2.76	-2.46042	-0.664	CD52	CD52 molecule
ILMN_1800540	0.5202	0.0084955	-2.7	-2.59342	-0.653	CD55	CD55 molecule (Cromer blood group)
ILMN_2188333	0.4622	0.00334457	-3.02	-1.9125	-0.798	CD69	CD69 molecule
ILMN_2328666	0.4456	0.00157059	-3.27	-1.35455	-0.698	CD83	CD83 molecule
ILMN_1780582	0.5094	0.00761381	-2.74	-2.51391	-0.519	CD83	CD83 molecule
ILMN_1700681	0.4622	0.00351348	-3	-1.94871	-0.524	CD99L2	CD99 molecule like 2
ILMN_1711005	0.4576	0.0025688	3.11	-1.71819	0.783	CDC25A	cell division cycle 25A
ILMN_2294431	0.3876	0.00060302	3.57	-0.643067	0.521	CDC25C	cell division cycle 25C
ILMN_2407619	0.4479	0.00167035	3.25	-1.40015	0.717	CDC25C	cell division cycle 25C
ILMN_1725260	0.4871	0.00601041	2.82	-2.34179	0.709	CDC25C	cell division cycle 25C
ILMN_1670238	0.4501	0.00184253	3.22	-1.47276	0.892	CDC45	cell division cycle 45
ILMN_1737728	0.3821	0.0002112	3.88	0.140635	1.18	CDCA3	cell division cycle associated 3
ILMN_1684045	0.4501	0.00174301	3.24	-1.43167	0.528	CDCA4	cell division cycle associated 4
ILMN_1683450	0.4501	0.00169183	3.24	-1.40961	0.847	CDCA5	cell division cycle associated 5
ILMN_1709294	0.3973	0.00065529	3.54	-0.705013	0.778	CDCA8	cell division cycle associated 8
ILMN_1747911	0.4232	0.00116345	3.36	-1.13202	0.934	CDK1	cyclin dependent kinase 1
ILMN_1710428	0.4576	0.00244502	3.12	-1.68176	0.58	CDK1	cyclin dependent kinase 1
ILMN_1784602	0.477	0.00458618	-2.91	-2.14415	-0.594	CDKN1A	cyclin dependent kinase inhibitor 1A
ILMN_1666305	0.5241	0.00951568	2.65	-2.67554	0.84	CDKN3	cyclin dependent kinase inhibitor 3
ILMN_1651237	0.3989	0.00078859	3.48	-0.842908	0.96	CDT1	chromatin licensing and DNA replication factor 1
ILMN_2392472	0.4977	0.007017	2.76	-2.45457	0.57	CENPA	centromere protein A
ILMN_1716279	0.5115	0.00793321	2.72	-2.54375	0.588	CENPE	centromere protein E
ILMN_1664516	0.5052	0.00727539	2.75	-2.48087	0.785	CENPF	centromere protein F
ILMN_2368721	0.4647	0.00382354	2.98	-2.01082	0.782	CENPM	centromere protein M
ILMN_1668814	0.4805	0.00572232	2.84	-2.30595	0.742	CENPM	centromere protein M
ILMN_1720526	0.3876	0.00060095	3.57	-0.640508	0.779	CENPN	centromere protein N
ILMN_1787477	0.3876	0.00055981	3.59	-0.587634	0.729	CENPO	centromere protein O
ILMN_1777190	0.4181	0.00099621	-3.41	-1.01673	-0.821	CFD	complement factor D
ILMN_1727815	0.4105	0.00091824	-3.44	-0.956151	-0.93	CFI	complement factor I
ILMN_1730229	0.3821	0.00034576	-3.73	-0.22797	-0.697	CGNL1	cingulin like 1
ILMN_1664630	0.4622	0.00366541	2.99	-1.97981	0.718	CHEK1	checkpoint kinase 1
ILMN_2395240	0.4622	0.00348242	3.01	-1.94219	0.702	CHEK2	checkpoint kinase 2
ILMN_1773363	0.4622	0.00282806	-3.08	-1.78905	-0.656	CIITA	class II major histocompatibility complex transactivator
ILMN_1674411	0.4576	0.0020961	3.18	-1.56808	0.618	CKAP2	cytoskeleton associated protein 2
ILMN_1719256	0.4232	0.00111023	3.38	-1.09725	0.649	CKS1B	CDC28 protein kinase regulatory subunit 1B
ILMN_2041046	0.4271	0.00127193	3.34	-1.19818	0.549	CKS1B	CDC28 protein kinase regulatory subunit 1B
ILMN_2072296	0.4576	0.00208253	3.18	-1.56328	0.633	CKS2	CDC28 protein kinase regulatory subunit 2
ILMN_1756326	0.4622	0.00345283	3.01	-1.93591	0.787	CKS2	CDC28 protein kinase regulatory subunit 2
ILMN_1725338	0.4576	0.00249704	-3.12	-1.69729	-0.732	CLDN23	claudin 23
ILMN_2415303	0.4576	0.00232522	-3.14	-1.64469	-0.77	CLEC10A	C-type lectin domain family 10 member A
ILMN_2399363	0.4887	0.00638834	-2.8	-2.38624	-0.616	CLEC4A	C-type lectin domain family 4 member A
ILMN_1796288	0.4802	0.00561546	2.84	-2.29219	0.501	COL5A3	collagen type V alpha 3 chain
ILMN_1658040	0.4622	0.00283545	3.08	-1.79097	1.44	CRABP1	cellular retinoic acid binding protein 1
ILMN_1720484	0.3876	0.00059029	-3.57	-0.627172	-0.668	CRTAP	cartilage associated protein
ILMN_1661861	0.4887	0.00632986	-2.8	-2.37954	-0.815	CSF2	colony stimulating factor 2
ILMN_1763487	0.5183	0.00843306	-2.7	-2.58807	-0.632	CTLA4	cytotoxic T-lymphocyte associated protein 4
ILMN_2393712	0.4755	0.00446384	-2.92	-2.12435	-0.513	CTTN	cortactin
ILMN_1704985	0.4647	0.0038379	-2.97	-2.01357	-0.726	CYP27A1	cytochrome P450 family 27 subfamily A member 1
ILMN_2097259	0.4576	0.00247127	-3.12	-1.68964	-0.557	CYP2U1	cytochrome P450 family 2 subfamily U member 1
ILMN_1697433	0.4802	0.00558488	-2.84	-2.28821	-0.612	CYP46A1	cytochrome P450 family 46 subfamily A member 1
ILMN_1757631	0.5094	0.00770733	2.73	-2.52277	0.523	DBNDD1	dysbindin domain containing 1
ILMN_1862521	0.4622	0.00331264	-3.02	-1.90545	-0.678	DENND1B	DENN domain containing 1B
ILMN_1744308	0.4576	0.00224722	3.15	-1.6195	0.514	DHX33	DEAH-box helicase 33
ILMN_1695226	0.3821	0.00036201	3.72	-0.262278	0.576	DIAPH3	diaphanous related formin 3
ILMN_1685052	0.4622	0.0028036	-3.08	-1.78265	-0.582	DNAH1	dynein axonemal heavy chain 1
ILMN_1791211	0.477	0.00463648	-2.91	-2.15214	-0.646	DOK2	docking protein 2
ILMN_1708107	0.5094	0.00769872	-2.73	-2.52196	-0.832	DPT	dermatopontin
ILMN_1672503	0.4576	0.0024682	-3.12	-1.68872	-0.531	DPYSL2	dihydropyrimidinase like 2
ILMN_1652549	0.4871	0.00607675	2.82	-2.34979	0.579	DTNA	dystrobrevin alpha
ILMN_1777233	0.4687	0.00409922	2.95	-2.06189	0.685	E2F2	E2F transcription factor 2
ILMN_1671568	0.4802	0.00563856	-2.84	-2.29519	-0.621	ECHDC2	enoyl-CoA hydratase domain containing 2
ILMN_1726138	0.4622	0.00333852	3.02	-1.91117	0.582	EI24	EI24, autophagy associated transmembrane protein
ILMN_1706635	0.5222	0.0086346	-2.69	-2.60519	-0.656	ELANE	elastase, neutrophil expressed
ILMN_1660727	0.3989	0.00072158	-3.51	-0.776794	-0.927	ENPP5	ectonucleotide pyrophosphatase/phosphodiesterase 5 (putative)
ILMN_1668092	0.4901	0.00665853	-2.78	-2.41641	-0.67	ESAM	endothelial cell adhesion molecule
ILMN_1763452	0.5175	0.00834848	-2.7	-2.58076	-0.674	EVI2B	ecotropic viral integration site 2B
ILMN_1679158	0.477	0.00454949	-2.92	-2.13827	-0.635	FAAH2	fatty acid amide hydrolase 2
ILMN_1666449	0.526	0.00987432	-2.64	-2.70229	-0.503	FAM134C	family with sequence similarity 134 member C
ILMN_1754538	0.4294	0.00131971	3.32	-1.22554	0.53	FAM213A	family with sequence similarity 213 member A
ILMN_2180371	0.4576	0.00211545	3.17	-1.57487	0.572	FAM216A	family with sequence similarity 216 member A
ILMN_1772446	0.4687	0.00420451	2.94	-2.08049	0.616	FAM222A	family with sequence similarity 222 member A
ILMN_1781943	0.3821	0.00022009	3.86	0.109785	1.12	FAM83D	family with sequence similarity 83 member D
ILMN_1658301	0.4888	0.00649279	-2.79	-2.39805	-0.716	FAM83E	family with sequence similarity 83 member E
ILMN_1777322	0.4576	0.00256112	3.11	-1.71598	0.651	FAM91A1	family with sequence similarity 91 member A1
ILMN_1688423	0.0617	1.26e-06	-5.22	3.97389	-1.99	FCER1A	Fc fragment of IgE receptor Ia
ILMN_2302757	0.4622	0.00331779	-3.02	-1.90659	-1.33	FCGBP	Fc fragment of IgG binding protein
ILMN_1718984	0.4622	0.00338061	-3.02	-1.92038	-1.09	FCGBP	Fc fragment of IgG binding protein
ILMN_2289849	0.5094	0.00770219	-2.73	-2.52229	-0.683	FCGR2A	Fc fragment of IgG receptor IIa
ILMN_1804174	0.3821	0.00036689	-3.71	-0.27228	-0.785	FCGR2B	Fc fragment of IgG receptor IIb
ILMN_2382403	0.477	0.00459547	-2.91	-2.14563	-0.514	FCGR2B	Fc fragment of IgG receptor IIb
ILMN_1755834	0.477	0.00482789	2.9	-2.18174	0.648	FEN1	flap structure-specific endonuclease 1
ILMN_1661733	0.5222	0.00878779	-2.68	-2.61793	-1.18	FOLR1	folate receptor 1
ILMN_2085441	0.3821	0.00028753	-3.79	-0.090143	-0.747	FOXD4L1	forkhead box D4-like 1
ILMN_1781867	0.3821	0.00031841	-3.76	-0.16639	-0.671	FOXD4L1	forkhead box D4-like 1
ILMN_2344971	0.3662	0.00013507	4	0.475271	1.34	FOXM1	forkhead box M1
ILMN_1716400	0.3876	0.00058031	3.58	-0.614451	0.969	FOXM1	forkhead box M1
ILMN_1716246	0.4952	0.00689444	-2.77	-2.44175	-0.536	FRZB	frizzled-related protein
ILMN_1682015	0.4734	0.00443305	2.93	-2.11928	1.2	GAL	galanin and GMAP prepropeptide
ILMN_1794552	0.3662	9.794e-05	4.09	0.716079	0.623	GAP43	growth associated protein 43
ILMN_2364088	0.477	0.00481605	-2.9	-2.17995	-0.517	GEMIN8	gem nuclear organelle associated protein 8
ILMN_1681754	0.4802	0.00502512	2.88	-2.21103	0.866	GGH	gamma-glutamyl hydrolase
ILMN_1809590	0.4952	0.0068869	2.77	-2.44096	0.681	GINS2	GINS complex subunit 2
ILMN_1771962	0.5253	0.00981656	2.64	-2.69805	0.524	GLI3	GLI family zinc finger 3
ILMN_1735438	0.4622	0.00357327	3	-1.96111	0.629	GPM6B	glycoprotein M6B
ILMN_2168217	0.4622	0.00300512	-3.06	-1.83377	-0.799	GPR183	G protein-coupled receptor 183
ILMN_2232121	0.5241	0.00911363	-2.67	-2.6443	-0.55	GPR65	G protein-coupled receptor 65
ILMN_1761176	0.4871	0.00602266	-2.82	-2.34327	-0.636	GRIPAP1	GRIP1 associated protein 1
ILMN_1772064	0.4714	0.00439458	-2.93	-2.11289	-0.71	GSAP	gamma-secretase activating protein
ILMN_1785756	0.3821	0.00018322	3.92	0.24699	0.569	H2AFX	H2A histone family member X
ILMN_1721136	0.4437	0.00147595	-3.29	-1.3085	-0.563	H6PD	hexose-6-phosphate dehydrogenase/glucose 1-dehydrogenase
ILMN_1791771	0.4632	0.00370498	-2.99	-1.98769	-0.639	HCK	HCK proto-oncogene, Src family tyrosine kinase
ILMN_1684690	0.4795	0.00496051	-2.89	-2.20157	-0.546	HDAC11	histone deacetylase 11
ILMN_1792323	0.4576	0.00201727	-3.19	-1.53975	-0.893	HDC	histidine decarboxylase
ILMN_1702265	0.3821	0.00018324	-3.92	0.246906	-0.576	HDHD2	haloacid dehalogenase like hydrolase domain containing 2
ILMN_1741180	0.4635	0.00373499	-2.98	-1.99361	-0.936	HEXDC	hexosaminidase D
ILMN_1693853	0.4802	0.00538634	-2.86	-2.26177	-0.651	HHAT	hedgehog acyltransferase
ILMN_1703906	0.5115	0.00798261	2.72	-2.54825	0.779	HJURP	Holliday junction recognition protein
ILMN_1661266	0.4479	0.00162467	-3.26	-1.37962	-1.28	HLA-DQB1	major histocompatibility complex, class II, DQ beta 1
ILMN_2311537	0.4576	0.00256942	3.11	-1.71836	0.713	HMGA1	high mobility group AT-hook 1
ILMN_1781942	0.4687	0.00423604	2.94	-2.08597	0.801	HMMR	hyaluronan mediated motility receptor
ILMN_2409220	0.4802	0.00515546	2.87	-2.22976	0.816	HMMR	hyaluronan mediated motility receptor
ILMN_1760647	0.4887	0.00620815	2.81	-2.36539	0.631	HOXA3	homeobox A3
ILMN_1677018	0.4437	0.00144755	3.29	-1.2941	0.749	HOXA4	homeobox A4
ILMN_1735764	0.477	0.00471785	-2.9	-2.16487	-0.762	HTR2B	5-hydroxytryptamine receptor 2B
ILMN_1812226	0.477	0.00475738	-2.9	-2.17098	-0.786	ICAM1	intercellular adhesion molecule 1
ILMN_1700584	0.4576	0.00224166	-3.15	-1.61767	-0.588	IER2	immediate early response 2
ILMN_1811636	0.4576	0.00201555	-3.19	-1.53912	-0.798	IFT57	intraflagellar transport 57
ILMN_1684349	0.4802	0.00530437	-2.86	-2.25057	-0.772	IL2RB	interleukin 2 receptor subunit beta
ILMN_1749612	0.3821	0.00028845	3.78	-0.09254	0.59	IMMP1L	inner mitochondrial membrane peptidase subunit 1
ILMN_2355738	0.4622	0.00344091	3.01	-1.93337	0.659	INCENP	inner centromere protein
ILMN_1813117	0.5115	0.00802487	-2.72	-2.55208	-0.743	ITGA9	integrin subunit alpha 9
ILMN_1654396	0.4687	0.00428546	-2.94	-2.09447	-0.624	ITGB2	integrin subunit beta 2
ILMN_1778723	0.4663	0.00400214	-2.96	-2.04432	-0.645	JAML	junction adhesion molecule like
ILMN_1744897	0.4576	0.00230284	-3.14	-1.63755	-0.799	KCNN3	potassium calcium-activated channel subfamily N member 3
ILMN_1712505	0.4687	0.00412378	2.95	-2.06627	0.518	KDELC1	KDEL motif containing 1
ILMN_2158003	0.4802	0.00513574	-2.87	-2.22695	-0.815	KIAA1683	KIAA1683
ILMN_1794539	0.4479	0.00166238	3.25	-1.39661	0.782	KIF11	kinesin family member 11
ILMN_2143155	0.4622	0.00330024	3.03	-1.90269	0.808	KIF11	kinesin family member 11
ILMN_1753063	0.4576	0.00249941	3.12	-1.69799	0.794	KIF15	kinesin family member 15
ILMN_1695658	0.4622	0.00332922	3.02	-1.90912	0.845	KIF20A	kinesin family member 20A
ILMN_1811472	0.4232	0.00112939	3.37	-1.10995	0.873	KIF23	kinesin family member 23
ILMN_1694126	0.4622	0.00293027	3.07	-1.8152	0.714	KIF24	kinesin family member 24
ILMN_1735930	0.4887	0.00634627	-2.8	-2.38143	-0.529	KLF2	Kruppel like factor 2
ILMN_2064860	0.3989	0.00070411	3.52	-0.758545	1.16	LGALS7B	galectin 7B
ILMN_1825186	0.5222	0.00877532	2.68	-2.61691	0.584	LINC01252	long intergenic non-protein coding RNA 1252
ILMN_1846306	0.5241	0.00957049	-2.65	-2.67969	-0.81	LOC105379362	uncharacterized LOC105379362
ILMN_1764029	0.3876	0.00057367	-3.58	-0.605875	-0.509	LOC339059	uncharacterized LOC339059
ILMN_1778890	0.4576	0.00201796	3.19	-1.54001	0.508	LRR1	leucine rich repeat protein 1
ILMN_2314244	0.5091	0.00745812	-2.74	-2.4989	-0.582	LRRC23	leucine rich repeat containing 23
ILMN_1774389	0.4622	0.00284895	-3.07	-1.79447	-0.827	LRRC36	leucine rich repeat containing 36
ILMN_1669722	0.5222	0.00862929	2.69	-2.60475	0.5	LRRC61	leucine rich repeat containing 61
ILMN_2376204	0.3821	0.00044339	-3.66	-0.413707	-1.03	LTB	lymphotoxin beta
ILMN_2376205	0.4622	0.0027187	-3.09	-1.75999	-0.8	LTB	lymphotoxin beta
ILMN_2358074	0.3821	0.00028557	3.79	-0.085022	0.51	MAD1L1	MAD1 mitotic arrest deficient like 1
ILMN_1777564	0.4622	0.00287298	3.07	-1.80066	0.955	MAD2L1	MAD2 mitotic arrest deficient-like 1 (yeast)
ILMN_2241627	0.477	0.00458936	2.91	-2.14466	0.687	MAGEC1	MAGE family member C1
ILMN_1720041	0.4888	0.00651176	2.79	-2.40018	0.535	MAGEC1	MAGE family member C1
ILMN_2205032	0.4895	0.00657531	-2.79	-2.40725	-0.621	MAGEE1	MAGE family member E1
ILMN_1727360	0.5222	0.00889887	-2.68	-2.62703	-0.707	MAOB	monoamine oxidase B
ILMN_1797189	0.4802	0.00529074	-2.86	-2.24869	-0.525	MAP3K12	mitogen-activated protein kinase kinase kinase 12
ILMN_1665943	0.4887	0.00639798	-2.8	-2.38734	-0.624	MAP4K1	mitogen-activated protein kinase kinase kinase kinase 1
ILMN_1774132	0.4647	0.00378586	-2.98	-2.00355	-0.578	MAP6	microtubule associated protein 6
ILMN_2131493	0.4576	0.00213178	3.17	-1.58055	0.586	MAVS	mitochondrial antiviral signaling protein
ILMN_2409793	0.4622	0.00363691	2.99	-1.97407	0.732	MAZ	MYC associated zinc finger protein
ILMN_1762713	0.5241	0.00945398	-2.66	-2.67083	-1.02	MCEMP1	mast cell expressed membrane protein 1
ILMN_2413898	0.4622	0.00317315	3.04	-1.8738	0.838	MCM10	minichromosome maintenance 10 replication initiation factor
ILMN_2412860	0.3989	0.00077425	3.49	-0.829247	0.768	MCM4	minichromosome maintenance complex component 4
ILMN_1737205	0.4622	0.00309879	3.05	-1.85636	0.625	MCM4	minichromosome maintenance complex component 4
ILMN_1660462	0.3821	0.00040359	-3.69	-0.343486	-0.802	MCOLN2	mucolipin 2
ILMN_2212909	0.4576	0.0021182	3.17	-1.57583	1.02	MELK	maternal embryonic leucine zipper kinase
ILMN_2276811	0.4622	0.00318725	-3.04	-1.87707	-0.575	METTL17	methyltransferase like 17
ILMN_1734827	0.3099	6.507e-05	4.21	1.02259	0.893	MKI67	marker of proliferation Ki-67
ILMN_1795342	0.4622	0.00307695	-3.05	-1.85115	-0.86	MLPH	melanophilin
ILMN_1693702	0.4232	0.00115639	3.37	-1.1275	0.67	MRFAP1L1	Morf4 family associated protein 1 like 1
ILMN_1797731	0.4999	0.00716025	-2.76	-2.46927	-0.65	MS4A6A	membrane spanning 4-domains A6A
ILMN_1790906	0.499	0.00707161	2.76	-2.46021	1.07	MSMB	microseminoprotein beta
ILMN_2376313	0.5069	0.00731292	2.75	-2.48461	1.39	MSMB	microseminoprotein beta
ILMN_2373285	0.5222	0.0087706	-2.68	-2.61652	-0.638	MSR1	macrophage scavenger receptor 1
ILMN_1674706	0.4622	0.00264934	3.1	-1.74095	0.666	MTHFD2	methylenetetrahydrofolate dehydrogenase (NADP+ dependent) 2, methenyltetrahydrofolate cyclohydrolase
ILMN_2344650	0.5222	0.00871821	-2.69	-2.61217	-0.609	N4BP2L1	NEDD4 binding protein 2 like 1
ILMN_2315569	0.4622	0.00315958	-3.04	-1.87065	-0.57	N6AMT1	N-6 adenine-specific DNA methyltransferase 1 (putative)
ILMN_1751444	0.4802	0.0051063	2.88	-2.22275	0.785	NCAPG	non-SMC condensin I complex subunit G
ILMN_1796642	0.3989	0.00069943	-3.52	-0.753583	-0.753	NCF2	neutrophil cytosolic factor 2
ILMN_1785005	0.4622	0.00298093	-3.06	-1.82782	-0.72	NCF4	neutrophil cytosolic factor 4
ILMN_1664511	0.4802	0.00555342	2.85	-2.28408	0.674	NDC80	NDC80, kinetochore complex component
ILMN_1670535	0.5222	0.00892435	-2.68	-2.6291	-0.606	NDRG2	NDRG family member 2
ILMN_2310896	0.4802	0.00509671	-2.88	-2.22138	-0.664	NLRP3	NLR family pyrin domain containing 3
ILMN_1712026	0.525	0.00964883	-2.65	-2.68559	-0.61	NLRP3	NLR family pyrin domain containing 3
ILMN_1784783	0.427	0.00125991	-3.34	-1.19113	-0.836	NME5	NME/NM23 family member 5
ILMN_1762678	0.4301	0.0013308	-3.32	-1.23174	-0.533	NMT1	N-myristoyltransferase 1
ILMN_2184640	0.4622	0.0027377	3.09	-1.76513	0.561	NOLC1	nucleolar and coiled-body phosphoprotein 1
ILMN_1747067	0.477	0.00481939	-2.9	-2.18046	-0.644	NPAS1	neuronal PAS domain protein 1
ILMN_1735762	0.4622	0.00294855	-3.06	-1.81978	-0.832	NPNT	nephronectin
ILMN_1724479	0.4622	0.00327552	3.03	-1.89716	0.629	NR2C2	nuclear receptor subfamily 2 group C member 2
ILMN_1658247	0.5115	0.00817235	-2.71	-2.5653	-0.808	OAS1	2'-5'-oligoadenylate synthetase 1
ILMN_1665289	0.3821	0.00044663	-3.66	-0.419143	-0.595	OGFOD3	2-oxoglutarate and iron dependent oxygenase domain containing 3
ILMN_2196984	0.3821	0.00024052	3.84	0.043351	1.09	OIP5	Opa interacting protein 5
ILMN_1759277	0.3876	0.00054814	3.59	-0.57193	0.812	OIP5	Opa interacting protein 5
ILMN_1727459	0.4647	0.00388206	2.97	-2.02196	0.602	ORC1	origin recognition complex subunit 1
ILMN_1664094	0.4622	0.00308879	-3.05	-1.85398	-0.803	P2RY13	purinergic receptor P2Y13
ILMN_1768284	0.5191	0.00846336	-2.7	-2.59067	-0.59	P2RY8	purinergic receptor P2Y8
ILMN_1746618	0.4576	0.0025412	-3.11	-1.71022	-0.52	PAQR7	progestin and adipoQ receptor family member 7
ILMN_1814985	0.4687	0.00425828	2.94	-2.0898	0.546	PDLIM7	PDZ and LIM domain 7
ILMN_1734472	0.4871	0.00610566	-2.81	-2.35325	-1.03	PEBP4	phosphatidylethanolamine binding protein 4
ILMN_1704537	0.4758	0.00449464	2.92	-2.12939	0.949	PHGDH	phosphoglycerate dehydrogenase
ILMN_1766658	0.3099	5.181e-05	4.27	1.19344	1.11	PKMYT1	protein kinase, membrane associated tyrosine/threonine 1
ILMN_2401436	0.4622	0.00294503	3.06	-1.8189	0.617	PKMYT1	protein kinase, membrane associated tyrosine/threonine 1
ILMN_1810191	0.526	0.00992037	-2.64	-2.70565	-0.568	PLA2G4C	phospholipase A2 group IVC
ILMN_1786601	0.3821	0.00041642	3.68	-0.366855	0.515	PLAGL2	PLAG1 like zinc finger 2
ILMN_1806752	0.4876	0.00615397	-2.81	-2.359	-0.688	PLEKHH2	pleckstrin homology, MyTH4 and FERM domain containing H2
ILMN_1725145	0.3821	0.00024019	3.84	0.044393	0.504	POLA1	DNA polymerase alpha 1, catalytic subunit
ILMN_1728934	0.4622	0.00305866	3.05	-1.84676	0.678	PRC1	protein regulator of cytokinesis 1
ILMN_1780349	0.4895	0.00658857	-2.79	-2.40872	-1.05	PRG4	proteoglycan 4
ILMN_1674390	0.4576	0.0024034	3.13	-1.66909	0.821	PRKAR1B	protein kinase cAMP-dependent type I regulatory subunit beta
ILMN_1669781	0.5241	0.00954818	2.65	-2.67801	0.6	PRLR	prolactin receptor
ILMN_1671928	0.4805	0.00567822	-2.84	-2.30031	-0.61	PROS1	protein S (alpha)
ILMN_1782403	0.3846	0.0005029	3.62	-0.507689	0.95	PRR11	proline rich 11
ILMN_1692938	0.3821	0.00033018	3.75	-0.193524	1.03	PSAT1	phosphoserine aminotransferase 1
ILMN_1673553	0.4802	0.00554059	2.85	-2.28239	0.501	PTH2	parathyroid hormone 2
ILMN_1734543	0.5241	0.00921017	-2.67	-2.65193	-0.556	PTPRE	protein tyrosine phosphatase, receptor type E
ILMN_1788180	0.4622	0.00365986	-2.99	-1.9787	-0.584	RAB13	RAB13, member RAS oncogene family
ILMN_2052373	0.4576	0.00228026	-3.15	-1.63028	-0.744	RAB17	RAB17, member RAS oncogene family
ILMN_2255579	0.5115	0.00802241	-2.72	-2.55186	-0.889	RAB37	RAB37, member RAS oncogene family
ILMN_1748578	0.4232	0.00122076	3.35	-1.16771	0.615	RAD21	RAD21 cohesin complex component
ILMN_1721457	0.4622	0.00335231	3.02	-1.9142	0.503	RANBP1	RAN binding protein 1
ILMN_1790537	0.4105	0.00090046	3.44	-0.941604	0.615	RMI2	RecQ mediated genome instability 2
ILMN_1854349	0.4632	0.00371091	-2.99	-1.98887	-0.5	RNF217	ring finger protein 217
ILMN_1808041	0.4905	0.00668393	2.78	-2.41918	0.632	RPL10A	ribosomal protein L10a
ILMN_1749234	0.526	0.00995132	-2.64	-2.7079	-0.509	RPL13AP17	ribosomal protein L13a pseudogene 17
ILMN_1652736	0.4501	0.00174205	-3.24	-1.43127	-0.625	RPS6KA3	ribosomal protein S6 kinase A3
ILMN_2186137	0.4802	0.00524964	-2.87	-2.24299	-1.03	RRAD	RRAD, Ras related glycolysis inhibitor and calcium channel regulator
ILMN_1689212	0.4687	0.00416827	-2.95	-2.07414	-0.786	RSPH4A	radial spoke head 4 homolog A
ILMN_2262901	0.4015	0.00081332	-3.47	-0.86589	-0.633	RUFY3	RUN and FYVE domain containing 3
ILMN_1810037	0.4895	0.00661439	-2.79	-2.41157	-0.539	RUSC2	RUN and SH3 domain containing 2
ILMN_1783131	0.5241	0.00941094	2.66	-2.66753	0.504	SAMD13	sterile alpha motif domain containing 13
ILMN_1702197	0.4687	0.00409439	2.95	-2.06103	0.882	SAPCD2	suppressor APC domain containing 2
ILMN_2412822	0.4437	0.00145861	3.29	-1.29974	0.52	SCN3B	sodium voltage-gated channel beta subunit 3
ILMN_1815308	0.5115	0.00784568	-2.72	-2.53569	-0.527	SDC1	syndecan 1
ILMN_1665538	0.492	0.00676282	2.78	-2.42772	0.533	SKP2	S-phase kinase-associated protein 2, E3 ubiquitin protein ligase
ILMN_1739751	0.5091	0.00742769	-2.74	-2.49593	-0.508	SLC26A11	solute carrier family 26 member 11
ILMN_1719627	0.5182	0.00840484	-2.7	-2.58564	-0.568	SLC27A3	solute carrier family 27 member 3
ILMN_1723287	0.4622	0.00354911	-3	-1.95612	-0.6	SLC6A16	solute carrier family 6 member 16
ILMN_1777637	0.4232	0.00120462	-3.35	-1.15783	-0.844	SLFNL1	schlafen like 1
ILMN_1748923	0.4833	0.00578303	2.83	-2.31365	0.527	SMC2	structural maintenance of chromosomes 2
ILMN_1787326	0.3876	0.00061972	3.56	-0.663427	0.62	SNORA65	small nucleolar RNA, H/ACA box 65
ILMN_2082762	0.5094	0.00761237	2.74	-2.51377	0.627	SNORD68	small nucleolar RNA, C/D box 68
ILMN_1786766	0.4802	0.00528775	2.86	-2.24827	0.517	SNTB2	syntrophin beta 2
ILMN_1798615	0.3662	0.00010762	4.07	0.645471	1	SOHLH2	spermatogenesis and oogenesis specific basic helix-loop-helix 2
ILMN_1757845	0.4576	0.00229996	-3.15	-1.63663	-0.52	SPIRE1	spire type actin nucleation factor 1
ILMN_1772241	0.4622	0.00341158	3.01	-1.92708	0.68	SQLE	squalene epoxidase
ILMN_2361163	0.477	0.00467157	2.91	-2.15766	0.823	SSBP3	single stranded DNA binding protein 3
ILMN_2247572	0.4501	0.00176124	3.23	-1.43937	0.87	SSX1	SSX family member 1
ILMN_1799600	0.4622	0.00320007	-3.04	-1.88002	-0.593	STARD8	StAR related lipid transfer domain containing 8
ILMN_1657796	0.4501	0.00176227	3.23	-1.43981	0.69	STMN1	stathmin 1
ILMN_1681601	0.4871	0.00596136	-2.82	-2.33581	-0.744	SUCNR1	succinate receptor 1
ILMN_1785570	0.5222	0.00893393	-2.68	-2.62988	-0.552	SUSD3	sushi domain containing 3
ILMN_2407703	0.4802	0.00538012	2.86	-2.26093	0.911	SYN1	synapsin I
ILMN_1712075	0.4622	0.00308979	-3.05	-1.85422	-0.567	SYNM	synemin
ILMN_1710434	0.5241	0.00943125	-2.66	-2.66909	-0.509	TBC1D10C	TBC1 domain family member 10C
ILMN_2391789	0.4181	0.00098639	3.42	-1.00937	0.525	TDP1	tyrosyl-DNA phosphodiesterase 1
ILMN_1654570	0.4958	0.00695517	-2.77	-2.44813	-0.842	TEKT1	tektin 1
ILMN_2336094	0.5115	0.00793475	2.72	-2.54389	0.969	TENM3	teneurin transmembrane protein 3
ILMN_1694847	0.4622	0.00266704	3.1	-1.74586	0.567	TERF1	telomeric repeat binding factor 1
ILMN_1674662	0.4576	0.00196465	3.2	-1.52021	0.649	TICRR	TOPBP1 interacting checkpoint and replication regulator
ILMN_1806037	0.5241	0.00954517	2.65	-2.67778	0.675	TK1	thymidine kinase 1
ILMN_1688848	0.4294	0.00130428	-3.33	-1.21681	-0.699	TMEM44	transmembrane protein 44
ILMN_1728106	0.3989	0.00078703	-3.48	-0.841434	-0.809	TNF	tumor necrosis factor
ILMN_1699265	0.4576	0.00201512	-3.19	-1.53897	-0.545	TNFRSF10B	TNF receptor superfamily member 10b
ILMN_1812915	0.5115	0.00795966	-2.72	-2.54616	-0.523	TNFRSF10B	TNF receptor superfamily member 10b
ILMN_1666022	0.4871	0.0059613	-2.82	-2.33581	-0.596	TNFRSF10D	TNF receptor superfamily member 10d
ILMN_1796949	0.4501	0.00185734	3.21	-1.47868	0.969	TPX2	TPX2, microtubule nucleation factor
ILMN_2405991	0.3821	0.00035743	3.72	-0.252782	0.614	TRAF7	TNF receptor associated factor 7
ILMN_2404665	0.4576	0.00229201	-3.15	-1.63407	-0.531	TRIM5	tripartite motif containing 5
ILMN_1718621	0.477	0.00473694	-2.9	-2.16783	-0.79	TSPAN32	tetraspanin 32
ILMN_1788166	0.4576	0.00205378	3.18	-1.55301	0.896	TTK	TTK protein kinase
ILMN_2301083	0.5091	0.00751125	2.74	-2.50406	1	UBE2C	ubiquitin conjugating enzyme E2 C
ILMN_1785179	0.4622	0.00289385	-3.07	-1.80599	-0.508	UBE2G2	ubiquitin conjugating enzyme E2 G2
ILMN_2084073	0.4722	0.00441191	-2.93	-2.11578	-0.708	UCN	urocortin
ILMN_1786065	0.4622	0.00277488	3.08	-1.77506	0.836	UHRF1	ubiquitin like with PHD and ring finger domains 1
ILMN_1664698	0.4775	0.00484369	-2.89	-2.18414	-0.691	UNC119	unc-119 lipid binding chaperone
ILMN_1669747	0.3821	0.00038672	-3.7	-0.311594	-0.804	UNC13B	unc-13 homolog B
ILMN_1721116	0.3876	0.00060821	3.56	-0.649457	0.505	USP10	ubiquitin specific peptidase 10
ILMN_1805828	0.4453	0.00153673	3.28	-1.3384	0.651	VRK1	vaccinia related kinase 1
ILMN_1764769	0.5229	0.0089573	-2.68	-2.63177	-0.539	VWA5A	von Willebrand factor A domain containing 5A
ILMN_1688160	0.525	0.00963441	-2.65	-2.68451	-0.582	WDR27	WD repeat domain 27
ILMN_1745852	0.5115	0.00793254	-2.72	-2.54368	-0.502	WDR33	WD repeat domain 33
ILMN_2279873	0.3099	5.359e-05	-4.26	1.16817	-0.73	WHAMM	WAS protein homolog associated with actin, golgi membranes and microtubules
ILMN_1743711	0.4622	0.00313975	3.04	-1.86602	0.646	XPOT	exportin for tRNA
ILMN_1696266	0.4479	0.00162575	3.26	-1.38011	0.573	XRCC3	X-ray repair cross complementing 3
ILMN_2411127	0.4576	0.00223749	-3.15	-1.6163	-0.713	YBEY	ybeY metallopeptidase (putative)
ILMN_1694514	0.4687	0.00415553	-2.95	-2.0719	-1.03	ZDHHC11	zinc finger DHHC-type containing 11
ILMN_2343036	0.4622	0.00323417	3.03	-1.88782	0.5	ZMYM5	zinc finger MYM-type containing 5
ILMN_1656504	0.3876	0.00060596	-3.56	-0.646696	-0.525	ZNF304	zinc finger protein 304
ILMN_1657087	0.4659	0.00393276	-2.97	-2.03149	-1.46	ZNF385B	zinc finger protein 385B
ILMN_1713454	0.4895	0.00660307	-2.79	-2.41032	-0.58	ZNF671	zinc finger protein 671
ILMN_1715718	0.4802	0.00557021	-2.85	-2.28629	-0.539	ZNF784	zinc finger protein 784
ILMN_1773868	0.5241	0.00941206	-2.66	-2.66762	-0.512	ZRSR2	zinc finger CCCH-type, RNA binding motif and serine/arginine rich 2
ILMN_2362549	0.4622	0.00342225	3.01	-1.92938	0.745	ZWINT	ZW10 interacting kinetochore protein
ILMN_1684168	0.3099	7.266e-05	-4.18	0.939911	-0.534
ILMN_1741648	0.3821	0.00034999	-3.73	-0.23706	-1.85
ILMN_1893679	0.3821	0.00038118	-3.7	-0.300817	-1.01
ILMN_1702783	0.3876	0.00062745	3.55	-0.672673	0.638
ILMN_2405521	0.3989	0.00073206	3.51	-0.787535	0.805
ILMN_1872457	0.4015	0.00082266	-3.47	-0.874386	-0.807
ILMN_1856533	0.4105	0.00092675	-3.43	-0.963007	-1.25
ILMN_2281734	0.4232	0.00113535	-3.37	-1.11386	-0.624
ILMN_1679867	0.4232	0.00115767	3.37	-1.12832	0.615
ILMN_1703229	0.4437	0.00148536	3.29	-1.31321	0.518
ILMN_1664912	0.4479	0.00167043	-3.25	-1.40019	-0.577
ILMN_1724064	0.4576	0.0020902	3.18	-1.566	0.652
ILMN_2390310	0.4576	0.00212677	-3.17	-1.57881	-0.696
ILMN_1686852	0.4576	0.00216516	3.16	-1.59203	0.523
ILMN_1784706	0.4576	0.00236703	-3.14	-1.65784	-0.985
ILMN_1693804	0.4576	0.00244403	3.13	-1.68146	0.564
ILMN_2090040	0.4622	0.00266645	-3.1	-1.74569	-0.503
ILMN_1683552	0.4622	0.00312798	3.04	-1.86326	0.533
ILMN_1773952	0.4622	0.00350596	3	-1.94714	0.77
ILMN_1659365	0.4622	0.00361268	2.99	-1.96916	0.842
ILMN_1714730	0.4622	0.00363882	2.99	-1.97446	1.1
ILMN_1795089	0.4635	0.00374835	-2.98	-1.99624	-0.651
ILMN_1678300	0.4647	0.00380383	2.98	-2.00702	0.547
ILMN_1735877	0.4659	0.00393099	-2.97	-2.03116	-0.713
ILMN_1663142	0.4687	0.00420508	-2.94	-2.08059	-0.709
ILMN_2389970	0.477	0.00462072	-2.91	-2.14964	-0.564
ILMN_1874815	0.477	0.00478323	-2.9	-2.17494	-0.627
ILMN_1790315	0.4802	0.00501573	-2.88	-2.20967	-0.588
ILMN_1768798	0.4802	0.00539018	-2.86	-2.26229	-0.515
ILMN_1683096	0.4805	0.00571532	-2.84	-2.30506	-0.526
ILMN_1689336	0.4871	0.00604445	2.82	-2.34591	0.991
ILMN_1697665	0.492	0.00675406	2.78	-2.42678	0.526
ILMN_1912083	0.5094	0.00763089	-2.73	-2.51553	-0.815
ILMN_1681260	0.5094	0.00769436	2.73	-2.52155	0.526
ILMN_1671442	0.5115	0.00791739	2.72	-2.5423	0.572
ILMN_1699521	0.5241	0.00938029	-2.66	-2.66517	-0.889
ILMN_1754757	0.5241	0.0095639	-2.65	-2.6792	-0.726
